# Supplementary material for: Candidate Genes and MiRNAs Linked to the Inverse Relationship Between Cancer and Alzheimer’s Disease: Insights From Data Mining and Enrichment Analysis
Source: Front Genet. 2019 Sep 24;10:846. doi: 10.3389/fgene.2019.00846 (PMC6771301; doi:10.3389/fgene.2019.00846)
Supplement: Table S1 — Description of ALZCAN gene set. The table includes the following columns: Ensembl ID, Entrez Gene ID, Gene Symbol, description, BEEGLE Gene Rank, ALZGSET flag, AlzDEGs (total studies), AD DEGs (Up), AD DEGs (Dn), CGC flag, HPA prognostic flag, TWAS flag, longevity flag. [file Table_1.xlsx]

## Sheet: suppl Table 1
Ensembl ID	Entrez Gene ID	Gene Symbol	Description	BEEGLE_Gene Rank	ALZGSET flag	Alz* DEGs sum (n°studies)	AD DEGs (Up)	AD DEGs (Dn)	CGC flag	HPA prognostic flag	TWAS flag	Longevity flag
ENSG00000085563	5243	ABCB1	ATP binding cassette subfamily B member 1	23	0	3	3	0	0	1	0	0
ENSG00000125257	10257	ABCC4	ATP binding cassette subfamily C member 4	104	0	10	7	3	0	1	0	1
ENSG00000118777	9429	ABCG2	ATP binding cassette subfamily G member 2 (Junior blood group)	32	1	6	3	3	0	0	0	0
ENSG00000137845	102	ADAM10	ADAM metallopeptidase domain 10	4	1	2	2	0	0	1	0	0
ENSG00000148848	8038	ADAM12	ADAM metallopeptidase domain 12	39	1	3	2	0	0	1	0	0
ENSG00000151694	6868	ADAM17	ADAM metallopeptidase domain 17	22	0	4	3	1	0	1	0	0
ENSG00000274286	151	ADRA2B	adrenoceptor alpha 2B	108	1	na	na	na	0	0	0	0
ENSG00000204305	177	AGER	advanced glycosylation end-product specific receptor	6	1	2	2	0	0	1	0	1
ENSG00000108599	11216	AKAP10	A-kinase anchoring protein 10	77	0	5	5	0	0	0	0	1
ENSG00000241978	11217	AKAP2	A-kinase anchoring protein 2	54	0	na	na	na	0	0	0	0
ENSG00000053371	8574	AKR7A2	aldo-keto reductase family 7 member A2	56	0	1	1	0	0	1	0	0
ENSG00000111275	217	ALDH2	aldehyde dehydrogenase 2 family member	129	1	4	3	1	1	1	0	0
ENSG00000100823	328	APEX1	apurinic/apyrimidinic endodeoxyribonuclease 1	26	0	4	0	4	0	1	0	0
ENSG00000084674	338	APOB	apolipoprotein B	121	0	0	0	0	0	0	0	1
ENSG00000130208	341	APOC1	apolipoprotein C1	17	1	11	11	0	0	1	1	1
ENSG00000130203	348	APOE	apolipoprotein E	5	1	4	4	0	0	0	1	1
ENSG00000142192	351	APP	amyloid beta precursor protein	3	1	7	0	6	0	1	0	0
ENSG00000138303	51008	ASCC1	activating signal cointegrator 1 complex subunit 1	51	0	1	0	1	0	1	0	0
ENSG00000115966	1386	ATF2	activating transcription factor 2	44	0	3	3	0	0	1	0	0
ENSG00000174437	488	ATP2A2	ATPase sarcoplasmic/endoplasmic reticulum Ca2+ transporting 2	110	0	8	1	7	0	0	0	0
ENSG00000182240	25825	BACE2	beta-secretase 2	50	1	9	8	0	0	1	0	0
ENSG00000151929	9531	BAG3	BCL2 associated athanogene 3	53	0	12	12	0	0	0	0	0
ENSG00000126581	8678	BECN1	beclin 1	20	0	8	0	8	0	0	0	0
ENSG00000198908	80823	BHLHB9	basic helix-loop-helix family member b9	41	0	7	0	7	0	0	0	0
ENSG00000136717	274	BIN1	bridging integrator 1	74	1	3	3	0	0	0	1	0
ENSG00000012048	672	BRCA1	BRCA1, DNA repair associated	40	0	3	1	2	1	0	0	0
ENSG00000172270	682	BSG	basigin (Ok blood group)	72	0	1	0	1	0	1	0	0
ENSG00000014216	823	CAPN1	calpain 1	106	0	4	4	0	0	1	0	0
ENSG00000135773	10753	CAPN9	calpain 9	47	0	na	na	na	0	0	0	0
ENSG00000036828	846	CASR	calcium sensing receptor	134	1	1	0	1	0	0	0	0
ENSG00000158941	57805	CCAR2	cell cycle and apoptosis regulator 2	28	0	na	na	na	0	1	0	0
ENSG00000160791	1234	CCR5	C-C motif chemokine receptor 5 (gene/pseudogene)	96	0	3	3	0	0	1	0	0
ENSG00000147889	1029	CDKN2A	cyclin dependent kinase inhibitor 2A	24	1	2	2	0	1	1	0	0
ENSG00000147883	1030	CDKN2B	cyclin dependent kinase inhibitor 2B	130	0	na	na	na	0	1	0	1
ENSG00000185043	10519	CIB1	calcium and integrin binding 1	61	0	2	2	0	0	1	0	0
ENSG00000109846	1410	CRYAB	crystallin alpha B	124	0	9	9	0	0	1	0	0
ENSG00000168036	1499	CTNNB1	catenin beta 1	38	0	1	0	1	1	1	0	0
ENSG00000196188	1510	CTSE	cathepsin E	69	0	na	na	na	0	1	0	0
ENSG00000116133	1718	DHCR24	24-dehydrocholesterol reductase	8	1	13	2	10	0	1	0	0
ENSG00000198719	28514	DLL1	delta like canonical Notch ligand 1	86	0	8	8	0	0	0	0	0
ENSG00000119772	1788	DNMT3A	DNA methyltransferase 3 alpha	119	0	na	na	na	1	1	0	0
ENSG00000088305	1789	DNMT3B	DNA methyltransferase 3 beta	118	1	1	1	0	0	1	0	0
ENSG00000138798	1950	EGF	epidermal growth factor	135	0	2	0	2	0	0	0	0
ENSG00000146648	1956	EGFR	epidermal growth factor receptor	42	0	12	10	2	0	1	0	0
ENSG00000128829	440275	EIF2AK4	eukaryotic translation initiation factor 2 alpha kinase 4	37	0	1	1	0	0	0	0	0
ENSG00000091831	2099	ESR1	estrogen receptor 1	19	1	1	1	0	1	1	0	1
ENSG00000140009	2100	ESR2	estrogen receptor 2	34	1	0	0	0	0	0	0	0
ENSG00000149557	9638	FEZ1	fasciculation and elongation protein zeta 1	79	0	4	4	0	0	1	0	0
ENSG00000086205	2346	FOLH1	folate hydrolase 1	29	0	6	2	4	0	1	0	0
ENSG00000152822	2911	GRM1	glutamate metabotropic receptor 1	95	0	6	0	6	0	0	0	0
ENSG00000186088	54103	GSAP	gamma-secretase activating protein	52	0	na	na	na	0	1	0	0
ENSG00000105723	2931	GSK3A	glycogen synthase kinase 3 alpha	97	0	1	0	1	0	1	0	0
ENSG00000082701	2932	GSK3B	glycogen synthase kinase 3 beta	13	1	7	5	1	0	1	0	0
ENSG00000100744	51527	GSKIP	GSK3B interacting protein	43	0	2	2	0	0	0	0	0
ENSG00000094631	10013	HDAC6	histone deacetylase 6	88	0	na	na	na	0	1	0	0
ENSG00000010704	3077	HFE	homeostatic iron regulator	92	1	1	1	0	0	0	0	1
ENSG00000181061	25994	HIGD1A	HIG1 hypoxia inducible domain family member 1A	49	0	8	0	8	0	1	0	0
ENSG00000189403	3146	HMGB1	high mobility group box 1	31	0	2	2	0	0	0	1	0
ENSG00000080824	3320	HSP90AA1	heat shock protein 90 alpha family class A member 1	46	0	5	2	3	1	1	0	0
ENSG00000113013	3313	HSPA9	heat shock protein family A (Hsp70) member 9	84	0	1	1	0	0	1	0	0
ENSG00000170276	3316	HSPB2	heat shock protein family B (small) member 2	87	0	9	7	0	0	0	0	0
ENSG00000166033	5654	HTRA1	HtrA serine peptidase 1	111	0	7	5	2	0	1	0	0
ENSG00000119912	3416	IDE	insulin degrading enzyme	101	1	1	1	0	0	1	0	0
ENSG00000126709	2537	IFI6	interferon alpha inducible protein 6	57	0	5	1	4	0	0	0	0
ENSG00000140443	3480	IGF1R	insulin like growth factor 1 receptor	115	0	4	3	0	0	1	0	0
ENSG00000115008	3552	IL1A	interleukin 1 alpha	109	1	2	1	0	0	1	0	0
ENSG00000125538	3553	IL1B	interleukin 1 beta	80	1	7	4	2	0	1	0	0
ENSG00000136244	3569	IL6	interleukin 6	48	1	6	4	2	0	1	0	1
ENSG00000153487	3621	ING1	inhibitor of growth family member 1	89	0	2	0	2	0	1	0	0
ENSG00000254647	3630	INS	insulin	137	1	0	0	0	0	0	0	1
ENSG00000171105	3643	INSR	insulin receptor	105	0	3	3	0	0	0	0	1
ENSG00000133116	9365	KL	klotho	123	0	4	1	3	0	1	0	1
ENSG00000167748	3816	KLK1	kallikrein 1	103	0	0	0	0	0	0	0	0
ENSG00000167755	5653	KLK6	kallikrein related peptidase 6	12	0	6	6	0	0	1	0	0
ENSG00000129455	11202	KLK8	kallikrein related peptidase 8	68	0	1	1	0	0	1	0	0
ENSG00000133703	3845	KRAS	KRAS proto-oncogene, GTPase	138	0	4	4	0	1	1	0	0
ENSG00000160789	4000	LMNA	lamin A/C	133	1	6	5	0	1	0	0	1
ENSG00000123384	4035	LRP1	LDL receptor related protein 1	55	1	0	0	0	0	1	0	0
ENSG00000168702	53353	LRP1B	LDL receptor related protein 1B	71	0	6	1	5	1	0	0	1
ENSG00000186868	4137	MAPT	microtubule associated protein tau	9	1	5	0	4	0	0	0	0
ENSG00000258839	4157	MC1R	melanocortin 1 receptor	128	0	4	4	0	0	1	0	0
ENSG00000087245	4313	MMP2	matrix metallopeptidase 2	64	0	4	4	0	0	0	0	0
ENSG00000149968	4314	MMP3	matrix metallopeptidase 3	33	1	3	2	1	0	1	0	0
ENSG00000005381	4353	MPO	myeloperoxidase	63	1	3	0	3	0	0	0	0
ENSG00000198793	2475	MTOR	mechanistic target of rapamycin kinase	25	0	na	na	na	1	1	0	1
ENSG00000188554	4077	NBR1	NBR1, autophagy cargo receptor	62	0	na	na	na	0	1	0	0
ENSG00000011052	654364	NME1-NME2	NME1-NME2 readthrough	78	0	na	na	na	0	1	0	0
ENSG00000053438	4826	NNAT	neuronatin	60	0	7	0	7	0	0	0	0
ENSG00000148400	4851	NOTCH1	notch 1	18	0	14	14	0	1	1	0	0
ENSG00000078618	4898	NRDC	nardilysin convertase	73	0	na	na	na	0	1	0	0
ENSG00000114026	4968	OGG1	8-oxoguanine DNA glycosylase	30	1	2	1	1	0	1	0	0
ENSG00000116288	11315	PARK7	Parkinsonism associated deglycase	126	0	3	0	3	0	0	0	0
ENSG00000177425	5074	PAWR	pro-apoptotic WT1 regulator	99	0	3	0	3	0	0	0	0
ENSG00000089220	5037	PEBP1	phosphatidylethanolamine binding protein 1	21	0	5	0	5	0	1	0	0
ENSG00000105851	5294	PIK3CG	phosphatidylinositol-4,5-bisphosphate 3-kinase catalytic subunit gamma	131	0	2	0	2	0	0	0	0
ENSG00000127445	5300	PIN1	peptidylprolyl cis/trans isomerase, NIMA-interacting 1	1	0	7	0	7	0	1	0	0
ENSG00000005421	5444	PON1	paraoxonase 1	114	1	1	1	0	0	1	0	1
ENSG00000186951	5465	PPARA	peroxisome proliferator activated receptor alpha	112	1	3	3	0	0	1	0	0
ENSG00000132170	5468	PPARG	peroxisome proliferator activated receptor gamma	14	1	0	0	0	1	1	0	1
ENSG00000109819	10891	PPARGC1A	PPARG coactivator 1 alpha	127	0	3	0	2	0	1	0	1
ENSG00000221823	5534	PPP3R1	protein phosphatase 3 regulatory subunit B, alpha	81	0	9	0	9	0	1	0	0
ENSG00000132356	5562	PRKAA1	protein kinase AMP-activated catalytic subunit alpha 1	116	0	1	0	1	0	0	1	0
ENSG00000072062	5566	PRKACA	protein kinase cAMP-activated catalytic subunit alpha	117	0	3	0	3	1	1	0	0
ENSG00000185345	5071	PRKN	parkin RBR E3 ubiquitin protein ligase	11	0	2	0	2	0	1	0	1
ENSG00000171867	5621	PRNP	prion protein	136	1	4	0	4	0	1	0	0
ENSG00000080815	5663	PSEN1	presenilin 1	15	1	2	1	1	0	1	0	0
ENSG00000143801	5664	PSEN2	presenilin 2	27	1	6	0	4	0	0	0	0
ENSG00000073756	5743	PTGS2	prostaglandin-endoperoxide synthase 2	2	1	7	2	4	0	1	0	0
ENSG00000105426	5802	PTPRS	protein tyrosine phosphatase, receptor type S	65	0	2	0	2	0	1	0	0
ENSG00000159200	1827	RCAN1	regulator of calcineurin 1	59	1	1	1	0	0	0	0	0
ENSG00000168028	3921	RPSA	ribosomal protein SA	91	0	0	0	0	0	0	0	0
ENSG00000143546	6279	S100A8	S100 calcium binding protein A8	98	0	6	4	2	0	1	0	0
ENSG00000163220	6280	S100A9	S100 calcium binding protein A9	125	0	4	3	1	0	1	0	0
ENSG00000107957	9644	SH3PXD2A	SH3 and PX domains 2A	67	1	0	0	0	0	1	0	0
ENSG00000147955	10280	SIGMAR1	sigma non-opioid intracellular receptor 1	93	1	0	0	0	0	1	0	0
ENSG00000096717	23411	SIRT1	sirtuin 1	16	0	8	7	0	0	0	0	1
ENSG00000142082	23410	SIRT3	sirtuin 3	102	0	3	0	3	0	1	0	1
ENSG00000145335	6622	SNCA	synuclein alpha	35	1	13	0	12	0	0	0	0
ENSG00000173267	6623	SNCG	synuclein gamma	10	0	9	0	9	0	1	0	0
ENSG00000142168	6647	SOD1	superoxide dismutase 1	120	1	7	0	7	0	0	0	0
ENSG00000115904	6654	SOS1	SOS Ras/Rac guanine nucleotide exchange factor 1	82	0	2	1	1	0	0	0	0
ENSG00000161011	8878	SQSTM1	sequestosome 1	94	0	5	5	0	0	1	1	0
ENSG00000103266	10273	STUB1	STIP1 homology and U-box containing protein 1	107	0	6	3	3	0	1	0	0
ENSG00000139546	6895	TARBP2	TARBP2, RISC loading complex RNA binding subunit	85	0	2	2	0	0	1	0	0
ENSG00000007350	8277	TKTL1	transketolase like 1	83	0	na	na	na	0	0	0	0
ENSG00000136869	7099	TLR4	toll like receptor 4	90	1	5	5	0	0	1	0	1
ENSG00000162604	83941	TM2D1	TM2 domain containing 1	45	0	3	0	3	0	1	0	0
ENSG00000232810	7124	TNF	tumor necrosis factor	100	1	0	0	0	0	0	0	1
ENSG00000141510	7157	TP53	tumor protein p53	7	1	3	3	0	1	1	0	1
ENSG00000107614	1787	TRDMT1	tRNA aspartic acid methyltransferase 1	66	0	2	1	1	0	0	0	0
ENSG00000106025	23554	TSPAN12	tetraspanin 12	58	0	3	3	0	0	0	0	0
ENSG00000154277	7345	UCHL1	ubiquitin C-terminal hydrolase L1	70	1	16	0	15	0	1	0	0
ENSG00000175567	7351	UCP2	uncoupling protein 2	132	0	5	3	1	0	1	1	1
ENSG00000175564	7352	UCP3	uncoupling protein 3	122	0	4	1	3	0	0	0	1
ENSG00000125084	7471	WNT1	Wnt family member 1	113	0	na	na	na	0	0	0	0
ENSG00000184937	7490	WT1	Wilms tumor 1	76	0	2	1	1	1	0	0	0
ENSG00000073050	7515	XRCC1	X-ray repair cross complementing 1	36	0	0	0	0	0	1	0	0
ENSG00000084073	10269	ZMPSTE24	zinc metallopeptidase STE24	75	0	1	0	1	0	1	0	0
