# Supplementary material for: Candidate Genes and MiRNAs Linked to the Inverse Relationship Between Cancer and Alzheimer’s Disease: Insights From Data Mining and Enrichment Analysis
Source: Front Genet. 2019 Sep 24;10:846. doi: 10.3389/fgene.2019.00846 (PMC6771301; doi:10.3389/fgene.2019.00846)
Supplement: Table S2 — The gene expression levels of 138 ALZCAN genes across 53 human tissues (GTEx database). Gene expression data are reported as raw data of Reads Per Kilobase per Million mapped reads (RPKM). [file Table_2.xlsx]

## Sheet: Table S3
							Adipose - Subcutaneous	Adipose - Visceral (Omentum)	Adrenal Gland	Artery - Aorta	Artery - Coronary	Artery - Tibial	Bladder	Brain - Amygdala	Brain - Anterior cingulate cortex (BA24)	Brain - Caudate (basal ganglia)	Brain - Cerebellar Hemisphere	Brain - Cerebellum	Brain - Cortex	Brain - Frontal Cortex (BA9)	Brain - Hippocampus	Brain - Hypothalamus	Brain - Nucleus accumbens (basal ganglia)	Brain - Putamen (basal ganglia)	Brain - Spinal cord (cervical c-1)	Brain - Substantia nigra	Breast - Mammary Tissue	Cells - EBV-transformed lymphocytes	Cells - Transformed fibroblasts	Cervix - Ectocervix	Cervix - Endocervix	Colon - Sigmoid	Colon - Transverse	Esophagus - Gastroesophageal Junction	Esophagus - Mucosa	Esophagus - Muscularis	Fallopian Tube	Heart - Atrial Appendage	Heart - Left Ventricle	Kidney - Cortex	Liver	Lung	Minor Salivary Gland	Muscle - Skeletal	Nerve - Tibial	Ovary	Pancreas	Pituitary	Prostate
#chrom	chromStart	chromEnd	name	score	strand	geneId2	1	2	3	4	5	6	7	8	9	10	11	12	13	14	15	16	17	18	19	20	21	22	23	24	25	26	27	28	29	30	31	32	33	34	35	36	37	38	39	40	41	42	43
chr7	87503858	87713295	APOE	685	+	ENSG00000130203	179.412	109.385	1976.73	29.351	77.391	6.571	25.947	636.386	377.98	910.09	215.019	292.613	287.258	278.993	330.215	595.426	879.989	873.953	262.747	860.206	149.867	1.053	18.903	78.595	86.668	22.928	54.187	6.179	12.208	5.228	45.814	44.899	11.512	302.358	1786.39	105.417	26.233	3.647	29.475	193.921	8.091	40.483	15.262
chr13	95019828	95301433	PEBP1	698	+	ENSG00000089220	170.779	159.13	1366.75	188.597	179.568	181.325	192.838	492.435	540.438	498.084	468.872	488.384	578.528	642.272	490.791	520.921	527.703	485.392	482.669	490.436	175.425	115.394	108.743	182.999	188.845	168.499	156.859	192.205	144.55	179.057	177.862	208.089	222.205	402.478	693.585	137.344	180.4	163.683	288.2	233.809	130.279	300.791	218.197
chr4	88090263	88231322	HSP90AA1	669	-	ENSG00000080824	139.294	202.983	243.033	168.223	154.383	133.753	198.057	259.163	318.442	318.082	290.896	253.477	315.225	373.019	303.968	423.552	347.975	278.097	308.109	353.394	159.133	314.877	178.917	128.283	155.052	145.344	143.108	149.721	129.427	155.771	151.903	194.287	156.018	164.612	118.13	178.452	174.416	121.085	144.863	162.625	100.418	242.12	154.925
chr15	58595203	58749978	UCHL1	610	+	ENSG00000154277	19.119	13.556	17.205	28.997	29.716	18.085	17.617	232.735	385.027	233.341	103.729	130.509	508.26	541.479	262.241	528.408	375.154	177.592	163.267	315.259	5.682	2.224	23.035	10.169	7.979	30.547	12.086	10.564	1.696	12.285	3.732	13.202	2.577	29.857	0.363	4.802	2.047	6.646	30.903	30.603	4.158	291.808	8.974
chr10	126012380	126388455	CRYAB	657	-	ENSG00000109846	220.863	142.457	21.471	269.677	219.711	263.591	85.496	145.811	70.103	124.706	109.4	124.478	92.674	88.782	229.523	159.73	91.53	169.814	677.161	378.436	108.069	0.649	27.278	121.044	92.229	132.681	49.291	134.537	29.057	145.149	58.254	976.12	1312.24	378.051	3.174	40.268	56.967	695.985	407.577	17.977	5.296	38.286	56.901
chr2	9491100	9555792	APP	633	-	ENSG00000142192	110.196	118.716	188.892	156.438	102.714	117.638	142.584	167.051	183.868	191.203	172.517	96.028	143.351	292.08	199.231	207.981	205.731	163.193	208.673	184.442	142.179	26.029	140.581	90.41	108.809	101.338	127.479	115.586	44.328	123.752	108.994	101.132	66.278	188.718	40.307	127.767	131.222	15.557	120.615	115.216	51.082	83.135	77.834
chr6	32180967	32183201	BSG	659	+	ENSG00000172270	160.413	180.197	275.956	197.374	171.074	151.318	180.046	157.858	191.02	183.269	120.627	137.372	225.397	208.596	159.91	141.824	152.195	184.796	92.329	149.716	157.18	110.046	189.459	141.361	194.476	211.999	296.055	146.291	97.563	134.31	186.684	345.278	481.338	276.867	49.44	136.449	125.342	102.887	127.776	158.429	69.445	218.875	145.688
chr17	19904301	19978343	ALDH2	635	+	ENSG00000111275	225.974	209.558	218.555	104.792	109.692	105.244	119.979	192.376	214.819	239.243	52.053	69.192	179.195	173.728	129.603	144.584	202.006	210.086	100.908	180.304	139.814	10.254	18.539	63.657	62.216	138.056	145.198	149.555	86.839	148.326	80.953	143.053	115.098	118.483	594.944	157.976	51.642	74.21	72.548	85.696	27.565	63.923	81.127
chr9	110048597	110148703	PRNP	591	+	ENSG00000171867	32.611	41.377	24.794	74.024	56.683	48.629	73.576	115.06	155.511	130.104	213.684	162.703	145.575	206.04	112.764	103.744	138.726	111.053	94.066	90.081	42.829	5.9	64.505	72.445	82.058	130.638	40.439	69.333	27.795	56.403	53.646	50.506	40.225	24.393	14.07	42.317	31.433	17.791	83.396	67.391	9.606	59.09	51.992
chr1	19303964	19312146	SOD1	613	+	ENSG00000142168	84.975	77.91	204.808	93.348	87.98	87.021	80.451	134.597	154.621	135.254	84.93	83.7	137.137	170.921	124.225	176.207	149.378	129.846	116.344	149.647	77.992	73.71	62.723	69.767	65.561	74.42	79.532	76.989	59.587	75.359	62.779	90.25	100.051	114.913	235.893	52.167	52.276	64.943	79.845	98.597	21.871	90.023	76.691
chr12	111766886	111809978	HTRA1	609	+	ENSG00000166033	126.918	110.21	36.181	268.568	145.955	139.083	55.751	155.601	141.737	188.491	28.95	44.175	118.25	116.963	129.512	101.533	152.541	193.492	116.804	144.948	114.907	0.191	211.508	135.081	183.66	74.374	36.749	62.651	14.493	53.302	82.579	30.707	21.246	58.632	52.72	36.291	45.361	6.046	99.2	211.834	14.597	105.377	37.875
chr14	20455190	20456860	NNAT	583	+	ENSG00000053438	12.487	8.995	1.24	0.562	1.193	0.453	14.585	125.465	115.613	183.257	32.228	30.786	80.516	85.466	108.868	119.154	523.906	134.206	6.908	11.015	12.883	0.685	0.785	6.149	3.747	50.323	12.278	3.691	2.045	5.467	1.946	1.31	0.929	0.881	0.691	1.596	4.356	3.893	1.751	1.165	0.573	1484.12	3.057
chr2	21001428	21044073	FEZ1	543	-	ENSG00000149557	6.8	6.066	2.205	26.779	19.635	16.213	9.938	109.801	80.009	98.252	83.039	80.513	92.951	92.345	125.235	93.665	91.009	111.992	294.281	158.469	4.545	11.593	13.803	10.822	12.285	16.146	5.422	14.439	1.857	15.902	7.206	12.624	4.829	2.353	1.18	12.937	2.321	0.954	37.724	6.275	0.642	7.514	6.917
chr19	44914246	44919349	RPSA	662	+	ENSG00000168028	168.668	190.814	144.329	139.174	167.172	127.509	184.287	123.74	98.755	114.039	72.803	72.055	99.931	99.493	109.033	109.648	141.835	117.737	130.794	115.193	208.178	588.176	411.797	244.619	225.572	184.473	207.962	164.417	268.239	162.907	218.656	99.818	73.523	146.358	88.139	177.314	190.974	91.773	192.731	427.055	291.383	167.814	245.227
chr19	44905753	44909393	PARK7	607	+	ENSG00000116288	77.921	83.706	137.564	96.912	95.432	82.634	69.725	102	106.385	99.351	104.875	99.17	101.134	109.871	90.342	106.608	110.668	91.906	83.234	95.121	84.201	131.638	95.631	79.81	77.182	85.453	68.375	87.787	45.899	87.125	82.052	83.395	85.492	88.833	63.328	66.761	61.967	102.361	98.386	85.499	52.76	118.342	95.362
chr21	25880549	26170820	HIGD1A	588	-	ENSG00000181061	49.617	55.269	59.677	54.673	59.111	62.419	57.674	107.232	115.003	90.2	56.586	49.296	93.101	123.222	93.921	113.79	108.483	93.199	122.476	116.076	46.132	46.619	45.983	65.576	39.557	48.454	86.025	95.754	65.549	88.003	51.656	77.476	100.234	70.997	83.614	43.168	44.523	46.216	50.844	23.637	15.696	69.167	61.386
chr10	72096519	72217134	SNCG	550	+	ENSG00000173267	74.829	48.443	127.215	23.936	62.463	112.248	103.736	144.426	108.602	41.896	22.609	38.793	92.615	120.042	75.486	237.103	37.226	39.464	24.053	125.687	41.264	0.11	2.571	17.108	15.646	12.615	6.476	14.456	7.8	12.131	24.705	6.953	7.02	7.599	0.75	7.25	6.708	2.703	41.076	16.462	1.24	4.254	17.304
chr2	175072249	175168382	BIN1	557	-	ENSG00000136717	26.592	25.21	53.488	8.577	13.329	7.464	47.727	71.49	57.619	63.847	71.633	72.469	73.161	65.852	92.478	71.703	68.838	83.425	86.389	82.59	23.995	19.768	14.561	29.999	38.345	22.361	16.577	23.186	6.345	18.527	35.18	4.358	4.845	46.198	11.028	14.643	9.289	441.052	51.155	20.928	7.454	32.528	35.659
chr12	110280755	110351090	PPP3R1	527	-	ENSG00000221823	23.131	22.558	20.193	15.148	17.521	16.493	17.547	47.71	78.332	82.063	75.719	43.908	57.157	121.844	66.51	37.036	93.409	63.062	15.166	22.523	19.462	23.026	16.156	20.685	22.651	15.579	14.078	14.117	17.453	12.95	18.374	10.624	8.039	11.497	13.786	19.811	13.934	15.948	20.373	16.288	8.798	15.634	17.488
chr21	41167800	41282518	IFI6	555	-	ENSG00000126709	32.164	34.913	87.602	61.167	53.921	30.779	16.166	52.595	50.485	48.625	36.284	36.333	56.531	61.683	48.185	88.609	46.021	59.292	43.753	48.978	31.095	145.158	25.805	34.845	32.579	34.616	19.969	33.432	7.693	29.6	28.129	33.308	21.068	33.924	18.622	74.469	25.472	4.663	46.234	33.82	9.472	143.442	31.048
chr10	119651369	119677819	HSPA9	577	-	ENSG00000113013	48.971	57.219	150.785	40.9	42.51	44.493	60.288	45.12	55.268	54.798	50.702	46.955	58.285	65.628	44.16	58.44	51.607	46.112	43.281	51.994	53.255	123.871	77.696	48.514	45.058	44.625	60.094	45.791	52.252	44.314	49.436	69.568	89.578	71.914	67.607	45.347	53.329	93.332	51.4	59.198	32.722	59.136	47.304
chrX	102720687	102753540	GSK3A	540	-	ENSG00000105723	23.457	23.946	34.454	26.836	26.425	29.236	27.839	40.823	59.74	43.394	56.347	60.433	76.093	71.904	45.639	40.245	43.927	42.408	25.905	30.263	25.148	24.89	21.099	27.361	31.477	30.59	28.95	32.092	26.308	32.573	28.872	20.145	21.591	30.944	14.385	27.004	25.04	28.602	27.568	29.922	14.131	33.795	34.375
chr2	127048026	127107355	DHCR24	580	-	ENSG00000116133	27.366	29.164	807.732	10.162	8.988	8.126	11.971	16.979	28.641	19.464	31.689	32.845	46.976	46.176	34.009	36.972	27.531	15.784	234.174	42.253	41.189	39.336	34.123	6.254	12.742	3.627	30.636	5.419	183.906	4.637	10.153	6.792	4.504	26.618	230.947	105.7	90.301	45.927	40.489	14.596	10.819	9.178	54.314
chr17	43044294	43125483	STUB1	545	+	ENSG00000103266	34.615	32.344	50.075	36.185	36.905	36.434	34.392	42.213	56.201	37.193	51.89	50.589	58.71	60.027	38.027	38.156	41.379	35.829	26.321	35.218	33.355	23.148	34.698	35.036	32.606	37.939	31.871	39.448	30.061	37.703	32.866	28.978	31.642	35.693	19.479	29.631	30.888	39.028	36.878	31.655	23.616	44.728	37.04
chr19	571296	583493	PIN1	512	+	ENSG00000127445	14.707	14.031	22.829	18.768	18.666	17.559	17.92	29.932	49.511	33.645	40.145	42.227	67.313	61.671	35.547	38.094	37.296	35.27	19.771	31.571	14.581	17.769	11.423	19.019	18.159	22.161	15.937	21.4	12.414	21.628	19.31	15.944	15.641	18.286	9.347	14.783	10.617	11.555	20.151	16.649	6.968	24.878	23.67
chr11	65181871	65212006	APOC1	574	+	ENSG00000130208	8.246	4.798	392.421	1.607	3.004	0.31	2.1	29.573	5.539	90.225	1.027	1.19	4.628	4.447	12.735	49.34	94.845	87.357	23.171	85.621	11.768	0.71	1.711	3.474	5.611	0.717	4.998	0.436	0.732	0.455	5.736	1.008	0.469	2.226	1735.98	51.857	3.197	1.293	3.147	9.034	1.077	3.765	2.363
chr1	230747383	230802003	CTNNB1	561	+	ENSG00000168036	48.035	50.311	55.1	44.446	54.375	76.679	54.845	27.946	28.571	28	78.426	66.622	28.581	32.576	29.72	34.484	29.226	24.483	28.884	26.839	55.985	29.737	54.253	83.426	88.314	42.504	52.066	39.981	40.797	39.493	61.512	30.092	25.453	31.858	19.807	60.369	55.638	15.941	64.094	72.332	22.78	34.401	56.786
chr3	122183682	122286495	HMGB1	546	-	ENSG00000189403	45.53	39.47	26.806	37.76	39.108	46.002	37.423	34.983	29.828	32.861	44.784	37.041	26.774	32.127	33.173	37.684	32.96	30.838	41.642	35.178	47.761	58.901	28.773	57.291	52.909	44.364	35.805	39.18	31.741	35.677	55.232	21.335	16.119	28.791	19.199	38.1	29.609	21.722	51.599	44.474	14.971	31.001	43.129
chr8	22604631	22619015	ATP2A2	563	+	ENSG00000174437	23.891	26.219	24.065	50.059	46.793	52.323	43.255	25.794	38.865	39.673	44.334	37.112	33.484	57.751	28.315	27.153	35.214	34.185	18.252	23.501	23.718	24.368	49.024	32.541	25.61	27.704	30.744	34.252	46.22	36.379	34.449	318.967	236.354	19.169	19.396	27.89	38.904	365.384	21.208	26.306	12.432	24.5	38.527
chr3	46370141	46376206	SNCA	457	-	ENSG00000145335	1.643	2.614	0.791	0.903	1.823	0.705	1.555	29.601	52.209	16.733	51.684	35.355	39.262	60.637	23.143	21.969	24.459	16.119	20.321	27.996	1.792	0.036	0.059	5.234	4.876	5.579	1.482	2.885	1.24	2.953	2.626	1.738	0.837	1.887	0.175	3.292	2.884	0.094	29.057	6.243	0.23	7.583	4.025
chr9	21967751	21995301	MAPT	442	+	ENSG00000186868	1.43	1.196	0.241	0.291	0.344	0.201	3.183	24.763	33.441	22.338	46.853	50.304	46.251	43.053	24.64	30.089	22.886	20.009	11.904	19.207	2.841	0.023	0.093	0.721	0.504	3.008	0.836	1.06	1.717	0.953	0.419	0.894	1.897	1.721	0.079	0.264	1.268	13.289	0.525	0.188	0.283	13.65	1.908
chr9	22002902	22009363	PRKACA	534	-	ENSG00000072062	30.247	30.31	63.782	34.778	31.265	36.08	26.408	21.008	31.994	20.614	40.059	38.456	37.462	39.732	23.223	39.685	20.957	19.117	17.029	24.101	28.191	13.616	19.123	36.366	36.07	29.943	20.439	32.21	17.193	32.133	33.841	66.817	66.888	19.92	23.056	24.661	20.413	66.118	23.055	52.646	10.528	46.316	25.334
chr15	90229974	90233703	CIB1	572	-	ENSG00000185043	42.996	46.097	111.933	43.737	51.455	38.523	48.1	29.602	29.079	26.731	8.457	10.903	26.315	26.157	24.477	35.645	32.069	26.934	27.775	33.937	51.191	61.591	35.721	47.764	53.368	47.751	103.787	40.15	72.958	40.327	46.557	43.577	43.074	115.469	66.792	63.473	84.572	19.601	42.68	34.836	96.575	79.797	105.843
chr11	111908564	111923722	KLK6	429	-	ENSG00000167755	0.019	0.057	0.016	0.016	0.023	0.018	0.021	13.654	3.796	10.802	3.146	4.131	6.014	4.905	28.761	13.266	6.993	17.471	171.139	49.663	1.098	0	0.115	0.134	0.17	0.023	0.019	0.035	18.474	0.047	0.741	0.019	0	7.518	0.016	0.013	5.625	0.015	2.083	0.053	0.017	0.278	0.046
chr3	41194836	41260096	LRP1	549	+	ENSG00000123384	94.796	73.263	16.707	95.377	73.141	60.415	39.412	19.676	22.474	28.1	40.886	52.879	26.348	21.108	15.306	19.889	28.897	21.428	8.61	16.618	66.645	0.346	149.507	66.474	70.963	36.187	27.355	41.71	20.468	35.943	54.845	33.527	16.896	9.883	38.809	52.798	25.628	5.957	72.109	88.805	5.912	19.898	28.238
chr1	206009263	206023909	NBR1	522	+	ENSG00000188554	29.067	24.79	34.427	32.894	27.514	34.18	39.233	20.949	18.607	22.303	26.355	23.371	20.456	21.061	20.407	19.892	22.483	21.031	26.386	22.238	29.411	16.51	31.082	26.769	31.847	25.881	29.966	28.707	18.185	28.501	29.624	21.003	20.772	22.108	16.803	23.465	27.979	34.557	29.261	33.607	12.716	23.71	30.741
chr1	54849632	54887218	APEX1	535	+	ENSG00000100823	40.115	34.939	50.497	23.247	28.629	27.164	39.628	16.435	18.564	19.754	28.525	29.411	22.764	21.421	16.169	19.342	19.978	16.162	16.633	18.396	42.718	87.16	58.477	37.156	42.562	29.973	38.355	30.026	33.133	28.896	43.226	21.075	18.503	31.405	20.265	33.682	31.902	24.651	32.124	53.466	27.567	24.406	33.979
chr6	170282205	170290473	BAG3	530	+	ENSG00000151929	26.831	40.697	18.126	46.837	34.632	34.06	38.62	20.025	13.774	24.283	29.333	34.748	13.473	11.516	12.277	21.174	22.583	22.129	17.424	19.218	26.762	0.572	27.977	39.737	22.378	44.983	22.727	39.403	48.486	38.203	36.972	56.324	58.387	28.31	9.337	31.706	31.366	167.935	23.732	14.218	7.34	19.429	30.831
chr2	25232975	25342590	AKR7A2	517	-	ENSG00000053371	23.556	22.019	50.183	19.176	18.812	15.336	22	22.601	20.497	23.968	13.965	15.491	18.779	16.853	19.947	20.836	21.574	23.391	16.814	24.115	25.737	29.076	29.538	40.155	38.657	21.545	34.359	21.064	27.056	20.183	23.441	15.908	15.063	43.731	24.414	19.044	19.907	18.021	22.887	36.67	20.575	28.962	25.753
chr20	32762384	32809356	CAPN1	548	+	ENSG00000014216	30.442	26	32.796	30.246	31.83	29.657	66.224	14.807	19.44	16.636	29.987	34.704	28.376	23.997	13.86	19.782	17.12	14.393	8.663	15.557	35.865	43.949	35.797	44.17	39.328	33.691	58.412	37.037	155.148	37.248	38.692	23.874	20.176	48.067	20.469	43.59	68.185	21.056	34.82	31.286	31.246	36.073	55.688
chr4	109912883	110012266	SQSTM1	533	+	ENSG00000161011	46.443	36.171	75.507	44.403	36.727	46.081	56.212	13.64	15.715	14.988	28.482	27.105	18.708	18.458	13.562	16.442	16.007	14.117	14.824	17.005	38.64	20.609	52.104	35.682	43.457	30.671	27.29	35.995	20.988	34.932	33.758	28.791	26.394	34.374	23.373	37.158	37.849	70.798	32.657	34.803	23.776	24.345	30.898
chr7	55019020	55256620	HDAC6	493	+	ENSG00000094631	13.81	12.977	15.226	14.839	13.751	12.304	17.175	11.249	11.603	11.889	32.828	38.048	17.258	12.308	11.074	15.781	10.849	10.936	13.988	13.28	16.419	12.381	5.881	22.1	23.821	18.344	18.819	17.146	12.05	16.101	22.141	10.203	7.18	24.848	25	18.474	13.307	7.835	21.591	29.665	8.849	49.392	23.363
chr15	39934145	40035596	NRD1	510	-	ENSG00000078618	21.468	20.536	22.773	16.046	19.013	18.95	20.753	13.314	13.683	14.895	21.638	20.474	18.507	17.162	14.242	16.765	14.717	13.535	13.176	14.274	21.576	35.662	30.289	23.182	24.286	21.011	18.891	18.52	18.6	18.779	22.821	18.994	19.707	17.895	18.802	23.879	17.089	61.318	28.644	22.814	14.377	30.628	25.048
chr6	151656690	152129619	PTPRS	480	-	ENSG00000105426	28.422	24.802	13.291	10.334	18.462	10.87	24.183	11.319	16.315	9.402	28.463	35.728	20.208	18.173	12.892	14.952	10.096	8.651	7.222	8.481	19.386	0.765	8.033	22.989	21.109	14.736	7.299	17.36	8.408	14.308	27.961	14.453	4.472	6.98	2.067	15.035	9.318	3.482	36.964	21.712	8.209	23.066	22.628
chr14	64084231	64338112	RCAN1	448	-	ENSG00000159200	9.381	13.752	4.326	10.375	9.289	5.978	5.246	14.612	10.213	14.749	12.993	10.67	10.663	12.347	14.504	17.102	15.901	17.029	26.791	18.926	13.45	1.727	10.16	4.446	8.002	9.533	9.362	9.726	3.967	7.511	4.201	6.783	8.045	14.425	18.873	9.992	5.969	5.126	16.418	2.632	3.475	7.082	6.067
chr11	125445749	125496310	CCAR2	490	+	ENSG00000158941	17.594	14.067	20.718	13.273	13.976	14.507	20.54	9.806	13.047	12.106	24.206	24.278	17.975	16.768	9.885	11.668	13.036	9.351	8.812	9.046	18.766	25.205	17.574	18.179	19.297	16.016	18.958	16.805	15.225	16.998	19.886	9.237	9.331	15.068	6.112	18.177	16.078	14.219	19.908	22.598	10.414	20.625	19.565
chr11	49146634	49208670	SIGMAR1	509	-	ENSG00000147955	22.112	22.74	33.399	26.781	27.159	25.531	28.016	11.887	13.208	13.321	16.555	18.192	15.822	14.524	11.886	16.589	13.822	11.37	11.68	11.092	24.437	12.996	45.595	33.883	35.421	22.098	24.786	29.009	26.372	25.965	32.783	14.237	9.039	16.267	65.46	17.546	18.568	4.836	28.703	28.511	16.004	14.582	25.593
chr6	146027645	146437598	SH3PXD2A	474	-	ENSG00000107957	11.41	12.677	5.546	12.047	13.906	14.091	15.172	10.974	8.136	8.081	14.257	17.34	10.814	9.295	12.821	9.477	9.031	9.597	16.144	11.622	10.963	5.403	30.098	35.482	39.766	18.775	13.583	14.097	18.546	12.652	19.921	7.035	6.482	3.668	6.156	12.558	9.771	6.036	40.284	22.937	3.484	12.091	15.211
chr7	77310750	77416400	ATF2	443	-	ENSG00000115966	10.717	9.48	8.367	8.63	8.709	11.064	8.919	8.625	10.32	8.381	18.703	12.506	8.022	13.467	8.722	11.12	8.827	6.785	8.092	7.846	10.391	14.482	8.578	10.943	12.483	8.852	6.813	7.97	4.247	7.708	9.415	4.908	3.39	6.308	5.318	8.291	7.577	3.676	11.355	11.93	4.665	10.209	9.45
chr19	42230185	42242625	S100A9	763	+	ENSG00000163220	71.031	235.262	62.918	52.004	74.603	12.602	56.095	12.709	8.726	11.315	5.244	5.414	11.465	9.269	10.304	12.341	8.071	9.758	12.524	12.457	70.67	4.521	2.971	54.909	34.114	26.872	27.616	39.644	14735.7	51.559	103.441	54.589	37.529	56.259	44.506	599.776	222.01	15.12	19.516	15.144	11.857	15.39	25.092
chr3	119821322	120094417	GSKIP	437	+	ENSG00000100744	5.53	5.434	6.889	6.003	6.133	6.492	6.853	9.021	10.223	11.547	4.924	4.506	7.713	12.076	9.537	9.349	15.383	10.171	8.427	7.711	5.354	11.997	8.457	5.872	4.518	5.952	22.974	4.74	19.208	5.093	4.897	3.519	3.198	6.521	6.704	5.146	6.742	2.411	5.651	2.878	4.042	7.144	8.883
chr14	96378937	96387288	ZMPSTE24	465	+	ENSG00000084073	12.935	13.722	17.488	23.627	15.289	13.843	13.982	9.091	9.173	10.38	6.82	5.686	7.077	10.079	8.812	10.192	10.042	8.845	9.743	10.541	13.258	10.756	20.74	13.182	14.649	14.556	15.145	15.913	12.703	15.037	18.718	9.504	8.546	12.708	10.134	12.112	12.227	5.712	12.748	11.063	6.509	8.575	13.326
chrX	48801376	48824976	ADAM10	448	-	ENSG00000137845	9.764	10.758	6.961	6.764	8.391	7.367	16.193	6.845	5.984	8.104	15.591	12.68	5.312	6.346	7.72	6.75	6.93	7.255	13.222	8.674	10.912	16.593	23.067	8.837	10.784	8.072	9.515	7.164	9.342	6.986	10.334	6.433	5.286	9.261	4.617	12.794	7.501	2.979	18.466	8.805	4.845	8.666	11.733
chr6	26087280	26098343	XRCC1	457	-	ENSG00000073050	11.308	8.371	10.096	10.623	9.658	11.492	12.84	6.146	6.621	8.071	14.701	15.203	8.706	8.086	6.167	8.419	8.227	7.497	6.878	5.72	11.648	15.982	6.543	15.024	14.961	11.734	9.461	11.1	8.019	10.352	12.431	6.103	5.158	9.808	3.365	10.779	9.595	5.401	12.963	17.569	7.23	25.894	11.601
chr3	42784297	42804531	SIRT3	422	-	ENSG00000142082	5.194	4.471	6.707	4.025	4.532	3.923	5.662	6.633	8.639	10.461	9.1	9.622	11.292	9.874	6.664	7.629	11.479	8.936	3.883	5.798	6.646	5.788	4.152	5.813	5.666	4.709	5.879	4.605	3.483	4.646	5.866	6.204	7.203	6.645	6.855	4.96	5.006	4.286	7.244	7.885	4.14	11.744	8.723
chr13	30458746	30617597	GSK3B	425	-	ENSG00000082701	6.201	5.741	8.444	4.712	5.035	5.272	6.55	5.837	8.682	6.754	13.968	10.669	8.243	11.967	6.206	9.529	6.998	5.641	4.515	5.859	6.428	12.414	9.416	6.211	6.379	5.94	6.422	5.193	6.679	5.1	6.455	4.984	5.246	4.717	3.829	7.402	7.493	5.831	5.701	5.479	2.984	6.517	5.48
chr14	102080737	102102085	TARBP2	435	+	ENSG00000139546	6.835	6.746	10.282	4.903	6.5	3.793	7.292	3.894	3.804	4.628	26.55	29.333	4.972	4.164	4.153	4.27	4.841	4.425	4.237	4.122	8.143	9.455	9.372	7.703	8.874	6.4	7.372	5.662	7.419	5.37	7.566	4.002	3.441	12.289	7.734	9.657	8.531	2.765	7.594	7.771	7.495	10.022	11.059
chr5	138554881	138575444	ABCG2	371	-	ENSG00000118777	1.257	1.142	1.306	0.522	0.918	0.432	0.905	7.147	6.334	8.635	3.05	3.235	5.626	5.502	9.391	7.581	5.207	7.783	9.385	11.523	1.493	0.021	0.056	6.947	8.664	0.464	2.228	0.537	0.686	0.432	5.106	0.533	0.296	0.779	2.281	1.281	0.573	0.08	2.442	2.699	0.118	5.853	3.355
chr10	122461524	122514908	LMNA	560	+	ENSG00000160789	74.812	72.423	55.023	97.065	72.656	77.371	50.063	6.018	4.615	6.179	7.994	9.389	5.615	4.449	6.788	8.143	4.879	6.501	9.999	8.76	72.64	34.668	114.067	79.649	59.18	47.914	51.872	59.301	65.864	50.167	77.257	42.661	31.704	37.947	14.578	55.599	50.844	26.393	77.552	57.297	15.334	22.495	42.715
chr10	92451683	92574076	ASCC1	423	-	ENSG00000138303	7.323	5.922	9.781	6.546	6.387	8.177	6.972	6.312	5.269	5.992	7.637	7.49	5.175	5.509	5.673	7.325	5.978	5.609	9.862	7.44	6.764	13.774	7.245	7.215	7.761	5.519	4.399	6.876	4.659	6.666	6.722	6.59	7.175	5.034	3.489	6.032	4.699	5.659	9.486	7.837	5.105	5.704	5.297
chr1	27666060	27672218	FOLH1	354	-	ENSG00000086205	0.093	0.554	0.11	0.204	0.221	0.142	0.285	6.99	1.468	5.6	0.866	1.029	2.601	2.041	10.092	4.37	2.891	8.303	25.481	12.838	0.717	0	0.006	0.338	0.688	0.275	0.187	0.269	0.42	0.228	0.457	0.213	0.033	1.464	3.034	0.686	5.671	0.012	3.518	0.343	0.048	0.05	25.319
chr15	98648970	98964530	PSEN1	419	+	ENSG00000080815	7.552	5.734	6.542	4.744	4.93	4.883	6.317	5.844	3.967	5.901	4.855	4.801	4.795	4.425	7.068	4.992	5.045	6.44	16.695	8.33	6.417	6.466	7.289	6.134	6.352	5.076	9.294	5.02	6.263	5.023	5.751	2.852	2.351	6.065	2.846	7.368	7.219	2.778	7.461	5.719	3.116	4.088	6.064
chr2	112773914	112784590	MTOR	418	-	ENSG00000198793	5.745	5.385	6.834	5.465	5.42	5.825	6.927	4.171	5.419	6.032	10.334	10.957	7.335	6.389	4.282	5.14	5.356	5.207	3.34	4.398	6.217	6.688	5.439	5.551	5.334	7.518	6.727	7.152	5.514	7.668	6.459	4.648	5.218	7.026	4.405	6.008	5.735	6.848	6.842	5.102	3.579	7.825	7.314
chr2	112829750	112836903	AKAP10	424	-	ENSG00000108599	7.965	7.38	8.599	6.348	7.096	7.257	8.591	4.967	5.855	5.873	7.498	7.3	6.861	6.917	4.793	5.165	5.962	4.69	4.599	5.202	7.761	8.528	7.245	7.935	8.293	7.568	6.406	7.326	5.678	7.359	7.774	3.569	2.642	5.802	3.04	7.62	6.245	2.336	8.631	8.009	3.542	5.959	8.192
chr7	22725883	22732002	PRKAA1	465	-	ENSG00000132356	24.087	16.439	11.06	14.86	16.67	19.579	17.721	4.458	4.404	5.525	8.912	7.699	4.114	4.907	5.02	6.665	5.047	4.579	6.573	5.904	20.962	10.66	16.827	14.624	16.785	12.384	15.762	14.016	9.006	12.982	17.5	7.225	6.34	12.012	14.666	15.648	15.808	5.657	16.769	11.102	8.688	7.455	15.571
chr13	110712735	110721074	ABCB1	401	-	ENSG00000085563	1.163	2.508	94.574	0.441	0.95	0.288	1.694	5.16	4.791	6.882	2.3	2.335	4.211	4.809	7.056	6.072	4.003	5.788	7.83	9.225	3.068	0.417	0.025	1.791	4.278	1.22	4.002	1.529	1.053	1.311	3.81	0.259	1.065	6.922	4.945	1.087	0.758	0.089	4.219	1.479	0.554	0.592	2.969
chr11	2159778	2159997	PSEN2	416	+	ENSG00000143801	5.678	5.388	10.49	4.799	4.749	3.952	7.299	3.766	5.068	4.189	8.724	9.666	5.089	5.519	3.715	6.724	4.324	4.019	2.829	4.03	5.666	2.332	3.443	5.26	5.142	7.338	5.939	7.764	4.299	9.254	7.97	4.389	3.998	6.537	3.213	6.351	6.33	5.971	4.077	7.469	13.295	11.07	9.432
chr19	7112254	7294034	INSR	452	-	ENSG00000171105	9.219	9.034	13.651	10.332	8.279	8.932	10.636	3.792	4.094	3.785	9.542	9.731	4.794	4.288	4.19	5.138	3.785	3.651	5.483	4.265	10.589	7.702	2.946	10.015	11.831	10.538	10.765	8.683	2.402	9.251	13.68	8.524	11.768	10.217	13.089	5.496	13.588	8.01	13.344	30.436	29.653	12.34	12.955
chr13	33016068	33066145	SOS1	427	-	ENSG00000115904	12.336	8.844	5.506	9.058	8.536	10.002	11.952	4.044	4.349	5.082	8.684	8.62	4.281	4.516	4.663	4.851	4.505	4.138	4.413	4.229	9.402	5.36	6.421	8.421	9.69	8.14	6.918	9.891	6.174	9.418	8.15	4.094	3.868	4.914	3.384	6.876	6.554	5.437	8.9	12.997	3.233	7.044	9.124
chr19	50819147	50823787	NOTCH1	443	-	ENSG00000148400	13.192	13.792	3.056	6.094	8.174	8.142	12.003	5.641	4.727	6.297	1.288	2.713	5.163	3.385	4.825	4.375	5.173	5.763	4.689	5.376	12.026	9.16	2.461	13.275	12.005	15.158	14.333	12.534	10.361	12.85	10.959	6.206	4.969	9.009	3.876	17.926	7.38	1.813	13.604	3.159	6.173	5.029	13.327
chr19	50958630	50969673	SIRT1	416	+	ENSG00000096717	8.535	7.623	9.633	5.942	6.26	8.672	8.995	3.879	3.068	4.147	9.38	6.953	2.773	3.366	3.695	3.724	4.106	3.951	4.296	3.711	7.812	5.609	5.759	8.356	9.856	8.142	5.708	6.978	3.635	6.743	8.576	3.41	2.475	3.65	3.013	5.752	5.172	4.765	8.728	9.608	3.611	5.124	6.199
chr19	50998952	51001709	OGG1	403	+	ENSG00000114026	4.995	4.732	5.462	4.96	5.239	4.729	6.193	4.007	4.748	4.668	4.935	5.503	4.929	4.476	4.112	3.586	4.378	4.142	3.71	3.577	5.656	5.365	5.756	7.32	7.856	5.426	5.437	5.351	3.072	4.984	6.566	3.145	2.017	8.223	3.817	4.728	4.002	1.348	6.785	8.855	2.217	4.786	6.681
chr12	25215436	25250936	AGER	482	-	ENSG00000204305	4.261	5.353	3.995	3.529	4.418	3.469	5.66	3.132	2.427	2.88	11.351	12.756	2.876	2.072	2.901	3.123	3.048	2.915	3.373	2.858	5.324	7.557	1.99	6.478	8.92	8.676	6.317	6.724	4.418	6.445	9.307	2.612	2.027	8.056	4.342	431.342	4.224	1.059	8.382	8.85	2.395	12.759	13.361
chr1	156082572	156140089	IGF1R	418	+	ENSG00000140443	5.306	4.633	7.62	10.892	7.939	13.39	8.272	3.165	3.547	4.184	6.905	7.532	4.623	4.103	3.146	3.483	4.563	3.564	3.388	3.092	7.92	0.29	6.185	6.149	7.329	8.943	5.486	4.817	4.698	5.969	8.426	4.814	3.87	6.996	0.348	7.308	7.004	1.805	7.41	12.879	6.408	8.061	10.409
chr12	57138458	57213351	BHLHB9	337	+	ENSG00000198908	0.891	0.995	1.375	1.018	0.965	0.957	2.033	3.156	4.74	3.634	7.319	5.2	4.601	6.835	3.065	4.895	4.416	2.703	2.173	2.25	1.139	0.403	0.919	2.255	2.638	1.773	0.841	1.247	0.62	1.235	1.724	1.022	0.719	1.106	0.481	0.763	1.085	0.552	1.354	2.816	0.664	3.82	1.781
chr2	140231422	142131701	EIF2AK4	408	+	ENSG00000128829	7.308	6.732	4.99	4.762	5.819	4.408	7.092	3.467	4.256	4.693	5.36	5.1	4.831	4.615	3.559	4.091	5.144	3.72	2.697	3.452	6.763	11.292	17.516	5.99	6.696	5.132	5.041	4.883	4.232	4.761	7.009	4.032	3.49	4.398	3.372	5.85	5.572	4.053	6.754	6.549	2.934	11.649	6.441
chr17	45894381	46028334	DLL1	436	-	ENSG00000198719	9.71	13.533	3.302	2.887	4.613	1.811	10.539	4.622	3.671	4.429	1.273	1.966	4.826	3.606	4.838	4.739	4.656	4.527	5.528	4.906	13.041	1.733	0.557	13.076	15.247	4.371	11.91	4.727	13.357	3.991	8.308	7.819	4.462	6.336	2.166	8.879	14.131	1.505	4.438	2.241	6.443	5.313	26.178
chr16	89913417	89915140	TM2D1	396	-	ENSG00000162604	4.615	4.723	5.6	7.223	6.152	5.576	5.047	4.033	3.986	4.046	3.731	3.637	3.818	4.655	3.556	4.301	4.087	3.636	4.327	3.995	5.09	4.289	5.824	5.065	5.347	4.511	4.605	4.876	3.479	4.38	5.756	4.064	3.118	4.268	2.18	5.227	4.484	2.422	6.048	6.712	2.495	5.194	5.209
chr16	55389699	55506691	ING1	398	+	ENSG00000153487	5.205	5.851	2.658	4.891	4.286	6.541	5.085	3.124	3.781	3.419	4.559	4.055	3.661	4.399	3.203	3.76	3.305	2.906	3.284	2.848	5.269	7.396	3.551	4.981	5.887	5.608	4.921	4.802	2.79	4.427	6.831	2.729	2.09	3.89	4.148	5.591	3.499	2.133	6.092	10.779	2.35	4.731	5.334
chr11	102835800	102843803	S100A8	673	-	ENSG00000143546	12.939	47.228	12.866	9.745	12.478	2.745	13.1	5.857	3.492	4.277	1.907	1.966	2.914	3.167	3.71	4.206	2.741	3.168	4.571	4.284	12.605	0.856	0.717	13.842	8.9	5.737	4.455	8.108	5632.79	9.468	24.956	14.947	10.245	12.068	13.435	184.569	9.38	3.958	4.084	3.695	2.968	4.407	6.417
chr17	58269855	58280935	GRM1	276	+	ENSG00000152822	0.014	0.01	0.013	0.016	0.018	0.012	0.012	1.17	2.305	1.279	14.829	12.688	1.993	2.986	1.313	1.45	1.153	0.986	0.315	0.695	0.014	0.005	0.013	0.019	0.014	0.01	0.008	0.008	0.004	0.007	0.012	0.024	0.413	0.076	0.004	0.021	0.011	0.004	0.068	0.015	0.01	0.061	0.007
chr1	11106534	11262507	TLR4	390	+	ENSG00000136869	9.908	12.07	5.33	5.5	5.536	2.24	3.715	4.018	3.267	5.024	0.74	1.38	2.946	2.887	2.369	2.774	3.926	3.886	2.643	3.959	8.436	0.118	10.529	1.923	2.888	2.238	2.291	3.127	0.723	2.891	3.438	3.053	2.002	4.256	1.58	9.278	4.52	1.009	3.853	2.493	0.622	1.397	3.019
chr17	43170480	43211689	UCP2	471	-	ENSG00000175567	14.582	25.612	10.601	5.532	10.013	3.493	18.805	2.861	1.619	3.915	0.606	0.679	1.784	1.654	2.839	5.028	2.195	3.323	6.18	4.273	18.562	80.434	0.246	1.983	4.361	4.759	11.254	5.677	2.676	5.093	8.585	2.99	3.841	12.145	1.886	27.309	16.622	24.608	8.632	1.594	2.417	8.119	7.761
chr20	37522357	37523690	ADAM17	376	-	ENSG00000151694	4.582	5.089	3.269	3.386	3.798	2.996	3.756	2.189	2.437	2.597	5.129	5.15	2.716	2.757	2.018	2.399	2.819	1.964	2.207	1.901	4.789	6.4	10.243	3.479	3.756	2.413	2.707	2.574	4.81	2.59	3.095	2.636	1.92	2.272	0.758	7.506	3.488	1.937	5.282	4.94	1.495	1.95	2.27
chr9	136494443	136545862	GSAP	398	-	ENSG00000186088	4.934	4.593	6.143	2.191	2.885	1.838	5.643	2.871	3.007	2.545	1.055	1.485	3.632	3.392	3.127	4.195	2.451	2.098	3.029	2.951	5.181	6.367	1.249	1.98	2.961	6.555	4.406	5.771	3.03	5.923	4.788	2.638	1.94	5.12	5.289	12.789	5.674	1.137	6.77	3.568	3.25	12.686	6.463
chr1	51789567	51878805	EGFR	435	+	ENSG00000146648	16.085	11.043	7.965	7.398	6.947	10.527	9.436	3.061	3.181	4.864	0.825	1.907	3.091	2.697	1.83	1.922	4.168	3.364	0.864	2.371	14.081	0.059	17.165	13.799	10.712	7.146	7.329	12.937	12.504	12.255	9.831	2.665	1.854	4.982	9.631	8.113	13.194	3.221	14.674	7.177	4.712	1.659	10.848
chr3	9749943	9788219	PARK2	320	-	ENSG00000185345	1.588	0.976	2.286	0.876	1.174	1.701	1.574	1.896	3.403	3.526	2.119	2.007	3.727	4.179	2.302	1.973	3.716	2.734	0.79	1.269	1.248	0.008	0.285	0.729	0.915	1.665	0.781	1.719	0.307	1.945	1.045	3.849	3.496	1.981	0.268	0.531	0.625	4.255	1.02	1.227	0.265	1.362	0.765
chr6	161347419	162727771	DNMT3A	372	-	ENSG00000119772	2.68	2.705	4.72	3.272	2.949	2.556	3.841	1.471	1.453	2.123	4.332	4.672	1.742	1.639	1.609	1.906	2.292	1.879	1.89	1.817	3.264	10.11	1.6	4.078	4.271	4.666	4.077	3.959	2.504	3.566	3.618	2.107	1.603	3.119	1.352	3.672	2.966	2.818	3.335	7.251	2.772	5.687	3.903
chr1	7954290	7985505	TP53	444	-	ENSG00000141510	11.719	9.771	9.226	8.215	8.982	8.829	16.204	2.837	2.106	2.964	0.92	1.263	2.358	1.844	2.027	2.388	2.362	2.48	2.224	2.646	13.5	38.057	14.137	13.654	13.089	7.396	11.638	7.488	14.28	6.656	13.496	4.163	3.146	6.651	5.103	8.919	11.251	3.373	11.144	15.078	5.921	4.79	11.498
chr12	79574978	79691097	PPARA	372	+	ENSG00000186951	2.739	2.84	4.197	2.53	3.139	3.745	4.561	2.624	2.504	3.077	0.954	1.448	2.122	2.036	1.849	2.074	2.778	2.366	2.05	2.441	2.451	3.139	2.918	2.41	3.019	3.099	5.407	3.206	2.471	3.642	3.348	4.959	6.064	7.849	12.391	2.144	2.667	5.656	3.219	4.229	2.206	1.952	3.181
chr12	118138038	118145584	IDE	398	-	ENSG00000119912	4.373	3.926	6.675	4.119	4.423	4.382	6.199	1.619	1.558	1.936	3.316	3.307	1.857	1.789	1.636	1.673	1.874	1.583	1.888	1.765	4.28	5.952	5.411	5.533	5.624	5.099	4.669	4.976	5.447	5.786	4.809	4.443	4.427	3.178	3.483	4.224	4.657	8.82	3.995	3.491	4.405	3.265	6.49
chr7	106865277	106907145	PPARGC1A	339	-	ENSG00000109819	0.752	1	1.066	0.156	0.441	0.687	0.65	1.444	2.515	2.016	2.916	2.501	2.436	3.313	1.238	1.59	1.612	1.718	0.53	1.216	0.794	0.011	0.546	1.036	1.954	0.85	3.352	2.267	0.346	2.969	0.895	8.281	6.747	7.68	5.798	1.315	4.75	5.467	0.602	0.27	0.829	2.001	1.321
chr19	9835256	9849682	TSPAN12	401	-	ENSG00000106025	5.426	4.334	30.099	3.156	5.139	9.91	7.02	1.902	2.03	2.952	1.505	1.436	1.479	1.579	1.355	2.204	2.173	2.011	1.172	1.799	4.044	4.702	0.392	2.625	3.956	6.929	8.895	2.289	1.794	2.086	2.548	8.068	9.519	16.468	5.453	12.041	10.494	0.454	2.139	0.704	3.405	5.273	2.989
chr7	95297675	95324707	LRP1B	246	-	ENSG00000168702	0.599	0.338	0.239	0.014	0.049	0.052	0.038	1.939	2.28	1.79	1.609	1.999	1.959	1.901	1.537	1.716	2.032	1.383	1.15	1.713	0.319	0.002	0.073	0.035	0.036	0.1	0.035	0.078	0.022	0.058	0.036	0.071	0.007	0.084	0.018	0.021	0.07	0.373	0.142	0.046	0.026	0.746	0.153
chr22	46150520	46243756	MC1R	341	+	ENSG00000258839	1.401	1.116	1.214	1.461	1.108	0.916	2.358	0.496	0.577	0.9	7.02	8.146	0.802	0.657	0.478	0.914	0.979	0.76	0.631	0.556	1.643	0.447	0.373	1.694	2.416	1.898	1.728	1.689	0.954	1.707	2.481	1.087	0.706	2.246	0.527	1.923	2.931	0.303	2.01	4.025	0.99	8.357	3.005
chr3	12287367	12434356	MMP2	595	+	ENSG00000087245	236.15	132.636	31.381	134.753	100.688	65.39	107.814	1.083	0.909	1.292	0.337	0.422	0.763	0.643	1.104	1.182	0.913	1.275	1.878	1.157	162.141	0.241	407.73	230.245	326.29	64.957	59.318	99.29	30.154	67.557	118.891	68.274	29.812	22.667	3.344	138.63	59.489	11.024	83.489	135.378	13.422	6.373	58.78
chr4	23755040	23899318	UCP3	338	-	ENSG00000175564	0.555	0.546	0.692	0.446	0.582	0.449	0.658	0.482	0.463	0.662	2.351	2.649	0.794	0.534	0.535	0.529	0.641	0.592	0.401	0.45	0.634	0.322	0.283	0.456	0.84	0.735	0.67	0.796	0.346	0.79	0.958	0.483	0.528	0.697	0.338	0.711	0.714	67.365	1.011	0.556	0.305	1.381	1.066
chr2	68178856	68256237	PPARG	409	+	ENSG00000132170	47.216	47.178	1.464	1.495	4.455	1.382	22.368	0.724	1.067	0.584	1.189	1.039	1.011	1.047	0.849	0.619	0.866	0.472	0.731	0.551	31.265	0.147	6.449	4.948	2.246	2.218	16.737	1.589	2.178	1.379	3.101	3.062	3.278	5.258	2.156	7.522	2.182	1.013	5.306	6.63	0.599	0.176	2.365
chr5	40759378	40798374	PAWR	395	-	ENSG00000177425	4.765	4.307	2.421	8.635	11.062	11.132	7.839	0.999	0.66	1.059	0.54	0.484	0.45	0.474	0.848	1.181	1.15	0.834	0.656	1.381	6.958	3.247	2.712	8.172	9.147	3.377	5.928	5.214	4.824	6.411	10.991	1.603	1.001	4.466	3.084	5.249	5.949	0.317	5.418	8.897	2.717	4.632	7.341
chr19	14091687	14118084	BACE2	395	+	ENSG00000182240	8.317	5.617	1.337	13.547	10.732	10.375	5.002	0.529	0.495	0.474	0.152	0.242	0.606	0.526	0.701	0.674	0.392	0.466	3.828	1.421	7.901	0.309	5.04	5.363	7.648	5.27	5.233	4.55	6.081	4.969	6.36	3.9	1.369	6.678	0.452	4.054	20.062	0.902	8.892	2.069	6.312	1.478	10.9
chr20	4686235	4701590	KRAS	303	-	ENSG00000133703	1.435	1.47	1.011	1.032	1.095	1.422	2.326	0.656	0.897	0.713	1.497	0.983	0.665	1.149	0.618	0.871	0.72	0.447	0.634	0.591	1.295	2.83	1.959	1.219	1.024	1.22	1.911	1.471	2.798	1.655	1.411	0.712	0.501	0.813	0.559	1.763	1.678	0.607	1.836	1.022	0.787	0.694	0.995
chr14	73136417	73223691	TRDMT1	261	-	ENSG00000107614	0.776	0.665	0.603	0.983	0.918	1.006	0.59	0.462	0.441	0.702	1.665	1.867	0.428	0.437	0.462	0.55	0.591	0.55	0.466	0.397	0.885	0.515	0.722	0.877	0.954	0.557	0.477	0.53	0.336	0.467	1.068	0.428	0.334	0.456	0.131	0.675	0.558	0.259	1.625	1.477	0.401	0.661	0.71
chr1	226870183	226896105	PTGS2	311	-	ENSG00000073756	0.691	3.632	0.76	2.163	2.279	2.348	4.434	0.579	0.853	0.418	0.106	0.138	0.821	1.014	0.59	0.627	0.317	0.355	1.892	0.779	0.691	0.054	0.845	0.323	1.055	6.714	2.142	2.105	0.474	1.377	2.858	2.596	0.14	1.423	0.664	8.005	0.439	0.055	0.521	0.522	0.086	1.77	6.25
chr1	186671790	186680427	DNMT3B	273	+	ENSG00000088305	0.583	0.416	0.502	0.344	0.448	0.257	1.528	0.391	0.472	0.299	2.122	2.196	0.538	0.455	0.316	0.496	0.275	0.233	0.291	0.304	0.852	0.255	0.811	0.762	0.87	0.493	0.561	0.39	0.485	0.36	0.493	0.324	0.367	1.146	0.458	0.484	0.736	0.118	1.241	0.741	2.604	0.585	0.678
chr19	5158494	5340803	BRCA1	286	-	ENSG00000012048	0.644	0.525	0.573	0.424	0.495	0.391	0.797	0.671	0.386	0.746	0.291	0.353	0.51	0.462	0.72	0.632	0.555	0.769	1.221	0.931	0.623	8.307	2.034	0.702	0.727	0.926	0.989	0.743	1.24	0.767	0.745	0.762	0.673	0.394	0.642	0.757	0.598	0.466	0.961	0.638	0.367	1.005	0.634
chr21	34513141	34615142	CDKN2B	374	-	ENSG00000147883	9.089	6.652	1.553	1.222	2.124	1.861	3.021	1.089	0.603	0.813	0.194	0.414	0.662	0.709	0.719	0.526	0.448	0.762	0.766	0.497	5.514	0.068	4.574	1.266	1.034	1.222	12.469	1.582	24.979	2.22	1.479	0.416	0.448	0.418	0.215	6.57	2.616	2.274	2.599	0.628	0.489	3.589	2.252
chr3	39406688	39412542	ABCC4	330	-	ENSG00000125257	1.066	1.187	0.427	0.68	1.067	0.635	12.043	0.704	0.477	0.523	0.096	0.097	0.45	0.399	0.635	0.955	0.505	0.346	1.285	0.959	0.881	8.083	4.827	0.794	2.175	4.934	4.249	0.991	0.789	1.145	2.162	0.792	0.573	4.372	0.249	3.658	0.797	1.393	0.819	2.13	0.701	0.82	7.672
chr1	153390031	153391188	WNT1	180	+	ENSG00000125084	0.029	0.058	0.016	0.024	0.034	0	0.032	0.163	0.37	1.081	0	0	1.135	0.688	0.22	0.127	2.821	0.67	0.029	0.021	0.048	0.042	0	0.053	0.032	0.015	0.111	0.014	0.052	0.016	0.092	0.04	0	0	0.021	0.115	0.114	0	0.027	0	0.016	0.296	0.074
chr1	153357853	153361027	KL	275	+	ENSG00000133116	2.516	1.937	0.152	0.313	0.47	0.267	1.035	0.368	0.293	1.286	0.068	0.082	0.177	0.232	0.677	0.475	1.969	0.927	0.242	0.258	1.869	0.97	0.007	0.583	0.647	1.561	0.669	0.777	0.192	1.045	0.641	0.382	0.347	7.335	0.043	2.328	0.478	0.23	1.342	0.102	0.245	0.305	2.144
chr10	103588527	103855543	MPO	253	-	ENSG00000005381	0.126	0.19	0.092	0.203	0.133	0.035	0.098	0.42	0.685	0.505	0.394	0.503	0.868	0.813	0.436	0.61	0.427	0.553	0.235	0.499	0.194	0.02	0.004	0.039	0.049	0.121	0.063	0.112	0.043	0.126	0.18	0.219	0.108	0.12	0.252	2.413	1.242	0.304	0.055	0.044	0.053	1.085	0.162
chr9	34634721	34637809	CAPN9	275	+	ENSG00000135773	0.018	0.024	0.477	0.048	0.064	0.039	0.549	0.53	0.335	0.434	0.345	0.406	0.394	0.35	0.584	0.368	0.359	0.432	1.354	0.681	0.109	0	0.01	0.023	0.097	0.092	7.749	0.052	0.02	0.044	0.084	0.187	0.083	0.055	0.01	2.471	5.665	0.062	0.27	0.099	0.031	0.047	0.318
chr10	67884668	67918390	IL1B	278	-	ENSG00000125538	0.08	1.149	0.36	0.401	0.547	0.09	0.591	0.509	0.219	0.358	0.099	0.095	0.282	0.294	0.434	0.64	0.296	0.248	1.555	0.711	0.146	1.151	0.117	0.237	0.765	0.177	0.626	0.061	0.742	0.062	1.734	0.225	0.092	0.506	0.29	2.967	0.531	0.015	0.209	0.13	0.236	0.636	0.391
chr11	215457	236431	HFE	319	+	ENSG00000010704	1.947	1.987	4.636	2.093	2.081	1.568	3.094	0.48	0.394	0.578	0.113	0.23	0.333	0.339	0.398	0.315	0.515	0.427	0.633	0.535	2.287	0.95	4.743	1.783	2.52	2.166	2.104	1.836	1.511	1.671	2.184	1.345	0.747	1.563	1.931	1.695	2.327	0.285	2.07	2.421	1.417	0.523	2.672
chr4	89724098	89838315	ADAM12	256	-	ENSG00000148848	2.407	1.894	0.072	0.165	0.296	0.107	0.585	0.322	0.213	1.147	0.216	0.297	0.223	0.179	0.278	0.362	0.657	0.598	0.316	0.341	2.378	0.021	10.128	0.896	1.229	0.111	0.114	0.107	0.109	0.083	0.147	0.136	0.063	0.415	0.03	0.455	0.337	0.018	0.139	3.48	0.042	0.456	0.183
chr10	86958617	86963260	PON1	340	-	ENSG00000005421	0.053	0.089	2.483	0.005	0.032	0.011	0.041	0.474	0.321	0.463	0.146	0.247	0.242	0.2	0.262	0.419	0.382	0.296	0.105	0.315	0.108	0	0	0.062	0.073	0.035	0.059	0.028	0.014	0.023	0.143	0.082	0.04	0.076	100.305	0.204	0.098	0.018	0.098	0.606	0.087	1.039	0.107
chr21	31659621	31668931	IL6	297	+	ENSG00000136244	2.42	15.755	0.35	2.267	1.956	0.358	0.292	0.257	0.22	0.207	0.062	0.074	0.215	0.161	0.223	0.326	0.212	0.228	0.396	0.31	3.101	0.071	2.845	0.179	0.284	1.709	0.462	1.367	0.299	1.096	4.805	1.753	0.408	0.282	0.074	6.052	0.894	0.251	1.568	0.161	0.156	0.925	0.471
chr2	38981395	39124345	CDKN2A	242	-	ENSG00000147889	0.175	0.191	1.315	0.381	0.416	0.245	0.375	0.3	0.148	0.26	0.091	0.233	0.28	0.24	0.199	0.101	0.122	0.331	0.259	0.158	0.319	2.245	2.356	0.216	0.204	0.225	0.183	0.256	0.786	0.391	0.37	0.032	0.033	0.048	0.061	0.33	0.251	0.024	0.337	0.104	0.104	6.708	0.321
chr5	179807323	179833782	EGF	281	+	ENSG00000138798	0.013	0.016	0.051	0.014	0.032	0.015	0.375	0.158	0.28	0.133	0.014	0.023	0.32	0.309	0.207	0.234	0.152	0.076	0.121	0.196	0.784	0.011	0.028	0.027	0.03	0.113	0.255	0.091	0.107	0.157	0.208	1.561	1.421	9.807	0.008	0.504	2.449	10.788	0.047	0.016	13.19	0.239	0.667
chr16	680223	681603	ESR1	347	+	ENSG00000091831	0.852	0.656	0.564	0.89	0.84	0.898	0.971	0.085	0.078	0.108	0.375	0.572	0.121	0.082	0.082	0.235	0.133	0.061	0.091	0.072	2.459	0.045	0.126	17.237	25.805	0.207	0.153	0.291	0.124	0.24	11.999	0.377	0.207	0.504	2.083	0.654	0.247	0.267	0.766	3.027	0.15	3.131	2.194
chr12	53500920	53506431	CCR5	225	+	ENSG00000160791	0.349	0.555	0.412	0.31	0.491	0.127	0.487	0.119	0.06	0.125	0.029	0.022	0.046	0.059	0.119	0.187	0.102	0.104	0.579	0.3	0.229	0.047	0	0.304	0.437	0.276	0.578	0.23	0.415	0.298	0.633	0.155	0.095	0.293	0.259	1.664	0.622	0.026	0.36	0.16	0.177	0.242	0.539
chrX	154295670	154330350	IL1A	215	-	ENSG00000115008	0	0.051	0.02	0	0	0	1.192	0.135	0.076	0.103	0.023	0.019	0.084	0.078	0.099	0.185	0.075	0.069	0.368	0.207	0.016	2.381	0.037	0	0.044	0.014	0.021	0.018	4.126	0.039	0.038	0	0	0.022	0	0.606	0.048	0	0.022	0	0.007	0.086	0.013
chr9	117704331	117716871	WT1	364	-	ENSG00000184937	0	11.229	0.069	0.022	0.396	0	0.041	0.008	0.011	0.429	0.007	0.029	0.017	0.018	0.01	0.012	0.325	0.313	0	0.007	0.009	0.069	0	9.268	7.554	0.173	0.041	0.18	0	0.109	28.852	1.36	0.711	4.911	0.024	0.05	0	0	0	22.229	0.031	0	0.128
chr1	61681045	61725423	ESR2	207	-	ENSG00000140009	0.297	0.249	1.91	0.087	0.083	0.054	0.557	0.042	0.055	0.052	0.272	0.284	0.057	0.049	0.043	0.083	0.069	0.038	0.048	0.051	0.32	1.007	0.019	0.211	0.349	0.064	0.194	0.097	0.218	0.087	0.374	0.079	0.131	0.399	0.083	0.22	0.258	0.162	0.191	1.777	0.191	0.351	0.447
chr6	31575566	31578336	PIK3CG	225	+	ENSG00000105851	0.484	0.537	0.244	0.236	0.359	0.113	0.362	0.067	0.083	0.067	0.015	0.012	0.068	0.069	0.068	0.089	0.05	0.042	0.242	0.147	0.34	1.897	0	0.189	0.336	0.179	0.476	0.174	0.147	0.169	0.257	0.118	0.105	0.148	0.084	0.929	0.361	0.031	0.238	0.206	0.076	0.12	0.222
chr17	7661778	7677434	TKTL1	326	+	ENSG00000007350	0.094	0.131	0.037	0.037	0.038	0.022	0.031	0.067	0.062	0.131	0.012	0.014	0.044	0.047	0.044	0.066	0.108	0.093	0.123	0.059	0.097	0.015	0	0.021	0.046	0.025	0.027	0.028	0.012	0.031	0.063	0.996	1.538	0.041	0.037	0.187	0.028	0.046	0.05	0.034	0.01	0.495	0.058
chr10	17142253	17202054	TNF	312	+	ENSG00000232810	0.091	0.509	0.43	0.164	0.212	0.023	0.105	0.041	0.03	0.063	0.031	0.029	0.061	0.054	0.043	0.05	0.045	0.056	0.114	0.09	0.222	58.119	0.038	0.055	0	0.199	0.386	0.125	0.335	0.161	0.244	0.2	0.224	0.56	0.176	1.085	0.158	0.035	0.034	0.035	0.096	0.091	0.098
chr7	120787321	120858402	AKAP2	198	+	ENSG00000241978	0.725	0.843	0.073	0.368	0.45	0.61	0.308	0.04	0.041	0.048	0.014	0.02	0.029	0.039	0.045	0.05	0.025	0.051	0.064	0.076	0.55	1.304	2.634	0.328	0.409	0.331	0.197	0.346	0.056	0.386	0.255	0.247	0.201	0.188	0.021	0.557	0.156	0.059	0.268	0.124	0.039	0.053	0.13
chr4	41256412	41268455	MMP3	366	-	ENSG00000149968	2.868	0.058	0.04	0.305	0.044	0.311	0.747	0.023	0.095	0.018	0.014	0.02	0.039	0.042	0.043	0.084	0.011	0.019	0.02	0.014	4.817	0.02	10.453	0.059	0.023	0.581	0.489	0.263	0.045	0.319	0.081	0.023	0.021	0.079	0.033	0.088	115.688	1.67	13.484	0.026	0.059	0.052	0.285
chr11	73974666	73983307	KLK1	490	-	ENSG00000167748	0.069	0.457	0.941	0.074	0.141	0.034	0.119	0.027	0.021	0.043	0.016	0.037	0.034	0.016	0.066	0.016	0.038	0.031	0.019	0.013	0.206	23.603	0.045	0.113	0.091	0.168	22.62	0.11	0.707	0.114	0.116	0.09	0.135	2.317	0.06	0.272	4.65	0.034	0.284	0.118	784.985	0.098	1.717
chr11	74000280	74009435	INS	518	-	ENSG00000254647	0	0	0.18	0.062	0	0	0.079	0	0	0	0	0	0	0	0	0.085	0	0	0	0.259	0.071	0	0	0.231	0	0	0	0	0.065	0.062	0.183	0	0	0	0.14	0	0	0	0	0	1315.63	0	0.093
chr12	48978614	48981676	KLK8	342	-	ENSG00000129455	0	0.913	0	0	0	0	0.028	0	0	0	0.067	0.216	0	0	0	0	0	0	0.03	0	0.931	0	0.044	0.649	0.066	0	0	0.024	34.023	0.025	1.029	0	0	0.07	0	0	1.243	0	0.319	0.029	0	0.064	0
chr11	32387774	32435630	APOB	406	-	ENSG00000084674	0.27	0.338	0.018	1.102	0.38	0.79	0.168	0.015	0.028	0.018	0.005	0.014	0.032	0.024	0.024	0.036	0.018	0.014	0.035	0.048	0.202	0.004	0.488	0.087	0.167	0.139	0.068	0.258	0.031	0.272	0.119	2.596	1.571	0.055	206.518	0.055	0.052	0.045	0.17	0.086	0.043	0.057	0.094
chr19	43543039	43580473	CASR	170	+	ENSG00000036828	0	0	0.009	0	0	0	0.058	0	0	0	0	0	0	0	0.01	0.069	0.006	0	0.007	0.016	0	0.213	0	0.01	0	0.009	0.035	0	0.008	0	0.005	0	0	4.356	0.063	0.007	0	0	0	0.158	3.877	0.086	0.016
chr1	40258106	40294184	CTSE	373	-	ENSG00000196188	0.009	0.032	0.011	0.014	0.014	0	2.127	0.012	0.01	0	0.012	0.017	0.012	0.008	0	0	0	0	0	0	0.011	0.009	0	0.024	0.031	0.024	2.114	0.015	0.032	0.013	0.047	0.016	0.002	0.113	0.038	17.462	0	0	0	0.017	0.576	0.625	0.039
[truncated: 10 more columns]
