# Supplementary material for: Candidate Genes and MiRNAs Linked to the Inverse Relationship Between Cancer and Alzheimer’s Disease: Insights From Data Mining and Enrichment Analysis
Source: Front Genet. 2019 Sep 24;10:846. doi: 10.3389/fgene.2019.00846 (PMC6771301; doi:10.3389/fgene.2019.00846)
Supplement: Table S3 — The HPA annotation of 138 ALZCAN genes for both normal and cancer human. The table includes the following columns: gene name, ensembl ID, protein class, prognostic p-value, prognostic gene flag, cancer tissues (protein level detection), normal tissues (manual protein level detection), RNA cancer category (HPA classification) RNA tissue category (HPA classification). [file Table_3.xlsx]

## Sheet: Table S2
Gene	Ensembl	Protein class	Prognostic p-value	Prognostic gene Flag	Cancer tissues ( detection at protein level)	Normal tissues ( detection at protein level)	RNA cancer category (HPA)	RNA tissue category (HPA)
ABCB1	ENSG00000085563	Cancer-related genes, CD markers, Disease related genes, Enzymes, Plasma proteins, Potential drug targets, Predicted intracellular proteins, Predicted membrane proteins, Transporters	Renal cancer:2.95e-4 (favourable), Pancreatic cancer:3.33e-4 (favourable)	yes	detected in cancers	detected in normal tissues	Tissue enhanced	Tissue enhanced
ABCC4	ENSG00000125257	Plasma proteins, Predicted membrane proteins, Transporters	Renal cancer:2.25e-10 (favourable), Endometrial cancer:9.89e-4 (unfavourable)	yes	detected in cancers	detected in normal tissues	Tissue enriched	Tissue enhanced
ABCG2	ENSG00000118777	Cancer-related genes, CD markers, Predicted intracellular proteins, Predicted membrane proteins		no	detected in cancers	detected in normal tissues	Mixed	Tissue enhanced
ADAM10	ENSG00000137845	Cancer-related genes, CD markers, Disease related genes, Enzymes, Plasma proteins, Potential drug targets, Predicted membrane proteins, Predicted secreted proteins, Transporters	Lung cancer:8.46e-5 (unfavourable), Pancreatic cancer:1.90e-4 (unfavourable)	yes	detected in cancers	detected in normal tissues	Expressed in all	Expressed in all
ADAM12	ENSG00000148848	Predicted membrane proteins, Predicted secreted proteins, Transporters	Renal cancer:2.39e-14 (unfavourable)	yes	detected in cancers	detected in normal tissues	Mixed	Tissue enriched
ADAM17	ENSG00000151694	CD markers, Disease related genes, Enzymes, Potential drug targets, Predicted membrane proteins, Predicted secreted proteins, Transporters	Urothelial cancer:4.23e-5 (unfavourable)	yes	detected in cancers	detected in normal tissues	Expressed in all	Expressed in all
ADRA2B	ENSG00000274286	Predicted membrane proteins		no	detected in cancers	detected in normal tissues	Mixed	Mixed
AGER	ENSG00000204305	Cancer-related genes, Plasma proteins, Predicted membrane proteins, Predicted secreted proteins	Renal cancer:9.01e-7 (unfavourable), Urothelial cancer:2.74e-6 (favourable), Pancreatic cancer:3.41e-4 (favourable)	yes	detected in cancers	detected in normal tissues	Expressed in all	Tissue enriched
AKAP10	ENSG00000108599	Disease related genes, Plasma proteins, Predicted intracellular proteins, Predicted secreted proteins		no	detected in cancers	detected in normal tissues	Expressed in all	Expressed in all
AKAP2	ENSG00000241978	Predicted intracellular proteins		no	NA	NA	Not detected	Expressed in all
AKR7A2	ENSG00000053371	Enzymes, Plasma proteins, Predicted intracellular proteins	Renal cancer:2.67e-4 (favourable), Urothelial cancer:8.59e-4 (unfavourable)	yes	detected in cancers	detected in normal tissues	Expressed in all	Expressed in all
ALDH2	ENSG00000111275	Cancer-related genes, Enzymes, FDA approved drug targets, Plasma proteins, Predicted intracellular proteins	Liver cancer:3.95e-7 (favourable), Renal cancer:5.24e-6 (favourable), Endometrial cancer:2.63e-4 (favourable), Urothelial cancer:7.71e-4 (unfavourable)	yes	detected in cancers	detected in normal tissues	Expressed in all	Expressed in all
APEX1	ENSG00000100823	Cancer-related genes, Enzymes, FDA approved drug targets, Plasma proteins, Predicted intracellular proteins	Liver cancer:7.82e-5 (unfavourable)	yes	detected in cancers	detected in normal tissues	Expressed in all	Expressed in all
APOB	ENSG00000084674	Candidate cardiovascular disease genes, Disease related genes, Plasma proteins, Predicted secreted proteins		no	detected in cancers	detected in normal tissues	Tissue enriched	Group enriched
APOC1	ENSG00000130208	Cancer-related genes, Candidate cardiovascular disease genes, Plasma proteins, Predicted secreted proteins	Liver cancer:1.15e-7 (favourable)	yes	detected in cancers	detected in normal tissues	Tissue enriched	Tissue enriched
APOE	ENSG00000130203	Cancer-related genes, Candidate cardiovascular disease genes, Disease related genes, Plasma proteins, Predicted secreted proteins		no	detected in cancers	detected in normal tissues	Expressed in all	Expressed in all
APP	ENSG00000142192	Disease related genes, FDA approved drug targets, Plasma proteins, Predicted intracellular proteins, Predicted membrane proteins, Transporters	Renal cancer:2.79e-6 (favourable)	yes	detected in cancers	detected in normal tissues	Expressed in all	Expressed in all
ASCC1	ENSG00000138303	Disease related genes, Plasma proteins, Predicted intracellular proteins	Pancreatic cancer:2.00e-4 (unfavourable), Liver cancer:3.52e-4 (unfavourable)	yes	detected in cancers	detected in normal tissues	Expressed in all	Expressed in all
ATF2	ENSG00000115966	Enzymes, Predicted intracellular proteins, Transcription factors	Liver cancer:7.08e-5 (unfavourable)	yes	detected in cancers	detected in normal tissues	Expressed in all	Expressed in all
ATP2A2	ENSG00000174437	Disease related genes, Enzymes, Plasma proteins, Potential drug targets, Predicted intracellular proteins, Predicted membrane proteins, Transporters		no	detected in cancers	detected in normal tissues	Expressed in all	Expressed in all
BACE2	ENSG00000182240	Enzymes, Predicted membrane proteins, Predicted secreted proteins	Cervical cancer:1.11e-4 (unfavourable), Glioma:8.13e-4 (unfavourable)	yes	detected in cancers	detected in normal tissues	Expressed in all	Mixed
BAG3	ENSG00000151929	Disease related genes, Plasma proteins, Predicted intracellular proteins		no	detected in cancers	detected in normal tissues	Expressed in all	Expressed in all
BECN1	ENSG00000126581	Predicted intracellular proteins		no	detected in cancers	detected in normal tissues	Expressed in all	Expressed in all
BHLHB9	ENSG00000198908	Predicted intracellular proteins		no	NA	NA	Expressed in all	Tissue enhanced
BIN1	ENSG00000136717	Disease related genes, Predicted intracellular proteins		no	detected in cancers	detected in normal tissues	Expressed in all	Group enriched
BRCA1	ENSG00000012048	Cancer-related genes, Disease related genes, Enzymes, Plasma proteins, Potential drug targets, Predicted intracellular proteins		no	detected in cancers	detected in normal tissues	Expressed in all	Mixed
BSG	ENSG00000172270	Blood group antigen proteins, CD markers, Predicted intracellular proteins, Predicted membrane proteins, Predicted secreted proteins, Transporters	Renal cancer:1.95e-6 (favourable), Liver cancer:5.48e-6 (unfavourable), Endometrial cancer:2.59e-4 (favourable)	yes	detected in cancers	detected in normal tissues	Expressed in all	Expressed in all
CAPN1	ENSG00000014216	Disease related genes, Enzymes, Plasma proteins, Potential drug targets, Predicted intracellular proteins	Renal cancer:7.06e-8 (favourable), Pancreatic cancer:4.30e-4 (unfavourable)	yes	detected in cancers	detected in normal tissues	Expressed in all	Expressed in all
CAPN9	ENSG00000135773	Enzymes, Predicted intracellular proteins		no	detected in cancers	detected in normal tissues	Mixed	Tissue enhanced
CASR	ENSG00000036828	Disease related genes, FDA approved drug targets, G-protein coupled receptors, Plasma proteins, Predicted membrane proteins, Transporters		no	detected in cancers	detected in normal tissues	Tissue enriched	Tissue enriched
CCAR2	ENSG00000158941	Predicted intracellular proteins	Renal cancer:5.60e-4 (favourable)	yes	detected in cancers	detected in normal tissues	Expressed in all	Expressed in all
CCR5	ENSG00000160791	CD markers, Disease related genes, FDA approved drug targets, G-protein coupled receptors, Predicted membrane proteins	Endometrial cancer:7.42e-5 (favourable), Head and neck cancer:9.33e-5 (favourable)	yes	NA	NA	Expressed in all	Mixed
CDKN2A	ENSG00000147889	Cancer-related genes, Disease related genes, Plasma proteins, Predicted intracellular proteins, Predicted secreted proteins	Endometrial cancer:1.82e-7 (unfavourable), Renal cancer:5.76e-7 (unfavourable), Liver cancer:2.17e-4 (unfavourable), Head and neck cancer:5.19e-4 (favourable)	yes	detected in cancers	detected in normal tissues	Expressed in all	Mixed
CDKN2B	ENSG00000147883	Predicted intracellular proteins	Endometrial cancer:4.47e-6 (unfavourable), Renal cancer:1.03e-4 (unfavourable), Liver cancer:1.49e-4 (unfavourable)	yes	detected in cancers	detected in normal tissues	Expressed in all	Mixed
CIB1	ENSG00000185043	Predicted intracellular proteins	Endometrial cancer:2.26e-5 (favourable)	yes	detected in cancers	detected in normal tissues	Expressed in all	Expressed in all
CRYAB	ENSG00000109846	Cancer-related genes, Disease related genes, Predicted intracellular proteins, Predicted membrane proteins	Urothelial cancer:1.70e-5 (unfavourable), Colorectal cancer:4.90e-5 (unfavourable)	yes	detected in cancers	detected in normal tissues	Group enriched	Tissue enhanced
CTNNB1	ENSG00000168036	Cancer-related genes, Disease related genes, Plasma proteins, Predicted intracellular proteins	Colorectal cancer:7.54e-4 (favourable)	yes	detected in cancers	detected in normal tissues	Expressed in all	Expressed in all
CTSE	ENSG00000196188	Enzymes, Predicted secreted proteins	Urothelial cancer:5.26e-5 (favourable)	yes	detected in cancers	detected in normal tissues	Group enriched	Group enriched
DHCR24	ENSG00000116133	Disease related genes, Enzymes, Potential drug targets, Predicted intracellular proteins, Predicted membrane proteins	Endometrial cancer:1.05e-5 (unfavourable)	yes	detected in cancers	detected in normal tissues	Expressed in all	Expressed in all
DLL1	ENSG00000198719	Predicted membrane proteins, Predicted secreted proteins		no	NA	NA	Expressed in all	Mixed
DNMT3A	ENSG00000119772	Cancer-related genes, Disease related genes, Enzymes, Plasma proteins, Potential drug targets, Predicted intracellular proteins, Transcription factors	Pancreatic cancer:1.18e-4 (favourable), Endometrial cancer:1.55e-4 (unfavourable), Liver cancer:1.58e-4 (unfavourable), Renal cancer:2.49e-4 (unfavourable)	yes	detected in cancers	detected in normal tissues	Expressed in all	Expressed in all
DNMT3B	ENSG00000088305	Disease related genes, Enzymes, Potential drug targets, Predicted intracellular proteins, Transcription factors	Renal cancer:1.87e-7 (unfavourable), Endometrial cancer:5.04e-4 (unfavourable)	yes	detected in cancers	detected in normal tissues	Tissue enriched	Tissue enhanced
EGF	ENSG00000138798	Cancer-related genes, Disease related genes, FDA approved drug targets, Plasma proteins, Predicted membrane proteins, RAS pathway related proteins		no	NA	NA	Mixed	Tissue enriched
EGFR	ENSG00000146648	Cancer-related genes, Disease related genes, Enzymes, FDA approved drug targets, Plasma proteins, Predicted intracellular proteins, Predicted membrane proteins, Predicted secreted proteins, RAS pathway related proteins	Urothelial cancer:2.04e-5 (unfavourable)	yes	detected in cancers	detected in normal tissues	Expressed in all	Tissue enhanced
EIF2AK4	ENSG00000128829	Disease related genes, Enzymes, Potential drug targets, Predicted intracellular proteins		no	detected in cancers	detected in normal tissues	Expressed in all	Expressed in all
ESR1	ENSG00000091831	Cancer-related genes, Disease related genes, FDA approved drug targets, Nuclear receptors, Predicted intracellular proteins, Transcription factors	Endometrial cancer:5.47e-7 (favourable)	yes	detected in cancers	detected in normal tissues	Group enriched	Group enriched
ESR2	ENSG00000140009	Cancer-related genes, FDA approved drug targets, Nuclear receptors, Predicted intracellular proteins, Transcription factors		no	detected in cancers	detected in normal tissues	Not detected	Tissue enhanced
FEZ1	ENSG00000149557	Predicted intracellular proteins	Renal cancer:2.16e-6 (unfavourable), Cervical cancer:9.06e-5 (unfavourable)	yes	NA	NA	Tissue enriched	Tissue enriched
FOLH1	ENSG00000086205	Cancer-related genes, Enzymes, FDA approved drug targets, Plasma proteins, Predicted intracellular proteins, Predicted membrane proteins	Renal cancer:1.30e-6 (unfavourable), Endometrial cancer:5.24e-5 (favourable), Liver cancer:4.25e-4 (favourable)	yes	detected in cancers	detected in normal tissues	Tissue enriched	Group enriched
GRM1	ENSG00000152822	Disease related genes, G-protein coupled receptors, Plasma proteins, Potential drug targets, Predicted membrane proteins, Transporters		no	detected in cancers	detected in normal tissues	Not detected	Group enriched
GSAP	ENSG00000186088	Predicted intracellular proteins	Urothelial cancer:4.15e-5 (favourable), Breast cancer:3.36e-4 (favourable), Renal cancer:3.51e-4 (unfavourable)	yes	NA	NA	Expressed in all	Mixed
GSK3A	ENSG00000105723	Cancer-related genes, Enzymes, Predicted intracellular proteins	Liver cancer:1.13e-4 (unfavourable), Endometrial cancer:4.02e-4 (unfavourable)	yes	detected in cancers	detected in normal tissues	Expressed in all	Expressed in all
GSK3B	ENSG00000082701	Enzymes, Predicted intracellular proteins	Liver cancer:8.20e-5 (unfavourable), Renal cancer:1.52e-4 (favourable)	yes	detected in cancers	detected in normal tissues	Expressed in all	Expressed in all
GSKIP	ENSG00000100744	Predicted intracellular proteins		no	detected in cancers	detected in normal tissues	Expressed in all	Expressed in all
HDAC6	ENSG00000094631	Disease related genes, Enzymes, FDA approved drug targets, Predicted intracellular proteins	Urothelial cancer:3.34e-4 (favourable)	yes	detected in cancers	detected in normal tissues	Expressed in all	Expressed in all
HFE	ENSG00000010704	Disease related genes, Predicted membrane proteins		no	detected in cancers	detected in normal tissues	Expressed in all	Mixed
HIGD1A	ENSG00000181061	Predicted membrane proteins	Renal cancer:3.99e-8 (favourable), Colorectal cancer:2.12e-4 (favourable)	yes	detected in cancers	detected in normal tissues	Expressed in all	Expressed in all
HMGB1	ENSG00000189403	Plasma proteins, Predicted intracellular proteins		no	detected in cancers	detected in normal tissues	Expressed in all	Expressed in all
HSP90AA1	ENSG00000080824	Cancer-related genes, Plasma proteins, Predicted intracellular proteins	Renal cancer:1.18e-5 (favourable), Liver cancer:3.09e-5 (unfavourable), Breast cancer:5.59e-4 (unfavourable)	yes	detected in cancers	detected in normal tissues	Expressed in all	Expressed in all
HSPA9	ENSG00000113013	Disease related genes, Plasma proteins, Predicted intracellular proteins	Breast cancer:2.93e-4 (unfavourable), Colorectal cancer:4.53e-4 (favourable)	yes	detected in cancers	detected in normal tissues	Expressed in all	Expressed in all
HSPB2	ENSG00000170276	Predicted intracellular proteins		no	NA	NA	Mixed	Tissue enhanced
HTRA1	ENSG00000166033	Disease related genes, Enzymes, Plasma proteins, Potential drug targets, Predicted intracellular proteins, Predicted secreted proteins	Renal cancer:7.90e-7 (unfavourable), Urothelial cancer:5.62e-6 (unfavourable), Glioma:8.66e-4 (unfavourable)	yes	detected in cancers	detected in normal tissues	Expressed in all	Mixed
IDE	ENSG00000119912	Enzymes, FDA approved drug targets, Plasma proteins, Predicted intracellular proteins, Predicted secreted proteins	Endometrial cancer:3.53e-4 (favourable), Colorectal cancer:3.69e-4 (favourable)	yes	detected in cancers	detected in normal tissues	Expressed in all	Expressed in all
IFI6	ENSG00000126709	Predicted membrane proteins		no	detected in cancers	detected in normal tissues	Expressed in all	Expressed in all
IGF1R	ENSG00000140443	Cancer-related genes, CD markers, Disease related genes, Enzymes, FDA approved drug targets, Plasma proteins, Predicted intracellular proteins, Predicted membrane proteins, RAS pathway related proteins	Renal cancer:3.75e-7 (favourable)	yes	detected in cancers	detected in normal tissues	Expressed in all	Mixed
IL1A	ENSG00000115008	Cancer-related genes, Plasma proteins, Predicted intracellular proteins, Transporters	Lung cancer:1.54e-4 (unfavourable), Stomach cancer:4.03e-4 (unfavourable), Cervical cancer:9.52e-4 (unfavourable)	yes	NA	NA	Tissue enhanced	Tissue enhanced
IL1B	ENSG00000125538	Cancer-related genes, Candidate cardiovascular disease genes, FDA approved drug targets, Plasma proteins, Predicted intracellular proteins	Renal cancer:7.49e-5 (unfavourable), Cervical cancer:1.31e-4 (unfavourable)	yes	NA	NA	Mixed	Tissue enhanced
IL6	ENSG00000136244	Cancer-related genes, Candidate cardiovascular disease genes, Disease related genes, FDA approved drug targets, Plasma proteins, Predicted intracellular proteins, Predicted secreted proteins	Renal cancer:1.10e-11 (unfavourable)	yes	detected in cancers	detected in normal tissues	Mixed	Tissue enhanced
ING1	ENSG00000153487	Cancer-related genes, Disease related genes, Predicted intracellular proteins	Endometrial cancer:5.81e-4 (favourable)	yes	detected in cancers	detected in normal tissues	Expressed in all	Expressed in all
INS	ENSG00000254647	Cancer-related genes, Candidate cardiovascular disease genes, Disease related genes, Plasma proteins, Predicted secreted proteins, RAS pathway related proteins		no	detected in cancers	detected in normal tissues	Tissue enriched	Tissue enriched
INSR	ENSG00000171105	CD markers, Disease related genes, Enzymes, FDA approved drug targets, Plasma proteins, Predicted intracellular proteins, Predicted membrane proteins, RAS pathway related proteins		no	detected in cancers	detected in normal tissues	Expressed in all	Expressed in all
KL	ENSG00000133116	Disease related genes, Enzymes, Potential drug targets, Predicted membrane proteins, Transporters	Renal cancer:1.29e-9 (favourable), Pancreatic cancer:4.44e-4 (favourable)	yes	NA	NA	Group enriched	Group enriched
KLK1	ENSG00000167748	Enzymes, Predicted secreted proteins		no	NA	NA	Group enriched	Group enriched
KLK6	ENSG00000167755	Cancer-related genes, Enzymes, Plasma proteins, Predicted intracellular proteins, Predicted secreted proteins	Endometrial cancer:1.38e-5 (unfavourable), Urothelial cancer:1.27e-4 (unfavourable), Pancreatic cancer:7.82e-4 (unfavourable), Lung cancer:8.85e-4 (unfavourable)	yes	NA	NA	Tissue enhanced	Group enriched
KLK8	ENSG00000129455	Cancer-related genes, Enzymes, Plasma proteins, Predicted intracellular proteins, Predicted secreted proteins	Pancreatic cancer:1.10e-4 (unfavourable), Endometrial cancer:2.31e-4 (unfavourable), Lung cancer:5.72e-4 (unfavourable), Urothelial cancer:6.17e-4 (unfavourable)	yes	detected in cancers	detected in normal tissues	Tissue enhanced	Group enriched
KRAS	ENSG00000133703	Cancer-related genes, Disease related genes, Predicted intracellular proteins, RAS pathway related proteins	Renal cancer:2.75e-5 (favourable), Pancreatic cancer:3.59e-4 (unfavourable)	yes	detected in cancers	detected in normal tissues	Expressed in all	Expressed in all
LMNA	ENSG00000160789	Cancer-related genes, Disease related genes, Plasma proteins, Predicted intracellular proteins		no	detected in cancers	detected in normal tissues	Expressed in all	Expressed in all
LRP1	ENSG00000123384	Candidate cardiovascular disease genes, CD markers, Disease related genes, Plasma proteins, Predicted intracellular proteins, Predicted membrane proteins, Predicted secreted proteins	Urothelial cancer:1.29e-5 (unfavourable), Renal cancer:1.52e-5 (unfavourable)	yes	detected in cancers	detected in normal tissues	Expressed in all	Expressed in all
LRP1B	ENSG00000168702	Cancer-related genes, Plasma proteins, Predicted membrane proteins, Predicted secreted proteins		no	detected in cancers	detected in normal tissues	Tissue enhanced	Tissue enhanced
MAPT	ENSG00000186868	Candidate cardiovascular disease genes, Disease related genes, FDA approved drug targets, Plasma proteins, Predicted intracellular proteins		no	detected in cancers	detected in normal tissues	Group enriched	Tissue enriched
MC1R	ENSG00000258839	Disease related genes, G-protein coupled receptors, Potential drug targets, Predicted membrane proteins	Pancreatic cancer:7.88e-4 (favourable)	yes	NA	NA	Tissue enhanced	Tissue enhanced
MMP2	ENSG00000087245	Cancer-related genes, Candidate cardiovascular disease genes, Disease related genes, Enzymes, FDA approved drug targets, Plasma proteins, Predicted intracellular proteins, Predicted secreted proteins		no	detected in cancers	detected in normal tissues	Expressed in all	Tissue enhanced
MMP3	ENSG00000149968	Cancer-related genes, Candidate cardiovascular disease genes, Disease related genes, Enzymes, FDA approved drug targets, Plasma proteins, Predicted intracellular proteins, Predicted secreted proteins	Pancreatic cancer:4.09e-4 (unfavourable), Cervical cancer:9.73e-4 (unfavourable)	yes	detected in cancers	not found	Tissue enhanced	Tissue enhanced
MPO	ENSG00000005381	Cancer-related genes, Candidate cardiovascular disease genes, Disease related genes, Enzymes, Plasma proteins, Potential drug targets, Predicted intracellular proteins, Predicted secreted proteins		no	not detected	detected in one normal tissues	Tissue enhanced	Tissue enriched
MTOR	ENSG00000198793	Cancer-related genes, Disease related genes, Enzymes, FDA approved drug targets, Plasma proteins, Predicted intracellular proteins	Renal cancer:1.49e-5 (favourable)	yes	detected in cancers	detected in normal tissues	Expressed in all	Expressed in all
NBR1	ENSG00000188554	Predicted intracellular proteins	Renal cancer:2.00e-5 (favourable)	yes	detected in cancers	detected in normal tissues	Expressed in all	Expressed in all
NME1-NME2	ENSG00000011052	Predicted intracellular proteins, Predicted secreted proteins	Glioma:8.99e-4 (favourable)	yes	detected in cancers	detected in normal tissues	Expressed in all	Expressed in all
NNAT	ENSG00000053438	Predicted membrane proteins		no	NA	NA	Group enriched	Group enriched
NOTCH1	ENSG00000148400	Cancer-related genes, Disease related genes, Plasma proteins, Predicted membrane proteins	Renal cancer:5.45e-4 (unfavourable)	yes	detected in cancers	detected in normal tissues	Expressed in all	Expressed in all
NRDC	ENSG00000078618	Enzymes, Plasma proteins, Predicted intracellular proteins	Renal cancer:2.12e-9 (unfavourable), Liver cancer:5.49e-6 (unfavourable)	yes	NA	NA	Expressed in all	Expressed in all
OGG1	ENSG00000114026	Cancer-related genes, Disease related genes, Enzymes, Plasma proteins, Potential drug targets, Predicted intracellular proteins, Predicted secreted proteins	Liver cancer:5.77e-5 (unfavourable), Renal cancer:2.65e-4 (favourable)	yes	detected in cancers	detected in normal tissues	Expressed in all	Expressed in all
PARK2	ENSG00000185345	Disease related genes, Predicted intracellular proteins	Renal cancer:6.75e-12 (favourable)	yes	detected in cancers	detected in normal tissues	Mixed	Mixed
PARK7	ENSG00000116288	Disease related genes, Enzymes, Plasma proteins, Potential drug targets, Predicted intracellular proteins		no	detected in cancers	detected in normal tissues	Expressed in all	Expressed in all
PAWR	ENSG00000177425	Predicted intracellular proteins		no	detected in cancers	detected in normal tissues	Expressed in all	Mixed
PEBP1	ENSG00000089220	Plasma proteins, Predicted intracellular proteins	Renal cancer:2.15e-13 (favourable), Pancreatic cancer:1.52e-4 (favourable)	yes	detected in cancers	detected in normal tissues	Expressed in all	Expressed in all
PIK3CG	ENSG00000105851	Cancer-related genes, Enzymes, Predicted intracellular proteins		no	NA	NA	Mixed	Tissue enhanced
PIN1	ENSG00000127445	Cancer-related genes, Enzymes, Predicted intracellular proteins	Renal cancer:7.80e-5 (favourable), Pancreatic cancer:3.25e-4 (favourable)	yes	detected in cancers	detected in normal tissues	Expressed in all	Expressed in all
PON1	ENSG00000005421	Cancer-related genes, Candidate cardiovascular disease genes, Disease related genes, Enzymes, Plasma proteins, Potential drug targets, Predicted secreted proteins, Transporters	Liver cancer:7.24e-7 (favourable)	yes	detected in cancers	detected in normal tissues	Tissue enriched	Tissue enriched
PPARA	ENSG00000186951	FDA approved drug targets, Nuclear receptors, Predicted intracellular proteins, Transcription factors	Renal cancer:4.39e-9 (favourable)	yes	detected in cancers	detected in normal tissues	Expressed in all	Expressed in all
PPARG	ENSG00000132170	Cancer-related genes, Disease related genes, FDA approved drug targets, Nuclear receptors, Plasma proteins, Predicted intracellular proteins, Transcription factors	Renal cancer:1.59e-8 (favourable), Liver cancer:3.41e-5 (unfavourable), Urothelial cancer:5.52e-5 (favourable)	yes	detected in cancers	detected in normal tissues	Expressed in all	Tissue enhanced
PPARGC1A	ENSG00000109819	Cancer-related genes, Predicted intracellular proteins	Renal cancer:1.49e-14 (favourable), Liver cancer:3.35e-6 (favourable), Thyroid cancer:5.80e-4 (unfavourable)	yes	NA	NA	Tissue enhanced	Mixed
PPP3R1	ENSG00000221823	Predicted intracellular proteins	Endometrial cancer:9.08e-6 (unfavourable), Renal cancer:1.70e-5 (unfavourable), Liver cancer:5.37e-4 (unfavourable)	yes	detected in cancers	detected in normal tissues	Expressed in all	Expressed in all
PRKAA1	ENSG00000132356	Enzymes, FDA approved drug targets, Predicted intracellular proteins		no	detected in cancers	detected in normal tissues	Expressed in all	Expressed in all
PRKACA	ENSG00000072062	Cancer-related genes, Disease related genes, Enzymes, Potential drug targets, Predicted intracellular proteins, RAS pathway related proteins	Cervical cancer:6.28e-6 (favourable), Endometrial cancer:6.26e-5 (unfavourable), Pancreatic cancer:6.47e-4 (favourable)	yes	detected in cancers	detected in normal tissues	Expressed in all	Expressed in all
PRNP	ENSG00000171867	CD markers, Disease related genes, Plasma proteins, Potential drug targets, Predicted membrane proteins, Predicted secreted proteins, Transporters	Liver cancer:7.41e-5 (unfavourable), Glioma:1.99e-4 (unfavourable), Colorectal cancer:2.96e-4 (unfavourable), Endometrial cancer:4.64e-4 (unfavourable)	yes	detected in cancers	detected in normal tissues	Expressed in all	Expressed in all
PSEN1	ENSG00000080815	Cancer-related genes, Disease related genes, Enzymes, Potential drug targets, Predicted intracellular proteins, Predicted membrane proteins, Transporters	Renal cancer:1.52e-8 (favourable), Liver cancer:1.99e-5 (unfavourable)	yes	detected in cancers	detected in normal tissues	Expressed in all	Expressed in all
PSEN2	ENSG00000143801	Disease related genes, Enzymes, Potential drug targets, Predicted intracellular proteins, Predicted membrane proteins, Transporters		no	NA	NA	Expressed in all	Expressed in all
PTGS2	ENSG00000073756	Cancer-related genes, Enzymes, FDA approved drug targets, Predicted secreted proteins	Renal cancer:9.79e-4 (unfavourable)	yes	detected in cancers	detected in normal tissues	Mixed	Tissue enhanced
PTPRS	ENSG00000105426	Enzymes, Plasma proteins, Predicted membrane proteins, Predicted secreted proteins	Pancreatic cancer:1.07e-4 (favourable), Renal cancer:1.70e-4 (unfavourable)	yes	NA	NA	Expressed in all	Mixed
RCAN1	ENSG00000159200	Predicted intracellular proteins		no	detected in cancers	detected in normal tissues	Expressed in all	Tissue enriched
RPSA	ENSG00000168028	Disease related genes, Plasma proteins, Predicted intracellular proteins, Ribosomal proteins		no	detected in cancers	detected in normal tissues	Expressed in all	Expressed in all
S100A8	ENSG00000143546	Cancer-related genes, Plasma proteins, Predicted intracellular proteins	Renal cancer:8.94e-7 (unfavourable)	yes	detected in cancers	detected in normal tissues	Expressed in all	Group enriched
S100A9	ENSG00000163220	Cancer-related genes, Plasma proteins, Predicted intracellular proteins	Liver cancer:1.13e-6 (unfavourable), Renal cancer:8.10e-4 (unfavourable)	yes	detected in cancers	detected in normal tissues	Expressed in all	Group enriched
SH3PXD2A	ENSG00000107957	Predicted intracellular proteins	Renal cancer:2.04e-6 (unfavourable), Ovarian cancer:3.18e-4 (unfavourable)	yes	detected in cancers	detected in normal tissues	Expressed in all	Mixed
SIGMAR1	ENSG00000147955	Disease related genes, FDA approved drug targets, Predicted membrane proteins, Predicted secreted proteins, Transporters	Urothelial cancer:3.42e-4 (unfavourable)	yes	detected in cancers	detected in normal tissues	Expressed in all	Expressed in all
SIRT1	ENSG00000096717	Predicted intracellular proteins		no	detected in cancers	detected in normal tissues	Expressed in all	Expressed in all
SIRT3	ENSG00000142082	Predicted intracellular proteins	Renal cancer:4.85e-9 (favourable), Endometrial cancer:8.51e-5 (favourable), Pancreatic cancer:4.45e-4 (favourable), Glioma:9.21e-4 (unfavourable)	yes	detected in cancers	detected in normal tissues	Expressed in all	Expressed in all
SNCA	ENSG00000145335	Disease related genes, Plasma proteins, Potential drug targets, Predicted intracellular proteins, Transporters		no	detected in cancers	detected in normal tissues	Tissue enriched	Group enriched
SNCG	ENSG00000173267	Predicted intracellular proteins	Renal cancer:2.29e-8 (unfavourable), Stomach cancer:7.15e-4 (unfavourable)	yes	detected in cancers	detected in normal tissues	Group enriched	Tissue enhanced
SOD1	ENSG00000142168	Cancer-related genes, Disease related genes, Enzymes, Plasma proteins, Potential drug targets, Predicted intracellular proteins		no	detected in cancers	detected in normal tissues	Expressed in all	Expressed in all
SOS1	ENSG00000115904	Cancer-related genes, Disease related genes, Plasma proteins, Predicted intracellular proteins, RAS pathway related proteins		no	detected in cancers	detected in normal tissues	Expressed in all	Expressed in all
SQSTM1	ENSG00000161011	Disease related genes, Predicted intracellular proteins	Liver cancer:2.31e-5 (unfavourable)	yes	detected in cancers	detected in normal tissues	Expressed in all	Expressed in all
STUB1	ENSG00000103266	Disease related genes, Enzymes, Potential drug targets, Predicted intracellular proteins	Renal cancer:6.49e-9 (favourable)	yes	detected in cancers	detected in normal tissues	Expressed in all	Expressed in all
TARBP2	ENSG00000139546	Predicted intracellular proteins	Renal cancer:4.75e-6 (unfavourable), Liver cancer:3.09e-4 (unfavourable)	yes	detected in cancers	detected in normal tissues	Expressed in all	Expressed in all
TKTL1	ENSG00000007350	Enzymes, Predicted intracellular proteins		no	detected in cancers	detected in normal tissues	Tissue enriched	Tissue enriched
TLR4	ENSG00000136869	CD markers, Predicted membrane proteins	Testis cancer:3.79e-4 (unfavourable), Endometrial cancer:6.29e-4 (favourable)	yes	detected in cancers	detected in normal tissues	Expressed in all	Mixed
TM2D1	ENSG00000162604	Predicted membrane proteins	Liver cancer:2.02e-7 (unfavourable)	yes	detected in cancers	detected in normal tissues	Expressed in all	Expressed in all
TNF	ENSG00000232810	Cancer-related genes, Candidate cardiovascular disease genes, Disease related genes, FDA approved drug targets, Plasma proteins, Predicted intracellular proteins		no	NA	NA	Mixed	Tissue enhanced
TP53	ENSG00000141510	Cancer-related genes, Disease related genes, Plasma proteins, Potential drug targets, Predicted intracellular proteins, Transcription factors, Transporters	Endometrial cancer:1.35e-4 (favourable), Prostate cancer:5.01e-4 (unfavourable)	yes	detected in cancers	detected in normal tissues	Expressed in all	Expressed in all
TRDMT1	ENSG00000107614	Enzymes, Predicted intracellular proteins		no	detected in cancers	detected in normal tissues	Mixed	Mixed
TSPAN12	ENSG00000106025	Disease related genes, Potential drug targets, Predicted membrane proteins, Transporters		no	detected in cancers	detected in normal tissues	Expressed in all	Mixed
UCHL1	ENSG00000154277	Disease related genes, Enzymes, Plasma proteins, Potential drug targets, Predicted intracellular proteins	Endometrial cancer:4.08e-5 (unfavourable), Urothelial cancer:1.93e-4 (unfavourable)	yes	detected in cancers	detected in normal tissues	Expressed in all	Tissue enriched
UCP2	ENSG00000175567	Predicted intracellular proteins, Transporters	Renal cancer:7.80e-6 (unfavourable), Cervical cancer:4.65e-5 (favourable)	yes	detected in cancers	detected in normal tissues	Expressed in all	Expressed in all
UCP3	ENSG00000175564	Disease related genes, Potential drug targets, Predicted intracellular proteins, Transporters		no	detected in cancers	detected in normal tissues	Mixed	Tissue enriched
WNT1	ENSG00000125084	Cancer-related genes, Disease related genes, Predicted secreted proteins		no	NA	NA	Not detected	Tissue enhanced
WT1	ENSG00000184937	Cancer-related genes, Disease related genes, Predicted intracellular proteins, Transcription factors		no	detected in cancers	detected in normal tissues	Tissue enriched	Tissue enhanced
XRCC1	ENSG00000073050	Cancer-related genes, Predicted intracellular proteins	Liver cancer:7.33e-5 (unfavourable)	yes	detected in cancers	detected in normal tissues	Expressed in all	Expressed in all
ZMPSTE24	ENSG00000084073	Disease related genes, Enzymes, Potential drug targets, Predicted membrane proteins, Transporters	Liver cancer:5.73e-6 (unfavourable), Thyroid cancer:6.34e-4 (unfavourable)	yes	detected in cancers	detected in normal tissues	Expressed in all	Expressed in all
