# Supplementary material for: Candidate Genes and MiRNAs Linked to the Inverse Relationship Between Cancer and Alzheimer’s Disease: Insights From Data Mining and Enrichment Analysis
Source: Front Genet. 2019 Sep 24;10:846. doi: 10.3389/fgene.2019.00846 (PMC6771301; doi:10.3389/fgene.2019.00846)
Supplement: Table S4 — List of GO and KEGG terms obtained by functional enrichment terms (Metascape). [file Table_4.xlsx]

## Sheet: TableS4
GroupID	Category	Term	Description	LogP	Log(q-value)	InTerm_InList	Genes	Symbols
1_Summary	GO Biological Processes	GO:0006979	response to oxidative stress	-32.6514	-28.3401	38/443	328,348,351,488,1410,1499,1718,1956,3553,3569,3630,4137,4314,4353,4968,5037,5071,5074,5562,5621,5663,5743,6622,6647,7099,7124,7157,7351,7352,7471,7515,8678,10013,10280,10891,11315,23411,51527,338,682,846,1386,1788,2931,3077,3552,5444,6279,1787,1789,5465,6280,672,3320	APEX1,APOE,APP,ATP2A2,CRYAB,CTNNB1,DHCR24,EGFR,IL1B,IL6,INS,MAPT,MMP3,MPO,OGG1,PEBP1,PRKN,PAWR,PRKAA1,PRNP,PSEN1,PTGS2,SNCA,SOD1,TLR4,TNF,TP53,UCP2,UCP3,WNT1,XRCC1,BECN1,HDAC6,SIGMAR1,PPARGC1A,PARK7,SIRT1,GSKIP,APOB,BSG,CASR,ATF2,DNMT3A,GSK3A,HFE,IL1A,PON1,S100A8,TRDMT1,DNMT3B,PPARA,S100A9,BRCA1,HSP90AA1
1_Member	GO Biological Processes	GO:0006979	response to oxidative stress	-32.6514	-28.3401	38/443	328,348,351,488,1410,1499,1718,1956,3553,3569,3630,4137,4314,4353,4968,5037,5071,5074,5562,5621,5663,5743,6622,6647,7099,7124,7157,7351,7352,7471,7515,8678,10013,10280,10891,11315,23411,51527	APEX1,APOE,APP,ATP2A2,CRYAB,CTNNB1,DHCR24,EGFR,IL1B,IL6,INS,MAPT,MMP3,MPO,OGG1,PEBP1,PRKN,PAWR,PRKAA1,PRNP,PSEN1,PTGS2,SNCA,SOD1,TLR4,TNF,TP53,UCP2,UCP3,WNT1,XRCC1,BECN1,HDAC6,SIGMAR1,PPARGC1A,PARK7,SIRT1,GSKIP
1_Member	GO Biological Processes	GO:0010035	response to inorganic substance	-28.2045	-24.4952	37/540	328,338,351,682,846,1386,1410,1788,1956,2931,3077,3552,3553,3569,4137,4314,4353,4968,5037,5071,5074,5444,5562,5621,5743,6279,6622,6647,7124,7351,7352,8678,10013,10280,10891,11315,23411	APEX1,APOB,APP,BSG,CASR,ATF2,CRYAB,DNMT3A,EGFR,GSK3A,HFE,IL1A,IL1B,IL6,MAPT,MMP3,MPO,OGG1,PEBP1,PRKN,PAWR,PON1,PRKAA1,PRNP,PTGS2,S100A8,SNCA,SOD1,TNF,UCP2,UCP3,BECN1,HDAC6,SIGMAR1,PPARGC1A,PARK7,SIRT1
1_Member	GO Biological Processes	GO:0034599	cellular response to oxidative stress	-21.4481	-18.2507	25/286	328,488,1499,1956,3569,3630,4137,4314,4353,5071,5074,5562,6622,6647,7099,7124,7157,7471,8678,10013,10280,10891,11315,23411,51527	APEX1,ATP2A2,CTNNB1,EGFR,IL6,INS,MAPT,MMP3,MPO,PRKN,PAWR,PRKAA1,SNCA,SOD1,TLR4,TNF,TP53,WNT1,BECN1,HDAC6,SIGMAR1,PPARGC1A,PARK7,SIRT1,GSKIP
1_Member	GO Biological Processes	GO:0000302	response to reactive oxygen species	-18.449	-15.5356	21/229	328,348,1410,1956,3553,3569,4137,4314,4353,5074,5562,6647,7124,7351,7352,8678,10013,10280,10891,11315,23411	APEX1,APOE,CRYAB,EGFR,IL1B,IL6,MAPT,MMP3,MPO,PAWR,PRKAA1,SOD1,TNF,UCP2,UCP3,BECN1,HDAC6,SIGMAR1,PPARGC1A,PARK7,SIRT1
1_Member	GO Biological Processes	GO:0009636	response to toxic substance	-17.5505	-14.7443	27/508	328,348,1410,1787,1788,1789,3553,3569,4353,4968,5037,5071,5074,5444,5465,5562,5743,6279,6280,6647,7124,8678,10013,10280,10891,11315,23411	APEX1,APOE,CRYAB,TRDMT1,DNMT3A,DNMT3B,IL1B,IL6,MPO,OGG1,PEBP1,PRKN,PAWR,PON1,PPARA,PRKAA1,PTGS2,S100A8,S100A9,SOD1,TNF,BECN1,HDAC6,SIGMAR1,PPARGC1A,PARK7,SIRT1
1_Member	GO Biological Processes	GO:0035690	cellular response to drug	-17.1981	-14.4431	23/341	328,672,1499,1788,1789,1956,3553,3569,4314,5071,5074,5562,5621,5743,6647,7124,7157,8678,10013,10280,10891,11315,23411	APEX1,BRCA1,CTNNB1,DNMT3A,DNMT3B,EGFR,IL1B,IL6,MMP3,PRKN,PAWR,PRKAA1,PRNP,PTGS2,SOD1,TNF,TP53,BECN1,HDAC6,SIGMAR1,PPARGC1A,PARK7,SIRT1
1_Member	GO Biological Processes	GO:0097237	cellular response to toxic substance	-14.5568	-12.0967	18/232	328,348,1788,3569,4353,5071,5074,5562,5743,6280,6647,7124,8678,10013,10280,10891,11315,23411	APEX1,APOE,DNMT3A,IL6,MPO,PRKN,PAWR,PRKAA1,PTGS2,S100A9,SOD1,TNF,BECN1,HDAC6,SIGMAR1,PPARGC1A,PARK7,SIRT1
1_Member	GO Biological Processes	GO:0034614	cellular response to reactive oxygen species	-13.2813	-10.9193	15/163	328,1956,3569,4137,4314,4353,5074,5562,6647,7124,8678,10013,10280,11315,23411	APEX1,EGFR,IL6,MAPT,MMP3,MPO,PAWR,PRKAA1,SOD1,TNF,BECN1,HDAC6,SIGMAR1,PARK7,SIRT1
1_Member	GO Biological Processes	GO:0046677	response to antibiotic	-11.9016	-9.63554	18/331	328,1410,1788,3320,3553,3569,4968,5037,5074,5562,6279,6647,7157,8678,10013,10280,11315,23411	APEX1,CRYAB,DNMT3A,HSP90AA1,IL1B,IL6,OGG1,PEBP1,PAWR,PRKAA1,S100A8,SOD1,TP53,BECN1,HDAC6,SIGMAR1,PARK7,SIRT1
1_Member	GO Biological Processes	GO:0071236	cellular response to antibiotic	-10.2034	-8.17306	12/144	328,1788,3553,3569,5074,5562,7157,8678,10013,10280,11315,23411	APEX1,DNMT3A,IL1B,IL6,PAWR,PRKAA1,TP53,BECN1,HDAC6,SIGMAR1,PARK7,SIRT1
1_Member	GO Biological Processes	GO:0042542	response to hydrogen peroxide	-9.11882	-7.24202	11/140	328,1410,3569,5074,5562,6647,8678,10013,10280,11315,23411	APEX1,CRYAB,IL6,PAWR,PRKAA1,SOD1,BECN1,HDAC6,SIGMAR1,PARK7,SIRT1
1_Member	GO Biological Processes	GO:0070301	cellular response to hydrogen peroxide	-8.31188	-6.52164	9/94	328,3569,5074,5562,8678,10013,10280,11315,23411	APEX1,IL6,PAWR,PRKAA1,BECN1,HDAC6,SIGMAR1,PARK7,SIRT1
2_Summary	GO Biological Processes	GO:1901699	cellular response to nitrogen compound	-30.1866	-26.1763	41/643	177,328,351,672,846,1499,1788,1956,2099,2475,2931,2932,3416,3480,3553,3630,3643,4035,4313,4314,5071,5294,5468,5562,5566,5621,5663,5743,6622,6647,6654,6895,7099,7124,7157,7351,7471,7490,9365,10891,23411,682,4851,5465,7352,338,1789,2100,10013,11315	AGER,APEX1,APP,BRCA1,CASR,CTNNB1,DNMT3A,EGFR,ESR1,MTOR,GSK3A,GSK3B,IDE,IGF1R,IL1B,INS,INSR,LRP1,MMP2,MMP3,PRKN,PIK3CG,PPARG,PRKAA1,PRKACA,PRNP,PSEN1,PTGS2,SNCA,SOD1,SOS1,TARBP2,TLR4,TNF,TP53,UCP2,WNT1,WT1,KL,PPARGC1A,SIRT1,BSG,NOTCH1,PPARA,UCP3,APOB,DNMT3B,ESR2,HDAC6,PARK7
2_Member	GO Biological Processes	GO:1901699	cellular response to nitrogen compound	-30.1866	-26.1763	41/643	177,328,351,672,846,1499,1788,1956,2099,2475,2931,2932,3416,3480,3553,3630,3643,4035,4313,4314,5071,5294,5468,5562,5566,5621,5663,5743,6622,6647,6654,6895,7099,7124,7157,7351,7471,7490,9365,10891,23411	AGER,APEX1,APP,BRCA1,CASR,CTNNB1,DNMT3A,EGFR,ESR1,MTOR,GSK3A,GSK3B,IDE,IGF1R,IL1B,INS,INSR,LRP1,MMP2,MMP3,PRKN,PIK3CG,PPARG,PRKAA1,PRKACA,PRNP,PSEN1,PTGS2,SNCA,SOD1,SOS1,TARBP2,TLR4,TNF,TP53,UCP2,WNT1,WT1,KL,PPARGC1A,SIRT1
2_Member	GO Biological Processes	GO:0071417	cellular response to organonitrogen compound	-29.4337	-25.5994	38/540	177,328,351,672,846,1499,1788,1956,2475,2931,2932,3416,3480,3553,3630,3643,4035,4313,5071,5294,5468,5562,5566,5621,5663,5743,6622,6647,6654,7099,7124,7157,7351,7471,7490,9365,10891,23411	AGER,APEX1,APP,BRCA1,CASR,CTNNB1,DNMT3A,EGFR,MTOR,GSK3A,GSK3B,IDE,IGF1R,IL1B,INS,INSR,LRP1,MMP2,PRKN,PIK3CG,PPARG,PRKAA1,PRKACA,PRNP,PSEN1,PTGS2,SNCA,SOD1,SOS1,TLR4,TNF,TP53,UCP2,WNT1,WT1,KL,PPARGC1A,SIRT1
2_Member	GO Biological Processes	GO:1901652	response to peptide	-21.6223	-18.3675	30/477	177,328,351,682,846,2475,2931,2932,3416,3480,3553,3630,3643,4035,4851,5465,5468,5562,5566,5621,5663,5743,6654,7099,7157,7351,7352,7471,9365,23411	AGER,APEX1,APP,BSG,CASR,MTOR,GSK3A,GSK3B,IDE,IGF1R,IL1B,INS,INSR,LRP1,NOTCH1,PPARA,PPARG,PRKAA1,PRKACA,PRNP,PSEN1,PTGS2,SOS1,TLR4,TP53,UCP2,UCP3,WNT1,KL,SIRT1
2_Member	GO Biological Processes	GO:1901653	cellular response to peptide	-18.1123	-15.2633	24/350	177,328,351,846,2931,2932,3416,3480,3553,3630,3643,4035,5468,5562,5566,5621,5663,6654,7099,7157,7351,7471,9365,23411	AGER,APEX1,APP,CASR,GSK3A,GSK3B,IDE,IGF1R,IL1B,INS,INSR,LRP1,PPARG,PRKAA1,PRKACA,PRNP,PSEN1,SOS1,TLR4,TP53,UCP2,WNT1,KL,SIRT1
2_Member	GO Biological Processes	GO:0032870	cellular response to hormone stimulus	-16.089	-13.4211	29/693	328,338,672,1499,1789,1956,2099,2100,2931,3416,3480,3553,3630,3643,4851,5465,5468,5562,5566,6654,7351,7352,7471,7490,9365,10013,10891,11315,23411	APEX1,APOB,BRCA1,CTNNB1,DNMT3B,EGFR,ESR1,ESR2,GSK3A,IDE,IGF1R,IL1B,INS,INSR,NOTCH1,PPARA,PPARG,PRKAA1,PRKACA,SOS1,UCP2,UCP3,WNT1,WT1,KL,HDAC6,PPARGC1A,PARK7,SIRT1
2_Member	GO Biological Processes	GO:0043434	response to peptide hormone	-12.1811	-9.89088	20/417	328,682,2475,2931,3416,3480,3553,3630,3643,5465,5468,5562,5566,5743,6654,7351,7352,7471,9365,23411	APEX1,BSG,MTOR,GSK3A,IDE,IGF1R,IL1B,INS,INSR,PPARA,PPARG,PRKAA1,PRKACA,PTGS2,SOS1,UCP2,UCP3,WNT1,KL,SIRT1
2_Member	GO Biological Processes	GO:0032868	response to insulin	-10.3402	-8.28407	15/260	2475,2931,3416,3480,3553,3630,3643,5465,5468,5562,6654,7351,7352,9365,23411	MTOR,GSK3A,IDE,IGF1R,IL1B,INS,INSR,PPARA,PPARG,PRKAA1,SOS1,UCP2,UCP3,KL,SIRT1
2_Member	GO Biological Processes	GO:0071375	cellular response to peptide hormone stimulus	-9.3712	-7.44364	15/305	328,2931,3416,3480,3553,3630,3643,5468,5562,5566,6654,7351,7471,9365,23411	APEX1,GSK3A,IDE,IGF1R,IL1B,INS,INSR,PPARG,PRKAA1,PRKACA,SOS1,UCP2,WNT1,KL,SIRT1
2_Member	GO Biological Processes	GO:0032869	cellular response to insulin stimulus	-8.36248	-6.56299	12/208	2931,3416,3480,3553,3630,3643,5468,5562,6654,7351,9365,23411	GSK3A,IDE,IGF1R,IL1B,INS,INSR,PPARG,PRKAA1,SOS1,UCP2,KL,SIRT1
2_Member	GO Biological Processes	GO:0008286	insulin receptor signaling pathway	-7.16184	-5.52256	9/127	2931,3416,3480,3553,3630,3643,6654,9365,23411	GSK3A,IDE,IGF1R,IL1B,INS,INSR,SOS1,KL,SIRT1
3_Summary	GO Biological Processes	GO:0007568	aging	-27.5598	-23.9474	30/300	177,328,351,1029,1410,1788,2475,2931,3416,3845,4000,4035,4353,4968,5037,5074,5621,5663,5743,6622,6647,7157,7351,7352,7471,8678,9365,10891,23410,23411	AGER,APEX1,APP,CDKN2A,CRYAB,DNMT3A,MTOR,GSK3A,IDE,KRAS,LMNA,LRP1,MPO,OGG1,PEBP1,PAWR,PRNP,PSEN1,PTGS2,SNCA,SOD1,TP53,UCP2,UCP3,WNT1,BECN1,KL,PPARGC1A,SIRT3,SIRT1
3_Member	GO Biological Processes	GO:0007568	aging	-27.5598	-23.9474	30/300	177,328,351,1029,1410,1788,2475,2931,3416,3845,4000,4035,4353,4968,5037,5074,5621,5663,5743,6622,6647,7157,7351,7352,7471,8678,9365,10891,23410,23411	AGER,APEX1,APP,CDKN2A,CRYAB,DNMT3A,MTOR,GSK3A,IDE,KRAS,LMNA,LRP1,MPO,OGG1,PEBP1,PAWR,PRNP,PSEN1,PTGS2,SNCA,SOD1,TP53,UCP2,UCP3,WNT1,BECN1,KL,PPARGC1A,SIRT3,SIRT1
4_Summary	GO Biological Processes	GO:0010942	positive regulation of cell death	-23.5456	-20.0124	36/680	274,1029,1386,1499,1788,2475,2931,2932,3146,3553,3569,4035,4137,4314,4851,5074,5300,5468,5621,5663,5743,6279,6280,6622,6647,6654,7099,7124,7157,7351,8878,10013,10891,11315,23411,57805,351,1410,1718,2537,4898,5037,846,1956,2099	BIN1,CDKN2A,ATF2,CTNNB1,DNMT3A,MTOR,GSK3A,GSK3B,HMGB1,IL1B,IL6,LRP1,MAPT,MMP3,NOTCH1,PAWR,PIN1,PPARG,PRNP,PSEN1,PTGS2,S100A8,S100A9,SNCA,SOD1,SOS1,TLR4,TNF,TP53,UCP2,SQSTM1,HDAC6,PPARGC1A,PARK7,SIRT1,CCAR2,APP,CRYAB,DHCR24,IFI6,NRDC,PEBP1,CASR,EGFR,ESR1
4_Member	GO Biological Processes	GO:0010942	positive regulation of cell death	-23.5456	-20.0124	36/680	274,1029,1386,1499,1788,2475,2931,2932,3146,3553,3569,4035,4137,4314,4851,5074,5300,5468,5621,5663,5743,6279,6280,6622,6647,6654,7099,7124,7157,7351,8878,10013,10891,11315,23411,57805	BIN1,CDKN2A,ATF2,CTNNB1,DNMT3A,MTOR,GSK3A,GSK3B,HMGB1,IL1B,IL6,LRP1,MAPT,MMP3,NOTCH1,PAWR,PIN1,PPARG,PRNP,PSEN1,PTGS2,S100A8,S100A9,SNCA,SOD1,SOS1,TLR4,TNF,TP53,UCP2,SQSTM1,HDAC6,PPARGC1A,PARK7,SIRT1,CCAR2
4_Member	GO Biological Processes	GO:0043068	positive regulation of programmed cell death	-18.2804	-15.4004	30/626	274,1029,1386,1499,2931,2932,3146,3553,3569,4137,4851,5074,5300,5468,5621,5663,5743,6279,6280,6622,6647,6654,7124,7157,8878,10013,10891,11315,23411,57805	BIN1,CDKN2A,ATF2,CTNNB1,GSK3A,GSK3B,HMGB1,IL1B,IL6,MAPT,NOTCH1,PAWR,PIN1,PPARG,PRNP,PSEN1,PTGS2,S100A8,S100A9,SNCA,SOD1,SOS1,TNF,TP53,SQSTM1,HDAC6,PPARGC1A,PARK7,SIRT1,CCAR2
4_Member	GO Biological Processes	GO:0043065	positive regulation of apoptotic process	-17.3742	-14.5944	29/620	274,1029,1386,1499,2931,2932,3146,3553,3569,4137,4851,5074,5300,5468,5621,5663,5743,6279,6280,6622,6647,6654,7124,7157,8878,10891,11315,23411,57805	BIN1,CDKN2A,ATF2,CTNNB1,GSK3A,GSK3B,HMGB1,IL1B,IL6,MAPT,NOTCH1,PAWR,PIN1,PPARG,PRNP,PSEN1,PTGS2,S100A8,S100A9,SNCA,SOD1,SOS1,TNF,TP53,SQSTM1,PPARGC1A,PARK7,SIRT1,CCAR2
4_Member	GO Biological Processes	GO:0052548	regulation of endopeptidase activity	-9.77106	-7.78397	17/389	274,351,1410,1718,2537,3146,4137,4898,5037,5468,5743,6279,6280,6622,7124,11315,23411	BIN1,APP,CRYAB,DHCR24,IFI6,HMGB1,MAPT,NRDC,PEBP1,PPARG,PTGS2,S100A8,S100A9,SNCA,TNF,PARK7,SIRT1
4_Member	GO Biological Processes	GO:0043281	regulation of cysteine-type endopeptidase activity involved in apoptotic process	-9.44716	-7.51054	13/208	1410,1718,2537,3146,4137,5468,5743,6279,6280,6622,7124,11315,23411	CRYAB,DHCR24,IFI6,HMGB1,MAPT,PPARG,PTGS2,S100A8,S100A9,SNCA,TNF,PARK7,SIRT1
4_Member	GO Biological Processes	GO:0052547	regulation of peptidase activity	-9.30793	-7.39623	17/417	274,351,1410,1718,2537,3146,4137,4898,5037,5468,5743,6279,6280,6622,7124,11315,23411	BIN1,APP,CRYAB,DHCR24,IFI6,HMGB1,MAPT,NRDC,PEBP1,PPARG,PTGS2,S100A8,S100A9,SNCA,TNF,PARK7,SIRT1
4_Member	GO Biological Processes	GO:2000116	regulation of cysteine-type endopeptidase activity	-8.91129	-7.05931	13/230	1410,1718,2537,3146,4137,5468,5743,6279,6280,6622,7124,11315,23411	CRYAB,DHCR24,IFI6,HMGB1,MAPT,PPARG,PTGS2,S100A8,S100A9,SNCA,TNF,PARK7,SIRT1
4_Member	GO Biological Processes	GO:0043280	positive regulation of cysteine-type endopeptidase activity involved in apoptotic process	-6.08399	-4.56501	8/125	3146,4137,5468,6279,6280,6622,7124,23411	HMGB1,MAPT,PPARG,S100A8,S100A9,SNCA,TNF,SIRT1
4_Member	GO Biological Processes	GO:0010952	positive regulation of peptidase activity	-5.75791	-4.28349	9/186	351,3146,4137,5468,6279,6280,6622,7124,23411	APP,HMGB1,MAPT,PPARG,S100A8,S100A9,SNCA,TNF,SIRT1
4_Member	GO Biological Processes	GO:2001056	positive regulation of cysteine-type endopeptidase activity	-5.68856	-4.22599	8/141	3146,4137,5468,6279,6280,6622,7124,23411	HMGB1,MAPT,PPARG,S100A8,S100A9,SNCA,TNF,SIRT1
4_Member	GO Biological Processes	GO:0010950	positive regulation of endopeptidase activity	-5.12371	-3.74125	8/168	3146,4137,5468,6279,6280,6622,7124,23411	HMGB1,MAPT,PPARG,S100A8,S100A9,SNCA,TNF,SIRT1
4_Member	GO Biological Processes	GO:0051345	positive regulation of hydrolase activity	-5.0248	-3.65593	16/746	351,846,1956,2099,2475,2932,3146,4137,5300,5468,6279,6280,6622,6654,7124,23411	APP,CASR,EGFR,ESR1,MTOR,GSK3B,HMGB1,MAPT,PIN1,PPARG,S100A8,S100A9,SNCA,SOS1,TNF,SIRT1
4_Member	GO Biological Processes	GO:0006919	activation of cysteine-type endopeptidase activity involved in apoptotic process	-4.87474	-3.52668	6/87	4137,5468,6279,6280,6622,7124	MAPT,PPARG,S100A8,S100A9,SNCA,TNF
5_Summary	GO Biological Processes	GO:0070997	neuron death	-22.8812	-19.4149	27/317	348,351,1386,1499,1718,2475,2931,2932,3553,3845,4035,4137,5071,5300,5465,5621,5653,5663,6622,6647,7099,7471,10280,10891,11315,23411,80823,3921	APOE,APP,ATF2,CTNNB1,DHCR24,MTOR,GSK3A,GSK3B,IL1B,KRAS,LRP1,MAPT,PRKN,PIN1,PPARA,PRNP,KLK6,PSEN1,SNCA,SOD1,TLR4,WNT1,SIGMAR1,PPARGC1A,PARK7,SIRT1,BHLHB9,RPSA
5_Member	GO Biological Processes	GO:0070997	neuron death	-22.8812	-19.4149	27/317	348,351,1386,1499,1718,2475,2931,2932,3553,3845,4035,4137,5071,5300,5465,5621,5653,5663,6622,6647,7099,7471,10280,10891,11315,23411,80823	APOE,APP,ATF2,CTNNB1,DHCR24,MTOR,GSK3A,GSK3B,IL1B,KRAS,LRP1,MAPT,PRKN,PIN1,PPARA,PRNP,KLK6,PSEN1,SNCA,SOD1,TLR4,WNT1,SIGMAR1,PPARGC1A,PARK7,SIRT1,BHLHB9
5_Member	GO Biological Processes	GO:1901214	regulation of neuron death	-21.5997	-18.3675	25/282	348,1386,1499,1718,2475,2931,2932,3553,3845,4035,4137,5071,5300,5465,5621,5663,6622,6647,7099,7471,10280,10891,11315,23411,80823	APOE,ATF2,CTNNB1,DHCR24,MTOR,GSK3A,GSK3B,IL1B,KRAS,LRP1,MAPT,PRKN,PIN1,PPARA,PRNP,PSEN1,SNCA,SOD1,TLR4,WNT1,SIGMAR1,PPARGC1A,PARK7,SIRT1,BHLHB9
5_Member	GO Biological Processes	GO:0051402	neuron apoptotic process	-15.1036	-12.5915	18/216	348,351,1386,1499,2931,3553,3845,4035,5071,5300,5621,5663,6622,6647,10280,10891,11315,80823	APOE,APP,ATF2,CTNNB1,GSK3A,IL1B,KRAS,LRP1,PRKN,PIN1,PRNP,PSEN1,SNCA,SOD1,SIGMAR1,PPARGC1A,PARK7,BHLHB9
5_Member	GO Biological Processes	GO:0043523	regulation of neuron apoptotic process	-14.7603	-12.275	17/191	348,1386,1499,2931,3553,3845,4035,5071,5300,5621,5663,6622,6647,10280,10891,11315,80823	APOE,ATF2,CTNNB1,GSK3A,IL1B,KRAS,LRP1,PRKN,PIN1,PRNP,PSEN1,SNCA,SOD1,SIGMAR1,PPARGC1A,PARK7,BHLHB9
5_Member	GO Biological Processes	GO:1901215	negative regulation of neuron death	-13.6416	-11.2597	16/187	348,1499,2932,3845,4035,5071,5300,5465,5663,6622,6647,7471,10891,11315,23411,80823	APOE,CTNNB1,GSK3B,KRAS,LRP1,PRKN,PIN1,PPARA,PSEN1,SNCA,SOD1,WNT1,PPARGC1A,PARK7,SIRT1,BHLHB9
5_Member	GO Biological Processes	GO:1901216	positive regulation of neuron death	-11.7377	-9.49447	11/81	1386,1499,2475,2931,2932,3553,4137,5300,5621,6622,7099	ATF2,CTNNB1,MTOR,GSK3A,GSK3B,IL1B,MAPT,PIN1,PRNP,SNCA,TLR4
5_Member	GO Biological Processes	GO:0043524	negative regulation of neuron apoptotic process	-9.25386	-7.35746	11/136	348,3845,4035,5071,5300,5663,6622,6647,10891,11315,80823	APOE,KRAS,LRP1,PRKN,PIN1,PSEN1,SNCA,SOD1,PPARGC1A,PARK7,BHLHB9
5_Member	Canonical Pathways	M17761	ST WNT BETA CATENIN PATHWAY	-8.97975	-7.1217	7/34	1499,2931,2932,3921,4035,5300,5663	CTNNB1,GSK3A,GSK3B,RPSA,LRP1,PIN1,PSEN1
5_Member	GO Biological Processes	GO:0043525	positive regulation of neuron apoptotic process	-6.40681	-4.85887	6/48	1386,1499,2931,3553,5300,5621	ATF2,CTNNB1,GSK3A,IL1B,PIN1,PRNP
6_Summary	GO Biological Processes	GO:0080135	regulation of cellular response to stress	-22.8209	-19.4126	35/663	177,351,672,1029,1410,1499,1956,2475,2932,3146,3320,3480,3553,3630,3845,4077,4137,4314,4968,5071,5074,5743,5802,6647,7099,7124,7471,7515,9531,10013,11202,11315,23411,57805,440275	AGER,APP,BRCA1,CDKN2A,CRYAB,CTNNB1,EGFR,MTOR,GSK3B,HMGB1,HSP90AA1,IGF1R,IL1B,INS,KRAS,NBR1,MAPT,MMP3,OGG1,PRKN,PAWR,PTGS2,PTPRS,SOD1,TLR4,TNF,WNT1,XRCC1,BAG3,HDAC6,KLK8,PARK7,SIRT1,CCAR2,EIF2AK4
6_Member	GO Biological Processes	GO:0080135	regulation of cellular response to stress	-22.8209	-19.4126	35/663	177,351,672,1029,1410,1499,1956,2475,2932,3146,3320,3480,3553,3630,3845,4077,4137,4314,4968,5071,5074,5743,5802,6647,7099,7124,7471,7515,9531,10013,11202,11315,23411,57805,440275	AGER,APP,BRCA1,CDKN2A,CRYAB,CTNNB1,EGFR,MTOR,GSK3B,HMGB1,HSP90AA1,IGF1R,IL1B,INS,KRAS,NBR1,MAPT,MMP3,OGG1,PRKN,PAWR,PTGS2,PTPRS,SOD1,TLR4,TNF,WNT1,XRCC1,BAG3,HDAC6,KLK8,PARK7,SIRT1,CCAR2,EIF2AK4
7_Summary	GO Biological Processes	GO:0031329	regulation of cellular catabolic process	-22.1475	-18.7904	36/748	328,341,348,823,1950,2475,2931,2932,3077,3146,3320,3553,3630,3643,4035,4137,4898,5071,5294,5465,5562,5566,5663,6622,7124,7345,7471,8678,9638,10013,10273,10891,11315,23411,57805,440275,274,351,1410,1718,2537,3416,5037,5468,5621,5743,6279,6280,54103,1956,5300,1499,5444,177,2099,4851,5534,51527,8878,10269	APEX1,APOC1,APOE,CAPN1,EGF,MTOR,GSK3A,GSK3B,HFE,HMGB1,HSP90AA1,IL1B,INS,INSR,LRP1,MAPT,NRDC,PRKN,PIK3CG,PPARA,PRKAA1,PRKACA,PSEN1,SNCA,TNF,UCHL1,WNT1,BECN1,FEZ1,HDAC6,STUB1,PPARGC1A,PARK7,SIRT1,CCAR2,EIF2AK4,BIN1,APP,CRYAB,DHCR24,IFI6,IDE,PEBP1,PPARG,PRNP,PTGS2,S100A8,S100A9,GSAP,EGFR,PIN1,CTNNB1,PON1,AGER,ESR1,NOTCH1,PPP3R1,GSKIP,SQSTM1,ZMPSTE24
7_Member	GO Biological Processes	GO:0031329	regulation of cellular catabolic process	-22.1475	-18.7904	36/748	328,341,348,823,1950,2475,2931,2932,3077,3146,3320,3553,3630,3643,4035,4137,4898,5071,5294,5465,5562,5566,5663,6622,7124,7345,7471,8678,9638,10013,10273,10891,11315,23411,57805,440275	APEX1,APOC1,APOE,CAPN1,EGF,MTOR,GSK3A,GSK3B,HFE,HMGB1,HSP90AA1,IL1B,INS,INSR,LRP1,MAPT,NRDC,PRKN,PIK3CG,PPARA,PRKAA1,PRKACA,PSEN1,SNCA,TNF,UCHL1,WNT1,BECN1,FEZ1,HDAC6,STUB1,PPARGC1A,PARK7,SIRT1,CCAR2,EIF2AK4
7_Member	GO Biological Processes	GO:0030162	regulation of proteolysis	-19.51	-16.4774	34/780	274,348,351,1410,1718,1950,2537,2931,2932,3077,3146,3416,3553,3630,4137,4898,5037,5071,5468,5566,5621,5663,5743,6279,6280,6622,7124,7471,10013,10273,11315,23411,54103,57805	BIN1,APOE,APP,CRYAB,DHCR24,EGF,IFI6,GSK3A,GSK3B,HFE,HMGB1,IDE,IL1B,INS,MAPT,NRDC,PEBP1,PRKN,PPARG,PRKACA,PRNP,PSEN1,PTGS2,S100A8,S100A9,SNCA,TNF,WNT1,HDAC6,STUB1,PARK7,SIRT1,GSAP,CCAR2
7_Member	GO Biological Processes	GO:0031331	positive regulation of cellular catabolic process	-17.2831	-14.5158	23/338	348,1950,2931,2932,3146,3320,3553,3630,3643,4035,4898,5071,5465,5562,5663,6622,7124,8678,10013,10273,11315,23411,440275	APOE,EGF,GSK3A,GSK3B,HMGB1,HSP90AA1,IL1B,INS,INSR,LRP1,NRDC,PRKN,PPARA,PRKAA1,PSEN1,SNCA,TNF,BECN1,HDAC6,STUB1,PARK7,SIRT1,EIF2AK4
7_Member	GO Biological Processes	GO:0009896	positive regulation of catabolic process	-16.8292	-14.0977	24/398	348,1950,2931,2932,3146,3320,3416,3553,3630,3643,4035,4898,5071,5465,5562,5663,6622,7124,8678,10013,10273,11315,23411,440275	APOE,EGF,GSK3A,GSK3B,HMGB1,HSP90AA1,IDE,IL1B,INS,INSR,LRP1,NRDC,PRKN,PPARA,PRKAA1,PSEN1,SNCA,TNF,BECN1,HDAC6,STUB1,PARK7,SIRT1,EIF2AK4
7_Member	GO Biological Processes	GO:0042176	regulation of protein catabolic process	-15.5508	-12.9554	22/360	348,1950,1956,2931,2932,3077,3320,3416,3553,3630,4035,4898,5071,5300,5566,5663,6622,7124,7471,10273,11315,57805	APOE,EGF,EGFR,GSK3A,GSK3B,HFE,HSP90AA1,IDE,IL1B,INS,LRP1,NRDC,PRKN,PIN1,PRKACA,PSEN1,SNCA,TNF,WNT1,STUB1,PARK7,CCAR2
7_Member	GO Biological Processes	GO:0051099	positive regulation of binding	-11.723	-9.48712	14/171	348,351,1499,1950,2932,3077,3146,4035,5071,5300,5444,5468,5663,11315	APOE,APP,CTNNB1,EGF,GSK3B,HFE,HMGB1,LRP1,PRKN,PIN1,PON1,PPARG,PSEN1,PARK7
7_Member	GO Biological Processes	GO:0045862	positive regulation of proteolysis	-11.5364	-9.32197	18/348	348,351,1950,2931,2932,3146,3553,4137,4898,5071,5468,5663,6279,6280,6622,7124,10273,23411	APOE,APP,EGF,GSK3A,GSK3B,HMGB1,IL1B,MAPT,NRDC,PRKN,PPARG,PSEN1,S100A8,S100A9,SNCA,TNF,STUB1,SIRT1
7_Member	GO Biological Processes	GO:0051098	regulation of binding	-11.3512	-9.17015	18/357	177,348,351,1499,1950,2932,3077,3146,4035,5071,5300,5444,5465,5468,5566,5663,10273,11315	AGER,APOE,APP,CTNNB1,EGF,GSK3B,HFE,HMGB1,LRP1,PRKN,PIN1,PON1,PPARA,PPARG,PRKACA,PSEN1,STUB1,PARK7
7_Member	GO Biological Processes	GO:1903362	regulation of cellular protein catabolic process	-9.86321	-7.85933	14/235	348,1950,2931,2932,3077,3320,4035,5071,5566,5663,7471,10273,11315,57805	APOE,EGF,GSK3A,GSK3B,HFE,HSP90AA1,LRP1,PRKN,PRKACA,PSEN1,WNT1,STUB1,PARK7,CCAR2
7_Member	GO Biological Processes	GO:0016055	Wnt signaling pathway	-9.5483	-7.59486	18/460	348,351,1499,1950,1956,2099,2931,2932,4035,4851,5071,5300,5534,5562,5663,7471,51527,57805	APOE,APP,CTNNB1,EGF,EGFR,ESR1,GSK3A,GSK3B,LRP1,NOTCH1,PRKN,PIN1,PPP3R1,PRKAA1,PSEN1,WNT1,GSKIP,CCAR2
7_Member	GO Biological Processes	GO:0198738	cell-cell signaling by wnt	-9.51805	-7.57029	18/462	348,351,1499,1950,1956,2099,2931,2932,4035,4851,5071,5300,5534,5562,5663,7471,51527,57805	APOE,APP,CTNNB1,EGF,EGFR,ESR1,GSK3A,GSK3B,LRP1,NOTCH1,PRKN,PIN1,PPP3R1,PRKAA1,PSEN1,WNT1,GSKIP,CCAR2
7_Member	GO Biological Processes	GO:0030111	regulation of Wnt signaling pathway	-9.33196	-7.41329	15/307	348,351,1950,1956,2099,2931,2932,4035,4851,5071,5300,5663,7471,51527,57805	APOE,APP,EGF,EGFR,ESR1,GSK3A,GSK3B,LRP1,NOTCH1,PRKN,PIN1,PSEN1,WNT1,GSKIP,CCAR2
7_Member	GO Biological Processes	GO:0045732	positive regulation of protein catabolic process	-9.29493	-7.38496	13/214	348,1950,2931,2932,3320,3416,3553,4035,4898,5071,5663,7124,10273	APOE,EGF,GSK3A,GSK3B,HSP90AA1,IDE,IL1B,LRP1,NRDC,PRKN,PSEN1,TNF,STUB1
7_Member	GO Biological Processes	GO:1905114	cell surface receptor signaling pathway involved in cell-cell signaling	-8.94699	-7.09046	19/566	348,351,1499,1950,1956,2099,2931,2932,4035,4851,5071,5300,5534,5562,5663,6622,7471,51527,57805	APOE,APP,CTNNB1,EGF,EGFR,ESR1,GSK3A,GSK3B,LRP1,NOTCH1,PRKN,PIN1,PPP3R1,PRKAA1,PSEN1,SNCA,WNT1,GSKIP,CCAR2
7_Member	GO Biological Processes	GO:0032092	positive regulation of protein binding	-8.56875	-6.74789	9/88	348,351,2932,3077,4035,5071,5300,5663,11315	APOE,APP,GSK3B,HFE,LRP1,PRKN,PIN1,PSEN1,PARK7
7_Member	GO Biological Processes	GO:0043393	regulation of protein binding	-8.24624	-6.46378	12/213	348,351,2932,3077,4035,5071,5300,5465,5566,5663,10273,11315	APOE,APP,GSK3B,HFE,LRP1,PRKN,PIN1,PPARA,PRKACA,PSEN1,STUB1,PARK7
7_Member	GO Biological Processes	GO:0044257	cellular protein catabolic process	-7.9899	-6.23407	20/721	348,1950,2931,2932,3077,3320,3416,4035,5071,5566,5663,7345,7471,8878,10013,10269,10273,11315,23411,57805	APOE,EGF,GSK3A,GSK3B,HFE,HSP90AA1,IDE,LRP1,PRKN,PRKACA,PSEN1,UCHL1,WNT1,SQSTM1,HDAC6,ZMPSTE24,STUB1,PARK7,SIRT1,CCAR2
7_Member	GO Biological Processes	GO:0060070	canonical Wnt signaling pathway	-7.91956	-6.17521	13/278	348,1499,1950,1956,2931,2932,4851,5071,5300,5663,7471,51527,57805	APOE,CTNNB1,EGF,EGFR,GSK3A,GSK3B,NOTCH1,PRKN,PIN1,PSEN1,WNT1,GSKIP,CCAR2
7_Member	GO Biological Processes	GO:0060828	regulation of canonical Wnt signaling pathway	-7.91514	-6.17197	12/228	348,1950,1956,2931,2932,4851,5071,5300,5663,7471,51527,57805	APOE,EGF,EGFR,GSK3A,GSK3B,NOTCH1,PRKN,PIN1,PSEN1,WNT1,GSKIP,CCAR2
7_Member	GO Biological Processes	GO:2000058	regulation of ubiquitin-dependent protein catabolic process	-7.73065	-6.01146	10/147	1950,2931,2932,3077,5071,5663,7471,10273,11315,57805	EGF,GSK3A,GSK3B,HFE,PRKN,PSEN1,WNT1,STUB1,PARK7,CCAR2
7_Member	GO Biological Processes	GO:1903050	regulation of proteolysis involved in cellular protein catabolic process	-7.38227	-5.71336	11/205	1950,2931,2932,3077,5071,5566,5663,7471,10273,11315,57805	EGF,GSK3A,GSK3B,HFE,PRKN,PRKACA,PSEN1,WNT1,STUB1,PARK7,CCAR2
7_Member	GO Biological Processes	GO:1903364	positive regulation of cellular protein catabolic process	-6.82388	-5.22263	9/139	348,1950,2931,2932,3320,4035,5071,5663,10273	APOE,EGF,GSK3A,GSK3B,HSP90AA1,LRP1,PRKN,PSEN1,STUB1
7_Member	GO Biological Processes	GO:0051603	proteolysis involved in cellular protein catabolic process	-6.30967	-4.76989	17/669	1950,2931,2932,3077,3416,5071,5566,5663,7345,7471,8878,10013,10269,10273,11315,23411,57805	EGF,GSK3A,GSK3B,HFE,IDE,PRKN,PRKACA,PSEN1,UCHL1,WNT1,SQSTM1,HDAC6,ZMPSTE24,STUB1,PARK7,SIRT1,CCAR2
7_Member	GO Biological Processes	GO:0032434	regulation of proteasomal ubiquitin-dependent protein catabolic process	-6.21926	-4.69108	8/120	2931,2932,3077,5071,5663,10273,11315,57805	GSK3A,GSK3B,HFE,PRKN,PSEN1,STUB1,PARK7,CCAR2
7_Member	GO Biological Processes	GO:0061136	regulation of proteasomal protein catabolic process	-5.99854	-4.4913	9/174	2931,2932,3077,5071,5566,5663,10273,11315,57805	GSK3A,GSK3B,HFE,PRKN,PRKACA,PSEN1,STUB1,PARK7,CCAR2
7_Member	GO Biological Processes	GO:0019941	modification-dependent protein catabolic process	-5.65563	-4.1949	15/586	1950,2931,2932,3077,5071,5663,7345,7471,8878,10013,10269,10273,11315,23411,57805	EGF,GSK3A,GSK3B,HFE,PRKN,PSEN1,UCHL1,WNT1,SQSTM1,HDAC6,ZMPSTE24,STUB1,PARK7,SIRT1,CCAR2
7_Member	GO Biological Processes	GO:0043632	modification-dependent macromolecule catabolic process	-5.56589	-4.11784	15/596	1950,2931,2932,3077,5071,5663,7345,7471,8878,10013,10269,10273,11315,23411,57805	EGF,GSK3A,GSK3B,HFE,PRKN,PSEN1,UCHL1,WNT1,SQSTM1,HDAC6,ZMPSTE24,STUB1,PARK7,SIRT1,CCAR2
7_Member	GO Biological Processes	GO:0006511	ubiquitin-dependent protein catabolic process	-5.01137	-3.64547	14/581	1950,2931,2932,3077,5071,5663,7345,7471,8878,10013,10273,11315,23411,57805	EGF,GSK3A,GSK3B,HFE,PRKN,PSEN1,UCHL1,WNT1,SQSTM1,HDAC6,STUB1,PARK7,SIRT1,CCAR2
7_Member	GO Biological Processes	GO:2000060	positive regulation of ubiquitin-dependent protein catabolic process	-4.6558	-3.34529	6/95	1950,2931,2932,5071,5663,10273	EGF,GSK3A,GSK3B,PRKN,PSEN1,STUB1
7_Member	GO Biological Processes	GO:0090263	positive regulation of canonical Wnt signaling pathway	-4.62987	-3.32282	6/96	1950,1956,5300,7471,51527,57805	EGF,EGFR,PIN1,WNT1,GSKIP,CCAR2
7_Member	GO Biological Processes	GO:0032091	negative regulation of protein binding	-4.45643	-3.17767	6/103	2932,3077,5300,5465,10273,11315	GSK3B,HFE,PIN1,PPARA,STUB1,PARK7
7_Member	GO Biological Processes	GO:0051100	negative regulation of binding	-4.26017	-3.0095	7/163	2932,3077,5300,5465,5663,10273,11315	GSK3B,HFE,PIN1,PPARA,PSEN1,STUB1,PARK7
7_Member	GO Biological Processes	GO:0010498	proteasomal protein catabolic process	-4.17342	-2.9354	11/441	2931,2932,3077,5071,5566,5663,7345,10273,11315,23411,57805	GSK3A,GSK3B,HFE,PRKN,PRKACA,PSEN1,UCHL1,STUB1,PARK7,SIRT1,CCAR2
7_Member	GO Biological Processes	GO:1903052	positive regulation of proteolysis involved in cellular protein catabolic process	-4.10503	-2.87889	6/119	1950,2931,2932,5071,5663,10273	EGF,GSK3A,GSK3B,PRKN,PSEN1,STUB1
7_Member	GO Biological Processes	GO:0043161	proteasome-mediated ubiquitin-dependent protein catabolic process	-3.96386	-2.76207	10/387	2931,2932,3077,5071,5663,7345,10273,11315,23411,57805	GSK3A,GSK3B,HFE,PRKN,PSEN1,UCHL1,STUB1,PARK7,SIRT1,CCAR2
7_Member	GO Biological Processes	GO:0030177	positive regulation of Wnt signaling pathway	-3.93	-2.7329	6/128	1950,1956,5300,7471,51527,57805	EGF,EGFR,PIN1,WNT1,GSKIP,CCAR2
7_Member	GO Biological Processes	GO:0032436	positive regulation of proteasomal ubiquitin-dependent protein catabolic process	-3.91288	-2.71698	5/81	2931,2932,5071,5663,10273	GSK3A,GSK3B,PRKN,PSEN1,STUB1
7_Member	GO Biological Processes	GO:0051438	regulation of ubiquitin-protein transferase activity	-3.52505	-2.39678	4/54	5300,5663,10273,11315	PIN1,PSEN1,STUB1,PARK7
7_Member	GO Biological Processes	GO:1901800	positive regulation of proteasomal protein catabolic process	-3.42452	-2.31098	5/103	2931,2932,5071,5663,10273	GSK3A,GSK3B,PRKN,PSEN1,STUB1
8_Summary	GO Biological Processes	GO:0016049	cell growth	-21.6485	-18.3675	30/476	102,348,351,1029,1410,1499,1956,2100,2475,2931,2932,3320,3621,3630,4137,5071,5300,5468,5654,5802,6279,6280,6868,7157,7490,10013,10519,23411,57805,440275,3643,4353,4851,6647,7124,8878,28514	ADAM10,APOE,APP,CDKN2A,CRYAB,CTNNB1,EGFR,ESR2,MTOR,GSK3A,GSK3B,HSP90AA1,ING1,INS,MAPT,PRKN,PIN1,PPARG,HTRA1,PTPRS,S100A8,S100A9,ADAM17,TP53,WT1,HDAC6,CIB1,SIRT1,CCAR2,EIF2AK4,INSR,MPO,NOTCH1,SOD1,TNF,SQSTM1,DLL1
8_Member	GO Biological Processes	GO:0016049	cell growth	-21.6485	-18.3675	30/476	102,348,351,1029,1410,1499,1956,2100,2475,2931,2932,3320,3621,3630,4137,5071,5300,5468,5654,5802,6279,6280,6868,7157,7490,10013,10519,23411,57805,440275	ADAM10,APOE,APP,CDKN2A,CRYAB,CTNNB1,EGFR,ESR2,MTOR,GSK3A,GSK3B,HSP90AA1,ING1,INS,MAPT,PRKN,PIN1,PPARG,HTRA1,PTPRS,S100A8,S100A9,ADAM17,TP53,WT1,HDAC6,CIB1,SIRT1,CCAR2,EIF2AK4
8_Member	GO Biological Processes	GO:0040008	regulation of growth	-20.3362	-17.2289	33/680	102,348,351,1029,1410,1956,2100,2475,2931,2932,3621,3630,3643,4137,4353,4851,5071,5300,5468,5654,5802,6279,6280,6647,6868,7124,7157,7490,8878,10519,23411,28514,57805	ADAM10,APOE,APP,CDKN2A,CRYAB,EGFR,ESR2,MTOR,GSK3A,GSK3B,ING1,INS,INSR,MAPT,MPO,NOTCH1,PRKN,PIN1,PPARG,HTRA1,PTPRS,S100A8,S100A9,SOD1,ADAM17,TNF,TP53,WT1,SQSTM1,CIB1,SIRT1,DLL1,CCAR2
8_Member	GO Biological Processes	GO:0001558	regulation of cell growth	-17.6481	-14.8281	25/410	102,348,1029,1410,1956,2100,2475,2931,2932,3621,3630,4137,5071,5300,5468,5654,5802,6279,6280,6868,7157,7490,10519,23411,57805	ADAM10,APOE,CDKN2A,CRYAB,EGFR,ESR2,MTOR,GSK3A,GSK3B,ING1,INS,MAPT,PRKN,PIN1,PPARG,HTRA1,PTPRS,S100A8,S100A9,ADAM17,TP53,WT1,CIB1,SIRT1,CCAR2
8_Member	GO Biological Processes	GO:0045927	positive regulation of growth	-10.2235	-8.19088	15/265	102,1956,2475,3630,3643,4137,4851,5071,5300,6279,6280,6868,7490,10519,28514	ADAM10,EGFR,MTOR,INS,INSR,MAPT,NOTCH1,PRKN,PIN1,S100A8,S100A9,ADAM17,WT1,CIB1,DLL1
8_Member	GO Biological Processes	GO:0030307	positive regulation of cell growth	-8.47361	-6.65917	11/161	102,1956,2475,3630,4137,5071,5300,6279,6280,6868,10519	ADAM10,EGFR,MTOR,INS,MAPT,PRKN,PIN1,S100A8,S100A9,ADAM17,CIB1
9_Summary	GO Biological Processes	GO:2000377	regulation of reactive oxygen species metabolic process	-20.8144	-17.6491	21/177	672,1410,1956,2475,3320,3553,3630,3643,4137,4314,5071,5743,6622,6647,7099,7124,7157,8678,10013,11315,23410,4353,9644,217,3416,5037,5465,5562,8277,8574,10891,351,2931,3569,2932,5566,2346,3313	BRCA1,CRYAB,EGFR,MTOR,HSP90AA1,IL1B,INS,INSR,MAPT,MMP3,PRKN,PTGS2,SNCA,SOD1,TLR4,TNF,TP53,BECN1,HDAC6,PARK7,SIRT3,MPO,SH3PXD2A,ALDH2,IDE,PEBP1,PPARA,PRKAA1,TKTL1,AKR7A2,PPARGC1A,APP,GSK3A,IL6,GSK3B,PRKACA,FOLH1,HSPA9
9_Member	GO Biological Processes	GO:2000377	regulation of reactive oxygen species metabolic process	-20.8144	-17.6491	21/177	672,1410,1956,2475,3320,3553,3630,3643,4137,4314,5071,5743,6622,6647,7099,7124,7157,8678,10013,11315,23410	BRCA1,CRYAB,EGFR,MTOR,HSP90AA1,IL1B,INS,INSR,MAPT,MMP3,PRKN,PTGS2,SNCA,SOD1,TLR4,TNF,TP53,BECN1,HDAC6,PARK7,SIRT3
9_Member	GO Biological Processes	GO:0072593	reactive oxygen species metabolic process	-19.5815	-16.5178	23/267	672,1410,1956,2475,3320,3553,3630,3643,4137,4314,4353,5071,5743,6622,6647,7099,7124,7157,8678,9644,10013,11315,23410	BRCA1,CRYAB,EGFR,MTOR,HSP90AA1,IL1B,INS,INSR,MAPT,MMP3,MPO,PRKN,PTGS2,SNCA,SOD1,TLR4,TNF,TP53,BECN1,SH3PXD2A,HDAC6,PARK7,SIRT3
9_Member	GO Biological Processes	GO:0017144	drug metabolic process	-10.474	-8.39811	24/779	217,1956,2475,3320,3416,3553,3630,3643,4314,4353,5037,5071,5465,5562,5743,6622,6647,7099,7124,8277,8574,10013,10891,11315	ALDH2,EGFR,MTOR,HSP90AA1,IDE,IL1B,INS,INSR,MMP3,MPO,PEBP1,PRKN,PPARA,PRKAA1,PTGS2,SNCA,SOD1,TLR4,TNF,TKTL1,AKR7A2,HDAC6,PPARGC1A,PARK7
9_Member	GO Biological Processes	GO:2000378	negative regulation of reactive oxygen species metabolic process	-10.4506	-8.37977	9/55	672,1410,3630,4314,5071,8678,10013,11315,23410	BRCA1,CRYAB,INS,MMP3,PRKN,BECN1,HDAC6,PARK7,SIRT3
9_Member	GO Biological Processes	GO:0033135	regulation of peptidyl-serine phosphorylation	-9.28831	-7.38006	11/135	351,1956,2931,3320,3569,5562,5743,6622,7124,10013,11315	APP,EGFR,GSK3A,HSP90AA1,IL6,PRKAA1,PTGS2,SNCA,TNF,HDAC6,PARK7
9_Member	GO Biological Processes	GO:0033138	positive regulation of peptidyl-serine phosphorylation	-9.23954	-7.35141	10/103	351,1956,2931,3320,3569,5743,6622,7124,10013,11315	APP,EGFR,GSK3A,HSP90AA1,IL6,PTGS2,SNCA,TNF,HDAC6,PARK7
9_Member	GO Biological Processes	GO:0018105	peptidyl-serine phosphorylation	-8.90817	-7.0577	14/278	351,1956,2475,2931,2932,3320,3569,5562,5566,5743,6622,7124,10013,11315	APP,EGFR,MTOR,GSK3A,GSK3B,HSP90AA1,IL6,PRKAA1,PRKACA,PTGS2,SNCA,TNF,HDAC6,PARK7
9_Member	GO Biological Processes	GO:0018209	peptidyl-serine modification	-8.5382	-6.71959	14/297	351,1956,2475,2931,2932,3320,3569,5562,5566,5743,6622,7124,10013,11315	APP,EGFR,MTOR,GSK3A,GSK3B,HSP90AA1,IL6,PRKAA1,PRKACA,PTGS2,SNCA,TNF,HDAC6,PARK7
9_Member	GO Biological Processes	GO:0051186	cofactor metabolic process	-7.55141	-5.85914	17/547	1956,2346,3313,3320,3630,3643,4314,4353,5465,5562,5743,6622,6647,8574,10013,10891,11315	EGFR,FOLH1,HSPA9,HSP90AA1,INS,INSR,MMP3,MPO,PPARA,PRKAA1,PTGS2,SNCA,SOD1,AKR7A2,HDAC6,PPARGC1A,PARK7
9_Member	GO Biological Processes	GO:0042743	hydrogen peroxide metabolic process	-7.33757	-5.67538	7/57	1956,4314,4353,6622,6647,10013,11315	EGFR,MMP3,MPO,SNCA,SOD1,HDAC6,PARK7
9_Member	GO Biological Processes	GO:0016999	antibiotic metabolic process	-6.49263	-4.93331	9/152	217,1956,4314,4353,6622,6647,8574,10013,11315	ALDH2,EGFR,MMP3,MPO,SNCA,SOD1,AKR7A2,HDAC6,PARK7
10_Summary	GO Biological Processes	GO:0009266	response to temperature stimulus	-20.7352	-17.6	22/207	1410,2475,2932,3313,3320,3552,3553,4137,5037,5468,5562,5566,5743,6647,7351,7352,9531,10273,10891,23411,57805,440275,1029,1030,3569,7157,8678,10013,25994	CRYAB,MTOR,GSK3B,HSPA9,HSP90AA1,IL1A,IL1B,MAPT,PEBP1,PPARG,PRKAA1,PRKACA,PTGS2,SOD1,UCP2,UCP3,BAG3,STUB1,PPARGC1A,SIRT1,CCAR2,EIF2AK4,CDKN2A,CDKN2B,IL6,TP53,BECN1,HDAC6,HIGD1A
10_Member	GO Biological Processes	GO:0009266	response to temperature stimulus	-20.7352	-17.6	22/207	1410,2475,2932,3313,3320,3552,3553,4137,5037,5468,5562,5566,5743,6647,7351,7352,9531,10273,10891,23411,57805,440275	CRYAB,MTOR,GSK3B,HSPA9,HSP90AA1,IL1A,IL1B,MAPT,PEBP1,PPARG,PRKAA1,PRKACA,PTGS2,SOD1,UCP2,UCP3,BAG3,STUB1,PPARGC1A,SIRT1,CCAR2,EIF2AK4
10_Member	GO Biological Processes	GO:0009408	response to heat	-15.6015	-12.9803	16/141	1410,2475,2932,3313,3320,3552,3553,4137,5037,5566,5743,6647,9531,10273,23411,57805	CRYAB,MTOR,GSK3B,HSPA9,HSP90AA1,IL1A,IL1B,MAPT,PEBP1,PRKACA,PTGS2,SOD1,BAG3,STUB1,SIRT1,CCAR2
10_Member	GO Biological Processes	GO:0034605	cellular response to heat	-13.7112	-11.3241	13/97	1410,2475,2932,3313,3320,3552,4137,5566,5743,9531,10273,23411,57805	CRYAB,MTOR,GSK3B,HSPA9,HSP90AA1,IL1A,MAPT,PRKACA,PTGS2,BAG3,STUB1,SIRT1,CCAR2
10_Member	GO Biological Processes	GO:1900034	regulation of cellular response to heat	-9.64809	-7.68696	8/45	1410,2475,2932,3320,4137,9531,23411,57805	CRYAB,MTOR,GSK3B,HSP90AA1,MAPT,BAG3,SIRT1,CCAR2
10_Member	Reactome Gene Sets	R-HSA-8953897	Cellular responses to external stimuli	-8.90251	-7.05354	18/505	1029,1030,1410,2475,2932,3313,3320,3552,3569,5562,6647,7157,8678,9531,10013,23411,25994,57805	CDKN2A,CDKN2B,CRYAB,MTOR,GSK3B,HSPA9,HSP90AA1,IL1A,IL6,PRKAA1,SOD1,TP53,BECN1,BAG3,HDAC6,SIRT1,HIGD1A,CCAR2
10_Member	Reactome Gene Sets	R-HSA-3371556	Cellular response to heat stress	-8.56875	-6.74789	9/88	1410,2475,2932,3313,3320,9531,10013,23411,57805	CRYAB,MTOR,GSK3B,HSPA9,HSP90AA1,BAG3,HDAC6,SIRT1,CCAR2
10_Member	Reactome Gene Sets	R-HSA-2262752	Cellular responses to stress	-8.24637	-6.46378	16/428	1029,1030,1410,2475,2932,3313,3320,3552,3569,6647,7157,9531,10013,23411,25994,57805	CDKN2A,CDKN2B,CRYAB,MTOR,GSK3B,HSPA9,HSP90AA1,IL1A,IL6,SOD1,TP53,BAG3,HDAC6,SIRT1,HIGD1A,CCAR2
10_Member	Reactome Gene Sets	R-HSA-3371453	Regulation of HSF1-mediated heat shock response	-4.27666	-3.02181	5/68	2932,3313,9531,23411,57805	GSK3B,HSPA9,BAG3,SIRT1,CCAR2
11_Summary	GO Biological Processes	GO:0070482	response to oxygen levels	-19.5739	-16.5178	25/341	177,846,1410,1788,1789,2475,3553,4000,4313,4851,5465,5468,5562,5664,5743,6868,7157,7351,7352,7515,8678,10273,10891,23411,25994,348,1030,1956,3077,4353,4968,5444,6647,440275,7099,9531,351,672,3845,4157,57805,2911	AGER,CASR,CRYAB,DNMT3A,DNMT3B,MTOR,IL1B,LMNA,MMP2,NOTCH1,PPARA,PPARG,PRKAA1,PSEN2,PTGS2,ADAM17,TP53,UCP2,UCP3,XRCC1,BECN1,STUB1,PPARGC1A,SIRT1,HIGD1A,APOE,CDKN2B,EGFR,HFE,MPO,OGG1,PON1,SOD1,EIF2AK4,TLR4,BAG3,APP,BRCA1,KRAS,MC1R,CCAR2,GRM1
11_Member	GO Biological Processes	GO:0070482	response to oxygen levels	-19.5739	-16.5178	25/341	177,846,1410,1788,1789,2475,3553,4000,4313,4851,5465,5468,5562,5664,5743,6868,7157,7351,7352,7515,8678,10273,10891,23411,25994	AGER,CASR,CRYAB,DNMT3A,DNMT3B,MTOR,IL1B,LMNA,MMP2,NOTCH1,PPARA,PPARG,PRKAA1,PSEN2,PTGS2,ADAM17,TP53,UCP2,UCP3,XRCC1,BECN1,STUB1,PPARGC1A,SIRT1,HIGD1A
11_Member	GO Biological Processes	GO:0001666	response to hypoxia	-19.4068	-16.3964	24/308	177,846,1410,1788,1789,2475,3553,4000,4313,4851,5465,5562,5664,5743,6868,7157,7351,7352,7515,8678,10273,10891,23411,25994	AGER,CASR,CRYAB,DNMT3A,DNMT3B,MTOR,IL1B,LMNA,MMP2,NOTCH1,PPARA,PRKAA1,PSEN2,PTGS2,ADAM17,TP53,UCP2,UCP3,XRCC1,BECN1,STUB1,PPARGC1A,SIRT1,HIGD1A
11_Member	GO Biological Processes	GO:0036293	response to decreased oxygen levels	-19.0815	-16.0924	24/318	177,846,1410,1788,1789,2475,3553,4000,4313,4851,5465,5562,5664,5743,6868,7157,7351,7352,7515,8678,10273,10891,23411,25994	AGER,CASR,CRYAB,DNMT3A,DNMT3B,MTOR,IL1B,LMNA,MMP2,NOTCH1,PPARA,PRKAA1,PSEN2,PTGS2,ADAM17,TP53,UCP2,UCP3,XRCC1,BECN1,STUB1,PPARGC1A,SIRT1,HIGD1A
11_Member	GO Biological Processes	GO:0031667	response to nutrient levels	-15.1773	-12.6441	24/471	348,846,1030,1788,1789,1956,2475,3077,3553,4353,4968,5444,5465,5468,5562,5743,6647,7157,7351,7352,8678,10891,23411,440275	APOE,CASR,CDKN2B,DNMT3A,DNMT3B,EGFR,MTOR,HFE,IL1B,MPO,OGG1,PON1,PPARA,PPARG,PRKAA1,PTGS2,SOD1,TP53,UCP2,UCP3,BECN1,PPARGC1A,SIRT1,EIF2AK4
11_Member	GO Biological Processes	GO:0009991	response to extracellular stimulus	-14.5804	-12.1142	24/501	348,846,1030,1788,1789,1956,2475,3077,3553,4353,4968,5444,5465,5468,5562,5743,6647,7157,7351,7352,8678,10891,23411,440275	APOE,CASR,CDKN2B,DNMT3A,DNMT3B,EGFR,MTOR,HFE,IL1B,MPO,OGG1,PON1,PPARA,PPARG,PRKAA1,PTGS2,SOD1,TP53,UCP2,UCP3,BECN1,PPARGC1A,SIRT1,EIF2AK4
11_Member	GO Biological Processes	GO:0071453	cellular response to oxygen levels	-11.2885	-9.12326	14/184	846,1788,1789,2475,4000,4851,5468,5562,5743,7157,10273,10891,23411,25994	CASR,DNMT3A,DNMT3B,MTOR,LMNA,NOTCH1,PPARG,PRKAA1,PTGS2,TP53,STUB1,PPARGC1A,SIRT1,HIGD1A
11_Member	GO Biological Processes	GO:0071496	cellular response to external stimulus	-11.228	-9.06887	17/314	846,1030,1956,2475,3077,3553,5468,5562,5743,6647,7099,7157,7351,8678,9531,23411,440275	CASR,CDKN2B,EGFR,MTOR,HFE,IL1B,PPARG,PRKAA1,PTGS2,SOD1,TLR4,TP53,UCP2,BECN1,BAG3,SIRT1,EIF2AK4
11_Member	GO Biological Processes	GO:0071456	cellular response to hypoxia	-9.69992	-7.72899	12/159	846,1788,2475,4000,4851,5562,5743,7157,10273,10891,23411,25994	CASR,DNMT3A,MTOR,LMNA,NOTCH1,PRKAA1,PTGS2,TP53,STUB1,PPARGC1A,SIRT1,HIGD1A
11_Member	GO Biological Processes	GO:0036294	cellular response to decreased oxygen levels	-9.42247	-7.49123	12/168	846,1788,2475,4000,4851,5562,5743,7157,10273,10891,23411,25994	CASR,DNMT3A,MTOR,LMNA,NOTCH1,PRKAA1,PTGS2,TP53,STUB1,PPARGC1A,SIRT1,HIGD1A
11_Member	GO Biological Processes	GO:0031669	cellular response to nutrient levels	-9.27002	-7.36858	13/215	846,1030,2475,3077,5468,5562,5743,6647,7157,7351,8678,23411,440275	CASR,CDKN2B,MTOR,HFE,PPARG,PRKAA1,PTGS2,SOD1,TP53,UCP2,BECN1,SIRT1,EIF2AK4
11_Member	GO Biological Processes	GO:0009314	response to radiation	-8.98362	-7.12249	17/438	351,672,1410,1788,1789,1956,2475,3553,3845,4157,4968,5562,5743,7157,23411,57805,440275	APP,BRCA1,CRYAB,DNMT3A,DNMT3B,EGFR,MTOR,IL1B,KRAS,MC1R,OGG1,PRKAA1,PTGS2,TP53,SIRT1,CCAR2,EIF2AK4
11_Member	GO Biological Processes	GO:0031668	cellular response to extracellular stimulus	-8.59946	-6.7738	13/244	846,1030,2475,3077,5468,5562,5743,6647,7157,7351,8678,23411,440275	CASR,CDKN2B,MTOR,HFE,PPARG,PRKAA1,PTGS2,SOD1,TP53,UCP2,BECN1,SIRT1,EIF2AK4
11_Member	GO Biological Processes	GO:0042594	response to starvation	-6.85274	-5.24552	10/182	2475,3077,5468,5562,7157,7351,8678,10891,23411,440275	MTOR,HFE,PPARG,PRKAA1,TP53,UCP2,BECN1,PPARGC1A,SIRT1,EIF2AK4
11_Member	GO Biological Processes	GO:0009416	response to light stimulus	-6.5494	-4.98544	12/304	351,1956,2475,3845,4157,4968,5562,5743,7157,23411,57805,440275	APP,EGFR,MTOR,KRAS,MC1R,OGG1,PRKAA1,PTGS2,TP53,SIRT1,CCAR2,EIF2AK4
11_Member	GO Biological Processes	GO:0009411	response to UV	-5.80651	-4.32379	8/136	1956,4157,5562,5743,7157,23411,57805,440275	EGFR,MC1R,PRKAA1,PTGS2,TP53,SIRT1,CCAR2,EIF2AK4
11_Member	GO Biological Processes	GO:0009267	cellular response to starvation	-5.62002	-4.16477	8/144	2475,3077,5562,7157,7351,8678,23411,440275	MTOR,HFE,PRKAA1,TP53,UCP2,BECN1,SIRT1,EIF2AK4
11_Member	GO Biological Processes	GO:0104004	cellular response to environmental stimulus	-5.58156	-4.13112	11/311	1410,1956,2911,3553,4157,5743,7099,7157,9531,23411,440275	CRYAB,EGFR,GRM1,IL1B,MC1R,PTGS2,TLR4,TP53,BAG3,SIRT1,EIF2AK4
11_Member	GO Biological Processes	GO:0071214	cellular response to abiotic stimulus	-5.58156	-4.13112	11/311	1410,1956,2911,3553,4157,5743,7099,7157,9531,23411,440275	CRYAB,EGFR,GRM1,IL1B,MC1R,PTGS2,TLR4,TP53,BAG3,SIRT1,EIF2AK4
11_Member	GO Biological Processes	GO:0034644	cellular response to UV	-4.01751	-2.80513	5/77	4157,5743,7157,23411,440275	MC1R,PTGS2,TP53,SIRT1,EIF2AK4
11_Member	GO Biological Processes	GO:0071478	cellular response to radiation	-3.12301	-2.05168	6/181	1410,4157,5743,7157,23411,440275	CRYAB,MC1R,PTGS2,TP53,SIRT1,EIF2AK4
11_Member	GO Biological Processes	GO:0071482	cellular response to light stimulus	-3.08913	-2.02352	5/122	4157,5743,7157,23411,440275	MC1R,PTGS2,TP53,SIRT1,EIF2AK4
12_Summary	GO Biological Processes	GO:0051347	positive regulation of transferase activity	-18.6747	-15.7058	31/659	151,177,1499,1950,1956,2475,2911,2931,3146,3320,3480,3553,3630,3643,3845,4137,5294,5300,5562,5566,5621,5663,6622,6647,6868,7099,7124,10273,10519,11315,23411,348,351,1029,1030,6895,7345,51527,3569,4077,4851,5037,5071,9365,23410	ADRA2B,AGER,CTNNB1,EGF,EGFR,MTOR,GRM1,GSK3A,HMGB1,HSP90AA1,IGF1R,IL1B,INS,INSR,KRAS,MAPT,PIK3CG,PIN1,PRKAA1,PRKACA,PRNP,PSEN1,SNCA,SOD1,ADAM17,TLR4,TNF,STUB1,CIB1,PARK7,SIRT1,APOE,APP,CDKN2A,CDKN2B,TARBP2,UCHL1,GSKIP,IL6,NBR1,NOTCH1,PEBP1,PRKN,KL,SIRT3
12_Member	GO Biological Processes	GO:0051347	positive regulation of transferase activity	-18.6747	-15.7058	31/659	151,177,1499,1950,1956,2475,2911,2931,3146,3320,3480,3553,3630,3643,3845,4137,5294,5300,5562,5566,5621,5663,6622,6647,6868,7099,7124,10273,10519,11315,23411	ADRA2B,AGER,CTNNB1,EGF,EGFR,MTOR,GRM1,GSK3A,HMGB1,HSP90AA1,IGF1R,IL1B,INS,INSR,KRAS,MAPT,PIK3CG,PIN1,PRKAA1,PRKACA,PRNP,PSEN1,SNCA,SOD1,ADAM17,TLR4,TNF,STUB1,CIB1,PARK7,SIRT1
12_Member	GO Biological Processes	GO:0045859	regulation of protein kinase activity	-18.5215	-15.5903	33/780	151,177,348,351,1029,1030,1950,1956,2475,2911,3146,3320,3480,3553,3630,3643,3845,5294,5562,5566,5621,5663,6622,6647,6868,6895,7099,7124,7345,10519,11315,23411,51527	ADRA2B,AGER,APOE,APP,CDKN2A,CDKN2B,EGF,EGFR,MTOR,GRM1,HMGB1,HSP90AA1,IGF1R,IL1B,INS,INSR,KRAS,PIK3CG,PRKAA1,PRKACA,PRNP,PSEN1,SNCA,SOD1,ADAM17,TARBP2,TLR4,TNF,UCHL1,CIB1,PARK7,SIRT1,GSKIP
12_Member	GO Biological Processes	GO:0033674	positive regulation of kinase activity	-15.9937	-13.3451	27/586	151,177,1950,1956,2475,2911,3146,3320,3480,3553,3630,3643,3845,4137,5294,5562,5566,5621,5663,6622,6647,6868,7099,7124,10519,11315,23411	ADRA2B,AGER,EGF,EGFR,MTOR,GRM1,HMGB1,HSP90AA1,IGF1R,IL1B,INS,INSR,KRAS,MAPT,PIK3CG,PRKAA1,PRKACA,PRNP,PSEN1,SNCA,SOD1,ADAM17,TLR4,TNF,CIB1,PARK7,SIRT1
12_Member	GO Biological Processes	GO:0043408	regulation of MAPK cascade	-15.814	-13.1839	30/770	151,177,348,351,1499,1950,1956,2911,3146,3480,3553,3569,3630,3643,3845,4077,4851,5037,5071,5294,5300,5562,5663,6647,7099,7124,7345,9365,10519,23410	ADRA2B,AGER,APOE,APP,CTNNB1,EGF,EGFR,GRM1,HMGB1,IGF1R,IL1B,IL6,INS,INSR,KRAS,NBR1,NOTCH1,PEBP1,PRKN,PIK3CG,PIN1,PRKAA1,PSEN1,SOD1,TLR4,TNF,UCHL1,KL,CIB1,SIRT3
12_Member	GO Biological Processes	GO:0045860	positive regulation of protein kinase activity	-15.2253	-12.6698	25/520	151,177,1950,1956,2475,2911,3146,3320,3553,3630,3643,3845,5294,5562,5566,5621,5663,6622,6647,6868,7099,7124,10519,11315,23411	ADRA2B,AGER,EGF,EGFR,MTOR,GRM1,HMGB1,HSP90AA1,IL1B,INS,INSR,KRAS,PIK3CG,PRKAA1,PRKACA,PRNP,PSEN1,SNCA,SOD1,ADAM17,TLR4,TNF,CIB1,PARK7,SIRT1
12_Member	GO Biological Processes	GO:0071900	regulation of protein serine/threonine kinase activity	-13.3488	-10.977	23/514	151,177,348,1029,1030,1950,1956,2911,3480,3553,3643,3845,5294,5562,5663,6622,6647,6868,7099,7124,7345,10519,23411	ADRA2B,AGER,APOE,CDKN2A,CDKN2B,EGF,EGFR,GRM1,IGF1R,IL1B,INSR,KRAS,PIK3CG,PRKAA1,PSEN1,SNCA,SOD1,ADAM17,TLR4,TNF,UCHL1,CIB1,SIRT1
12_Member	GO Biological Processes	GO:0043410	positive regulation of MAPK cascade	-12.6358	-10.3112	23/556	151,177,351,1499,1950,1956,2911,3146,3480,3553,3569,3630,3643,3845,4851,5294,5562,5663,6647,7099,7124,9365,10519	ADRA2B,AGER,APP,CTNNB1,EGF,EGFR,GRM1,HMGB1,IGF1R,IL1B,IL6,INS,INSR,KRAS,NOTCH1,PIK3CG,PRKAA1,PSEN1,SOD1,TLR4,TNF,KL,CIB1
12_Member	GO Biological Processes	GO:0071902	positive regulation of protein serine/threonine kinase activity	-11.6205	-9.39549	18/344	151,177,1950,1956,2911,3553,3643,3845,5294,5562,5663,6622,6647,6868,7099,7124,10519,23411	ADRA2B,AGER,EGF,EGFR,GRM1,IL1B,INSR,KRAS,PIK3CG,PRKAA1,PSEN1,SNCA,SOD1,ADAM17,TLR4,TNF,CIB1,SIRT1
12_Member	GO Biological Processes	GO:0032147	activation of protein kinase activity	-11.076	-8.93197	17/321	151,1950,1956,2475,2911,3146,3553,3630,3643,5562,5566,5621,5663,6647,7099,7124,11315	ADRA2B,EGF,EGFR,MTOR,GRM1,HMGB1,IL1B,INS,INSR,PRKAA1,PRKACA,PRNP,PSEN1,SOD1,TLR4,TNF,PARK7
12_Member	GO Biological Processes	GO:0043405	regulation of MAP kinase activity	-10.5625	-8.47386	17/346	151,177,348,1950,1956,2911,3480,3553,3643,3845,5294,5562,5663,6647,7099,7124,7345	ADRA2B,AGER,APOE,EGF,EGFR,GRM1,IGF1R,IL1B,INSR,KRAS,PIK3CG,PRKAA1,PSEN1,SOD1,TLR4,TNF,UCHL1
12_Member	GO Biological Processes	GO:0043406	positive regulation of MAP kinase activity	-9.13575	-7.25574	14/267	151,177,1950,1956,2911,3553,3643,3845,5294,5562,5663,6647,7099,7124	ADRA2B,AGER,EGF,EGFR,GRM1,IL1B,INSR,KRAS,PIK3CG,PRKAA1,PSEN1,SOD1,TLR4,TNF
12_Member	GO Biological Processes	GO:0000187	activation of MAPK activity	-6.51697	-4.95533	9/151	151,1950,2911,3553,3643,5562,6647,7099,7124	ADRA2B,EGF,GRM1,IL1B,INSR,PRKAA1,SOD1,TLR4,TNF
13_Summary	GO Biological Processes	GO:0043086	negative regulation of catalytic activity	-18.5215	-15.5903	33/780	274,341,348,351,1029,1030,1410,1718,2537,2931,2932,3480,3553,3630,4137,4851,5037,5071,5468,5621,5663,5743,6622,6895,7124,7157,7345,10013,10519,11315,23411,51527,57805,672,1499,1789,2475,5300,5562,7099,7515,10891,23410,5465,1827,2099	BIN1,APOC1,APOE,APP,CDKN2A,CDKN2B,CRYAB,DHCR24,IFI6,GSK3A,GSK3B,IGF1R,IL1B,INS,MAPT,NOTCH1,PEBP1,PRKN,PPARG,PRNP,PSEN1,PTGS2,SNCA,TARBP2,TNF,TP53,UCHL1,HDAC6,CIB1,PARK7,SIRT1,GSKIP,CCAR2,BRCA1,CTNNB1,DNMT3B,MTOR,PIN1,PRKAA1,TLR4,XRCC1,PPARGC1A,SIRT3,PPARA,RCAN1,ESR1
13_Member	GO Biological Processes	GO:0043086	negative regulation of catalytic activity	-18.5215	-15.5903	33/780	274,341,348,351,1029,1030,1410,1718,2537,2931,2932,3480,3553,3630,4137,4851,5037,5071,5468,5621,5663,5743,6622,6895,7124,7157,7345,10013,10519,11315,23411,51527,57805	BIN1,APOC1,APOE,APP,CDKN2A,CDKN2B,CRYAB,DHCR24,IFI6,GSK3A,GSK3B,IGF1R,IL1B,INS,MAPT,NOTCH1,PEBP1,PRKN,PPARG,PRNP,PSEN1,PTGS2,SNCA,TARBP2,TNF,TP53,UCHL1,HDAC6,CIB1,PARK7,SIRT1,GSKIP,CCAR2
13_Member	GO Biological Processes	GO:0031400	negative regulation of protein modification process	-18.033	-15.1988	29/586	348,672,1029,1030,1499,1789,2475,2932,3480,3553,4137,5037,5071,5300,5562,5621,5663,6622,6895,7099,7124,7345,7515,10519,10891,11315,23410,23411,51527	APOE,BRCA1,CDKN2A,CDKN2B,CTNNB1,DNMT3B,MTOR,GSK3B,IGF1R,IL1B,MAPT,PEBP1,PRKN,PIN1,PRKAA1,PRNP,PSEN1,SNCA,TARBP2,TLR4,TNF,UCHL1,XRCC1,CIB1,PPARGC1A,PARK7,SIRT3,SIRT1,GSKIP
13_Member	GO Biological Processes	GO:0010563	negative regulation of phosphorus metabolic process	-16.3504	-13.63	27/567	341,348,1029,1030,2475,2931,2932,3480,3553,4137,5037,5071,5300,5465,5621,5663,6622,6895,7099,7124,7345,10519,10891,11315,23410,23411,51527	APOC1,APOE,CDKN2A,CDKN2B,MTOR,GSK3A,GSK3B,IGF1R,IL1B,MAPT,PEBP1,PRKN,PIN1,PPARA,PRNP,PSEN1,SNCA,TARBP2,TLR4,TNF,UCHL1,CIB1,PPARGC1A,PARK7,SIRT3,SIRT1,GSKIP
13_Member	GO Biological Processes	GO:0045936	negative regulation of phosphate metabolic process	-15.364	-12.785	26/566	341,348,1029,1030,2475,2932,3480,3553,4137,5037,5071,5300,5465,5621,5663,6622,6895,7099,7124,7345,10519,10891,11315,23410,23411,51527	APOC1,APOE,CDKN2A,CDKN2B,MTOR,GSK3B,IGF1R,IL1B,MAPT,PEBP1,PRKN,PIN1,PPARA,PRNP,PSEN1,SNCA,TARBP2,TLR4,TNF,UCHL1,CIB1,PPARGC1A,PARK7,SIRT3,SIRT1,GSKIP
13_Member	GO Biological Processes	GO:0042326	negative regulation of phosphorylation	-14.6157	-12.1432	23/448	348,1029,1030,2475,3480,3553,4137,5037,5071,5300,5465,5621,5663,6622,6895,7099,7345,10519,10891,11315,23410,23411,51527	APOE,CDKN2A,CDKN2B,MTOR,IGF1R,IL1B,MAPT,PEBP1,PRKN,PIN1,PPARA,PRNP,PSEN1,SNCA,TARBP2,TLR4,UCHL1,CIB1,PPARGC1A,PARK7,SIRT3,SIRT1,GSKIP
13_Member	GO Biological Processes	GO:0001933	negative regulation of protein phosphorylation	-13.3143	-10.9474	21/411	348,1029,1030,2475,3480,3553,5037,5071,5300,5621,5663,6622,6895,7099,7345,10519,10891,11315,23410,23411,51527	APOE,CDKN2A,CDKN2B,MTOR,IGF1R,IL1B,PEBP1,PRKN,PIN1,PRNP,PSEN1,SNCA,TARBP2,TLR4,UCHL1,CIB1,PPARGC1A,PARK7,SIRT3,SIRT1,GSKIP
13_Member	GO Biological Processes	GO:0051348	negative regulation of transferase activity	-13.1382	-10.7811	18/280	348,1029,1030,2931,2932,3480,3553,4137,5071,5468,5663,6895,7157,7345,10519,11315,23411,51527	APOE,CDKN2A,CDKN2B,GSK3A,GSK3B,IGF1R,IL1B,MAPT,PRKN,PPARG,PSEN1,TARBP2,TP53,UCHL1,CIB1,PARK7,SIRT1,GSKIP
13_Member	GO Biological Processes	GO:1902532	negative regulation of intracellular signal transduction	-12.4201	-10.113	22/512	348,1827,2099,2475,2931,2932,3480,3553,3630,5037,5071,5300,5562,5621,5743,7099,7345,10519,11315,23410,23411,57805	APOE,RCAN1,ESR1,MTOR,GSK3A,GSK3B,IGF1R,IL1B,INS,PEBP1,PRKN,PIN1,PRKAA1,PRNP,PTGS2,TLR4,UCHL1,CIB1,PARK7,SIRT3,SIRT1,CCAR2
13_Member	GO Biological Processes	GO:0033673	negative regulation of kinase activity	-9.50916	-7.56515	14/250	348,1029,1030,3480,3553,4137,5071,5663,6895,7345,10519,11315,23411,51527	APOE,CDKN2A,CDKN2B,IGF1R,IL1B,MAPT,PRKN,PSEN1,TARBP2,UCHL1,CIB1,PARK7,SIRT1,GSKIP
13_Member	GO Biological Processes	GO:0006469	negative regulation of protein kinase activity	-7.87286	-6.13747	12/230	348,1029,1030,3480,3553,5663,6895,7345,10519,11315,23411,51527	APOE,CDKN2A,CDKN2B,IGF1R,IL1B,PSEN1,TARBP2,UCHL1,CIB1,PARK7,SIRT1,GSKIP
13_Member	GO Biological Processes	GO:0043409	negative regulation of MAPK cascade	-5.91629	-4.42116	9/178	348,3480,3553,5037,5071,5300,7099,7345,23410	APOE,IGF1R,IL1B,PEBP1,PRKN,PIN1,TLR4,UCHL1,SIRT3
13_Member	GO Biological Processes	GO:0071901	negative regulation of protein serine/threonine kinase activity	-4.66302	-3.3506	7/141	348,1029,1030,3553,7345,10519,23411	APOE,CDKN2A,CDKN2B,IL1B,UCHL1,CIB1,SIRT1
14_Summary	GO Biological Processes	GO:0051129	negative regulation of cellular component organization	-18.3393	-15.4429	31/677	341,348,351,672,1410,1789,2931,2932,3146,3630,4000,4035,4137,4851,5071,5444,5621,5663,5802,6622,7124,7515,8678,9531,9638,10013,10519,10891,11202,11315,23411,274,1499,2475,5562,6279,6280,5300,6647,7345,4314	APOC1,APOE,APP,BRCA1,CRYAB,DNMT3B,GSK3A,GSK3B,HMGB1,INS,LMNA,LRP1,MAPT,NOTCH1,PRKN,PON1,PRNP,PSEN1,PTPRS,SNCA,TNF,XRCC1,BECN1,BAG3,FEZ1,HDAC6,CIB1,PPARGC1A,KLK8,PARK7,SIRT1,BIN1,CTNNB1,MTOR,PRKAA1,S100A8,S100A9,PIN1,SOD1,UCHL1,MMP3
14_Member	GO Biological Processes	GO:0051129	negative regulation of cellular component organization	-18.3393	-15.4429	31/677	341,348,351,672,1410,1789,2931,2932,3146,3630,4000,4035,4137,4851,5071,5444,5621,5663,5802,6622,7124,7515,8678,9531,9638,10013,10519,10891,11202,11315,23411	APOC1,APOE,APP,BRCA1,CRYAB,DNMT3B,GSK3A,GSK3B,HMGB1,INS,LMNA,LRP1,MAPT,NOTCH1,PRKN,PON1,PRNP,PSEN1,PTPRS,SNCA,TNF,XRCC1,BECN1,BAG3,FEZ1,HDAC6,CIB1,PPARGC1A,KLK8,PARK7,SIRT1
14_Member	GO Biological Processes	GO:0010639	negative regulation of organelle organization	-7.43704	-5.76014	14/363	672,1789,4000,4137,5071,6622,7515,8678,9531,9638,10013,10519,10891,23411	BRCA1,DNMT3B,LMNA,MAPT,PRKN,SNCA,XRCC1,BECN1,BAG3,FEZ1,HDAC6,CIB1,PPARGC1A,SIRT1
14_Member	GO Biological Processes	GO:0051493	regulation of cytoskeleton organization	-5.64853	-4.18964	14/511	274,672,1499,2475,2932,4035,4137,5071,5562,6279,6280,6622,10013,10519	BIN1,BRCA1,CTNNB1,MTOR,GSK3B,LRP1,MAPT,PRKN,PRKAA1,S100A8,S100A9,SNCA,HDAC6,CIB1
14_Member	GO Biological Processes	GO:0032886	regulation of microtubule-based process	-5.44567	-4.01909	9/203	672,1499,2932,4137,5562,6622,9638,10013,10519	BRCA1,CTNNB1,GSK3B,MAPT,PRKAA1,SNCA,FEZ1,HDAC6,CIB1
14_Member	GO Biological Processes	GO:0070507	regulation of microtubule cytoskeleton organization	-5.01215	-3.64575	8/174	672,1499,2932,4137,5562,6622,10013,10519	BRCA1,CTNNB1,GSK3B,MAPT,PRKAA1,SNCA,HDAC6,CIB1
14_Member	GO Biological Processes	GO:0051354	negative regulation of oxidoreductase activity	-4.53937	-3.24544	4/30	3630,5071,6622,10013	INS,PRKN,SNCA,HDAC6
14_Member	GO Biological Processes	GO:0031109	microtubule polymerization or depolymerization	-4.27362	-3.01992	6/111	1410,4137,5300,6622,10013,10519	CRYAB,MAPT,PIN1,SNCA,HDAC6,CIB1
14_Member	GO Biological Processes	GO:0007017	microtubule-based process	-4.25334	-3.00585	15/771	351,672,1410,1499,2932,4000,4137,5300,5562,6622,6647,7345,9638,10013,10519	APP,BRCA1,CRYAB,CTNNB1,GSK3B,LMNA,MAPT,PIN1,PRKAA1,SNCA,SOD1,UCHL1,FEZ1,HDAC6,CIB1
14_Member	GO Biological Processes	GO:0010310	regulation of hydrogen peroxide metabolic process	-3.80577	-2.62729	3/18	4314,6622,10013	MMP3,SNCA,HDAC6
14_Member	GO Biological Processes	GO:0000226	microtubule cytoskeleton organization	-3.34469	-2.24284	11/550	672,1410,1499,2932,4000,4137,5300,5562,6622,10013,10519	BRCA1,CRYAB,CTNNB1,GSK3B,LMNA,MAPT,PIN1,PRKAA1,SNCA,HDAC6,CIB1
14_Member	GO Biological Processes	GO:0031110	regulation of microtubule polymerization or depolymerization	-3.0039	-1.95141	4/74	4137,6622,10013,10519	MAPT,SNCA,HDAC6,CIB1
14_Member	GO Biological Processes	GO:0031111	negative regulation of microtubule polymerization or depolymerization	-2.93358	-1.89195	3/35	6622,10013,10519	SNCA,HDAC6,CIB1
14_Member	GO Biological Processes	GO:1902904	negative regulation of supramolecular fiber organization	-2.90672	-1.86858	5/134	1410,5071,6622,10013,10519	CRYAB,PRKN,SNCA,HDAC6,CIB1
14_Member	GO Biological Processes	GO:0051494	negative regulation of cytoskeleton organization	-2.8362	-1.80994	5/139	672,5071,6622,10013,10519	BRCA1,PRKN,SNCA,HDAC6,CIB1
15_Summary	GO Biological Processes	GO:0060341	regulation of cellular localization	-18.2559	-15.3917	33/796	488,1410,1499,1950,1956,2931,2932,3077,3320,3553,3630,4000,4035,4137,5071,5300,5562,5566,5621,5663,5743,6622,6623,7124,7157,7351,8678,8878,9531,9638,10519,11315,23411,846,3146,3552,3569,4826,6279,6280,7099,23410,10013,3313,3921,5534,672,1386,3316,440275	ATP2A2,CRYAB,CTNNB1,EGF,EGFR,GSK3A,GSK3B,HFE,HSP90AA1,IL1B,INS,LMNA,LRP1,MAPT,PRKN,PIN1,PRKAA1,PRKACA,PRNP,PSEN1,PTGS2,SNCA,SNCG,TNF,TP53,UCP2,BECN1,SQSTM1,BAG3,FEZ1,CIB1,PARK7,SIRT1,CASR,HMGB1,IL1A,IL6,NNAT,S100A8,S100A9,TLR4,SIRT3,HDAC6,HSPA9,RPSA,PPP3R1,BRCA1,ATF2,HSPB2,EIF2AK4
15_Member	GO Biological Processes	GO:0060341	regulation of cellular localization	-18.2559	-15.3917	33/796	488,1410,1499,1950,1956,2931,2932,3077,3320,3553,3630,4000,4035,4137,5071,5300,5562,5566,5621,5663,5743,6622,6623,7124,7157,7351,8678,8878,9531,9638,10519,11315,23411	ATP2A2,CRYAB,CTNNB1,EGF,EGFR,GSK3A,GSK3B,HFE,HSP90AA1,IL1B,INS,LMNA,LRP1,MAPT,PRKN,PIN1,PRKAA1,PRKACA,PRNP,PSEN1,PTGS2,SNCA,SNCG,TNF,TP53,UCP2,BECN1,SQSTM1,BAG3,FEZ1,CIB1,PARK7,SIRT1
15_Member	GO Biological Processes	GO:1903827	regulation of cellular protein localization	-16.9844	-14.2412	26/485	1499,1950,1956,2931,2932,3077,3320,3553,3630,4000,4035,4137,5071,5300,5562,5566,5621,5663,5743,7124,7157,8878,9531,10519,11315,23411	CTNNB1,EGF,EGFR,GSK3A,GSK3B,HFE,HSP90AA1,IL1B,INS,LMNA,LRP1,MAPT,PRKN,PIN1,PRKAA1,PRKACA,PRNP,PSEN1,PTGS2,TNF,TP53,SQSTM1,BAG3,CIB1,PARK7,SIRT1
15_Member	GO Biological Processes	GO:0090087	regulation of peptide transport	-16.2389	-13.5377	29/684	846,1956,2931,2932,3077,3146,3552,3553,3569,3630,4035,4826,5071,5562,5566,5621,5663,5743,6279,6280,7099,7124,7157,7351,9531,10519,11315,23410,23411	CASR,EGFR,GSK3A,GSK3B,HFE,HMGB1,IL1A,IL1B,IL6,INS,LRP1,NNAT,PRKN,PRKAA1,PRKACA,PRNP,PSEN1,PTGS2,S100A8,S100A9,TLR4,TNF,TP53,UCP2,BAG3,CIB1,PARK7,SIRT3,SIRT1
15_Member	GO Biological Processes	GO:0070201	regulation of establishment of protein localization	-15.1373	-12.6183	28/693	846,1956,2931,2932,3146,3552,3553,3569,3630,4035,4137,4826,5071,5562,5566,5621,5663,5743,7099,7124,7157,7351,9531,10013,10519,11315,23410,23411	CASR,EGFR,GSK3A,GSK3B,HMGB1,IL1A,IL1B,IL6,INS,LRP1,MAPT,NNAT,PRKN,PRKAA1,PRKACA,PRNP,PSEN1,PTGS2,TLR4,TNF,TP53,UCP2,BAG3,HDAC6,CIB1,PARK7,SIRT3,SIRT1
15_Member	GO Biological Processes	GO:0051222	positive regulation of protein transport	-14.8038	-12.3119	22/391	846,1956,2931,2932,3146,3552,3553,3569,3630,4035,4826,5562,5566,5621,5663,5743,7099,7124,7157,9531,10519,23410	CASR,EGFR,GSK3A,GSK3B,HMGB1,IL1A,IL1B,IL6,INS,LRP1,NNAT,PRKAA1,PRKACA,PRNP,PSEN1,PTGS2,TLR4,TNF,TP53,BAG3,CIB1,SIRT3
15_Member	GO Biological Processes	GO:1904951	positive regulation of establishment of protein localization	-14.1205	-11.6842	22/422	846,1956,2931,2932,3146,3552,3553,3569,3630,4035,4826,5562,5566,5621,5663,5743,7099,7124,7157,9531,10519,23410	CASR,EGFR,GSK3A,GSK3B,HMGB1,IL1A,IL1B,IL6,INS,LRP1,NNAT,PRKAA1,PRKACA,PRNP,PSEN1,PTGS2,TLR4,TNF,TP53,BAG3,CIB1,SIRT3
15_Member	GO Biological Processes	GO:0051223	regulation of protein transport	-13.8792	-11.4599	26/654	846,1956,2931,2932,3146,3552,3553,3569,3630,4035,4826,5071,5562,5566,5621,5663,5743,7099,7124,7157,7351,9531,10519,11315,23410,23411	CASR,EGFR,GSK3A,GSK3B,HMGB1,IL1A,IL1B,IL6,INS,LRP1,NNAT,PRKN,PRKAA1,PRKACA,PRNP,PSEN1,PTGS2,TLR4,TNF,TP53,UCP2,BAG3,CIB1,PARK7,SIRT3,SIRT1
15_Member	GO Biological Processes	GO:1903829	positive regulation of cellular protein localization	-13.4526	-11.0757	19/311	1956,2931,2932,3553,3630,4035,4137,5071,5562,5566,5621,5663,5743,7124,7157,8878,9531,10519,11315	EGFR,GSK3A,GSK3B,IL1B,INS,LRP1,MAPT,PRKN,PRKAA1,PRKACA,PRNP,PSEN1,PTGS2,TNF,TP53,SQSTM1,BAG3,CIB1,PARK7
15_Member	GO Biological Processes	GO:0032386	regulation of intracellular transport	-10.1812	-8.15536	17/366	488,1410,2931,2932,3553,5071,5562,5566,5621,5663,5743,7157,9531,9638,10519,11315,23411	ATP2A2,CRYAB,GSK3A,GSK3B,IL1B,PRKN,PRKAA1,PRKACA,PRNP,PSEN1,PTGS2,TP53,BAG3,FEZ1,CIB1,PARK7,SIRT1
15_Member	GO Biological Processes	GO:0033157	regulation of intracellular protein transport	-10.0372	-8.0203	14/228	2931,2932,3553,5071,5562,5566,5621,5663,5743,7157,9531,10519,11315,23411	GSK3A,GSK3B,IL1B,PRKN,PRKAA1,PRKACA,PRNP,PSEN1,PTGS2,TP53,BAG3,CIB1,PARK7,SIRT1
15_Member	GO Biological Processes	GO:0032388	positive regulation of intracellular transport	-9.5514	-7.59605	13/204	2931,2932,3553,5071,5562,5566,5621,5663,5743,7157,9531,9638,10519	GSK3A,GSK3B,IL1B,PRKN,PRKAA1,PRKACA,PRNP,PSEN1,PTGS2,TP53,BAG3,FEZ1,CIB1
15_Member	GO Biological Processes	GO:0090316	positive regulation of intracellular protein transport	-8.64797	-6.81804	11/155	2931,2932,3553,5562,5566,5621,5663,5743,7157,9531,10519	GSK3A,GSK3B,IL1B,PRKAA1,PRKACA,PRNP,PSEN1,PTGS2,TP53,BAG3,CIB1
15_Member	GO Biological Processes	GO:0046822	regulation of nucleocytoplasmic transport	-7.60398	-5.90645	9/113	2932,3553,5566,5663,5743,7157,9531,11315,23411	GSK3B,IL1B,PRKACA,PSEN1,PTGS2,TP53,BAG3,PARK7,SIRT1
15_Member	GO Biological Processes	GO:0006913	nucleocytoplasmic transport	-7.51203	-5.82368	14/358	2932,3313,3553,3921,4000,5534,5566,5663,5743,7124,7157,9531,11315,23411	GSK3B,HSPA9,IL1B,RPSA,LMNA,PPP3R1,PRKACA,PSEN1,PTGS2,TNF,TP53,BAG3,PARK7,SIRT1
15_Member	GO Biological Processes	GO:0051169	nuclear transport	-7.45194	-5.77404	14/362	2932,3313,3553,3921,4000,5534,5566,5663,5743,7124,7157,9531,11315,23411	GSK3B,HSPA9,IL1B,RPSA,LMNA,PPP3R1,PRKACA,PSEN1,PTGS2,TNF,TP53,BAG3,PARK7,SIRT1
15_Member	GO Biological Processes	GO:0046825	regulation of protein export from nucleus	-6.89465	-5.28312	6/40	2932,3553,5566,7157,9531,11315	GSK3B,IL1B,PRKACA,TP53,BAG3,PARK7
15_Member	GO Biological Processes	GO:0046827	positive regulation of protein export from nucleus	-6.88899	-5.27833	5/21	2932,3553,5566,7157,9531	GSK3B,IL1B,PRKACA,TP53,BAG3
15_Member	GO Biological Processes	GO:0046824	positive regulation of nucleocytoplasmic transport	-6.88767	-5.27786	7/66	2932,3553,5566,5663,5743,7157,9531	GSK3B,IL1B,PRKACA,PSEN1,PTGS2,TP53,BAG3
15_Member	GO Biological Processes	GO:0006611	protein export from nucleus	-4.88741	-3.53793	8/181	2932,3313,3553,3921,5566,7157,9531,11315	GSK3B,HSPA9,IL1B,RPSA,PRKACA,TP53,BAG3,PARK7
15_Member	GO Biological Processes	GO:0051168	nuclear export	-4.60619	-3.30257	8/198	2932,3313,3553,3921,5566,7157,9531,11315	GSK3B,HSPA9,IL1B,RPSA,PRKACA,TP53,BAG3,PARK7
15_Member	Canonical Pathways	M242	PID AURORA A PATHWAY	-4.48137	-3.19938	4/31	672,2932,5566,7157	BRCA1,GSK3B,PRKACA,TP53
15_Member	Canonical Pathways	M115	PID REG GR PATHWAY	-3.88762	-2.6955	5/82	2932,3320,3569,5566,7157	GSK3B,HSP90AA1,IL6,PRKACA,TP53
15_Member	KEGG Pathway	hsa05169	Epstein-Barr virus infection	-2.8661	-1.83302	6/203	1386,2932,3316,5566,7157,440275	ATF2,GSK3B,HSPB2,PRKACA,TP53,EIF2AK4
16_Summary	GO Biological Processes	GO:0062012	regulation of small molecule metabolic process	-17.3978	-14.6049	23/334	338,341,348,672,1950,2475,2931,2932,3146,3553,3630,3643,5071,5465,5468,5562,5743,6622,6647,7124,10891,11315,23411,328,351,846,1499,1789,1956,2099,2100,5294,5566,6895,7490,10013,3569,3845,4851,5037,7352,10273,1234,7099,8574,1718,2346,4353,4968,1386,4826,23410,4137,5444,682,9365,1029,1788,7157,7515,8678	APOB,APOC1,APOE,BRCA1,EGF,MTOR,GSK3A,GSK3B,HMGB1,IL1B,INS,INSR,PRKN,PPARA,PPARG,PRKAA1,PTGS2,SNCA,SOD1,TNF,PPARGC1A,PARK7,SIRT1,APEX1,APP,CASR,CTNNB1,DNMT3B,EGFR,ESR1,ESR2,PIK3CG,PRKACA,TARBP2,WT1,HDAC6,IL6,KRAS,NOTCH1,PEBP1,UCP3,STUB1,CCR5,TLR4,AKR7A2,DHCR24,FOLH1,MPO,OGG1,ATF2,NNAT,SIRT3,MAPT,PON1,BSG,KL,CDKN2A,DNMT3A,TP53,XRCC1,BECN1
16_Member	GO Biological Processes	GO:0062012	regulation of small molecule metabolic process	-17.3978	-14.6049	23/334	338,341,348,672,1950,2475,2931,2932,3146,3553,3630,3643,5071,5465,5468,5562,5743,6622,6647,7124,10891,11315,23411	APOB,APOC1,APOE,BRCA1,EGF,MTOR,GSK3A,GSK3B,HMGB1,IL1B,INS,INSR,PRKN,PPARA,PPARG,PRKAA1,PTGS2,SNCA,SOD1,TNF,PPARGC1A,PARK7,SIRT1
16_Member	GO Biological Processes	GO:0071407	cellular response to organic cyclic compound	-15.1824	-12.6441	26/576	328,351,672,846,1499,1789,1956,2099,2100,2931,3553,5071,5294,5465,5468,5566,5743,6622,6647,6895,7124,7490,10013,10891,11315,23411	APEX1,APP,BRCA1,CASR,CTNNB1,DNMT3B,EGFR,ESR1,ESR2,GSK3A,IL1B,PRKN,PIK3CG,PPARA,PPARG,PRKACA,PTGS2,SNCA,SOD1,TARBP2,TNF,WT1,HDAC6,PPARGC1A,PARK7,SIRT1
16_Member	GO Biological Processes	GO:0048545	response to steroid hormone	-13.7387	-11.3411	21/391	672,1499,1789,1956,2099,2100,3146,3553,3569,3845,4851,5037,5465,5468,5743,7124,7352,10013,10891,11315,23411	BRCA1,CTNNB1,DNMT3B,EGFR,ESR1,ESR2,HMGB1,IL1B,IL6,KRAS,NOTCH1,PEBP1,PPARA,PPARG,PTGS2,TNF,UCP3,HDAC6,PPARGC1A,PARK7,SIRT1
16_Member	GO Biological Processes	GO:0019216	regulation of lipid metabolic process	-11.1515	-9.00148	18/367	338,341,348,672,2475,3553,3630,5294,5465,5468,5562,5743,6622,6647,7124,10273,10891,23411	APOB,APOC1,APOE,BRCA1,MTOR,IL1B,INS,PIK3CG,PPARA,PPARG,PRKAA1,PTGS2,SNCA,SOD1,TNF,STUB1,PPARGC1A,SIRT1
16_Member	GO Biological Processes	GO:0046890	regulation of lipid biosynthetic process	-10.4456	-8.37724	13/173	338,341,348,672,2475,3553,3630,5562,5743,6647,7124,10891,23411	APOB,APOC1,APOE,BRCA1,MTOR,IL1B,INS,PRKAA1,PTGS2,SOD1,TNF,PPARGC1A,SIRT1
16_Member	GO Biological Processes	GO:0019217	regulation of fatty acid metabolic process	-10.2906	-8.24164	10/81	341,672,2475,3630,5465,5468,5743,6622,10891,23411	APOC1,BRCA1,MTOR,INS,PPARA,PPARG,PTGS2,SNCA,PPARGC1A,SIRT1
16_Member	GO Biological Processes	GO:0045833	negative regulation of lipid metabolic process	-10.1827	-8.15536	10/83	341,348,672,3553,3630,5294,5562,6647,7124,23411	APOC1,APOE,BRCA1,IL1B,INS,PIK3CG,PRKAA1,SOD1,TNF,SIRT1
16_Member	GO Biological Processes	GO:0010565	regulation of cellular ketone metabolic process	-9.92119	-7.91302	11/118	341,672,2475,3630,5465,5468,5743,6622,10891,11315,23411	APOC1,BRCA1,MTOR,INS,PPARA,PPARG,PTGS2,SNCA,PPARGC1A,PARK7,SIRT1
16_Member	GO Biological Processes	GO:0062014	negative regulation of small molecule metabolic process	-9.82651	-7.82901	10/90	341,348,672,2931,3630,5465,6622,6647,10891,23411	APOC1,APOE,BRCA1,GSK3A,INS,PPARA,SNCA,SOD1,PPARGC1A,SIRT1
16_Member	GO Biological Processes	GO:0071396	cellular response to lipid	-9.51518	-7.5693	20/587	338,672,846,1234,1499,1789,1956,2099,2100,3553,3569,5465,5468,5562,7099,7124,10013,10891,11315,23411	APOB,BRCA1,CASR,CCR5,CTNNB1,DNMT3B,EGFR,ESR1,ESR2,IL1B,IL6,PPARA,PPARG,PRKAA1,TLR4,TNF,HDAC6,PPARGC1A,PARK7,SIRT1
16_Member	GO Biological Processes	GO:0042180	cellular ketone metabolic process	-9.02214	-7.15482	12/182	341,672,2475,3630,5465,5468,5743,6622,8574,10891,11315,23411	APOC1,BRCA1,MTOR,INS,PPARA,PPARG,PTGS2,SNCA,AKR7A2,PPARGC1A,PARK7,SIRT1
16_Member	GO Biological Processes	GO:0044283	small molecule biosynthetic process	-8.66495	-6.83214	21/729	338,341,348,672,1718,1950,2346,3553,3630,3643,4353,4968,5465,5562,5743,6622,6647,7124,10891,11315,23411	APOB,APOC1,APOE,BRCA1,DHCR24,EGF,FOLH1,IL1B,INS,INSR,MPO,OGG1,PPARA,PRKAA1,PTGS2,SNCA,SOD1,TNF,PPARGC1A,PARK7,SIRT1
16_Member	GO Biological Processes	GO:1901983	regulation of protein acetylation	-8.01095	-6.25102	8/71	672,2932,3553,5562,6622,10891,11315,23411	BRCA1,GSK3B,IL1B,PRKAA1,SNCA,PPARGC1A,PARK7,SIRT1
16_Member	GO Biological Processes	GO:0071383	cellular response to steroid hormone stimulus	-7.28455	-5.63049	12/260	672,1499,1789,1956,2099,2100,5465,5468,10013,10891,11315,23411	BRCA1,CTNNB1,DNMT3B,EGFR,ESR1,ESR2,PPARA,PPARG,HDAC6,PPARGC1A,PARK7,SIRT1
16_Member	GO Biological Processes	GO:0018205	peptidyl-lysine modification	-6.82238	-5.22197	13/345	672,1386,1499,1789,3553,4826,5562,6622,10013,10891,11315,23410,23411	BRCA1,ATF2,CTNNB1,DNMT3B,IL1B,NNAT,PRKAA1,SNCA,HDAC6,PPARGC1A,PARK7,SIRT3,SIRT1
16_Member	GO Biological Processes	GO:0006473	protein acetylation	-6.67866	-5.09564	10/190	672,1386,2932,3553,4137,5562,6622,10891,11315,23411	BRCA1,ATF2,GSK3B,IL1B,MAPT,PRKAA1,SNCA,PPARGC1A,PARK7,SIRT1
16_Member	GO Biological Processes	GO:0006631	fatty acid metabolic process	-6.63828	-5.0617	13/358	341,672,2475,3630,5444,5465,5468,5562,5743,6622,7352,10891,23411	APOC1,BRCA1,MTOR,INS,PON1,PPARA,PPARG,PRKAA1,PTGS2,SNCA,UCP3,PPARGC1A,SIRT1
16_Member	GO Biological Processes	GO:0043401	steroid hormone mediated signaling pathway	-6.6155	-5.04392	10/193	672,1499,2099,2100,5465,5468,10013,10891,11315,23411	BRCA1,CTNNB1,ESR1,ESR2,PPARA,PPARG,HDAC6,PPARGC1A,PARK7,SIRT1
16_Member	GO Biological Processes	GO:1901984	negative regulation of protein acetylation	-6.57532	-5.00903	5/24	672,2932,6622,11315,23411	BRCA1,GSK3B,SNCA,PARK7,SIRT1
16_Member	GO Biological Processes	GO:0032787	monocarboxylic acid metabolic process	-6.53307	-4.96989	16/570	341,672,682,2475,3630,3643,5444,5465,5468,5562,5743,6622,7352,10891,11315,23411	APOC1,BRCA1,BSG,MTOR,INS,INSR,PON1,PPARA,PPARG,PRKAA1,PTGS2,SNCA,UCP3,PPARGC1A,PARK7,SIRT1
16_Member	GO Biological Processes	GO:0051055	negative regulation of lipid biosynthetic process	-6.2988	-4.76267	6/50	341,348,672,5562,6647,23411	APOC1,APOE,BRCA1,PRKAA1,SOD1,SIRT1
16_Member	GO Biological Processes	GO:0046394	carboxylic acid biosynthetic process	-6.04522	-4.5325	13/404	341,672,1950,2346,3553,3630,3643,5465,5562,5743,10891,11315,23411	APOC1,BRCA1,EGF,FOLH1,IL1B,INS,INSR,PPARA,PRKAA1,PTGS2,PPARGC1A,PARK7,SIRT1
16_Member	GO Biological Processes	GO:0016053	organic acid biosynthetic process	-6.03323	-4.5212	13/405	341,672,1950,2346,3553,3630,3643,5465,5562,5743,10891,11315,23411	APOC1,BRCA1,EGF,FOLH1,IL1B,INS,INSR,PPARA,PRKAA1,PTGS2,PPARGC1A,PARK7,SIRT1
16_Member	GO Biological Processes	GO:0043543	protein acylation	-5.84989	-4.35872	10/234	672,1386,2932,3553,4137,5562,6622,10891,11315,23411	BRCA1,ATF2,GSK3B,IL1B,MAPT,PRKAA1,SNCA,PPARGC1A,PARK7,SIRT1
16_Member	GO Biological Processes	GO:2000756	regulation of peptidyl-lysine acetylation	-5.82154	-4.33168	6/60	672,3553,5562,6622,10891,23411	BRCA1,IL1B,PRKAA1,SNCA,PPARGC1A,SIRT1
16_Member	GO Biological Processes	GO:0009755	hormone-mediated signaling pathway	-5.76716	-4.29134	10/239	672,1499,2099,2100,5465,5468,10013,10891,11315,23411	BRCA1,CTNNB1,ESR1,ESR2,PPARA,PPARG,HDAC6,PPARGC1A,PARK7,SIRT1
16_Member	GO Biological Processes	GO:0030518	intracellular steroid hormone receptor signaling pathway	-5.71177	-4.24238	8/140	672,1499,2099,2100,10013,10891,11315,23411	BRCA1,CTNNB1,ESR1,ESR2,HDAC6,PPARGC1A,PARK7,SIRT1
16_Member	GO Biological Processes	GO:0030521	androgen receptor signaling pathway	-5.49872	-4.06455	6/68	672,1499,10013,10891,11315,23411	BRCA1,CTNNB1,HDAC6,PPARGC1A,PARK7,SIRT1
16_Member	GO Biological Processes	GO:0008610	lipid biosynthetic process	-5.37139	-3.95709	16/700	338,341,348,672,1718,2475,3553,3630,5294,5562,5743,6647,7124,9365,10891,23411	APOB,APOC1,APOE,BRCA1,DHCR24,MTOR,IL1B,INS,PIK3CG,PRKAA1,PTGS2,SOD1,TNF,KL,PPARGC1A,SIRT1
16_Member	GO Biological Processes	GO:0072330	monocarboxylic acid biosynthetic process	-5.15649	-3.7694	10/280	341,672,3630,3643,5465,5562,5743,10891,11315,23411	APOC1,BRCA1,INS,INSR,PPARA,PRKAA1,PTGS2,PPARGC1A,PARK7,SIRT1
16_Member	GO Biological Processes	GO:0030522	intracellular receptor signaling pathway	-5.10259	-3.7242	10/284	672,1499,2099,2100,5465,5468,10013,10891,11315,23411	BRCA1,CTNNB1,ESR1,ESR2,PPARA,PPARG,HDAC6,PPARGC1A,PARK7,SIRT1
16_Member	GO Biological Processes	GO:0031058	positive regulation of histone modification	-4.99273	-3.6283	6/83	672,1499,1789,3553,10891,23411	BRCA1,CTNNB1,DNMT3B,IL1B,PPARGC1A,SIRT1
16_Member	GO Biological Processes	GO:0045922	negative regulation of fatty acid metabolic process	-4.86511	-3.52081	4/25	341,672,3630,23411	APOC1,BRCA1,INS,SIRT1
16_Member	GO Biological Processes	GO:1905269	positive regulation of chromatin organization	-4.79012	-3.45829	6/90	672,1499,1789,3553,10891,23411	BRCA1,CTNNB1,DNMT3B,IL1B,PPARGC1A,SIRT1
16_Member	GO Biological Processes	GO:0051573	negative regulation of histone H3-K9 methylation	-4.77616	-3.44796	3/9	672,1789,23411	BRCA1,DNMT3B,SIRT1
16_Member	GO Biological Processes	GO:0035065	regulation of histone acetylation	-4.76578	-3.43983	5/54	672,3553,6622,10891,23411	BRCA1,IL1B,SNCA,PPARGC1A,SIRT1
16_Member	GO Biological Processes	GO:0006325	chromatin organization	-4.69862	-3.38244	16/793	672,1029,1386,1499,1788,1789,2099,3146,3553,5562,6622,7157,10013,10891,23410,23411	BRCA1,CDKN2A,ATF2,CTNNB1,DNMT3A,DNMT3B,ESR1,HMGB1,IL1B,PRKAA1,SNCA,TP53,HDAC6,PPARGC1A,SIRT3,SIRT1
16_Member	GO Biological Processes	GO:0033044	regulation of chromosome organization	-4.63156	-3.32364	10/322	672,1499,1789,3553,4137,6622,7515,8678,10891,23411	BRCA1,CTNNB1,DNMT3B,IL1B,MAPT,SNCA,XRCC1,BECN1,PPARGC1A,SIRT1
16_Member	GO Biological Processes	GO:0016569	covalent chromatin modification	-4.61619	-3.31214	12/469	672,1386,1499,1788,1789,3553,5562,6622,10013,10891,23410,23411	BRCA1,ATF2,CTNNB1,DNMT3A,DNMT3B,IL1B,PRKAA1,SNCA,HDAC6,PPARGC1A,SIRT3,SIRT1
16_Member	GO Biological Processes	GO:0031056	regulation of histone modification	-4.60403	-3.30126	7/144	672,1499,1789,3553,6622,10891,23411	BRCA1,CTNNB1,DNMT3B,IL1B,SNCA,PPARGC1A,SIRT1
16_Member	GO Biological Processes	GO:2000758	positive regulation of peptidyl-lysine acetylation	-4.48137	-3.19938	4/31	672,3553,5562,10891	BRCA1,IL1B,PRKAA1,PPARGC1A
16_Member	GO Biological Processes	GO:0006475	internal protein amino acid acetylation	-4.36359	-3.09872	7/157	672,1386,3553,4137,6622,10891,23411	BRCA1,ATF2,IL1B,MAPT,SNCA,PPARGC1A,SIRT1
16_Member	GO Biological Processes	GO:0018394	peptidyl-lysine acetylation	-4.31133	-3.0538	7/160	672,1386,3553,5562,6622,10891,23411	BRCA1,ATF2,IL1B,PRKAA1,SNCA,PPARGC1A,SIRT1
16_Member	GO Biological Processes	GO:2001252	positive regulation of chromosome organization	-4.31133	-3.0538	7/160	672,1499,1789,3553,8678,10891,23411	BRCA1,CTNNB1,DNMT3B,IL1B,BECN1,PPARGC1A,SIRT1
16_Member	GO Biological Processes	GO:0031062	positive regulation of histone methylation	-4.26819	-3.016	4/35	672,1499,1789,23411	BRCA1,CTNNB1,DNMT3B,SIRT1
16_Member	GO Biological Processes	GO:1902275	regulation of chromatin organization	-4.14489	-2.91198	7/170	672,1499,1789,3553,6622,10891,23411	BRCA1,CTNNB1,DNMT3B,IL1B,SNCA,PPARGC1A,SIRT1
16_Member	GO Biological Processes	GO:0031057	negative regulation of histone modification	-4.12503	-2.89573	4/38	672,1789,6622,23411	BRCA1,DNMT3B,SNCA,SIRT1
16_Member	GO Biological Processes	GO:0016570	histone modification	-4.0445	-2.8276	11/456	672,1386,1499,1789,3553,5562,6622,10013,10891,23410,23411	BRCA1,ATF2,CTNNB1,DNMT3B,IL1B,PRKAA1,SNCA,HDAC6,PPARGC1A,SIRT3,SIRT1
16_Member	GO Biological Processes	GO:1901985	positive regulation of protein acetylation	-4.03627	-2.82111	4/40	672,3553,5562,10891	BRCA1,IL1B,PRKAA1,PPARGC1A
16_Member	GO Biological Processes	GO:0042304	regulation of fatty acid biosynthetic process	-3.99369	-2.7844	4/41	341,672,5743,23411	APOC1,BRCA1,PTGS2,SIRT1
16_Member	GO Biological Processes	GO:0045717	negative regulation of fatty acid biosynthetic process	-3.96549	-2.76268	3/16	341,672,23411	APOC1,BRCA1,SIRT1
16_Member	GO Biological Processes	GO:0051571	positive regulation of histone H3-K4 methylation	-3.96549	-2.76268	3/16	672,1499,1789	BRCA1,CTNNB1,DNMT3B
16_Member	GO Biological Processes	GO:0035067	negative regulation of histone acetylation	-3.88306	-2.69292	3/17	672,6622,23411	BRCA1,SNCA,SIRT1
16_Member	GO Biological Processes	GO:0031061	negative regulation of histone methylation	-3.88306	-2.69292	3/17	672,1789,23411	BRCA1,DNMT3B,SIRT1
16_Member	GO Biological Processes	GO:1905268	negative regulation of chromatin organization	-3.75982	-2.58833	4/47	672,1789,6622,23411	BRCA1,DNMT3B,SNCA,SIRT1
16_Member	GO Biological Processes	GO:0051570	regulation of histone H3-K9 methylation	-3.66433	-2.5089	3/20	672,1789,23411	BRCA1,DNMT3B,SIRT1
16_Member	GO Biological Processes	GO:2000757	negative regulation of peptidyl-lysine acetylation	-3.66433	-2.5089	3/20	672,6622,23411	BRCA1,SNCA,SIRT1
16_Member	GO Biological Processes	GO:0016573	histone acetylation	-3.60248	-2.45783	6/147	672,1386,3553,6622,10891,23411	BRCA1,ATF2,IL1B,SNCA,PPARGC1A,SIRT1
16_Member	GO Biological Processes	GO:0018393	internal peptidyl-lysine acetylation	-3.52431	-2.39678	6/152	672,1386,3553,6622,10891,23411	BRCA1,ATF2,IL1B,SNCA,PPARGC1A,SIRT1
16_Member	GO Biological Processes	GO:0051569	regulation of histone H3-K4 methylation	-3.31758	-2.22369	3/26	672,1499,1789	BRCA1,CTNNB1,DNMT3B
16_Member	GO Biological Processes	GO:0035066	positive regulation of histone acetylation	-3.22097	-2.13903	3/28	672,3553,10891	BRCA1,IL1B,PPARGC1A
16_Member	GO Biological Processes	GO:0031060	regulation of histone methylation	-3.19118	-2.11205	4/66	672,1499,1789,23411	BRCA1,CTNNB1,DNMT3B,SIRT1
16_Member	GO Biological Processes	GO:0051567	histone H3-K9 methylation	-3.17543	-2.09858	3/29	672,1789,23411	BRCA1,DNMT3B,SIRT1
16_Member	GO Biological Processes	GO:2001251	negative regulation of chromosome organization	-3.02612	-1.96729	5/126	672,1789,6622,7515,23411	BRCA1,DNMT3B,SNCA,XRCC1,SIRT1
16_Member	GO Biological Processes	GO:0006633	fatty acid biosynthetic process	-2.70364	-1.69344	5/149	341,672,5562,5743,23411	APOC1,BRCA1,PRKAA1,PTGS2,SIRT1
17_Summary	GO Biological Processes	GO:0007610	behavior	-16.2363	-13.5377	27/573	177,348,351,846,1956,2475,2911,3553,3630,3643,3845,4137,5071,5465,5562,5621,5663,5743,6622,6623,6647,7157,7345,11202,11315,80823,440275,488,5566,8878,1499,2931,2932	AGER,APOE,APP,CASR,EGFR,MTOR,GRM1,IL1B,INS,INSR,KRAS,MAPT,PRKN,PPARA,PRKAA1,PRNP,PSEN1,PTGS2,SNCA,SNCG,SOD1,TP53,UCHL1,KLK8,PARK7,BHLHB9,EIF2AK4,ATP2A2,PRKACA,SQSTM1,CTNNB1,GSK3A,GSK3B
17_Member	GO Biological Processes	GO:0007610	behavior	-16.2363	-13.5377	27/573	177,348,351,846,1956,2475,2911,3553,3630,3643,3845,4137,5071,5465,5562,5621,5663,5743,6622,6623,6647,7157,7345,11202,11315,80823,440275	AGER,APOE,APP,CASR,EGFR,MTOR,GRM1,IL1B,INS,INSR,KRAS,MAPT,PRKN,PPARA,PRKAA1,PRNP,PSEN1,PTGS2,SNCA,SNCG,SOD1,TP53,UCHL1,KLK8,PARK7,BHLHB9,EIF2AK4
17_Member	GO Biological Processes	GO:0050804	modulation of chemical synaptic transmission	-12.4894	-10.1737	19/352	177,348,351,488,1956,2911,3553,3630,3845,4137,5071,5566,5621,5663,5743,6622,6623,8878,440275	AGER,APOE,APP,ATP2A2,EGFR,GRM1,IL1B,INS,KRAS,MAPT,PRKN,PRKACA,PRNP,PSEN1,PTGS2,SNCA,SNCG,SQSTM1,EIF2AK4
17_Member	GO Biological Processes	GO:0099177	regulation of trans-synaptic signaling	-12.4676	-10.1562	19/353	177,348,351,488,1956,2911,3553,3630,3845,4137,5071,5566,5621,5663,5743,6622,6623,8878,440275	AGER,APOE,APP,ATP2A2,EGFR,GRM1,IL1B,INS,KRAS,MAPT,PRKN,PRKACA,PRNP,PSEN1,PTGS2,SNCA,SNCG,SQSTM1,EIF2AK4
17_Member	GO Biological Processes	GO:0050890	cognition	-11.9747	-9.70472	17/282	177,348,351,1956,2475,3553,3630,3643,3845,4137,5071,5621,5663,5743,11202,80823,440275	AGER,APOE,APP,EGFR,MTOR,IL1B,INS,INSR,KRAS,MAPT,PRKN,PRNP,PSEN1,PTGS2,KLK8,BHLHB9,EIF2AK4
17_Member	GO Biological Processes	GO:0007611	learning or memory	-11.7934	-9.53889	16/246	177,348,351,1956,2475,3553,3643,3845,4137,5071,5621,5663,5743,11202,80823,440275	AGER,APOE,APP,EGFR,MTOR,IL1B,INSR,KRAS,MAPT,PRKN,PRNP,PSEN1,PTGS2,KLK8,BHLHB9,EIF2AK4
17_Member	GO Biological Processes	GO:0098916	anterograde trans-synaptic signaling	-11.3806	-9.19628	23/640	177,348,351,488,1499,1956,2911,2931,2932,3553,3630,3845,4137,5071,5566,5621,5663,5743,6622,6623,8878,11315,440275	AGER,APOE,APP,ATP2A2,CTNNB1,EGFR,GRM1,GSK3A,GSK3B,IL1B,INS,KRAS,MAPT,PRKN,PRKACA,PRNP,PSEN1,PTGS2,SNCA,SNCG,SQSTM1,PARK7,EIF2AK4
17_Member	GO Biological Processes	GO:0007268	chemical synaptic transmission	-11.3806	-9.19628	23/640	177,348,351,488,1499,1956,2911,2931,2932,3553,3630,3845,4137,5071,5566,5621,5663,5743,6622,6623,8878,11315,440275	AGER,APOE,APP,ATP2A2,CTNNB1,EGFR,GRM1,GSK3A,GSK3B,IL1B,INS,KRAS,MAPT,PRKN,PRKACA,PRNP,PSEN1,PTGS2,SNCA,SNCG,SQSTM1,PARK7,EIF2AK4
17_Member	GO Biological Processes	GO:0099537	trans-synaptic signaling	-11.3257	-9.14782	23/644	177,348,351,488,1499,1956,2911,2931,2932,3553,3630,3845,4137,5071,5566,5621,5663,5743,6622,6623,8878,11315,440275	AGER,APOE,APP,ATP2A2,CTNNB1,EGFR,GRM1,GSK3A,GSK3B,IL1B,INS,KRAS,MAPT,PRKN,PRKACA,PRNP,PSEN1,PTGS2,SNCA,SNCG,SQSTM1,PARK7,EIF2AK4
17_Member	GO Biological Processes	GO:0099536	synaptic signaling	-11.312	-9.1405	23/645	177,348,351,488,1499,1956,2911,2931,2932,3553,3630,3845,4137,5071,5566,5621,5663,5743,6622,6623,8878,11315,440275	AGER,APOE,APP,ATP2A2,CTNNB1,EGFR,GRM1,GSK3A,GSK3B,IL1B,INS,KRAS,MAPT,PRKN,PRKACA,PRNP,PSEN1,PTGS2,SNCA,SNCG,SQSTM1,PARK7,EIF2AK4
17_Member	GO Biological Processes	GO:0048167	regulation of synaptic plasticity	-9.27538	-7.37224	12/173	177,348,351,3630,3845,4137,5621,5663,5743,6622,8878,440275	AGER,APOE,APP,INS,KRAS,MAPT,PRNP,PSEN1,PTGS2,SNCA,SQSTM1,EIF2AK4
17_Member	GO Biological Processes	GO:0007613	memory	-8.84107	-6.99952	10/113	348,2475,3553,3643,4137,5621,5663,5743,11202,440275	APOE,MTOR,IL1B,INSR,MAPT,PRNP,PSEN1,PTGS2,KLK8,EIF2AK4
17_Member	GO Biological Processes	GO:1900271	regulation of long-term synaptic potentiation	-8.79323	-6.95461	7/36	177,348,351,3630,5621,8878,440275	AGER,APOE,APP,INS,PRNP,SQSTM1,EIF2AK4
17_Member	GO Biological Processes	GO:0060291	long-term synaptic potentiation	-7.77321	-6.04843	8/76	177,348,351,3630,5621,6622,8878,440275	AGER,APOE,APP,INS,PRNP,SNCA,SQSTM1,EIF2AK4
17_Member	GO Biological Processes	GO:0050806	positive regulation of synaptic transmission	-7.64667	-5.94168	10/150	177,348,351,1956,3630,5621,5743,6622,8878,440275	AGER,APOE,APP,EGFR,INS,PRNP,PTGS2,SNCA,SQSTM1,EIF2AK4
17_Member	GO Biological Processes	GO:1900273	positive regulation of long-term synaptic potentiation	-5.3668	-3.95415	4/19	351,3630,8878,440275	APP,INS,SQSTM1,EIF2AK4
18_Summary	GO Biological Processes	GO:0042982	amyloid precursor protein metabolic process	-16.1664	-13.4783	12/48	274,348,351,1718,2931,5074,5621,5653,5663,5664,25825,54103,3416,8678,5562,6622,440275	BIN1,APOE,APP,DHCR24,GSK3A,PAWR,PRNP,KLK6,PSEN1,PSEN2,BACE2,GSAP,IDE,BECN1,PRKAA1,SNCA,EIF2AK4
18_Member	GO Biological Processes	GO:0042982	amyloid precursor protein metabolic process	-16.1664	-13.4783	12/48	274,348,351,1718,2931,5074,5621,5653,5663,5664,25825,54103	BIN1,APOE,APP,DHCR24,GSK3A,PAWR,PRNP,KLK6,PSEN1,PSEN2,BACE2,GSAP
18_Member	GO Biological Processes	GO:0050435	amyloid-beta metabolic process	-16.1006	-13.4227	11/35	274,348,351,2931,3416,5621,5663,5664,8678,25825,54103	BIN1,APOE,APP,GSK3A,IDE,PRNP,PSEN1,PSEN2,BECN1,BACE2,GSAP
18_Member	GO Biological Processes	GO:0042987	amyloid precursor protein catabolic process	-12.756	-10.4269	9/32	274,348,351,1718,2931,5621,5663,5664,54103	BIN1,APOE,APP,DHCR24,GSK3A,PRNP,PSEN1,PSEN2,GSAP
18_Member	GO Biological Processes	GO:0034205	amyloid-beta formation	-10.2975	-8.24377	7/23	274,348,351,2931,5621,5663,54103	BIN1,APOE,APP,GSK3A,PRNP,PSEN1,GSAP
18_Member	GO Biological Processes	GO:1902003	regulation of amyloid-beta formation	-9.16358	-7.28196	6/18	274,348,351,2931,5621,54103	BIN1,APOE,APP,GSK3A,PRNP,GSAP
18_Member	GO Biological Processes	GO:1902991	regulation of amyloid precursor protein catabolic process	-8.43874	-6.6298	6/23	274,348,351,2931,5621,54103	BIN1,APOE,APP,GSK3A,PRNP,GSAP
18_Member	GO Biological Processes	GO:1902430	negative regulation of amyloid-beta formation	-4.77616	-3.44796	3/9	274,348,5621	BIN1,APOE,PRNP
18_Member	GO Biological Processes	GO:1902992	negative regulation of amyloid precursor protein catabolic process	-4.48674	-3.20231	3/11	274,348,5621	BIN1,APOE,PRNP
18_Member	GO Biological Processes	GO:0034249	negative regulation of cellular amide metabolic process	-2.94409	-1.90012	6/196	274,348,5562,5621,6622,440275	BIN1,APOE,PRKAA1,PRNP,SNCA,EIF2AK4
19_Summary	GO Biological Processes	GO:0010001	glial cell differentiation	-16.0138	-13.3556	18/192	177,274,351,1499,1956,2475,3553,3845,4035,4137,4851,5468,5534,5663,6279,6280,6647,28514,6622,348,1410,341,1950,3077,3146,488	AGER,BIN1,APP,CTNNB1,EGFR,MTOR,IL1B,KRAS,LRP1,MAPT,NOTCH1,PPARG,PPP3R1,PSEN1,S100A8,S100A9,SOD1,DLL1,SNCA,APOE,CRYAB,APOC1,EGF,HFE,HMGB1,ATP2A2
19_Member	GO Biological Processes	GO:0010001	glial cell differentiation	-16.0138	-13.3556	18/192	177,274,351,1499,1956,2475,3553,3845,4035,4137,4851,5468,5534,5663,6279,6280,6647,28514	AGER,BIN1,APP,CTNNB1,EGFR,MTOR,IL1B,KRAS,LRP1,MAPT,NOTCH1,PPARG,PPP3R1,PSEN1,S100A8,S100A9,SOD1,DLL1
19_Member	GO Biological Processes	GO:0048708	astrocyte differentiation	-15.82	-13.1839	13/68	177,274,351,1956,3553,3845,4035,4137,4851,5663,6279,6280,28514	AGER,BIN1,APP,EGFR,IL1B,KRAS,LRP1,MAPT,NOTCH1,PSEN1,S100A8,S100A9,DLL1
19_Member	GO Biological Processes	GO:0014002	astrocyte development	-14.9754	-12.4769	10/30	177,351,1956,3845,4035,4137,5663,6279,6280,28514	AGER,APP,EGFR,KRAS,LRP1,MAPT,PSEN1,S100A8,S100A9,DLL1
19_Member	GO Biological Processes	GO:0042063	gliogenesis	-13.7227	-11.3304	18/259	177,274,351,1499,1956,2475,3553,3845,4035,4137,4851,5468,5534,5663,6279,6280,6647,28514	AGER,BIN1,APP,CTNNB1,EGFR,MTOR,IL1B,KRAS,LRP1,MAPT,NOTCH1,PPARG,PPP3R1,PSEN1,S100A8,S100A9,SOD1,DLL1
19_Member	GO Biological Processes	GO:0021782	glial cell development	-12.5457	-10.2256	12/92	177,351,1956,3845,4035,4137,5534,5663,6279,6280,6647,28514	AGER,APP,EGFR,KRAS,LRP1,MAPT,PPP3R1,PSEN1,S100A8,S100A9,SOD1,DLL1
19_Member	GO Biological Processes	GO:0048143	astrocyte activation	-10.4539	-8.38054	6/12	177,351,1956,4035,4137,5663	AGER,APP,EGFR,LRP1,MAPT,PSEN1
19_Member	GO Biological Processes	GO:0150076	neuroinflammatory response	-9.17912	-7.29588	7/32	177,351,1956,4035,4137,5663,6622	AGER,APP,EGFR,LRP1,MAPT,PSEN1,SNCA
19_Member	GO Biological Processes	GO:0061900	glial cell activation	-9.17912	-7.29588	7/32	177,351,1956,4035,4137,5663,6622	AGER,APP,EGFR,LRP1,MAPT,PSEN1,SNCA
19_Member	GO Biological Processes	GO:1990000	amyloid fibril formation	-7.70754	-5.99387	5/15	348,351,1410,4137,5663	APOE,APP,CRYAB,MAPT,PSEN1
19_Member	GO Biological Processes	GO:1905906	regulation of amyloid fibril formation	-7.08804	-5.46151	4/8	348,351,1410,5663	APOE,APP,CRYAB,PSEN1
19_Member	GO Biological Processes	GO:0002265	astrocyte activation involved in immune response	-6.68907	-5.10443	3/3	351,4035,5663	APP,LRP1,PSEN1
19_Member	GO Biological Processes	GO:1905908	positive regulation of amyloid fibril formation	-6.08891	-4.56923	3/4	348,351,5663	APOE,APP,PSEN1
19_Member	GO Biological Processes	GO:0048259	regulation of receptor-mediated endocytosis	-3.81383	-2.63214	5/85	341,351,1950,3077,5663	APOC1,APP,EGF,HFE,PSEN1
19_Member	GO Biological Processes	GO:0045806	negative regulation of endocytosis	-3.55648	-2.42159	4/53	341,351,3146,5663	APOC1,APP,HMGB1,PSEN1
19_Member	GO Biological Processes	GO:0032469	endoplasmic reticulum calcium ion homeostasis	-3.53749	-2.40624	3/22	351,488,5663	APP,ATP2A2,PSEN1
19_Member	GO Biological Processes	GO:0048261	negative regulation of receptor-mediated endocytosis	-3.53749	-2.40624	3/22	341,351,5663	APOC1,APP,PSEN1
19_Member	GO Biological Processes	GO:1902905	positive regulation of supramolecular fiber organization	-2.92147	-1.88119	6/198	274,348,351,2475,4137,5663	BIN1,APOE,APP,MTOR,MAPT,PSEN1
20_Summary	KEGG Pathway	hsa05010	Alzheimer's disease	-15.5725	-12.9601	17/171	102,348,351,488,823,2932,3416,3553,4035,4137,5534,5663,5664,6622,6868,7124,25825,4898	ADAM10,APOE,APP,ATP2A2,CAPN1,GSK3B,IDE,IL1B,LRP1,MAPT,PPP3R1,PSEN1,PSEN2,SNCA,ADAM17,TNF,BACE2,NRDC
20_Member	KEGG Pathway	hsa05010	Alzheimer's disease	-15.5725	-12.9601	17/171	102,348,351,488,823,2932,3416,3553,4035,4137,5534,5663,5664,6622,6868,7124,25825	ADAM10,APOE,APP,ATP2A2,CAPN1,GSK3B,IDE,IL1B,LRP1,MAPT,PPP3R1,PSEN1,PSEN2,SNCA,ADAM17,TNF,BACE2
20_Member	GO Biological Processes	GO:0006509	membrane protein ectodomain proteolysis	-11.2847	-9.12253	9/45	102,348,3553,4898,5663,5664,6868,7124,25825	ADAM10,APOE,IL1B,NRDC,PSEN1,PSEN2,ADAM17,TNF,BACE2
20_Member	GO Biological Processes	GO:0033619	membrane protein proteolysis	-10.1634	-8.13987	9/59	102,348,3553,4898,5663,5664,6868,7124,25825	ADAM10,APOE,IL1B,NRDC,PSEN1,PSEN2,ADAM17,TNF,BACE2
20_Member	GO Biological Processes	GO:0051044	positive regulation of membrane protein ectodomain proteolysis	-5.81204	-4.32804	4/15	348,3553,4898,7124	APOE,IL1B,NRDC,TNF
20_Member	GO Biological Processes	GO:0051043	regulation of membrane protein ectodomain proteolysis	-5.016	-3.64912	4/23	348,3553,4898,7124	APOE,IL1B,NRDC,TNF
