# Supplementary material for: Candidate Genes and MiRNAs Linked to the Inverse Relationship Between Cancer and Alzheimer’s Disease: Insights From Data Mining and Enrichment Analysis
Source: Front Genet. 2019 Sep 24;10:846. doi: 10.3389/fgene.2019.00846 (PMC6771301; doi:10.3389/fgene.2019.00846)
Supplement: Table S5 — GO-MCODE modules (Metascape). [file Table_5.xlsx]

## Sheet: Table S5
Name	Category	CategoryID	GO	Description	LogP	Enrichment	Z-score	#TotalGeneInLibrary	#GeneInGO	#GeneInHitList	#GeneInGOAndHitList	%InGO	STDV %InGO	GeneID	Hits	Log(q-value)
Input ID	GO Biological Processes	19	GO:1901699	cellular response to nitrogen compound	-32.3054	11.9557	20.6294	23250	643	124	41	33.0645	4.22473	177|328|351|672|846|1499|1788|1956|2099|2475|2931|2932|3416|3480|3553|3630|3643|4035|4313|4314|5071|5294|5468|5562|5566|5621|5663|5743|6622|6647|6654|6895|7099|7124|7157|7351|7471|7490|9365|10891|23411	AGER|APEX1|APP|BRCA1|CASR|CTNNB1|DNMT3A|EGFR|ESR1|MTOR|GSK3A|GSK3B|IDE|IGF1R|IL1B|INS|INSR|LRP1|MMP2|MMP3|PRKN|PIK3CG|PPARG|PRKAA1|PRKACA|PRNP|PSEN1|PTGS2|SNCA|SOD1|SOS1|TARBP2|TLR4|TNF|TP53|UCP2|WNT1|WT1|KL|PPARGC1A|SIRT1	-27.994
Input ID	GO Biological Processes	19	GO:0006979	response to oxidative stress	-31.8631	15.237	22.1539	23250	443	124	36	29.0323	4.07624	328|348|351|488|1410|1499|1718|1956|3553|3569|3630|4137|4314|4968|5037|5071|5074|5562|5621|5663|5743|6622|6647|7099|7124|7157|7351|7352|7471|7515|8678|10013|10891|11315|23411|51527	APEX1|APOE|APP|ATP2A2|CRYAB|CTNNB1|DHCR24|EGFR|IL1B|IL6|INS|MAPT|MMP3|OGG1|PEBP1|PRKN|PAWR|PRKAA1|PRNP|PSEN1|PTGS2|SNCA|SOD1|TLR4|TNF|TP53|UCP2|UCP3|WNT1|XRCC1|BECN1|HDAC6|PPARGC1A|PARK7|SIRT1|GSKIP	-27.8528
Input ID	GO Biological Processes	19	GO:0071417	cellular response to organonitrogen compound	-31.3803	13.1944	20.9949	23250	540	124	38	30.6452	4.14008	177|328|351|672|846|1499|1788|1956|2475|2931|2932|3416|3480|3553|3630|3643|4035|4313|5071|5294|5468|5562|5566|5621|5663|5743|6622|6647|6654|7099|7124|7157|7351|7471|7490|9365|10891|23411	AGER|APEX1|APP|BRCA1|CASR|CTNNB1|DNMT3A|EGFR|MTOR|GSK3A|GSK3B|IDE|IGF1R|IL1B|INS|INSR|LRP1|MMP2|PRKN|PIK3CG|PPARG|PRKAA1|PRKACA|PRNP|PSEN1|PTGS2|SNCA|SOD1|SOS1|TLR4|TNF|TP53|UCP2|WNT1|WT1|KL|PPARGC1A|SIRT1	-27.546
Input ID	GO Biological Processes	19	GO:0007568	aging	-27.641	18.125	21.8606	23250	300	124	29	23.3871	3.80127	177|328|351|1029|1410|1788|2475|2931|3416|3845|4000|4035|4968|5037|5074|5621|5663|5743|6622|6647|7157|7351|7352|7471|8678|9365|10891|23410|23411	AGER|APEX1|APP|CDKN2A|CRYAB|DNMT3A|MTOR|GSK3A|IDE|KRAS|LMNA|LRP1|OGG1|PEBP1|PAWR|PRNP|PSEN1|PTGS2|SNCA|SOD1|TP53|UCP2|UCP3|WNT1|BECN1|KL|PPARGC1A|SIRT3|SIRT1	-23.9316
Input ID	GO Biological Processes	19	GO:0010942	positive regulation of cell death	-25.3264	9.92647	17.2994	23250	680	124	36	29.0323	4.07624	274|1029|1386|1499|1788|2475|2931|2932|3146|3553|3569|4035|4137|4314|4851|5074|5300|5468|5621|5663|5743|6279|6280|6622|6647|6654|7099|7124|7157|7351|8878|10013|10891|11315|23411|57805	BIN1|CDKN2A|ATF2|CTNNB1|DNMT3A|MTOR|GSK3A|GSK3B|HMGB1|IL1B|IL6|LRP1|MAPT|MMP3|NOTCH1|PAWR|PIN1|PPARG|PRNP|PSEN1|PTGS2|S100A8|S100A9|SNCA|SOD1|SOS1|TLR4|TNF|TP53|UCP2|SQSTM1|HDAC6|PPARGC1A|PARK7|SIRT1|CCAR2	-21.714
Input ID	GO Biological Processes	19	GO:0010035	response to inorganic substance	-25.0858	11.4583	18.0058	23250	540	124	33	26.6129	3.96867	328|338|351|682|846|1386|1410|1788|1956|2931|3552|3553|3569|4137|4314|4968|5037|5071|5074|5562|5621|5743|6279|6622|6647|7124|7351|7352|8678|10013|10891|11315|23411	APEX1|APOB|APP|BSG|CASR|ATF2|CRYAB|DNMT3A|EGFR|GSK3A|IL1A|IL1B|IL6|MAPT|MMP3|OGG1|PEBP1|PRKN|PAWR|PRKAA1|PRNP|PTGS2|S100A8|SNCA|SOD1|TNF|UCP2|UCP3|BECN1|HDAC6|PPARGC1A|PARK7|SIRT1	-21.5526
Input ID	GO Biological Processes	19	GO:1901652	response to peptide	-23.0841	11.7925	17.4394	23250	477	124	30	24.1935	3.84585	177|328|351|682|846|2475|2931|2932|3416|3480|3553|3630|3643|4035|4851|5465|5468|5562|5566|5621|5663|5743|6654|7099|7157|7351|7352|7471|9365|23411	AGER|APEX1|APP|BSG|CASR|MTOR|GSK3A|GSK3B|IDE|IGF1R|IL1B|INS|INSR|LRP1|NOTCH1|PPARA|PPARG|PRKAA1|PRKACA|PRNP|PSEN1|PTGS2|SOS1|TLR4|TP53|UCP2|UCP3|WNT1|KL|SIRT1	-19.6179
Input ID	GO Biological Processes	19	GO:0070997	neuron death	-22.8705	15.3785	18.8746	23250	317	124	26	20.9677	3.65567	348|351|1386|1499|1718|2475|2931|2932|3553|3845|4035|4137|5071|5300|5465|5621|5653|5663|6622|6647|7099|7471|10891|11315|23411|80823	APOE|APP|ATF2|CTNNB1|DHCR24|MTOR|GSK3A|GSK3B|IL1B|KRAS|LRP1|MAPT|PRKN|PIN1|PPARA|PRNP|KLK6|PSEN1|SNCA|SOD1|TLR4|WNT1|PPARGC1A|PARK7|SIRT1|BHLHB9	-19.4622
Input ID	GO Biological Processes	19	GO:0080135	regulation of cellular response to stress	-22.2712	9.33258	15.9393	23250	663	124	33	26.6129	3.96867	177|351|672|1029|1410|1499|1956|2475|2932|3146|3320|3480|3553|3630|3845|4077|4137|4314|4968|5071|5074|5743|5802|6647|7099|7124|7471|7515|9531|10013|11315|23411|57805	AGER|APP|BRCA1|CDKN2A|CRYAB|CTNNB1|EGFR|MTOR|GSK3B|HMGB1|HSP90AA1|IGF1R|IL1B|INS|KRAS|NBR1|MAPT|MMP3|OGG1|PRKN|PAWR|PTGS2|PTPRS|SOD1|TLR4|TNF|WNT1|XRCC1|BAG3|HDAC6|PARK7|SIRT1|CCAR2	-18.9141
Input ID	GO Biological Processes	19	GO:0016049	cell growth	-21.9046	11.4233	16.8249	23250	476	124	29	23.3871	3.80127	102|348|351|1029|1410|1499|1956|2100|2475|2931|2932|3320|3621|3630|4137|5071|5300|5468|5654|5802|6279|6280|6868|7157|7490|10013|10519|23411|57805	ADAM10|APOE|APP|CDKN2A|CRYAB|CTNNB1|EGFR|ESR2|MTOR|GSK3A|GSK3B|HSP90AA1|ING1|INS|MAPT|PRKN|PIN1|PPARG|HTRA1|PTPRS|S100A8|S100A9|ADAM17|TP53|WT1|HDAC6|CIB1|SIRT1|CCAR2	-18.5932
Input ID	GO Biological Processes	19	GO:2000377	regulation of reactive oxygen species metabolic process	-21.8342	22.2458	20.7764	23250	177	124	21	16.9355	3.36818	672|1410|1956|2475|3320|3553|3630|3643|4137|4314|5071|5743|6622|6647|7099|7124|7157|8678|10013|11315|23410	BRCA1|CRYAB|EGFR|MTOR|HSP90AA1|IL1B|INS|INSR|MAPT|MMP3|PRKN|PTGS2|SNCA|SOD1|TLR4|TNF|TP53|BECN1|HDAC6|PARK7|SIRT3	-18.5643
Input ID	GO Biological Processes	19	GO:0031329	regulation of cellular catabolic process	-21.7165	8.52273	15.3136	23250	748	124	34	27.4194	4.00616	328|341|348|823|1950|2475|2931|2932|3146|3320|3553|3630|3643|4035|4137|4898|5071|5294|5465|5562|5566|5663|6622|7124|7345|7471|8678|9638|10013|10273|10891|11315|23411|57805	APEX1|APOC1|APOE|CAPN1|EGF|MTOR|GSK3A|GSK3B|HMGB1|HSP90AA1|IL1B|INS|INSR|LRP1|MAPT|NRDC|PRKN|PIK3CG|PPARA|PRKAA1|PRKACA|PSEN1|SNCA|TNF|UCHL1|WNT1|BECN1|FEZ1|HDAC6|STUB1|PPARGC1A|PARK7|SIRT1|CCAR2	-18.4843
Input ID	GO Biological Processes	19	GO:1901214	regulation of neuron death	-21.4714	15.9574	18.5047	23250	282	124	24	19.3548	3.54791	348|1386|1499|1718|2475|2931|2932|3553|3845|4035|4137|5071|5300|5465|5621|5663|6622|6647|7099|7471|10891|11315|23411|80823	APOE|ATF2|CTNNB1|DHCR24|MTOR|GSK3A|GSK3B|IL1B|KRAS|LRP1|MAPT|PRKN|PIN1|PPARA|PRNP|PSEN1|SNCA|SOD1|TLR4|WNT1|PPARGC1A|PARK7|SIRT1|BHLHB9	-18.274
Input ID	GO Biological Processes	19	GO:0040008	regulation of growth	-20.8318	8.82353	15.1619	23250	680	124	32	25.8065	3.92949	102|348|351|1029|1410|1956|2100|2475|2931|2932|3621|3630|3643|4137|4851|5071|5300|5468|5654|5802|6279|6280|6647|6868|7124|7157|7490|8878|10519|23411|28514|57805	ADAM10|APOE|APP|CDKN2A|CRYAB|EGFR|ESR2|MTOR|GSK3A|GSK3B|ING1|INS|INSR|MAPT|NOTCH1|PRKN|PIN1|PPARG|HTRA1|PTPRS|S100A8|S100A9|SOD1|ADAM17|TNF|TP53|WT1|SQSTM1|CIB1|SIRT1|DLL1|CCAR2	-17.7246
Input ID	GO Biological Processes	19	GO:0009266	response to temperature stimulus	-20.3814	19.0217	19.0711	23250	207	124	21	16.9355	3.36818	1410|2475|2932|3313|3320|3552|3553|4137|5037|5468|5562|5566|5743|6647|7351|7352|9531|10273|10891|23411|57805	CRYAB|MTOR|GSK3B|HSPA9|HSP90AA1|IL1A|IL1B|MAPT|PEBP1|PPARG|PRKAA1|PRKACA|PTGS2|SOD1|UCP2|UCP3|BAG3|STUB1|PPARGC1A|SIRT1|CCAR2	-17.3004
Input ID	GO Biological Processes	19	GO:0051347	positive regulation of transferase activity	-20.1497	8.82018	14.9126	23250	659	124	31	25	3.88857	151|177|1499|1950|1956|2475|2911|2931|3146|3320|3480|3553|3630|3643|3845|4137|5294|5300|5562|5566|5621|5663|6622|6647|6868|7099|7124|10273|10519|11315|23411	ADRA2B|AGER|CTNNB1|EGF|EGFR|MTOR|GRM1|GSK3A|HMGB1|HSP90AA1|IGF1R|IL1B|INS|INSR|KRAS|MAPT|PIK3CG|PIN1|PRKAA1|PRKACA|PRNP|PSEN1|SNCA|SOD1|ADAM17|TLR4|TNF|STUB1|CIB1|PARK7|SIRT1	-17.0983
Input ID	GO Biological Processes	19	GO:0045859	regulation of protein kinase activity	-20.0875	7.93269	14.4215	23250	780	124	33	26.6129	3.96867	151|177|348|351|1029|1030|1950|1956|2475|2911|3146|3320|3480|3553|3630|3643|3845|5294|5562|5566|5621|5663|6622|6647|6868|6895|7099|7124|7345|10519|11315|23411|51527	ADRA2B|AGER|APOE|APP|CDKN2A|CDKN2B|EGF|EGFR|MTOR|GRM1|HMGB1|HSP90AA1|IGF1R|IL1B|INS|INSR|KRAS|PIK3CG|PRKAA1|PRKACA|PRNP|PSEN1|SNCA|SOD1|ADAM17|TARBP2|TLR4|TNF|UCHL1|CIB1|PARK7|SIRT1|GSKIP	-17.0983
Input ID	GO Biological Processes	19	GO:0030162	regulation of proteolysis	-20.0875	7.93269	14.4215	23250	780	124	33	26.6129	3.96867	274|348|351|1410|1718|1950|2537|2931|2932|3146|3416|3553|3630|4137|4898|5037|5071|5468|5566|5621|5663|5743|6279|6280|6622|7124|7471|10013|10273|11315|23411|54103|57805	BIN1|APOE|APP|CRYAB|DHCR24|EGF|IFI6|GSK3A|GSK3B|HMGB1|IDE|IL1B|INS|MAPT|NRDC|PEBP1|PRKN|PPARG|PRKACA|PRNP|PSEN1|PTGS2|S100A8|S100A9|SNCA|TNF|WNT1|HDAC6|STUB1|PARK7|SIRT1|GSAP|CCAR2	-17.0983
Input ID	GO Biological Processes	19	GO:0043086	negative regulation of catalytic activity	-20.0875	7.93269	14.4215	23250	780	124	33	26.6129	3.96867	274|341|348|351|1029|1030|1410|1718|2537|2931|2932|3480|3553|3630|4137|4851|5037|5071|5468|5621|5663|5743|6622|6895|7124|7157|7345|10013|10519|11315|23411|51527|57805	BIN1|APOC1|APOE|APP|CDKN2A|CDKN2B|CRYAB|DHCR24|IFI6|GSK3A|GSK3B|IGF1R|IL1B|INS|MAPT|NOTCH1|PEBP1|PRKN|PPARG|PRNP|PSEN1|PTGS2|SNCA|TARBP2|TNF|TP53|UCHL1|HDAC6|CIB1|PARK7|SIRT1|GSKIP|CCAR2	-17.0983
Input ID	GO Biological Processes	19	GO:0034599	cellular response to oxidative stress	-20.0093	15.0787	17.5422	23250	286	124	23	18.5484	3.49054	328|488|1499|1956|3569|3630|4137|4314|5071|5074|5562|6622|6647|7099|7124|7157|7471|8678|10013|10891|11315|23411|51527	APEX1|ATP2A2|CTNNB1|EGFR|IL6|INS|MAPT|MMP3|PRKN|PAWR|PRKAA1|SNCA|SOD1|TLR4|TNF|TP53|WNT1|BECN1|HDAC6|PPARGC1A|PARK7|SIRT1|GSKIP	-17.0404
Input ID	GO Biological Processes	19	GO:0043068	positive regulation of programmed cell death	-19.7037	8.98562	14.8311	23250	626	124	30	24.1935	3.84585	274|1029|1386|1499|2931|2932|3146|3553|3569|4137|4851|5074|5300|5468|5621|5663|5743|6279|6280|6622|6647|6654|7124|7157|8878|10013|10891|11315|23411|57805	BIN1|CDKN2A|ATF2|CTNNB1|GSK3A|GSK3B|HMGB1|IL1B|IL6|MAPT|NOTCH1|PAWR|PIN1|PPARG|PRNP|PSEN1|PTGS2|S100A8|S100A9|SNCA|SOD1|SOS1|TNF|TP53|SQSTM1|HDAC6|PPARGC1A|PARK7|SIRT1|CCAR2	-16.754
Input ID	GO Biological Processes	19	GO:0070482	response to oxygen levels	-19.521	13.1965	16.6139	23250	341	124	24	19.3548	3.54791	177|846|1410|1788|1789|2475|3553|4000|4313|4851|5465|5468|5562|5664|5743|6868|7157|7351|7352|7515|8678|10273|10891|23411	AGER|CASR|CRYAB|DNMT3A|DNMT3B|MTOR|IL1B|LMNA|MMP2|NOTCH1|PPARA|PPARG|PRKAA1|PSEN2|PTGS2|ADAM17|TP53|UCP2|UCP3|XRCC1|BECN1|STUB1|PPARGC1A|SIRT1	-16.5898
Input ID	GO Biological Processes	19	GO:0031400	negative regulation of protein modification process	-19.4069	9.27901	14.8635	23250	586	124	29	23.3871	3.80127	348|672|1029|1030|1499|1789|2475|2932|3480|3553|4137|5037|5071|5300|5562|5621|5663|6622|6895|7099|7124|7345|7515|10519|10891|11315|23410|23411|51527	APOE|BRCA1|CDKN2A|CDKN2B|CTNNB1|DNMT3B|MTOR|GSK3B|IGF1R|IL1B|MAPT|PEBP1|PRKN|PIN1|PRKAA1|PRNP|PSEN1|SNCA|TARBP2|TLR4|TNF|UCHL1|XRCC1|CIB1|PPARGC1A|PARK7|SIRT3|SIRT1|GSKIP	-16.4935
Input ID	GO Biological Processes	19	GO:0072593	reactive oxygen species metabolic process	-19.3655	15.4494	17.3887	23250	267	124	22	17.7419	3.43067	672|1410|1956|2475|3320|3553|3630|3643|4137|4314|5071|5743|6622|6647|7099|7124|7157|8678|9644|10013|11315|23410	BRCA1|CRYAB|EGFR|MTOR|HSP90AA1|IL1B|INS|INSR|MAPT|MMP3|PRKN|PTGS2|SNCA|SOD1|TLR4|TNF|TP53|BECN1|SH3PXD2A|HDAC6|PARK7|SIRT3	-16.4691
Input ID	GO Biological Processes	19	GO:0001666	response to hypoxia	-19.2804	14.0016	16.8198	23250	308	124	23	18.5484	3.49054	177|846|1410|1788|1789|2475|3553|4000|4313|4851|5465|5562|5664|5743|6868|7157|7351|7352|7515|8678|10273|10891|23411	AGER|CASR|CRYAB|DNMT3A|DNMT3B|MTOR|IL1B|LMNA|MMP2|NOTCH1|PPARA|PRKAA1|PSEN2|PTGS2|ADAM17|TP53|UCP2|UCP3|XRCC1|BECN1|STUB1|PPARGC1A|SIRT1	-16.4004
Input ID	GO Biological Processes	19	GO:1901653	cellular response to peptide	-19.2563	12.8571	16.3666	23250	350	124	24	19.3548	3.54791	177|328|351|846|2931|2932|3416|3480|3553|3630|3643|4035|5468|5562|5566|5621|5663|6654|7099|7157|7351|7471|9365|23411	AGER|APEX1|APP|CASR|GSK3A|GSK3B|IDE|IGF1R|IL1B|INS|INSR|LRP1|PPARG|PRKAA1|PRKACA|PRNP|PSEN1|SOS1|TLR4|TP53|UCP2|WNT1|KL|SIRT1	-16.3921
Input ID	GO Biological Processes	19	GO:0036293	response to decreased oxygen levels	-18.9678	13.5613	16.5155	23250	318	124	23	18.5484	3.49054	177|846|1410|1788|1789|2475|3553|4000|4313|4851|5465|5562|5664|5743|6868|7157|7351|7352|7515|8678|10273|10891|23411	AGER|CASR|CRYAB|DNMT3A|DNMT3B|MTOR|IL1B|LMNA|MMP2|NOTCH1|PPARA|PRKAA1|PSEN2|PTGS2|ADAM17|TP53|UCP2|UCP3|XRCC1|BECN1|STUB1|PPARGC1A|SIRT1	-16.1188
Input ID	GO Biological Processes	19	GO:0001558	regulation of cell growth	-18.8339	11.4329	15.6068	23250	410	124	25	20.1613	3.60292	102|348|1029|1410|1956|2100|2475|2931|2932|3621|3630|4137|5071|5300|5468|5654|5802|6279|6280|6868|7157|7490|10519|23411|57805	ADAM10|APOE|CDKN2A|CRYAB|EGFR|ESR2|MTOR|GSK3A|GSK3B|ING1|INS|MAPT|PRKN|PIN1|PPARG|HTRA1|PTPRS|S100A8|S100A9|ADAM17|TP53|WT1|CIB1|SIRT1|CCAR2	-15.9996
Input ID	GO Biological Processes	19	GO:0043065	positive regulation of apoptotic process	-18.7393	8.77016	14.3597	23250	620	124	29	23.3871	3.80127	274|1029|1386|1499|2931|2932|3146|3553|3569|4137|4851|5074|5300|5468|5621|5663|5743|6279|6280|6622|6647|6654|7124|7157|8878|10891|11315|23411|57805	BIN1|CDKN2A|ATF2|CTNNB1|GSK3A|GSK3B|HMGB1|IL1B|IL6|MAPT|NOTCH1|PAWR|PIN1|PPARG|PRNP|PSEN1|PTGS2|S100A8|S100A9|SNCA|SOD1|SOS1|TNF|TP53|SQSTM1|PPARGC1A|PARK7|SIRT1|CCAR2	-15.9193
Input ID	GO Biological Processes	19	GO:0062012	regulation of small molecule metabolic process	-18.4894	12.9117	16.0561	23250	334	124	23	18.5484	3.49054	338|341|348|672|1950|2475|2931|2932|3146|3553|3630|3643|5071|5465|5468|5562|5743|6622|6647|7124|10891|11315|23411	APOB|APOC1|APOE|BRCA1|EGF|MTOR|GSK3A|GSK3B|HMGB1|IL1B|INS|INSR|PRKN|PPARA|PPARG|PRKAA1|PTGS2|SNCA|SOD1|TNF|PPARGC1A|PARK7|SIRT1	-15.6832
Input ID	GO Biological Processes	19	GO:0060341	regulation of cellular localization	-17.7901	7.30214	13.2483	23250	796	124	31	25	3.88857	488|1410|1499|1950|1956|2931|2932|3320|3553|3630|4000|4035|4137|5071|5300|5562|5566|5621|5663|5743|6622|7124|7157|7351|8678|8878|9531|9638|10519|11315|23411	ATP2A2|CRYAB|CTNNB1|EGF|EGFR|GSK3A|GSK3B|HSP90AA1|IL1B|INS|LMNA|LRP1|MAPT|PRKN|PIN1|PRKAA1|PRKACA|PRNP|PSEN1|PTGS2|SNCA|TNF|TP53|UCP2|BECN1|SQSTM1|BAG3|FEZ1|CIB1|PARK7|SIRT1	-14.9973
Input ID	GO Biological Processes	19	GO:0051129	negative regulation of cellular component organization	-17.7073	8.03176	13.5965	23250	677	124	29	23.3871	3.80127	341|348|351|672|1410|1789|2931|2932|3146|3630|4000|4035|4137|4851|5071|5621|5663|5802|6622|7124|7515|8678|9531|9638|10013|10519|10891|11315|23411	APOC1|APOE|APP|BRCA1|CRYAB|DNMT3B|GSK3A|GSK3B|HMGB1|INS|LMNA|LRP1|MAPT|NOTCH1|PRKN|PRNP|PSEN1|PTPRS|SNCA|TNF|XRCC1|BECN1|BAG3|FEZ1|HDAC6|CIB1|PPARGC1A|PARK7|SIRT1	-14.9274
Input ID	GO Biological Processes	19	GO:0010563	negative regulation of phosphorus metabolic process	-17.6113	8.92857	13.9958	23250	567	124	27	21.7742	3.70625	341|348|1029|1030|2475|2931|2932|3480|3553|4137|5037|5071|5300|5465|5621|5663|6622|6895|7099|7124|7345|10519|10891|11315|23410|23411|51527	APOC1|APOE|CDKN2A|CDKN2B|MTOR|GSK3A|GSK3B|IGF1R|IL1B|MAPT|PEBP1|PRKN|PIN1|PPARA|PRNP|PSEN1|SNCA|TARBP2|TLR4|TNF|UCHL1|CIB1|PPARGC1A|PARK7|SIRT3|SIRT1|GSKIP	-14.844
Input ID	GO Biological Processes	19	GO:0032870	cellular response to hormone stimulus	-17.4351	7.84632	13.3982	23250	693	124	29	23.3871	3.80127	328|338|672|1499|1789|1956|2099|2100|2931|3416|3480|3553|3630|3643|4851|5465|5468|5562|5566|6654|7351|7352|7471|7490|9365|10013|10891|11315|23411	APEX1|APOB|BRCA1|CTNNB1|DNMT3B|EGFR|ESR1|ESR2|GSK3A|IDE|IGF1R|IL1B|INS|INSR|NOTCH1|PPARA|PPARG|PRKAA1|PRKACA|SOS1|UCP2|UCP3|WNT1|WT1|KL|HDAC6|PPARGC1A|PARK7|SIRT1	-14.692
Input ID	GO Biological Processes	19	GO:0033674	positive regulation of kinase activity	-17.2498	8.63908	13.7146	23250	586	124	27	21.7742	3.70625	151|177|1950|1956|2475|2911|3146|3320|3480|3553|3630|3643|3845|4137|5294|5562|5566|5621|5663|6622|6647|6868|7099|7124|10519|11315|23411	ADRA2B|AGER|EGF|EGFR|MTOR|GRM1|HMGB1|HSP90AA1|IGF1R|IL1B|INS|INSR|KRAS|MAPT|PIK3CG|PRKAA1|PRKACA|PRNP|PSEN1|SNCA|SOD1|ADAM17|TLR4|TNF|CIB1|PARK7|SIRT1	-14.5182
Input ID	GO Biological Processes	19	GO:0043408	regulation of MAPK cascade	-17.1998	7.30519	13.0289	23250	770	124	30	24.1935	3.84585	151|177|348|351|1499|1950|1956|2911|3146|3480|3553|3569|3630|3643|3845|4077|4851|5037|5071|5294|5300|5562|5663|6647|7099|7124|7345|9365|10519|23410	ADRA2B|AGER|APOE|APP|CTNNB1|EGF|EGFR|GRM1|HMGB1|IGF1R|IL1B|IL6|INS|INSR|KRAS|NBR1|NOTCH1|PEBP1|PRKN|PIK3CG|PIN1|PRKAA1|PSEN1|SOD1|TLR4|TNF|UCHL1|KL|CIB1|SIRT3	-14.4795
Input ID	GO Biological Processes	19	GO:0031331	positive regulation of cellular catabolic process	-17.1606	12.2041	15.1939	23250	338	124	22	17.7419	3.43067	348|1950|2931|2932|3146|3320|3553|3630|3643|4035|4898|5071|5465|5562|5663|6622|7124|8678|10013|10273|11315|23411	APOE|EGF|GSK3A|GSK3B|HMGB1|HSP90AA1|IL1B|INS|INSR|LRP1|NRDC|PRKN|PPARA|PRKAA1|PSEN1|SNCA|TNF|BECN1|HDAC6|STUB1|PARK7|SIRT1	-14.4513
Input ID	GO Biological Processes	19	GO:1903827	regulation of cellular protein localization	-17.0947	9.66495	14.121	23250	485	124	25	20.1613	3.60292	1499|1950|1956|2931|2932|3320|3553|3630|4000|4035|4137|5071|5300|5562|5566|5621|5663|5743|7124|7157|8878|9531|10519|11315|23411	CTNNB1|EGF|EGFR|GSK3A|GSK3B|HSP90AA1|IL1B|INS|LMNA|LRP1|MAPT|PRKN|PIN1|PRKAA1|PRKACA|PRNP|PSEN1|PTGS2|TNF|TP53|SQSTM1|BAG3|CIB1|PARK7|SIRT1	-14.3961
Input ID	GO Biological Processes	19	GO:0035690	cellular response to drug	-17.079	12.0968	15.1159	23250	341	124	22	17.7419	3.43067	328|672|1499|1788|1789|1956|3553|3569|4314|5071|5074|5562|5621|5743|6647|7124|7157|8678|10013|10891|11315|23411	APEX1|BRCA1|CTNNB1|DNMT3A|DNMT3B|EGFR|IL1B|IL6|MMP3|PRKN|PAWR|PRKAA1|PRNP|PTGS2|SOD1|TNF|TP53|BECN1|HDAC6|PPARGC1A|PARK7|SIRT1	-14.3909
Input ID	GO Biological Processes	19	GO:0010001	glial cell differentiation	-16.8664	17.5781	16.8903	23250	192	124	18	14.5161	3.16342	177|274|351|1499|1956|2475|3553|3845|4035|4137|4851|5468|5534|5663|6279|6280|6647|28514	AGER|BIN1|APP|CTNNB1|EGFR|MTOR|IL1B|KRAS|LRP1|MAPT|NOTCH1|PPARG|PPP3R1|PSEN1|S100A8|S100A9|SOD1|DLL1	-14.1885
Input ID	GO Biological Processes	19	GO:0009896	positive regulation of catabolic process	-16.8005	10.8354	14.4922	23250	398	124	23	18.5484	3.49054	348|1950|2931|2932|3146|3320|3416|3553|3630|3643|4035|4898|5071|5465|5562|5663|6622|7124|8678|10013|10273|11315|23411	APOE|EGF|GSK3A|GSK3B|HMGB1|HSP90AA1|IDE|IL1B|INS|INSR|LRP1|NRDC|PRKN|PPARA|PRKAA1|PSEN1|SNCA|TNF|BECN1|HDAC6|STUB1|PARK7|SIRT1	-14.1416
Input ID	GO Biological Processes	19	GO:0000302	response to reactive oxygen species	-16.7903	15.5568	16.21	23250	229	124	19	15.3226	3.23474	328|348|1410|1956|3553|3569|4137|4314|5074|5562|6647|7124|7351|7352|8678|10013|10891|11315|23411	APEX1|APOE|CRYAB|EGFR|IL1B|IL6|MAPT|MMP3|PAWR|PRKAA1|SOD1|TNF|UCP2|UCP3|BECN1|HDAC6|PPARGC1A|PARK7|SIRT1	-14.1416
Input ID	GO Biological Processes	19	GO:0042982	amyloid precursor protein metabolic process	-16.7401	46.875	23.2968	23250	48	124	12	9.67742	2.65502	274|348|351|1718|2931|5074|5621|5653|5663|5664|25825|54103	BIN1|APOE|APP|DHCR24|GSK3A|PAWR|PRNP|KLK6|PSEN1|PSEN2|BACE2|GSAP	-14.1009
Input ID	GO Biological Processes	19	GO:0050435	amyloid-beta metabolic process	-16.6265	58.9286	25.1134	23250	35	124	11	8.87097	2.55331	274|348|351|2931|3416|5621|5663|5664|8678|25825|54103	BIN1|APOE|APP|GSK3A|IDE|PRNP|PSEN1|PSEN2|BECN1|BACE2|GSAP	-13.9964
Input ID	GO Biological Processes	19	GO:0090087	regulation of peptide transport	-16.5704	7.67544	12.9761	23250	684	124	28	22.5806	3.75476	846|1956|2931|2932|3146|3552|3553|3569|3630|4035|4826|5071|5562|5566|5621|5663|5743|6279|6280|7099|7124|7157|7351|9531|10519|11315|23410|23411	CASR|EGFR|GSK3A|GSK3B|HMGB1|IL1A|IL1B|IL6|INS|LRP1|NNAT|PRKN|PRKAA1|PRKACA|PRNP|PSEN1|PTGS2|S100A8|S100A9|TLR4|TNF|TP53|UCP2|BAG3|CIB1|PARK7|SIRT3|SIRT1	-13.9634
Input ID	GO Biological Processes	19	GO:0045936	negative regulation of phosphate metabolic process	-16.5672	8.61307	13.4268	23250	566	124	26	20.9677	3.65567	341|348|1029|1030|2475|2932|3480|3553|4137|5037|5071|5300|5465|5621|5663|6622|6895|7099|7124|7345|10519|10891|11315|23410|23411|51527	APOC1|APOE|CDKN2A|CDKN2B|MTOR|GSK3B|IGF1R|IL1B|MAPT|PEBP1|PRKN|PIN1|PPARA|PRNP|PSEN1|SNCA|TARBP2|TLR4|TNF|UCHL1|CIB1|PPARGC1A|PARK7|SIRT3|SIRT1|GSKIP	-13.9634
Input ID	GO Biological Processes	19	GO:0048708	astrocyte differentiation	-16.4402	35.8456	21.0712	23250	68	124	13	10.4839	2.75106	177|274|351|1956|3553|3845|4035|4137|4851|5663|6279|6280|28514	AGER|BIN1|APP|EGFR|IL1B|KRAS|LRP1|MAPT|NOTCH1|PSEN1|S100A8|S100A9|DLL1	-13.8448
Input ID	GO Biological Processes	19	GO:0070201	regulation of establishment of protein localization	-16.4243	7.57576	12.8687	23250	693	124	28	22.5806	3.75476	846|1956|2931|2932|3146|3552|3553|3569|3630|4035|4137|4826|5071|5562|5566|5621|5663|5743|7099|7124|7157|7351|9531|10013|10519|11315|23410|23411	CASR|EGFR|GSK3A|GSK3B|HMGB1|IL1A|IL1B|IL6|INS|LRP1|MAPT|NNAT|PRKN|PRKAA1|PRKACA|PRNP|PSEN1|PTGS2|TLR4|TNF|TP53|UCP2|BAG3|HDAC6|CIB1|PARK7|SIRT3|SIRT1	-13.8372
Input ID	GO Biological Processes	19	GO:0097190	apoptotic signaling pathway	-16.383	8.46354	13.2817	23250	576	124	26	20.9677	3.65567	672|1499|2537|2931|2932|3552|3553|3630|4000|5071|5074|5663|5743|6279|6280|6647|7099|7124|7157|9531|10519|11315|23411|51527|57805|83941	BRCA1|CTNNB1|IFI6|GSK3A|GSK3B|IL1A|IL1B|INS|LMNA|PRKN|PAWR|PSEN1|PTGS2|S100A8|S100A9|SOD1|TLR4|TNF|TP53|BAG3|CIB1|PARK7|SIRT1|GSKIP|CCAR2|TM2D1	-13.8213
Input ID	GO Biological Processes	19	GO:0071407	cellular response to organic cyclic compound	-16.383	8.46354	13.2817	23250	576	124	26	20.9677	3.65567	328|351|672|846|1499|1789|1956|2099|2100|2931|3553|5071|5294|5465|5468|5566|5743|6622|6647|6895|7124|7490|10013|10891|11315|23411	APEX1|APP|BRCA1|CASR|CTNNB1|DNMT3B|EGFR|ESR1|ESR2|GSK3A|IL1B|PRKN|PIK3CG|PPARA|PPARG|PRKACA|PTGS2|SNCA|SOD1|TARBP2|TNF|WT1|HDAC6|PPARGC1A|PARK7|SIRT1	-13.8213
Input ID	GO Biological Processes	19	GO:0045860	positive regulation of protein kinase activity	-16.3829	9.01442	13.5343	23250	520	124	25	20.1613	3.60292	151|177|1950|1956|2475|2911|3146|3320|3553|3630|3643|3845|5294|5562|5566|5621|5663|6622|6647|6868|7099|7124|10519|11315|23411	ADRA2B|AGER|EGF|EGFR|MTOR|GRM1|HMGB1|HSP90AA1|IL1B|INS|INSR|KRAS|PIK3CG|PRKAA1|PRKACA|PRNP|PSEN1|SNCA|SOD1|ADAM17|TLR4|TNF|CIB1|PARK7|SIRT1	-13.8213
Input ID	KEGG Pathway	24	hsa05010	Alzheimer's disease	-16.3768	18.6404	16.9535	23250	171	124	17	13.7097	3.08876	102|348|351|488|823|2932|3416|3553|4035|4137|5534|5663|5664|6622|6868|7124|25825	ADAM10|APOE|APP|ATP2A2|CAPN1|GSK3B|IDE|IL1B|LRP1|MAPT|PPP3R1|PSEN1|PSEN2|SNCA|ADAM17|TNF|BACE2	-13.8213
Input ID	GO Biological Processes	19	GO:0009408	response to heat	-16.3602	21.2766	17.6838	23250	141	124	16	12.9032	3.0105	1410|2475|2932|3313|3320|3552|3553|4137|5037|5566|5743|6647|9531|10273|23411|57805	CRYAB|MTOR|GSK3B|HSPA9|HSP90AA1|IL1A|IL1B|MAPT|PEBP1|PRKACA|PTGS2|SOD1|BAG3|STUB1|SIRT1|CCAR2	-13.8123
Input ID	GO Biological Processes	19	GO:0051091	positive regulation of DNA-binding transcription factor activity	-16.0447	14.1932	15.3885	23250	251	124	19	15.3226	3.23474	177|351|1386|1499|2099|2100|3553|3569|3630|3845|5468|6279|6280|7099|7124|7471|10519|10891|11315	AGER|APP|ATF2|CTNNB1|ESR1|ESR2|IL1B|IL6|INS|KRAS|PPARG|S100A8|S100A9|TLR4|TNF|WNT1|CIB1|PPARGC1A|PARK7	-13.5115
Input ID	GO Biological Processes	19	GO:0051222	positive regulation of protein transport	-15.825	10.5499	13.945	23250	391	124	22	17.7419	3.43067	846|1956|2931|2932|3146|3552|3553|3569|3630|4035|4826|5562|5566|5621|5663|5743|7099|7124|7157|9531|10519|23410	CASR|EGFR|GSK3A|GSK3B|HMGB1|IL1A|IL1B|IL6|INS|LRP1|NNAT|PRKAA1|PRKACA|PRNP|PSEN1|PTGS2|TLR4|TNF|TP53|BAG3|CIB1|SIRT3	-13.299
Input ID	GO Biological Processes	19	GO:0042326	negative regulation of phosphorylation	-15.6784	9.62612	13.4999	23250	448	124	23	18.5484	3.49054	348|1029|1030|2475|3480|3553|4137|5037|5071|5300|5465|5621|5663|6622|6895|7099|7345|10519|10891|11315|23410|23411|51527	APOE|CDKN2A|CDKN2B|MTOR|IGF1R|IL1B|MAPT|PEBP1|PRKN|PIN1|PPARA|PRNP|PSEN1|SNCA|TARBP2|TLR4|UCHL1|CIB1|PPARGC1A|PARK7|SIRT3|SIRT1|GSKIP	-13.1594
Input ID	GO Biological Processes	19	GO:0009636	response to toxic substance	-15.5507	8.85827	13.1132	23250	508	124	24	19.3548	3.54791	328|348|1410|1787|1788|1789|3553|3569|4968|5037|5071|5074|5465|5562|5743|6279|6280|6647|7124|8678|10013|10891|11315|23411	APEX1|APOE|CRYAB|TRDMT1|DNMT3A|DNMT3B|IL1B|IL6|OGG1|PEBP1|PRKN|PAWR|PPARA|PRKAA1|PTGS2|S100A8|S100A9|SOD1|TNF|BECN1|HDAC6|PPARGC1A|PARK7|SIRT1	-13.0455
Input ID	GO Biological Processes	19	GO:0051090	regulation of DNA-binding transcription factor activity	-15.5056	10.1852	13.6547	23250	405	124	22	17.7419	3.43067	177|351|1029|1386|1499|2099|2100|3553|3569|3630|3845|5468|5621|6279|6280|7099|7124|7471|10519|10891|11315|23411	AGER|APP|CDKN2A|ATF2|CTNNB1|ESR1|ESR2|IL1B|IL6|INS|KRAS|PPARG|PRNP|S100A8|S100A9|TLR4|TNF|WNT1|CIB1|PPARGC1A|PARK7|SIRT1	-13.0071
Input ID	GO Biological Processes	19	GO:0014002	astrocyte development	-15.452	62.5	24.6813	23250	30	124	10	8.06452	2.44523	177|351|1956|3845|4035|4137|5663|6279|6280|28514	AGER|APP|EGFR|KRAS|LRP1|MAPT|PSEN1|S100A8|S100A9|DLL1	-12.9602
Input ID	GO Biological Processes	19	GO:0042176	regulation of protein catabolic process	-15.421	10.9375	13.9145	23250	360	124	21	16.9355	3.36818	348|1950|1956|2931|2932|3320|3416|3553|3630|4035|4898|5071|5300|5566|5663|6622|7124|7471|10273|11315|57805	APOE|EGF|EGFR|GSK3A|GSK3B|HSP90AA1|IDE|IL1B|INS|LRP1|NRDC|PRKN|PIN1|PRKACA|PSEN1|SNCA|TNF|WNT1|STUB1|PARK7|CCAR2	-12.9357
Input ID	GO Biological Processes	19	GO:0061919	process utilizing autophagic mechanism	-15.3082	9.25429	13.1802	23250	466	124	23	18.5484	3.49054	823|2475|2931|3146|3320|4077|4137|5071|5562|5566|5663|6279|6280|6622|7157|7345|8678|8878|9638|10013|10891|11315|23411	CAPN1|MTOR|GSK3A|HMGB1|HSP90AA1|NBR1|MAPT|PRKN|PRKAA1|PRKACA|PSEN1|S100A8|S100A9|SNCA|TP53|UCHL1|BECN1|SQSTM1|FEZ1|HDAC6|PPARGC1A|PARK7|SIRT1	-12.8419
Input ID	GO Biological Processes	19	GO:0006914	autophagy	-15.3082	9.25429	13.1802	23250	466	124	23	18.5484	3.49054	823|2475|2931|3146|3320|4077|4137|5071|5562|5566|5663|6279|6280|6622|7157|7345|8678|8878|9638|10013|10891|11315|23411	CAPN1|MTOR|GSK3A|HMGB1|HSP90AA1|NBR1|MAPT|PRKN|PRKAA1|PRKACA|PSEN1|S100A8|S100A9|SNCA|TP53|UCHL1|BECN1|SQSTM1|FEZ1|HDAC6|PPARGC1A|PARK7|SIRT1	-12.8419
Input ID	GO Biological Processes	19	GO:0009895	negative regulation of catabolic process	-15.1936	12.7688	14.4813	23250	279	124	19	15.3226	3.23474	341|1956|2475|2931|3553|3630|5294|5300|5465|5562|5663|6622|7124|7471|8678|9638|10891|11315|57805	APOC1|EGFR|MTOR|GSK3A|IL1B|INS|PIK3CG|PIN1|PPARA|PRKAA1|PSEN1|SNCA|TNF|WNT1|BECN1|FEZ1|PPARGC1A|PARK7|CCAR2	-12.7335
Input ID	GO Biological Processes	19	GO:1904951	positive regulation of establishment of protein localization	-15.1339	9.77488	13.3207	23250	422	124	22	17.7419	3.43067	846|1956|2931|2932|3146|3552|3553|3569|3630|4035|4826|5562|5566|5621|5663|5743|7099|7124|7157|9531|10519|23410	CASR|EGFR|GSK3A|GSK3B|HMGB1|IL1A|IL1B|IL6|INS|LRP1|NNAT|PRKAA1|PRKACA|PRNP|PSEN1|PTGS2|TLR4|TNF|TP53|BAG3|CIB1|SIRT3	-12.6798
Input ID	Reactome Gene Sets	6	R-HSA-5663202	Diseases of signal transduction	-15.0661	10.5	13.5807	23250	375	124	21	16.9355	3.36818	102|1499|1950|1956|2099|2100|2475|2931|2932|3320|3845|4000|4851|5037|5663|5664|6654|6868|9365|10013|28514	ADAM10|CTNNB1|EGF|EGFR|ESR1|ESR2|MTOR|GSK3A|GSK3B|HSP90AA1|KRAS|LMNA|NOTCH1|PEBP1|PSEN1|PSEN2|SOS1|ADAM17|KL|HDAC6|DLL1	-12.6181
Input ID	GO Biological Processes	19	GO:0051223	regulation of protein transport	-15.0598	7.45413	12.2595	23250	654	124	26	20.9677	3.65567	846|1956|2931|2932|3146|3552|3553|3569|3630|4035|4826|5071|5562|5566|5621|5663|5743|7099|7124|7157|7351|9531|10519|11315|23410|23411	CASR|EGFR|GSK3A|GSK3B|HMGB1|IL1A|IL1B|IL6|INS|LRP1|NNAT|PRKN|PRKAA1|PRKACA|PRNP|PSEN1|PTGS2|TLR4|TNF|TP53|UCP2|BAG3|CIB1|PARK7|SIRT3|SIRT1	-12.6176
Input ID	KEGG Pathway	24	hsa04211	Longevity regulating pathway	-14.8293	27.3876	18.2633	23250	89	124	13	10.4839	2.75106	1386|2475|3480|3630|3643|3845|5468|5562|5566|7157|9365|10891|23411	ATF2|MTOR|IGF1R|INS|INSR|KRAS|PPARG|PRKAA1|PRKACA|TP53|KL|PPARGC1A|SIRT1	-12.3987
Input ID	KEGG Pathway	24	hsa05224	Breast cancer	-14.7923	19.5312	16.3338	23250	144	124	15	12.0968	2.92837	672|1499|1950|1956|2099|2100|2475|2932|3480|3845|4851|6654|7157|7471|28514	BRCA1|CTNNB1|EGF|EGFR|ESR1|ESR2|MTOR|GSK3B|IGF1R|KRAS|NOTCH1|SOS1|TP53|WNT1|DLL1	-12.3674
Input ID	GO Biological Processes	19	GO:0048545	response to steroid hormone	-14.7045	10.0703	13.2448	23250	391	124	21	16.9355	3.36818	672|1499|1789|1956|2099|2100|3146|3553|3569|3845|4851|5037|5465|5468|5743|7124|7352|10013|10891|11315|23411	BRCA1|CTNNB1|DNMT3B|EGFR|ESR1|ESR2|HMGB1|IL1B|IL6|KRAS|NOTCH1|PEBP1|PPARA|PPARG|PTGS2|TNF|UCP3|HDAC6|PPARGC1A|PARK7|SIRT1	-12.2853
Input ID	GO Biological Processes	19	GO:0051402	neuron apoptotic process	-14.6612	14.7569	14.874	23250	216	124	17	13.7097	3.08876	348|351|1386|1499|2931|3553|3845|4035|5071|5300|5621|5663|6622|6647|10891|11315|80823	APOE|APP|ATF2|CTNNB1|GSK3A|IL1B|KRAS|LRP1|PRKN|PIN1|PRNP|PSEN1|SNCA|SOD1|PPARGC1A|PARK7|BHLHB9	-12.2475
Input ID	GO Biological Processes	19	GO:0042063	gliogenesis	-14.5586	13.0309	14.2571	23250	259	124	18	14.5161	3.16342	177|274|351|1499|1956|2475|3553|3845|4035|4137|4851|5468|5534|5663|6279|6280|6647|28514	AGER|BIN1|APP|CTNNB1|EGFR|MTOR|IL1B|KRAS|LRP1|MAPT|NOTCH1|PPARG|PPP3R1|PSEN1|S100A8|S100A9|SOD1|DLL1	-12.1535
Input ID	GO Biological Processes	19	GO:0010038	response to metal ion	-14.4732	10.6534	13.3634	23250	352	124	20	16.129	3.30293	351|682|846|1788|1956|2931|3552|4137|4968|5037|5071|5562|5621|5743|6279|6622|6647|8678|10891|11315	APP|BSG|CASR|DNMT3A|EGFR|GSK3A|IL1A|MAPT|OGG1|PEBP1|PRKN|PRKAA1|PRNP|PTGS2|S100A8|SNCA|SOD1|BECN1|PPARGC1A|PARK7	-12.0757
Input ID	GO Biological Processes	19	GO:0071900	regulation of protein serine/threonine kinase activity	-14.3946	8.39008	12.4061	23250	514	124	23	18.5484	3.49054	151|177|348|1029|1030|1950|1956|2911|3480|3553|3643|3845|5294|5562|5663|6622|6647|6868|7099|7124|7345|10519|23411	ADRA2B|AGER|APOE|CDKN2A|CDKN2B|EGF|EGFR|GRM1|IGF1R|IL1B|INSR|KRAS|PIK3CG|PRKAA1|PSEN1|SNCA|SOD1|ADAM17|TLR4|TNF|UCHL1|CIB1|SIRT1	-12.0129
Input ID	GO Biological Processes	19	GO:1901215	negative regulation of neuron death	-14.3889	16.0428	15.1236	23250	187	124	16	12.9032	3.0105	348|1499|2932|3845|4035|5071|5300|5465|5663|6622|6647|7471|10891|11315|23411|80823	APOE|CTNNB1|GSK3B|KRAS|LRP1|PRKN|PIN1|PPARA|PSEN1|SNCA|SOD1|WNT1|PPARGC1A|PARK7|SIRT1|BHLHB9	-12.0129
Input ID	GO Biological Processes	19	GO:0007610	behavior	-14.3872	7.8534	12.1634	23250	573	124	24	19.3548	3.54791	177|348|351|846|1956|2475|2911|3553|3630|3643|3845|4137|5071|5465|5562|5621|5663|5743|6622|6647|7157|7345|11315|80823	AGER|APOE|APP|CASR|EGFR|MTOR|GRM1|IL1B|INS|INSR|KRAS|MAPT|PRKN|PPARA|PRKAA1|PRNP|PSEN1|PTGS2|SNCA|SOD1|TP53|UCHL1|PARK7|BHLHB9	-12.0129
Input ID	KEGG Pathway	24	hsa01522	Endocrine resistance	-14.3848	25.3906	17.5351	23250	96	124	13	10.4839	2.75106	1029|1956|2099|2100|2475|3480|3845|4313|4851|5566|6654|7157|28514	CDKN2A|EGFR|ESR1|ESR2|MTOR|IGF1R|KRAS|MMP2|NOTCH1|PRKACA|SOS1|TP53|DLL1	-12.0129
Input ID	GO Biological Processes	19	GO:2000379	positive regulation of reactive oxygen species metabolic process	-14.3848	25.3906	17.5351	23250	96	124	13	10.4839	2.75106	1956|2475|3320|3553|3643|4137|5743|6622|6647|7099|7124|7157|11315	EGFR|MTOR|HSP90AA1|IL1B|INSR|MAPT|PTGS2|SNCA|SOD1|TLR4|TNF|TP53|PARK7	-12.0129
Input ID	GO Biological Processes	19	GO:0001816	cytokine production	-14.3756	6.97425	11.7436	23250	699	124	26	20.9677	3.65567	177|351|672|1386|1499|3146|3552|3553|3569|3630|4851|5074|5294|5300|5621|5743|5802|6279|6280|6647|6868|7099|7124|11315|23411|28514	AGER|APP|BRCA1|ATF2|CTNNB1|HMGB1|IL1A|IL1B|IL6|INS|NOTCH1|PAWR|PIK3CG|PIN1|PRNP|PTGS2|PTPRS|S100A8|S100A9|SOD1|ADAM17|TLR4|TNF|PARK7|SIRT1|DLL1	-12.0087
Input ID	GO Biological Processes	19	GO:1903829	positive regulation of cellular protein localization	-14.3293	11.455	13.5919	23250	311	124	19	15.3226	3.23474	1956|2931|2932|3553|3630|4035|4137|5071|5562|5566|5621|5663|5743|7124|7157|8878|9531|10519|11315	EGFR|GSK3A|GSK3B|IL1B|INS|LRP1|MAPT|PRKN|PRKAA1|PRKACA|PRNP|PSEN1|PTGS2|TNF|TP53|SQSTM1|BAG3|CIB1|PARK7	-11.9674
Input ID	GO Biological Processes	19	GO:0034605	cellular response to heat	-14.3242	25.1289	17.4374	23250	97	124	13	10.4839	2.75106	1410|2475|2932|3313|3320|3552|4137|5566|5743|9531|10273|23411|57805	CRYAB|MTOR|GSK3B|HSPA9|HSP90AA1|IL1A|MAPT|PRKACA|PTGS2|BAG3|STUB1|SIRT1|CCAR2	-11.9671
Input ID	GO Biological Processes	19	GO:0001933	negative regulation of protein phosphorylation	-14.2751	9.58029	12.8513	23250	411	124	21	16.9355	3.36818	348|1029|1030|2475|3480|3553|5037|5071|5300|5621|5663|6622|6895|7099|7345|10519|10891|11315|23410|23411|51527	APOE|CDKN2A|CDKN2B|MTOR|IGF1R|IL1B|PEBP1|PRKN|PIN1|PRNP|PSEN1|SNCA|TARBP2|TLR4|UCHL1|CIB1|PPARGC1A|PARK7|SIRT3|SIRT1|GSKIP	-11.9228
Input ID	GO Biological Processes	19	GO:0043523	regulation of neuron apoptotic process	-14.2434	15.7068	14.9444	23250	191	124	16	12.9032	3.0105	348|1386|1499|2931|3553|3845|4035|5071|5300|5621|5663|6622|6647|10891|11315|80823	APOE|ATF2|CTNNB1|GSK3A|IL1B|KRAS|LRP1|PRKN|PIN1|PRNP|PSEN1|SNCA|SOD1|PPARGC1A|PARK7|BHLHB9	-11.9051
Input ID	GO Biological Processes	19	GO:0051348	negative regulation of transferase activity	-13.9688	12.0536	13.6259	23250	280	124	18	14.5161	3.16342	348|1029|1030|2931|2932|3480|3553|4137|5071|5468|5663|6895|7157|7345|10519|11315|23411|51527	APOE|CDKN2A|CDKN2B|GSK3A|GSK3B|IGF1R|IL1B|MAPT|PRKN|PPARG|PSEN1|TARBP2|TP53|UCHL1|CIB1|PARK7|SIRT1|GSKIP	-11.6487
Input ID	GO Biological Processes	19	GO:2001233	regulation of apoptotic signaling pathway	-13.6724	9.66495	12.6034	23250	388	124	20	16.129	3.30293	672|1499|2537|2931|2932|3552|3553|3630|4000|5071|5663|5743|6279|6280|6647|7124|7157|11315|23411|57805	BRCA1|CTNNB1|IFI6|GSK3A|GSK3B|IL1A|IL1B|INS|LMNA|PRKN|PSEN1|PTGS2|S100A8|S100A9|SOD1|TNF|TP53|PARK7|SIRT1|CCAR2	-11.3724
Input ID	GO Biological Processes	19	GO:0043410	positive regulation of MAPK cascade	-13.6709	7.75629	11.8074	23250	556	124	23	18.5484	3.49054	151|177|351|1499|1950|1956|2911|3146|3480|3553|3569|3630|3643|3845|4851|5294|5562|5663|6647|7099|7124|9365|10519	ADRA2B|AGER|APP|CTNNB1|EGF|EGFR|GRM1|HMGB1|IGF1R|IL1B|IL6|INS|INSR|KRAS|NOTCH1|PIK3CG|PRKAA1|PSEN1|SOD1|TLR4|TNF|KL|CIB1	-11.3724
Input ID	GO Biological Processes	19	GO:0031347	regulation of defense response	-13.5782	6.44841	11.1522	23250	756	124	26	20.9677	3.65567	177|338|348|351|1956|2099|3146|3553|3569|3630|3845|4313|5294|5465|5468|5566|5654|5743|5802|6279|6280|6622|6895|7099|7124|11315	AGER|APOB|APOE|APP|EGFR|ESR1|HMGB1|IL1B|IL6|INS|KRAS|MMP2|PIK3CG|PPARA|PPARG|PRKACA|HTRA1|PTGS2|PTPRS|S100A8|S100A9|SNCA|TARBP2|TLR4|TNF|PARK7	-11.288
Input ID	GO Biological Processes	19	GO:0006954	inflammatory response	-13.5248	6.41447	11.113	23250	760	124	26	20.9677	3.65567	177|348|351|1234|1956|2099|3146|3552|3553|3569|3630|4035|4137|4851|4968|5294|5465|5468|5663|5743|6279|6280|6622|7099|7124|11315	AGER|APOE|APP|CCR5|EGFR|ESR1|HMGB1|IL1A|IL1B|IL6|INS|LRP1|MAPT|NOTCH1|OGG1|PIK3CG|PPARA|PPARG|PSEN1|PTGS2|S100A8|S100A9|SNCA|TLR4|TNF|PARK7	-11.2429
Input ID	GO Biological Processes	19	GO:1900407	regulation of cellular response to oxidative stress	-13.4724	26.1628	17.1184	23250	86	124	12	9.67742	2.65502	1499|3630|4314|5071|5074|6647|7099|7124|7471|10013|11315|23411	CTNNB1|INS|MMP3|PRKN|PAWR|SOD1|TLR4|TNF|WNT1|HDAC6|PARK7|SIRT1	-11.1944
Input ID	GO Biological Processes	19	GO:1902532	negative regulation of intracellular signal transduction	-13.4106	8.05664	11.8228	23250	512	124	22	17.7419	3.43067	348|1827|2099|2475|2931|2932|3480|3553|3630|5037|5071|5300|5562|5621|5743|7099|7345|10519|11315|23410|23411|57805	APOE|RCAN1|ESR1|MTOR|GSK3A|GSK3B|IGF1R|IL1B|INS|PEBP1|PRKN|PIN1|PRKAA1|PRNP|PTGS2|TLR4|UCHL1|CIB1|PARK7|SIRT3|SIRT1|CCAR2	-11.1367
Input ID	GO Biological Processes	19	GO:0042987	amyloid precursor protein catabolic process	-13.1821	52.7344	21.4439	23250	32	124	9	7.25806	2.3299	274|348|351|1718|2931|5621|5663|5664|54103	BIN1|APOE|APP|DHCR24|GSK3A|PRNP|PSEN1|PSEN2|GSAP	-10.9135
Input ID	GO Biological Processes	19	GO:0010638	positive regulation of organelle organization	-13.1138	7.29695	11.3545	23250	591	124	23	18.5484	3.49054	274|672|1499|1789|1950|2475|2931|2932|3552|3553|3630|3643|4137|5037|5071|5562|7124|7157|8678|10013|10891|11315|23411	BIN1|BRCA1|CTNNB1|DNMT3B|EGF|MTOR|GSK3A|GSK3B|IL1A|IL1B|INS|INSR|MAPT|PEBP1|PRKN|PRKAA1|TNF|TP53|BECN1|HDAC6|PPARGC1A|PARK7|SIRT1	-10.8516
Input ID	GO Biological Processes	19	GO:0021782	glial cell development	-13.1087	24.4565	16.5071	23250	92	124	12	9.67742	2.65502	177|351|1956|3845|4035|4137|5534|5663|6279|6280|6647|28514	AGER|APP|EGFR|KRAS|LRP1|MAPT|PPP3R1|PSEN1|S100A8|S100A9|SOD1|DLL1	-10.8504
Input ID	GO Biological Processes	19	GO:0009611	response to wounding	-13.0881	6.84932	11.1369	23250	657	124	24	19.3548	3.54791	151|177|348|1956|2475|3146|3552|3553|3569|3630|4851|5037|5294|5465|5566|5653|5802|6279|6280|6647|6868|7099|7471|11216	ADRA2B|AGER|APOE|EGFR|MTOR|HMGB1|IL1A|IL1B|IL6|INS|NOTCH1|PEBP1|PIK3CG|PPARA|PRKACA|KLK6|PTPRS|S100A8|S100A9|SOD1|ADAM17|TLR4|WNT1|AKAP10	-10.8386
Input ID	GO Biological Processes	19	GO:0043434	response to peptide hormone	-13.0855	8.99281	12.06	23250	417	124	20	16.129	3.30293	328|682|2475|2931|3416|3480|3553|3630|3643|5465|5468|5562|5566|5743|6654|7351|7352|7471|9365|23411	APEX1|BSG|MTOR|GSK3A|IDE|IGF1R|IL1B|INS|INSR|PPARA|PPARG|PRKAA1|PRKACA|PTGS2|SOS1|UCP2|UCP3|WNT1|KL|SIRT1	-10.8386
Input ID	GO Biological Processes	19	GO:0051051	negative regulation of transport	-13.0439	8.28947	11.7538	23250	475	124	21	16.9355	3.36818	151|274|341|351|1410|1950|2475|2931|3146|3553|3630|4851|5071|5562|5663|5743|6622|7124|7351|9531|11315	ADRA2B|BIN1|APOC1|APP|CRYAB|EGF|MTOR|GSK3A|HMGB1|IL1B|INS|NOTCH1|PRKN|PRKAA1|PSEN1|PTGS2|SNCA|TNF|UCP2|BAG3|PARK7	-10.8007
Input ID	GO Biological Processes	19	GO:0036473	cell death in response to oxidative stress	-12.9366	23.6842	16.2228	23250	95	124	12	9.67742	2.65502	1499|3630|4314|5071|5074|6647|7099|7471|10013|11315|23411|51527	CTNNB1|INS|MMP3|PRKN|PAWR|SOD1|TLR4|WNT1|HDAC6|PARK7|SIRT1|GSKIP	-10.7008
Input ID	GO Biological Processes	19	GO:0097237	cellular response to toxic substance	-12.9198	12.931	13.3737	23250	232	124	16	12.9032	3.0105	328|348|1788|3569|5071|5074|5562|5743|6280|6647|7124|8678|10013|10891|11315|23411	APEX1|APOE|DNMT3A|IL6|PRKN|PAWR|PRKAA1|PTGS2|S100A9|SOD1|TNF|BECN1|HDAC6|PPARGC1A|PARK7|SIRT1	-10.6876
Input ID	GO Biological Processes	19	GO:1902882	regulation of response to oxidative stress	-12.8805	23.4375	16.1309	23250	96	124	12	9.67742	2.65502	1499|3630|4314|5071|5074|6647|7099|7124|7471|10013|11315|23411	CTNNB1|INS|MMP3|PRKN|PAWR|SOD1|TLR4|TNF|WNT1|HDAC6|PARK7|SIRT1	-10.6519
Input ID	GO Biological Processes	19	GO:0031349	positive regulation of defense response	-12.8559	8.74126	11.8505	23250	429	124	20	16.129	3.30293	177|338|351|1956|2099|3146|3553|3569|3845|4313|5294|5566|5743|5802|6279|6280|6622|7099|7124|11315	AGER|APOB|APP|EGFR|ESR1|HMGB1|IL1B|IL6|KRAS|MMP2|PIK3CG|PRKACA|PTGS2|PTPRS|S100A8|S100A9|SNCA|TLR4|TNF|PARK7	-10.6345
Input ID	GO Biological Processes	19	GO:1903201	regulation of oxidative stress-induced cell death	-12.5685	27.1382	16.7126	23250	76	124	11	8.87097	2.55331	1499|3630|4314|5071|5074|6647|7099|7471|10013|11315|23411	CTNNB1|INS|MMP3|PRKN|PAWR|SOD1|TLR4|WNT1|HDAC6|PARK7|SIRT1	-10.381
Input ID	GO Biological Processes	19	GO:0032103	positive regulation of response to external stimulus	-12.5057	10.9161	12.4861	23250	292	124	17	13.7097	3.08876	102|177|351|846|1956|3146|3553|3569|5294|5743|6279|6280|6622|6868|7099|7124|11315	ADAM10|AGER|APP|CASR|EGFR|HMGB1|IL1B|IL6|PIK3CG|PTGS2|S100A8|S100A9|SNCA|ADAM17|TLR4|TNF|PARK7	-10.3215
Input ID	GO Biological Processes	19	GO:0062013	positive regulation of small molecule metabolic process	-12.4672	18.1903	14.6131	23250	134	124	13	10.4839	2.75106	1950|3146|3553|3630|3643|5465|5468|5562|5743|6622|7124|10891|11315	EGF|HMGB1|IL1B|INS|INSR|PPARA|PPARG|PRKAA1|PTGS2|SNCA|TNF|PPARGC1A|PARK7	-10.2926
Input ID	GO Biological Processes	19	GO:0050801	ion homeostasis	-12.4555	6.06404	10.4853	23250	773	124	25	20.1613	3.60292	348|351|488|846|1234|1956|2099|2537|2911|3146|3553|3630|5071|5294|5562|5566|5621|5663|6279|6280|6622|6647|9365|9429|23411	APOE|APP|ATP2A2|CASR|CCR5|EGFR|ESR1|IFI6|GRM1|HMGB1|IL1B|INS|PRKN|PIK3CG|PRKAA1|PRKACA|PRNP|PSEN1|S100A8|S100A9|SNCA|SOD1|KL|ABCG2|SIRT1	-10.284
Input ID	GO Biological Processes	19	GO:0071902	positive regulation of protein serine/threonine kinase activity	-12.4351	9.81105	12.0558	23250	344	124	18	14.5161	3.16342	151|177|1950|1956|2911|3553|3643|3845|5294|5562|5663|6622|6647|6868|7099|7124|10519|23411	ADRA2B|AGER|EGF|EGFR|GRM1|IL1B|INSR|KRAS|PIK3CG|PRKAA1|PSEN1|SNCA|SOD1|ADAM17|TLR4|TNF|CIB1|SIRT1	-10.2668
Input ID	GO Biological Processes	19	GO:0043254	regulation of protein complex assembly	-12.4177	8.27815	11.455	23250	453	124	20	16.129	3.30293	274|348|1410|1499|2099|2475|2932|3146|3320|3416|3630|4137|4314|6622|7099|7124|7157|10013|10273|11315	BIN1|APOE|CRYAB|CTNNB1|ESR1|MTOR|GSK3B|HMGB1|HSP90AA1|IDE|INS|MAPT|MMP3|SNCA|TLR4|TNF|TP53|HDAC6|STUB1|PARK7	-10.2525
Input ID	GO Biological Processes	19	GO:0050729	positive regulation of inflammatory response	-12.3835	17.9228	14.4933	23250	136	124	13	10.4839	2.75106	177|351|1956|3553|3569|5294|5743|6279|6280|6622|7099|7124|11315	AGER|APP|EGFR|IL1B|IL6|PIK3CG|PTGS2|S100A8|S100A9|SNCA|TLR4|TNF|PARK7	-10.2233
Input ID	Reactome Gene Sets	6	R-HSA-9006934	Signaling by Receptor Tyrosine Kinases	-12.3824	8.24176	11.4233	23250	455	124	20	16.129	3.30293	102|1499|1950|1956|2099|2475|3320|3480|3630|3643|3845|5566|5663|5664|5802|6654|6868|8038|9365|10273	ADAM10|CTNNB1|EGF|EGFR|ESR1|MTOR|HSP90AA1|IGF1R|INS|INSR|KRAS|PRKACA|PSEN1|PSEN2|PTPRS|SOS1|ADAM17|ADAM12|KL|STUB1	-10.2233
Input ID	GO Biological Processes	19	GO:0045596	negative regulation of cell differentiation	-12.3761	6.34697	10.5878	23250	709	124	24	19.3548	3.54791	348|351|1499|1956|2931|2932|3146|3313|3553|3569|3845|4035|4077|4851|5465|5468|5663|5802|7099|7124|7471|10519|23411|28514	APOE|APP|CTNNB1|EGFR|GSK3A|GSK3B|HMGB1|HSPA9|IL1B|IL6|KRAS|LRP1|NBR1|NOTCH1|PPARA|PPARG|PSEN1|PTPRS|TLR4|TNF|WNT1|CIB1|SIRT1|DLL1	-10.2201
Input ID	GO Biological Processes	19	GO:0045862	positive regulation of proteolysis	-12.3501	9.69828	11.9715	23250	348	124	18	14.5161	3.16342	348|351|1950|2931|2932|3146|3553|4137|4898|5071|5468|5663|6279|6280|6622|7124|10273|23411	APOE|APP|EGF|GSK3A|GSK3B|HMGB1|IL1B|MAPT|NRDC|PRKN|PPARG|PSEN1|S100A8|S100A9|SNCA|TNF|STUB1|SIRT1	-10.197
Input ID	GO Biological Processes	19	GO:0022411	cellular component disassembly	-12.3336	7.61605	11.1398	23250	517	124	21	16.9355	3.36818	102|682|1499|2931|2932|3146|3480|3643|4035|4313|4314|5071|5654|7124|7471|8678|8878|10013|10519|10891|11315	ADAM10|BSG|CTNNB1|GSK3A|GSK3B|HMGB1|IGF1R|INSR|LRP1|MMP2|MMP3|PRKN|HTRA1|TNF|WNT1|BECN1|SQSTM1|HDAC6|CIB1|PPARGC1A|PARK7	-10.1836
Input ID	GO Biological Processes	19	GO:1901216	positive regulation of neuron death	-12.2525	25.463	16.1496	23250	81	124	11	8.87097	2.55331	1386|1499|2475|2931|2932|3553|4137|5300|5621|6622|7099	ATF2|CTNNB1|MTOR|GSK3A|GSK3B|IL1B|MAPT|PIN1|PRNP|SNCA|TLR4	-10.1084
Input ID	GO Biological Processes	19	GO:0070848	response to growth factor	-12.2075	6.23269	10.4591	23250	722	124	24	19.3548	3.54791	351|846|1030|1499|1956|3553|3643|4137|4851|5300|5654|6622|6654|6868|7471|8678|9365|9638|10013|10273|10519|10891|23411|28514	APP|CASR|CDKN2B|CTNNB1|EGFR|IL1B|INSR|MAPT|NOTCH1|PIN1|HTRA1|SNCA|SOS1|ADAM17|WNT1|BECN1|KL|FEZ1|HDAC6|STUB1|CIB1|PPARGC1A|SIRT1|DLL1	-10.0664
Input ID	GO Biological Processes	19	GO:0031667	response to nutrient levels	-12.106	7.96178	11.177	23250	471	124	20	16.129	3.30293	348|846|1030|1788|1789|1956|2475|3553|4968|5465|5468|5562|5743|6647|7157|7351|7352|8678|10891|23411	APOE|CASR|CDKN2B|DNMT3A|DNMT3B|EGFR|MTOR|IL1B|OGG1|PPARA|PPARG|PRKAA1|PTGS2|SOD1|TP53|UCP2|UCP3|BECN1|PPARGC1A|SIRT1	-9.97644
Input ID	GO Biological Processes	19	GO:0048514	blood vessel morphogenesis	-11.9843	6.43657	10.4559	23250	670	124	23	18.5484	3.49054	338|348|672|1386|1499|1950|3146|3552|3553|3569|4035|4313|4851|5294|5468|5534|5743|6654|7490|8038|10519|23411|28514	APOB|APOE|BRCA1|ATF2|CTNNB1|EGF|HMGB1|IL1A|IL1B|IL6|LRP1|MMP2|NOTCH1|PIK3CG|PPARG|PPP3R1|PTGS2|SOS1|WT1|ADAM12|CIB1|SIRT1|DLL1	-9.86586
Input ID	GO Biological Processes	19	GO:0014074	response to purine-containing compound	-11.9841	16.6952	13.9304	23250	146	124	13	10.4839	2.75106	328|351|682|1789|3553|5037|5294|5468|5562|5743|6647|7490|10891	APEX1|APP|BSG|DNMT3B|IL1B|PEBP1|PIK3CG|PPARG|PRKAA1|PTGS2|SOD1|WT1|PPARGC1A	-9.86586
Input ID	KEGG Pathway	24	hsa04213	Longevity regulating pathway - multiple species	-11.9604	30.2419	16.8824	23250	62	124	10	8.06452	2.44523	1410|2475|3480|3630|3643|3845|5562|5566|6647|23411	CRYAB|MTOR|IGF1R|INS|INSR|KRAS|PRKAA1|PRKACA|SOD1|SIRT1	-9.85038
Input ID	GO Biological Processes	19	GO:0019216	regulation of lipid metabolic process	-11.9604	9.19619	11.5891	23250	367	124	18	14.5161	3.16342	338|341|348|672|2475|3553|3630|5294|5465|5468|5562|5743|6622|6647|7124|10273|10891|23411	APOB|APOC1|APOE|BRCA1|MTOR|IL1B|INS|PIK3CG|PPARA|PPARG|PRKAA1|PTGS2|SNCA|SOD1|TNF|STUB1|PPARGC1A|SIRT1	-9.85038
Input ID	GO Biological Processes	19	GO:0040017	positive regulation of locomotion	-11.9567	7.27819	10.8192	23250	541	124	21	16.9355	3.36818	102|177|351|846|1950|1956|2475|3146|3480|3552|3553|3569|3630|3643|4851|5743|6868|7124|10013|10519|23411	ADAM10|AGER|APP|CASR|EGF|EGFR|MTOR|HMGB1|IGF1R|IL1A|IL1B|IL6|INS|INSR|NOTCH1|PTGS2|ADAM17|TNF|HDAC6|CIB1|SIRT1	-9.84941
Input ID	GO Biological Processes	19	GO:0006109	regulation of carbohydrate metabolic process	-11.9078	16.4696	13.8244	23250	148	124	13	10.4839	2.75106	1950|2475|2931|2932|3146|3630|3643|5071|5465|5562|6622|10891|23411	EGF|MTOR|GSK3A|GSK3B|HMGB1|INS|INSR|PRKN|PPARA|PRKAA1|SNCA|PPARGC1A|SIRT1	-9.80894
Input ID	KEGG Pathway	24	hsa05215	Prostate cancer	-11.9005	23.7069	15.5376	23250	87	124	11	8.87097	2.55331	1499|1950|1956|2475|2932|3320|3480|3630|3845|6654|7157	CTNNB1|EGF|EGFR|MTOR|GSK3B|HSP90AA1|IGF1R|INS|KRAS|SOS1|TP53	-9.80666
Input ID	GO Biological Processes	19	GO:0008285	negative regulation of cell proliferation	-11.8931	6.0241	10.2202	23250	747	124	24	19.3548	3.54791	348|351|1029|1030|1386|1499|1718|3552|3553|3569|3621|4000|4851|5074|5468|5621|5743|7124|7157|7490|8678|10519|10891|28514	APOE|APP|CDKN2A|CDKN2B|ATF2|CTNNB1|DHCR24|IL1A|IL1B|IL6|ING1|LMNA|NOTCH1|PAWR|PPARG|PRNP|PTGS2|TNF|TP53|WT1|BECN1|CIB1|PPARGC1A|DLL1	-9.80187
Input ID	GO Biological Processes	19	GO:0032147	activation of protein kinase activity	-11.843	9.92991	11.7969	23250	321	124	17	13.7097	3.08876	151|1950|1956|2475|2911|3146|3553|3630|3643|5562|5566|5621|5663|6647|7099|7124|11315	ADRA2B|EGF|EGFR|MTOR|GRM1|HMGB1|IL1B|INS|INSR|PRKAA1|PRKACA|PRNP|PSEN1|SOD1|TLR4|TNF|PARK7	-9.75696
Input ID	GO Biological Processes	19	GO:0001568	blood vessel development	-11.7829	5.95238	10.1369	23250	756	124	24	19.3548	3.54791	338|348|672|1386|1499|1950|3146|3552|3553|3569|4035|4313|4851|5294|5468|5534|5663|5743|6654|7490|8038|10519|23411|28514	APOB|APOE|BRCA1|ATF2|CTNNB1|EGF|HMGB1|IL1A|IL1B|IL6|LRP1|MMP2|NOTCH1|PIK3CG|PPARG|PPP3R1|PSEN1|PTGS2|SOS1|WT1|ADAM12|CIB1|SIRT1|DLL1	-9.70203
Input ID	GO Biological Processes	19	GO:0050767	regulation of neurogenesis	-11.7587	5.93668	10.1185	23250	758	124	24	19.3548	3.54791	151|177|274|348|351|1499|1789|2475|2931|2932|3553|4035|4137|4851|5071|5468|5653|5663|5802|6280|9638|10519|28514|80823	ADRA2B|AGER|BIN1|APOE|APP|CTNNB1|DNMT3B|MTOR|GSK3A|GSK3B|IL1B|LRP1|MAPT|NOTCH1|PRKN|PPARG|KLK6|PSEN1|PTPRS|S100A9|FEZ1|CIB1|DLL1|BHLHB9	-9.6803
Input ID	GO Biological Processes	19	GO:0006509	membrane protein ectodomain proteolysis	-11.7077	37.5	17.9461	23250	45	124	9	7.25806	2.3299	102|348|3553|4898|5663|5664|6868|7124|25825	ADAM10|APOE|IL1B|NRDC|PSEN1|PSEN2|ADAM17|TNF|BACE2	-9.63182
Input ID	GO Biological Processes	19	GO:1904646	cellular response to amyloid-beta	-11.6915	51.7241	20.0141	23250	29	124	8	6.45161	2.20618	177|351|2932|3480|4035|5621|5663|7099	AGER|APP|GSK3B|IGF1R|LRP1|PRNP|PSEN1|TLR4	-9.61814
Input ID	GO Biological Processes	19	GO:0071363	cellular response to growth factor stimulus	-11.6843	6.22294	10.2213	23250	693	124	23	18.5484	3.49054	351|846|1030|1499|1956|3553|3643|4137|4851|5300|5654|6622|6654|6868|7471|8678|9365|9638|10273|10519|10891|23411|28514	APP|CASR|CDKN2B|CTNNB1|EGFR|IL1B|INSR|MAPT|NOTCH1|PIN1|HTRA1|SNCA|SOS1|ADAM17|WNT1|BECN1|KL|FEZ1|STUB1|CIB1|PPARGC1A|SIRT1|DLL1	-9.61344
Input ID	GO Biological Processes	19	GO:0046677	response to antibiotic	-11.6299	9.62991	11.5794	23250	331	124	17	13.7097	3.08876	328|1410|1788|3320|3553|3569|4968|5037|5074|5562|6279|6647|7157|8678|10013|11315|23411	APEX1|CRYAB|DNMT3A|HSP90AA1|IL1B|IL6|OGG1|PEBP1|PAWR|PRKAA1|S100A8|SOD1|TP53|BECN1|HDAC6|PARK7|SIRT1	-9.56401
Input ID	GO Biological Processes	19	GO:0009991	response to extracellular stimulus	-11.6153	7.48503	10.7451	23250	501	124	20	16.129	3.30293	348|846|1030|1788|1789|1956|2475|3553|4968|5465|5468|5562|5743|6647|7157|7351|7352|8678|10891|23411	APOE|CASR|CDKN2B|DNMT3A|DNMT3B|EGFR|MTOR|IL1B|OGG1|PPARA|PPARG|PRKAA1|PTGS2|SOD1|TP53|UCP2|UCP3|BECN1|PPARGC1A|SIRT1	-9.55436
Input ID	Canonical Pathways	11	M87	PID LKB1 PATHWAY	-11.5247	35.9043	17.5395	23250	47	124	9	7.25806	2.3299	2099|2475|2932|3320|4137|5562|5566|5664|7157	ESR1|MTOR|GSK3B|HSP90AA1|MAPT|PRKAA1|PRKACA|PSEN2|TP53	-9.47098
Input ID	GO Biological Processes	19	GO:0051341	regulation of oxidoreductase activity	-11.5223	21.9415	14.8971	23250	94	124	11	8.87097	2.55331	348|1956|3320|3553|3630|3845|5071|6622|7124|10013|11315	APOE|EGFR|HSP90AA1|IL1B|INS|KRAS|PRKN|SNCA|TNF|HDAC6|PARK7	-9.47096
Input ID	GO Biological Processes	19	GO:1900409	positive regulation of cellular response to oxidative stress	-11.5038	72.9167	22.3504	23250	18	124	7	5.64516	2.07257	4314|5074|6647|7099|7124|10013|11315	MMP3|PAWR|SOD1|TLR4|TNF|HDAC6|PARK7	-9.45489
Input ID	GO Biological Processes	19	GO:0019932	second-messenger-mediated signaling	-11.4439	8.56599	11.0911	23250	394	124	18	14.5161	3.16342	151|348|488|1234|1827|1956|2475|2931|2932|3630|4137|5037|5534|5562|5566|5621|7124|10519	ADRA2B|APOE|ATP2A2|CCR5|RCAN1|EGFR|MTOR|GSK3A|GSK3B|INS|MAPT|PEBP1|PPP3R1|PRKAA1|PRKACA|PRNP|TNF|CIB1	-9.40038
Input ID	KEGG Pathway	24	hsa05200	Pathways in cancer	-11.4256	8.5443	11.0736	23250	395	124	18	14.5161	3.16342	1029|1030|1499|1950|1956|2475|2932|3320|3480|3569|3845|4313|5468|5566|5743|6654|7157|7471	CDKN2A|CDKN2B|CTNNB1|EGF|EGFR|MTOR|GSK3B|HSP90AA1|IGF1R|IL6|KRAS|MMP2|PPARG|PRKACA|PTGS2|SOS1|TP53|WNT1	-9.38604
Input ID	KEGG Pathway	24	hsa04151	PI3K-Akt signaling pathway	-11.4036	9.32018	11.3505	23250	342	124	17	13.7097	3.08876	672|1386|1950|1956|2475|2932|3320|3480|3569|3630|3643|3845|5294|5562|6654|7099|7157	BRCA1|ATF2|EGF|EGFR|MTOR|GSK3B|HSP90AA1|IGF1R|IL6|INS|INSR|KRAS|PIK3CG|PRKAA1|SOS1|TLR4|TP53	-9.36635
Input ID	GO Biological Processes	19	GO:0001944	vasculature development	-11.3802	5.6962	9.83373	23250	790	124	24	19.3548	3.54791	338|348|672|1386|1499|1950|3146|3552|3553|3569|4035|4313|4851|5294|5468|5534|5663|5743|6654|7490|8038|10519|23411|28514	APOB|APOE|BRCA1|ATF2|CTNNB1|EGF|HMGB1|IL1A|IL1B|IL6|LRP1|MMP2|NOTCH1|PIK3CG|PPARG|PPP3R1|PSEN1|PTGS2|SOS1|WT1|ADAM12|CIB1|SIRT1|DLL1	-9.34529
Input ID	GO Biological Processes	19	GO:0034614	cellular response to reactive oxygen species	-11.3696	14.954	13.0909	23250	163	124	13	10.4839	2.75106	328|1956|3569|4137|4314|5074|5562|6647|7124|8678|10013|11315|23411	APEX1|EGFR|IL6|MAPT|MMP3|PAWR|PRKAA1|SOD1|TNF|BECN1|HDAC6|PARK7|SIRT1	-9.33695
Input ID	KEGG Pathway	24	hsa05205	Proteoglycans in cancer	-11.35	12.931	12.5021	23250	203	124	14	11.2903	2.84202	1499|1956|2099|2475|3316|3480|3845|4313|5566|6654|7099|7124|7157|7471	CTNNB1|EGFR|ESR1|MTOR|HSPB2|IGF1R|KRAS|MMP2|PRKACA|SOS1|TLR4|TNF|TP53|WNT1	-9.3197
Input ID	GO Biological Processes	19	GO:0043405	regulation of MAP kinase activity	-11.3233	9.21243	11.2698	23250	346	124	17	13.7097	3.08876	151|177|348|1950|1956|2911|3480|3553|3643|3845|5294|5562|5663|6647|7099|7124|7345	ADRA2B|AGER|APOE|EGF|EGFR|GRM1|IGF1R|IL1B|INSR|KRAS|PIK3CG|PRKAA1|PSEN1|SOD1|TLR4|TNF|UCHL1	-9.29522
Input ID	GO Biological Processes	19	GO:1904645	response to amyloid-beta	-11.308	46.875	19.0152	23250	32	124	8	6.45161	2.20618	177|351|2932|3480|4035|5621|5663|7099	AGER|APP|GSK3B|IGF1R|LRP1|PRNP|PSEN1|TLR4	-9.28571
Input ID	GO Biological Processes	19	GO:0007005	mitochondrion organization	-11.2914	7.18391	10.4636	23250	522	124	20	16.129	3.30293	1386|2537|2931|2932|3320|4000|4137|5071|5562|6622|7157|8678|8878|9531|9638|10013|10891|11315|23410|57805	ATF2|IFI6|GSK3A|GSK3B|HSP90AA1|LMNA|MAPT|PRKN|PRKAA1|SNCA|TP53|BECN1|SQSTM1|BAG3|FEZ1|HDAC6|PPARGC1A|PARK7|SIRT3|CCAR2	-9.27611
Input ID	GO Biological Processes	19	GO:0072358	cardiovascular system development	-11.277	5.63204	9.75642	23250	799	124	24	19.3548	3.54791	338|348|672|1386|1499|1950|3146|3552|3553|3569|4035|4313|4851|5294|5468|5534|5663|5743|6654|7490|8038|10519|23411|28514	APOB|APOE|BRCA1|ATF2|CTNNB1|EGF|HMGB1|IL1A|IL1B|IL6|LRP1|MMP2|NOTCH1|PIK3CG|PPARG|PPP3R1|PSEN1|PTGS2|SOS1|WT1|ADAM12|CIB1|SIRT1|DLL1	-9.26448
Input ID	Reactome Gene Sets	6	R-HSA-449147	Signaling by Interleukins	-11.2681	7.71104	10.6689	23250	462	124	19	15.3226	3.23474	177|351|1234|1386|3146|3313|3320|3552|3553|3569|4313|4314|5566|5743|6647|6654|7124|7157|8878	AGER|APP|CCR5|ATF2|HMGB1|HSPA9|HSP90AA1|IL1A|IL1B|IL6|MMP2|MMP3|PRKACA|PTGS2|SOD1|SOS1|TNF|TP53|SQSTM1	-9.25776
Input ID	GO Biological Processes	19	GO:0051272	positive regulation of cellular component movement	-11.2464	7.14286	10.4246	23250	525	124	20	16.129	3.30293	102|351|1950|1956|2475|3146|3480|3552|3553|3569|3630|3643|4851|5743|6868|7124|9638|10013|10519|23411	ADAM10|APP|EGF|EGFR|MTOR|HMGB1|IGF1R|IL1A|IL1B|IL6|INS|INSR|NOTCH1|PTGS2|ADAM17|TNF|FEZ1|HDAC6|CIB1|SIRT1	-9.23819
Input ID	GO Biological Processes	19	GO:0007346	regulation of mitotic cell cycle	-11.2279	6.25948	10.0295	23250	659	124	22	17.7419	3.43067	328|351|672|1029|1030|1386|1499|1950|1956|3320|3552|3553|3630|3643|5037|5300|5566|6868|7124|7157|8678|23411	APEX1|APP|BRCA1|CDKN2A|CDKN2B|ATF2|CTNNB1|EGF|EGFR|HSP90AA1|IL1A|IL1B|INS|INSR|PEBP1|PIN1|PRKACA|ADAM17|TNF|TP53|BECN1|SIRT1	-9.22405
Input ID	GO Biological Processes	19	GO:0043467	regulation of generation of precursor metabolites and energy	-11.2219	20.625	14.4011	23250	100	124	11	8.87097	2.55331	2475|2931|2932|3146|3630|3643|5465|5562|6622|10891|11315	MTOR|GSK3A|GSK3B|HMGB1|INS|INSR|PPARA|PRKAA1|SNCA|PPARGC1A|PARK7	-9.22013
Input ID	GO Biological Processes	19	GO:0050804	modulation of chemical synaptic transmission	-11.2048	9.0554	11.1512	23250	352	124	17	13.7097	3.08876	177|348|351|488|1956|2911|3553|3630|3845|4137|5071|5566|5621|5663|5743|6622|8878	AGER|APOE|APP|ATP2A2|EGFR|GRM1|IL1B|INS|KRAS|MAPT|PRKN|PRKACA|PRNP|PSEN1|PTGS2|SNCA|SQSTM1	-9.20987
Input ID	KEGG Pathway	24	hsa04068	FoxO signaling pathway	-11.2032	17.0455	13.5371	23250	132	124	12	9.67742	2.65502	1030|1950|1956|2911|3480|3569|3630|3643|3845|5562|6654|23411	CDKN2B|EGF|EGFR|GRM1|IGF1R|IL6|INS|INSR|KRAS|PRKAA1|SOS1|SIRT1	-9.20987
Input ID	GO Biological Processes	19	GO:0099177	regulation of trans-synaptic signaling	-11.1853	9.02975	11.1317	23250	353	124	17	13.7097	3.08876	177|348|351|488|1956|2911|3553|3630|3845|4137|5071|5566|5621|5663|5743|6622|8878	AGER|APOE|APP|ATP2A2|EGFR|GRM1|IL1B|INS|KRAS|MAPT|PRKN|PRKACA|PRNP|PSEN1|PTGS2|SNCA|SQSTM1	-9.19406
Input ID	GO Biological Processes	19	GO:1902884	positive regulation of response to oxidative stress	-11.121	65.625	21.1716	23250	20	124	7	5.64516	2.07257	4314|5074|6647|7099|7124|10013|11315	MMP3|PAWR|SOD1|TLR4|TNF|HDAC6|PARK7	-9.1339
Input ID	GO Biological Processes	19	GO:0050727	regulation of inflammatory response	-11.0518	8.11298	10.7194	23250	416	124	18	14.5161	3.16342	177|348|351|1956|2099|3553|3569|3630|5294|5465|5468|5743|6279|6280|6622|7099|7124|11315	AGER|APOE|APP|EGFR|ESR1|IL1B|IL6|INS|PIK3CG|PPARA|PPARG|PTGS2|S100A8|S100A9|SNCA|TLR4|TNF|PARK7	-9.06984
Input ID	GO Biological Processes	19	GO:0046890	regulation of lipid biosynthetic process	-11.0401	14.0896	12.6538	23250	173	124	13	10.4839	2.75106	338|341|348|672|2475|3553|3630|5562|5743|6647|7124|10891|23411	APOB|APOC1|APOE|BRCA1|MTOR|IL1B|INS|PRKAA1|PTGS2|SOD1|TNF|PPARGC1A|SIRT1	-9.0632
Input ID	GO Biological Processes	19	GO:0032868	response to insulin	-11.017	10.8173	11.6566	23250	260	124	15	12.0968	2.92837	2475|2931|3416|3480|3553|3630|3643|5465|5468|5562|6654|7351|7352|9365|23411	MTOR|GSK3A|IDE|IGF1R|IL1B|INS|INSR|PPARA|PPARG|PRKAA1|SOS1|UCP2|UCP3|KL|SIRT1	-9.04404
Input ID	GO Biological Processes	19	GO:0042060	wound healing	-10.9678	6.89338	10.1849	23250	544	124	20	16.129	3.30293	151|177|348|1956|2475|3146|3552|3553|3569|3630|4851|5294|5465|5566|5653|6279|6280|6868|7099|11216	ADRA2B|AGER|APOE|EGFR|MTOR|HMGB1|IL1A|IL1B|IL6|INS|NOTCH1|PIK3CG|PPARA|PRKACA|KLK6|S100A8|S100A9|ADAM17|TLR4|AKAP10	-8.99683
Input ID	GO Biological Processes	19	GO:0032386	regulation of intracellular transport	-10.937	8.70902	10.8852	23250	366	124	17	13.7097	3.08876	488|1410|2931|2932|3553|5071|5562|5566|5621|5663|5743|7157|9531|9638|10519|11315|23411	ATP2A2|CRYAB|GSK3A|GSK3B|IL1B|PRKN|PRKAA1|PRKACA|PRNP|PSEN1|PTGS2|TP53|BAG3|FEZ1|CIB1|PARK7|SIRT1	-8.96803
Input ID	GO Biological Processes	19	GO:2001234	negative regulation of apoptotic signaling pathway	-10.9048	11.9863	11.9613	23250	219	124	14	11.2903	2.84202	672|1499|2537|3552|3553|3630|4000|5071|5663|5743|7124|11315|23411|57805	BRCA1|CTNNB1|IFI6|IL1A|IL1B|INS|LMNA|PRKN|PSEN1|PTGS2|TNF|PARK7|SIRT1|CCAR2	-8.93781
Input ID	GO Biological Processes	19	GO:0045927	positive regulation of growth	-10.8991	10.6132	11.5248	23250	265	124	15	12.0968	2.92837	102|1956|2475|3630|3643|4137|4851|5071|5300|6279|6280|6868|7490|10519|28514	ADAM10|EGFR|MTOR|INS|INSR|MAPT|NOTCH1|PRKN|PIN1|S100A8|S100A9|ADAM17|WT1|CIB1|DLL1	-8.93404
Input ID	GO Biological Processes	19	GO:1903409	reactive oxygen species biosynthetic process	-10.8955	19.2757	13.8745	23250	107	124	11	8.87097	2.55331	2475|3320|3553|3630|3643|5743|6622|6647|7099|7124|11315	MTOR|HSP90AA1|IL1B|INS|INSR|PTGS2|SNCA|SOD1|TLR4|TNF|PARK7	-8.9324
Input ID	GO Biological Processes	19	GO:0072507	divalent inorganic cation homeostasis	-10.8875	7.33025	10.3271	23250	486	124	19	15.3226	3.23474	348|351|488|846|1234|1956|2099|2911|3146|3553|5071|5294|5566|5621|5663|6279|6280|6622|9365	APOE|APP|ATP2A2|CASR|CCR5|EGFR|ESR1|GRM1|HMGB1|IL1B|PRKN|PIK3CG|PRKACA|PRNP|PSEN1|S100A8|S100A9|SNCA|KL	-8.92639
Input ID	GO Biological Processes	19	GO:0045664	regulation of neuron differentiation	-10.879	6.38169	9.92093	23250	617	124	21	16.9355	3.36818	151|274|348|351|1789|2475|2931|2932|3553|4035|4137|4851|5071|5653|5663|5802|6280|9638|10519|28514|80823	ADRA2B|BIN1|APOE|APP|DNMT3B|MTOR|GSK3A|GSK3B|IL1B|LRP1|MAPT|NOTCH1|PRKN|KLK6|PSEN1|PTPRS|S100A9|FEZ1|CIB1|DLL1|BHLHB9	-8.92082
Input ID	Reactome Gene Sets	6	R-HSA-1280215	Cytokine Signaling in Immune system	-10.8763	6.00437	9.74971	23250	687	124	22	17.7419	3.43067	177|351|1234|1386|2537|3146|3313|3320|3552|3553|3569|4313|4314|5300|5566|5743|6647|6654|6868|7124|7157|8878	AGER|APP|CCR5|ATF2|IFI6|HMGB1|HSPA9|HSP90AA1|IL1A|IL1B|IL6|MMP2|MMP3|PIN1|PRKACA|PTGS2|SOD1|SOS1|ADAM17|TNF|TP53|SQSTM1	-8.92082
Input ID	GO Biological Processes	19	GO:2000378	negative regulation of reactive oxygen species metabolic process	-10.8712	30.6818	16.1375	23250	55	124	9	7.25806	2.3299	672|1410|3630|4314|5071|8678|10013|11315|23410	BRCA1|CRYAB|INS|MMP3|PRKN|BECN1|HDAC6|PARK7|SIRT3	-8.91968
Input ID	GO Biological Processes	19	GO:0106027	neuron projection organization	-10.8663	23.7342	14.8212	23250	79	124	10	8.06452	2.44523	348|351|2932|3480|3630|3643|5621|5663|10013|80823	APOE|APP|GSK3B|IGF1R|INS|INSR|PRNP|PSEN1|HDAC6|BHLHB9	-8.91669
Input ID	GO Biological Processes	19	GO:1905952	regulation of lipid localization	-10.8622	15.9574	13.0449	23250	141	124	12	9.67742	2.65502	338|341|348|1950|3553|3569|4035|5071|5465|5468|7124|23411	APOB|APOC1|APOE|EGF|IL1B|IL6|LRP1|PRKN|PPARA|PPARG|TNF|SIRT1	-8.91444
Input ID	GO Biological Processes	19	GO:0030335	positive regulation of cell migration	-10.7957	7.24085	10.2452	23250	492	124	19	15.3226	3.23474	102|351|1950|1956|2475|3146|3480|3552|3553|3569|3630|3643|4851|5743|6868|7124|10013|10519|23411	ADAM10|APP|EGF|EGFR|MTOR|HMGB1|IGF1R|IL1A|IL1B|IL6|INS|INSR|NOTCH1|PTGS2|ADAM17|TNF|HDAC6|CIB1|SIRT1	-8.85726
Input ID	GO Biological Processes	19	GO:0055082	cellular chemical homeostasis	-10.7699	5.60793	9.51534	23250	769	124	23	18.5484	3.49054	177|348|351|488|846|1234|2099|2911|3146|3553|5294|5562|5566|5621|5663|6279|6280|6622|6647|7351|9429|10891|23411	AGER|APOE|APP|ATP2A2|CASR|CCR5|ESR1|GRM1|HMGB1|IL1B|PIK3CG|PRKAA1|PRKACA|PRNP|PSEN1|S100A8|S100A9|SNCA|SOD1|UCP2|ABCG2|PPARGC1A|SIRT1	-8.83332
Input ID	GO Biological Processes	19	GO:0019217	regulation of fatty acid metabolic process	-10.755	23.1481	14.6214	23250	81	124	10	8.06452	2.44523	341|672|2475|3630|5465|5468|5743|6622|10891|23411	APOC1|BRCA1|MTOR|INS|PPARA|PPARG|PTGS2|SNCA|PPARGC1A|SIRT1	-8.82202
Input ID	GO Biological Processes	19	GO:0032602	chemokine production	-10.755	23.1481	14.6214	23250	81	124	10	8.06452	2.44523	177|3146|3552|3553|3569|6279|6280|6868|7099|7124	AGER|HMGB1|IL1A|IL1B|IL6|S100A8|S100A9|ADAM17|TLR4|TNF	-8.82202
Input ID	GO Biological Processes	19	GO:0048143	astrocyte activation	-10.7367	93.75	23.5325	23250	12	124	6	4.83871	1.92701	177|351|1956|4035|4137|5663	AGER|APP|EGFR|LRP1|MAPT|PSEN1	-8.80831
Input ID	GO Biological Processes	19	GO:0048589	developmental growth	-10.7359	6.2699	9.80347	23250	628	124	21	16.9355	3.36818	348|351|1499|2099|2475|2931|2932|3320|3643|4137|4851|5071|5300|5653|5802|6647|6654|6895|7490|10013|28514	APOE|APP|CTNNB1|ESR1|MTOR|GSK3A|GSK3B|HSP90AA1|INSR|MAPT|NOTCH1|PRKN|PIN1|KLK6|PTPRS|SOD1|SOS1|TARBP2|WT1|HDAC6|DLL1	-8.80831
Input ID	GO Biological Processes	19	GO:0055065	metal ion homeostasis	-10.7359	6.2699	9.80347	23250	628	124	21	16.9355	3.36818	348|351|488|846|1234|1956|2099|2911|3146|3553|5071|5294|5566|5621|5663|6279|6280|6622|6647|9365|9429	APOE|APP|ATP2A2|CASR|CCR5|EGFR|ESR1|GRM1|HMGB1|IL1B|PRKN|PIK3CG|PRKACA|PRNP|PSEN1|S100A8|S100A9|SNCA|SOD1|KL|ABCG2	-8.80831
Input ID	GO Biological Processes	19	GO:0044057	regulation of system process	-10.714	6.6726	9.96815	23250	562	124	20	16.129	3.30293	151|274|351|488|846|1956|2475|2911|2931|3553|4000|4851|5037|5294|5300|5566|5743|6647|8678|10891	ADRA2B|BIN1|APP|ATP2A2|CASR|EGFR|MTOR|GRM1|GSK3A|IL1B|LMNA|NOTCH1|PEBP1|PIK3CG|PIN1|PRKACA|PTGS2|SOD1|BECN1|PPARGC1A	-8.79178
Input ID	GO Biological Processes	19	GO:0071453	cellular response to oxygen levels	-10.7011	13.2473	12.2131	23250	184	124	13	10.4839	2.75106	846|1788|1789|2475|4000|4851|5468|5562|5743|7157|10273|10891|23411	CASR|DNMT3A|DNMT3B|MTOR|LMNA|NOTCH1|PPARG|PRKAA1|PTGS2|TP53|STUB1|PPARGC1A|SIRT1	-8.78066
Input ID	GO Biological Processes	19	GO:0033157	regulation of intracellular protein transport	-10.6699	11.5132	11.6813	23250	228	124	14	11.2903	2.84202	2931|2932|3553|5071|5562|5566|5621|5663|5743|7157|9531|10519|11315|23411	GSK3A|GSK3B|IL1B|PRKN|PRKAA1|PRKACA|PRNP|PSEN1|PTGS2|TP53|BAG3|CIB1|PARK7|SIRT1	-8.75818
Input ID	GO Biological Processes	19	GO:0032768	regulation of monooxygenase activity	-10.6531	29.0948	15.6868	23250	58	124	9	7.25806	2.3299	348|1956|3320|3553|3630|3845|6622|7124|11315	APOE|EGFR|HSP90AA1|IL1B|INS|KRAS|SNCA|TNF|PARK7	-8.7431
Input ID	GO Biological Processes	19	GO:0007169	transmembrane receptor protein tyrosine kinase signaling pathway	-10.6471	5.84278	9.5685	23250	706	124	22	17.7419	3.43067	351|1499|1950|1956|2931|3320|3416|3480|3553|3630|3643|4035|4313|5663|6622|6654|6868|7471|9365|10273|23411|28514	APP|CTNNB1|EGF|EGFR|GSK3A|HSP90AA1|IDE|IGF1R|IL1B|INS|INSR|LRP1|MMP2|PSEN1|SNCA|SOS1|ADAM17|WNT1|KL|STUB1|SIRT1|DLL1	-8.74011
Input ID	GO Biological Processes	19	GO:0045833	negative regulation of lipid metabolic process	-10.6466	22.5904	14.4287	23250	83	124	10	8.06452	2.44523	341|348|672|3553|3630|5294|5562|6647|7124|23411	APOC1|APOE|BRCA1|IL1B|INS|PIK3CG|PRKAA1|SOD1|TNF|SIRT1	-8.74011
Input ID	GO Biological Processes	19	GO:0034205	amyloid-beta formation	-10.6267	57.0652	19.6981	23250	23	124	7	5.64516	2.07257	274|348|351|2931|5621|5663|54103	BIN1|APOE|APP|GSK3A|PRNP|PSEN1|GSAP	-8.72527
Input ID	GO Biological Processes	19	GO:0033619	membrane protein proteolysis	-10.5831	28.6017	15.5441	23250	59	124	9	7.25806	2.3299	102|348|3553|4898|5663|5664|6868|7124|25825	ADAM10|APOE|IL1B|NRDC|PSEN1|PSEN2|ADAM17|TNF|BACE2	-8.68992
Input ID	GO Biological Processes	19	GO:0098916	anterograde trans-synaptic signaling	-10.583	6.15234	9.67848	23250	640	124	21	16.9355	3.36818	177|348|351|488|1499|1956|2911|2931|2932|3553|3630|3845|4137|5071|5566|5621|5663|5743|6622|8878|11315	AGER|APOE|APP|ATP2A2|CTNNB1|EGFR|GRM1|GSK3A|GSK3B|IL1B|INS|KRAS|MAPT|PRKN|PRKACA|PRNP|PSEN1|PTGS2|SNCA|SQSTM1|PARK7	-8.68992
Input ID	GO Biological Processes	19	GO:0007268	chemical synaptic transmission	-10.583	6.15234	9.67848	23250	640	124	21	16.9355	3.36818	177|348|351|488|1499|1956|2911|2931|2932|3553|3630|3845|4137|5071|5566|5621|5663|5743|6622|8878|11315	AGER|APOE|APP|ATP2A2|CTNNB1|EGFR|GRM1|GSK3A|GSK3B|IL1B|INS|KRAS|MAPT|PRKN|PRKACA|PRNP|PSEN1|PTGS2|SNCA|SQSTM1|PARK7	-8.68992
Input ID	GO Biological Processes	19	GO:0010720	positive regulation of cell development	-10.5571	7.0128	10.0336	23250	508	124	19	15.3226	3.23474	151|177|274|348|351|1499|1789|2475|3553|4137|4851|5071|5300|5468|5663|6280|9638|10519|80823	ADRA2B|AGER|BIN1|APOE|APP|CTNNB1|DNMT3B|MTOR|IL1B|MAPT|NOTCH1|PRKN|PIN1|PPARG|PSEN1|S100A9|FEZ1|CIB1|BHLHB9	-8.66568
Input ID	GO Biological Processes	19	GO:0045861	negative regulation of proteolysis	-10.5507	9.03614	10.7992	23250	332	124	16	12.9032	3.0105	274|351|1410|1718|2537|3416|3630|5037|5621|5663|5743|6622|7471|10013|11315|57805	BIN1|APP|CRYAB|DHCR24|IFI6|IDE|INS|PEBP1|PRNP|PSEN1|PTGS2|SNCA|WNT1|HDAC6|PARK7|CCAR2	-8.66093
Input ID	GO Biological Processes	19	GO:0099537	trans-synaptic signaling	-10.5328	6.11413	9.63753	23250	644	124	21	16.9355	3.36818	177|348|351|488|1499|1956|2911|2931|2932|3553|3630|3845|4137|5071|5566|5621|5663|5743|6622|8878|11315	AGER|APOE|APP|ATP2A2|CTNNB1|EGFR|GRM1|GSK3A|GSK3B|IL1B|INS|KRAS|MAPT|PRKN|PRKACA|PRNP|PSEN1|PTGS2|SNCA|SQSTM1|PARK7	-8.64465
Input ID	GO Biological Processes	19	GO:2000147	positive regulation of cell motility	-10.5279	6.98529	10.0078	23250	510	124	19	15.3226	3.23474	102|351|1950|1956|2475|3146|3480|3552|3553|3569|3630|3643|4851|5743|6868|7124|10013|10519|23411	ADAM10|APP|EGF|EGFR|MTOR|HMGB1|IGF1R|IL1A|IL1B|IL6|INS|INSR|NOTCH1|PTGS2|ADAM17|TNF|HDAC6|CIB1|SIRT1	-8.64139
Input ID	GO Biological Processes	19	GO:0052548	regulation of endopeptidase activity	-10.5211	8.19409	10.4777	23250	389	124	17	13.7097	3.08876	274|351|1410|1718|2537|3146|4137|4898|5037|5468|5743|6279|6280|6622|7124|11315|23411	BIN1|APP|CRYAB|DHCR24|IFI6|HMGB1|MAPT|NRDC|PEBP1|PPARG|PTGS2|S100A8|S100A9|SNCA|TNF|PARK7|SIRT1	-8.63704
Input ID	GO Biological Processes	19	GO:0099536	synaptic signaling	-10.5203	6.10465	9.62734	23250	645	124	21	16.9355	3.36818	177|348|351|488|1499|1956|2911|2931|2932|3553|3630|3845|4137|5071|5566|5621|5663|5743|6622|8878|11315	AGER|APOE|APP|ATP2A2|CTNNB1|EGFR|GRM1|GSK3A|GSK3B|IL1B|INS|KRAS|MAPT|PRKN|PRKACA|PRNP|PSEN1|PTGS2|SNCA|SQSTM1|PARK7	-8.63704
Input ID	GO Biological Processes	19	GO:0050890	cognition	-10.516	9.9734	11.1015	23250	282	124	15	12.0968	2.92837	177|348|351|1956|2475|3553|3630|3643|3845|4137|5071|5621|5663|5743|80823	AGER|APOE|APP|EGFR|MTOR|IL1B|INS|INSR|KRAS|MAPT|PRKN|PRNP|PSEN1|PTGS2|BHLHB9	-8.63436
Input ID	GO Biological Processes	19	GO:1903426	regulation of reactive oxygen species biosynthetic process	-10.4894	21.8023	14.152	23250	86	124	10	8.06452	2.44523	2475|3320|3553|3630|3643|5743|6622|7099|7124|11315	MTOR|HSP90AA1|IL1B|INS|INSR|PTGS2|SNCA|TLR4|TNF|PARK7	-8.60937
Input ID	GO Biological Processes	19	GO:0010817	regulation of hormone levels	-10.4843	6.94444	9.96933	23250	513	124	19	15.3226	3.23474	151|846|1956|2099|3416|3553|3569|3630|4826|5037|5071|5653|7124|7351|10273|10891|11315|23410|25825	ADRA2B|CASR|EGFR|ESR1|IDE|IL1B|IL6|INS|NNAT|PEBP1|PRKN|KLK6|TNF|UCP2|STUB1|PPARGC1A|PARK7|SIRT3|BACE2	-8.60589
Input ID	GO Biological Processes	19	GO:0010565	regulation of cellular ketone metabolic process	-10.4271	17.4788	13.1408	23250	118	124	11	8.87097	2.55331	341|672|2475|3630|5465|5468|5743|6622|10891|11315|23411	APOC1|BRCA1|MTOR|INS|PPARA|PPARG|PTGS2|SNCA|PPARGC1A|PARK7|SIRT1	-8.55033
Input ID	GO Biological Processes	19	GO:0031330	negative regulation of cellular catabolic process	-10.3963	10.9833	11.3597	23250	239	124	14	11.2903	2.84202	341|2475|2931|3630|5294|5465|5663|6622|7471|8678|9638|10891|11315|57805	APOC1|MTOR|GSK3A|INS|PIK3CG|PPARA|PSEN1|SNCA|WNT1|BECN1|FEZ1|PPARGC1A|PARK7|CCAR2	-8.52716
Input ID	GO Biological Processes	19	GO:0071396	cellular response to lipid	-10.3767	6.38842	9.68243	23250	587	124	20	16.129	3.30293	338|672|846|1234|1499|1789|1956|2099|2100|3553|3569|5465|5468|5562|7099|7124|10013|10891|11315|23411	APOB|BRCA1|CASR|CCR5|CTNNB1|DNMT3B|EGFR|ESR1|ESR2|IL1B|IL6|PPARA|PPARG|PRKAA1|TLR4|TNF|HDAC6|PPARGC1A|PARK7|SIRT1	-8.51096
Input ID	GO Biological Processes	19	GO:0019221	cytokine-mediated signaling pathway	-10.3678	5.65068	9.34882	23250	730	124	22	17.7419	3.43067	1234|2537|3313|3320|3552|3553|3569|3845|4313|4314|5071|5468|5566|5743|6647|6654|6868|7124|7157|8878|10519|23411	CCR5|IFI6|HSPA9|HSP90AA1|IL1A|IL1B|IL6|KRAS|MMP2|MMP3|PRKN|PPARG|PRKACA|PTGS2|SOD1|SOS1|ADAM17|TNF|TP53|SQSTM1|CIB1|SIRT1	-8.50362
Input ID	Reactome Gene Sets	6	R-HSA-9006925	Intracellular signaling by second messengers	-10.3445	9.69828	10.9146	23250	290	124	15	12.0968	2.92837	1386|1950|1956|2099|2100|2475|2931|2932|3630|3643|5468|5566|7157|9365|10273	ATF2|EGF|EGFR|ESR1|ESR2|MTOR|GSK3A|GSK3B|INS|INSR|PPARG|PRKACA|TP53|KL|STUB1	-8.48495
Input ID	GO Biological Processes	19	GO:0016055	Wnt signaling pathway	-10.3339	7.33696	10.0519	23250	460	124	18	14.5161	3.16342	348|351|1499|1950|1956|2099|2931|2932|4035|4851|5071|5300|5534|5562|5663|7471|51527|57805	APOE|APP|CTNNB1|EGF|EGFR|ESR1|GSK3A|GSK3B|LRP1|NOTCH1|PRKN|PIN1|PPP3R1|PRKAA1|PSEN1|WNT1|GSKIP|CCAR2	-8.47586
Input ID	GO Biological Processes	19	GO:0043491	protein kinase B signaling	-10.3242	10.8471	11.2756	23250	242	124	14	11.2903	2.84202	1950|1956|2099|2475|3320|3553|3630|3643|5294|7124|9365|10519|11315|23411	EGF|EGFR|ESR1|MTOR|HSP90AA1|IL1B|INS|INSR|PIK3CG|TNF|KL|CIB1|PARK7|SIRT1	-8.46915
Input ID	GO Biological Processes	19	GO:0198738	cell-cell signaling by wnt	-10.3032	7.30519	10.0237	23250	462	124	18	14.5161	3.16342	348|351|1499|1950|1956|2099|2931|2932|4035|4851|5071|5300|5534|5562|5663|7471|51527|57805	APOE|APP|CTNNB1|EGF|EGFR|ESR1|GSK3A|GSK3B|LRP1|NOTCH1|PRKN|PIN1|PPP3R1|PRKAA1|PSEN1|WNT1|GSKIP|CCAR2	-8.44967
Input ID	GO Biological Processes	19	GO:0062014	negative regulation of small molecule metabolic process	-10.2888	20.8333	13.8042	23250	90	124	10	8.06452	2.44523	341|348|672|2931|3630|5465|6622|6647|10891|23411	APOC1|APOE|BRCA1|GSK3A|INS|PPARA|SNCA|SOD1|PPARGC1A|SIRT1	-8.43683
Input ID	GO Biological Processes	19	GO:0010675	regulation of cellular carbohydrate metabolic process	-10.2299	16.7683	12.8393	23250	123	124	11	8.87097	2.55331	2475|2931|2932|3146|3630|3643|5071|5465|6622|10891|23411	MTOR|GSK3A|GSK3B|HMGB1|INS|INSR|PRKN|PPARA|SNCA|PPARGC1A|SIRT1	-8.38197
Input ID	GO Biological Processes	19	GO:0007611	learning or memory	-10.2295	10.6707	11.1658	23250	246	124	14	11.2903	2.84202	177|348|351|1956|2475|3553|3643|3845|4137|5071|5621|5663|5743|80823	AGER|APOE|APP|EGFR|MTOR|IL1B|INSR|KRAS|MAPT|PRKN|PRNP|PSEN1|PTGS2|BHLHB9	-8.38197
Input ID	GO Biological Processes	19	GO:0090257	regulation of muscle system process	-10.1595	10.5422	11.085	23250	249	124	14	11.2903	2.84202	151|274|488|2475|2931|4000|4851|5294|5300|5566|5743|6647|8678|10891	ADRA2B|BIN1|ATP2A2|MTOR|GSK3A|LMNA|NOTCH1|PIK3CG|PIN1|PRKACA|PTGS2|SOD1|BECN1|PPARGC1A	-8.31651
Input ID	GO Biological Processes	19	GO:0032355	response to estradiol	-10.1534	16.5	12.7236	23250	125	124	11	8.87097	2.55331	338|1410|1499|1788|1789|1956|2099|3553|4968|5743|10891	APOB|CRYAB|CTNNB1|DNMT3A|DNMT3B|EGFR|ESR1|IL1B|OGG1|PTGS2|PPARGC1A	-8.3133
Input ID	GO Biological Processes	19	GO:0032388	positive regulation of intracellular transport	-10.1384	11.9485	11.501	23250	204	124	13	10.4839	2.75106	2931|2932|3553|5071|5562|5566|5621|5663|5743|7157|9531|9638|10519	GSK3A|GSK3B|IL1B|PRKN|PRKAA1|PRKACA|PRNP|PSEN1|PTGS2|TP53|BAG3|FEZ1|CIB1	-8.30219
Input ID	GO Biological Processes	19	GO:0010506	regulation of autophagy	-10.1375	9.375	10.691	23250	300	124	15	12.0968	2.92837	823|2475|2931|3146|4137|5071|5562|5566|6622|7345|8678|9638|10013|11315|23411	CAPN1|MTOR|GSK3A|HMGB1|MAPT|PRKN|PRKAA1|PRKACA|SNCA|UCHL1|BECN1|FEZ1|HDAC6|PARK7|SIRT1	-8.30219
Input ID	GO Biological Processes	19	GO:0033673	negative regulation of kinase activity	-10.1364	10.5	11.0584	23250	250	124	14	11.2903	2.84202	348|1029|1030|3480|3553|4137|5071|5663|6895|7345|10519|11315|23411|51527	APOE|CDKN2A|CDKN2B|IGF1R|IL1B|MAPT|PRKN|PSEN1|TARBP2|UCHL1|CIB1|PARK7|SIRT1|GSKIP	-8.30219
Input ID	GO Biological Processes	19	GO:0045926	negative regulation of growth	-10.1134	10.4582	11.0319	23250	251	124	14	11.2903	2.84202	1029|1410|2100|2931|3621|4851|5468|5802|7124|7157|7490|8878|23411|57805	CDKN2A|CRYAB|ESR2|GSK3A|ING1|NOTCH1|PPARG|PTPRS|TNF|TP53|WT1|SQSTM1|SIRT1|CCAR2	-8.28064
Input ID	Reactome Gene Sets	6	R-HSA-1236394	Signaling by ERBB4	-10.1045	34.0909	16.0878	23250	44	124	8	6.45161	2.20618	1950|1956|2099|3845|5663|5664|6654|6868	EGF|EGFR|ESR1|KRAS|PSEN1|PSEN2|SOS1|ADAM17	-8.27461
Input ID	GO Biological Processes	19	GO:0051098	regulation of binding	-10.0829	8.40336	10.3223	23250	357	124	16	12.9032	3.0105	177|348|351|1499|1950|2932|3146|4035|5071|5300|5465|5468|5566|5663|10273|11315	AGER|APOE|APP|CTNNB1|EGF|GSK3B|HMGB1|LRP1|PRKN|PIN1|PPARA|PPARG|PRKACA|PSEN1|STUB1|PARK7	-8.25579
Input ID	GO Biological Processes	19	GO:0052547	regulation of peptidase activity	-10.051	7.64388	10.0247	23250	417	124	17	13.7097	3.08876	274|351|1410|1718|2537|3146|4137|4898|5037|5468|5743|6279|6280|6622|7124|11315|23411	BIN1|APP|CRYAB|DHCR24|IFI6|HMGB1|MAPT|NRDC|PEBP1|PPARG|PTGS2|S100A8|S100A9|SNCA|TNF|PARK7|SIRT1	-8.22961
Input ID	GO Biological Processes	19	GO:0071375	cellular response to peptide hormone stimulus	-10.0369	9.22131	10.583	23250	305	124	15	12.0968	2.92837	328|2931|3416|3480|3553|3630|3643|5468|5562|5566|6654|7351|7471|9365|23411	APEX1|GSK3A|IDE|IGF1R|IL1B|INS|INSR|PPARG|PRKAA1|PRKACA|SOS1|UCP2|WNT1|KL|SIRT1	-8.21824
Input ID	GO Biological Processes	19	GO:0043281	regulation of cysteine-type endopeptidase activity involved in apoptotic process	-10.0332	11.7188	11.3705	23250	208	124	13	10.4839	2.75106	1410|1718|2537|3146|4137|5468|5743|6279|6280|6622|7124|11315|23411	CRYAB|DHCR24|IFI6|HMGB1|MAPT|PPARG|PTGS2|S100A8|S100A9|SNCA|TNF|PARK7|SIRT1	-8.21596
Input ID	GO Biological Processes	19	GO:1900034	regulation of cellular response to heat	-10.0215	33.3333	15.8975	23250	45	124	8	6.45161	2.20618	1410|2475|2932|3320|4137|9531|23411|57805	CRYAB|MTOR|GSK3B|HSP90AA1|MAPT|BAG3|SIRT1|CCAR2	-8.20702
Input ID	GO Biological Processes	19	GO:0030111	regulation of Wnt signaling pathway	-9.99717	9.16124	10.5405	23250	307	124	15	12.0968	2.92837	348|351|1950|1956|2099|2931|2932|4035|4851|5071|5300|5663|7471|51527|57805	APOE|APP|EGF|EGFR|ESR1|GSK3A|GSK3B|LRP1|NOTCH1|PRKN|PIN1|PSEN1|WNT1|GSKIP|CCAR2	-8.18549
Input ID	GO Biological Processes	19	GO:0007584	response to nutrient	-9.98141	11.6071	11.3065	23250	210	124	13	10.4839	2.75106	846|1030|1788|1789|1956|2475|3553|4968|5468|5743|6647|7352|8678	CASR|CDKN2B|DNMT3A|DNMT3B|EGFR|MTOR|IL1B|OGG1|PPARG|PTGS2|SOD1|UCP3|BECN1	-8.17176
Input ID	Reactome Gene Sets	6	R-HSA-1257604	PIP3 activates AKT signaling	-9.9776	10.214	10.8763	23250	257	124	14	11.2903	2.84202	1386|1950|1956|2099|2100|2475|2931|2932|3630|3643|5468|7157|9365|10273	ATF2|EGF|EGFR|ESR1|ESR2|MTOR|GSK3A|GSK3B|INS|INSR|PPARG|TP53|KL|STUB1	-8.17137
Input ID	GO Biological Processes	19	GO:0031647	regulation of protein stability	-9.9776	10.214	10.8763	23250	257	124	14	11.2903	2.84202	1410|3320|3845|5071|5300|5621|6622|9531|10013|10273|10891|11315|23411|57805	CRYAB|HSP90AA1|KRAS|PRKN|PIN1|PRNP|SNCA|BAG3|HDAC6|STUB1|PPARGC1A|PARK7|SIRT1|CCAR2	-8.17137
Input ID	GO Biological Processes	19	GO:0045834	positive regulation of lipid metabolic process	-9.96795	15.8654	12.4456	23250	130	124	11	8.87097	2.55331	341|348|2475|3553|3630|5465|5468|5562|5743|7124|10891	APOC1|APOE|MTOR|IL1B|INS|PPARA|PPARG|PRKAA1|PTGS2|TNF|PPARGC1A	-8.16308
Input ID	GO Biological Processes	19	GO:0031334	positive regulation of protein complex assembly	-9.9331	10.1351	10.8255	23250	259	124	14	11.2903	2.84202	274|1499|2099|2475|2932|3320|3416|4137|4314|7099|7124|7157|10013|10273	BIN1|CTNNB1|ESR1|MTOR|GSK3B|HSP90AA1|IDE|MAPT|MMP3|TLR4|TNF|TP53|HDAC6|STUB1	-8.12958
Input ID	KEGG Pathway	24	hsa04915	Estrogen signaling pathway	-9.91548	19.1327	13.1717	23250	98	124	10	8.06452	2.44523	1386|1956|2099|2100|2911|3320|3845|4313|5566|6654	ATF2|EGFR|ESR1|ESR2|GRM1|HSP90AA1|KRAS|MMP2|PRKACA|SOS1	-8.11709
Input ID	GO Biological Processes	19	GO:0019722	calcium-mediated signaling	-9.90477	11.4437	11.2122	23250	213	124	13	10.4839	2.75106	488|1234|1827|1956|2475|2932|4137|5534|5562|5566|5621|7124|10519	ATP2A2|CCR5|RCAN1|EGFR|MTOR|GSK3B|MAPT|PPP3R1|PRKAA1|PRKACA|PRNP|TNF|CIB1	-8.11059
Input ID	GO Biological Processes	19	GO:0055080	cation homeostasis	-9.88875	5.64112	9.11634	23250	698	124	21	16.9355	3.36818	348|351|488|846|1234|1956|2099|2911|3146|3553|5071|5294|5566|5621|5663|6279|6280|6622|6647|9365|9429	APOE|APP|ATP2A2|CASR|CCR5|EGFR|ESR1|GRM1|HMGB1|IL1B|PRKN|PIK3CG|PRKACA|PRNP|PSEN1|S100A8|S100A9|SNCA|SOD1|KL|ABCG2	-8.09656
Input ID	GO Biological Processes	19	GO:0002521	leukocyte differentiation	-9.88811	6.88776	9.64549	23250	490	124	18	14.5161	3.16342	177|351|1499|2475|3146|3553|3569|5468|5663|6647|6654|6868|7099|7124|7471|9644|23411|28514	AGER|APP|CTNNB1|MTOR|HMGB1|IL1B|IL6|PPARG|PSEN1|SOD1|SOS1|ADAM17|TLR4|TNF|WNT1|SH3PXD2A|SIRT1|DLL1	-8.09656
Input ID	GO Biological Processes	19	GO:0045732	positive regulation of protein catabolic process	-9.87949	11.3902	11.1812	23250	214	124	13	10.4839	2.75106	348|1950|2931|2932|3320|3416|3553|4035|4898|5071|5663|7124|10273	APOE|EGF|GSK3A|GSK3B|HSP90AA1|IDE|IL1B|LRP1|NRDC|PRKN|PSEN1|TNF|STUB1	-8.08925
Input ID	GO Biological Processes	19	GO:0051099	positive regulation of binding	-9.87753	13.1579	11.6845	23250	171	124	12	9.67742	2.65502	348|351|1499|1950|2932|3146|4035|5071|5300|5468|5663|11315	APOE|APP|CTNNB1|EGF|GSK3B|HMGB1|LRP1|PRKN|PIN1|PPARG|PSEN1|PARK7	-8.0886
Input ID	GO Biological Processes	19	GO:0071496	cellular response to external stimulus	-9.86037	8.95701	10.3949	23250	314	124	15	12.0968	2.92837	846|1030|1956|2475|3553|5468|5562|5743|6647|7099|7157|7351|8678|9531|23411	CASR|CDKN2B|EGFR|MTOR|IL1B|PPARG|PRKAA1|PTGS2|SOD1|TLR4|TP53|UCP2|BECN1|BAG3|SIRT1	-8.07274
Input ID	GO Biological Processes	19	GO:0017144	drug metabolic process	-9.83002	5.29525	8.92912	23250	779	124	22	17.7419	3.43067	217|1956|2475|3320|3416|3553|3630|3643|4314|5037|5071|5465|5562|5743|6622|6647|7099|7124|8574|10013|10891|11315	ALDH2|EGFR|MTOR|HSP90AA1|IDE|IL1B|INS|INSR|MMP3|PEBP1|PRKN|PPARA|PRKAA1|PTGS2|SNCA|SOD1|TLR4|TNF|AKR7A2|HDAC6|PPARGC1A|PARK7	-8.04369
Input ID	GO Biological Processes	19	GO:0010821	regulation of mitochondrion organization	-9.81878	13.0058	11.6061	23250	173	124	12	9.67742	2.65502	2931|2932|4000|4137|5071|5562|7157|8878|9531|10013|10891|11315	GSK3A|GSK3B|LMNA|MAPT|PRKN|PRKAA1|TP53|SQSTM1|BAG3|HDAC6|PPARGC1A|PARK7	-8.03633
Input ID	GO Biological Processes	19	GO:1903209	positive regulation of oxidative stress-induced cell death	-9.80647	70.3125	20.3082	23250	16	124	6	4.83871	1.92701	4314|5074|6647|7099|10013|11315	MMP3|PAWR|SOD1|TLR4|HDAC6|PARK7	-8.02657
Input ID	GO Biological Processes	19	GO:0051962	positive regulation of nervous system development	-9.80272	6.80444	9.5683	23250	496	124	18	14.5161	3.16342	151|177|274|348|351|1499|1789|1950|2475|3553|4137|4851|5071|5468|5663|6280|9638|80823	ADRA2B|AGER|BIN1|APOE|APP|CTNNB1|DNMT3B|EGF|MTOR|IL1B|MAPT|NOTCH1|PRKN|PPARG|PSEN1|S100A9|FEZ1|BHLHB9	-8.02411
Input ID	GO Biological Processes	19	GO:0050769	positive regulation of neurogenesis	-9.79828	7.36143	9.78436	23250	433	124	17	13.7097	3.08876	151|177|274|348|351|1499|1789|2475|3553|4137|4851|5071|5468|5663|6280|9638|80823	ADRA2B|AGER|BIN1|APOE|APP|CTNNB1|DNMT3B|MTOR|IL1B|MAPT|NOTCH1|PRKN|PPARG|PSEN1|S100A9|FEZ1|BHLHB9	-8.02094
Input ID	GO Biological Processes	19	GO:0033135	regulation of peptidyl-serine phosphorylation	-9.79017	15.2778	12.1827	23250	135	124	11	8.87097	2.55331	351|1956|2931|3320|3569|5562|5743|6622|7124|10013|11315	APP|EGFR|GSK3A|HSP90AA1|IL6|PRKAA1|PTGS2|SNCA|TNF|HDAC6|PARK7	-8.01613
Input ID	GO Biological Processes	19	GO:0043112	receptor metabolic process	-9.78969	12.931	11.5674	23250	174	124	12	9.67742	2.65502	348|823|1950|4035|5465|5468|5663|6622|7124|8678|10013|11315	APOE|CAPN1|EGF|LRP1|PPARA|PPARG|PSEN1|SNCA|TNF|BECN1|HDAC6|PARK7	-8.01613
Input ID	GO Biological Processes	19	GO:0010906	regulation of glucose metabolic process	-9.78402	18.5644	12.9536	23250	101	124	10	8.06452	2.44523	2475|2931|2932|3146|3630|3643|5071|5465|10891|23411	MTOR|GSK3A|GSK3B|HMGB1|INS|INSR|PRKN|PPARA|PPARGC1A|SIRT1	-8.01298
Input ID	GO Biological Processes	19	GO:1905114	cell surface receptor signaling pathway involved in cell-cell signaling	-9.75969	6.29417	9.33703	23250	566	124	19	15.3226	3.23474	348|351|1499|1950|1956|2099|2931|2932|4035|4851|5071|5300|5534|5562|5663|6622|7471|51527|57805	APOE|APP|CTNNB1|EGF|EGFR|ESR1|GSK3A|GSK3B|LRP1|NOTCH1|PRKN|PIN1|PPP3R1|PRKAA1|PSEN1|SNCA|WNT1|GSKIP|CCAR2	-7.99526
Input ID	GO Biological Processes	19	GO:0043406	positive regulation of MAP kinase activity	-9.75886	9.83146	10.6279	23250	267	124	14	11.2903	2.84202	151|177|1950|1956|2911|3553|3643|3845|5294|5562|5663|6647|7099|7124	ADRA2B|AGER|EGF|EGFR|GRM1|IL1B|INSR|KRAS|PIK3CG|PRKAA1|PSEN1|SOD1|TLR4|TNF	-7.99526
Input ID	GO Biological Processes	19	GO:0043524	negative regulation of neuron apoptotic process	-9.75549	15.1654	12.1318	23250	136	124	11	8.87097	2.55331	348|3845|4035|5071|5300|5663|6622|6647|10891|11315|80823	APOE|KRAS|LRP1|PRKN|PIN1|PSEN1|SNCA|SOD1|PPARGC1A|PARK7|BHLHB9	-7.99331
Input ID	GO Biological Processes	19	GO:0098771	inorganic ion homeostasis	-9.75362	5.54577	9.00789	23250	710	124	21	16.9355	3.36818	348|351|488|846|1234|1956|2099|2911|3146|3553|5071|5294|5566|5621|5663|6279|6280|6622|6647|9365|9429	APOE|APP|ATP2A2|CASR|CCR5|EGFR|ESR1|GRM1|HMGB1|IL1B|PRKN|PIK3CG|PRKACA|PRNP|PSEN1|S100A8|S100A9|SNCA|SOD1|KL|ABCG2	-7.99331
Input ID	GO Biological Processes	19	GO:0008015	blood circulation	-9.74646	6.75	9.51754	23250	500	124	18	14.5161	3.16342	151|274|348|488|846|1827|1956|2475|2931|3630|5037|5294|5465|5468|5566|5743|6647|28514	ADRA2B|BIN1|APOE|ATP2A2|CASR|RCAN1|EGFR|MTOR|GSK3A|INS|PEBP1|PIK3CG|PPARA|PPARG|PRKACA|PTGS2|SOD1|DLL1	-7.98776
Input ID	GO Biological Processes	19	GO:0051896	regulation of protein kinase B signaling	-9.7305	11.0795	10.9994	23250	220	124	13	10.4839	2.75106	1950|1956|2099|2475|3320|3630|3643|5294|7124|9365|10519|11315|23411	EGF|EGFR|ESR1|MTOR|HSP90AA1|INS|INSR|PIK3CG|TNF|KL|CIB1|PARK7|SIRT1	-7.97543
Input ID	GO Biological Processes	19	GO:0033138	positive regulation of peptidyl-serine phosphorylation	-9.69874	18.2039	12.8133	23250	103	124	10	8.06452	2.44523	351|1956|2931|3320|3569|5743|6622|7124|10013|11315	APP|EGFR|GSK3A|HSP90AA1|IL6|PTGS2|SNCA|TNF|HDAC6|PARK7	-7.94727
Input ID	GO Biological Processes	19	GO:1990535	neuron projection maintenance	-9.65766	117.188	24.0675	23250	8	124	5	4.03226	1.76655	351|3630|3643|5621|5663	APP|INS|INSR|PRNP|PSEN1	-7.91213
Input ID	GO Biological Processes	19	GO:0003013	circulatory system process	-9.63548	6.6437	9.41769	23250	508	124	18	14.5161	3.16342	151|274|348|488|846|1827|1956|2475|2931|3630|5037|5294|5465|5468|5566|5743|6647|28514	ADRA2B|BIN1|APOE|ATP2A2|CASR|RCAN1|EGFR|MTOR|GSK3A|INS|PEBP1|PIK3CG|PPARA|PPARG|PRKACA|PTGS2|SOD1|DLL1	-7.89162
Input ID	GO Biological Processes	19	GO:0050994	regulation of lipid catabolic process	-9.63479	30	15.0315	23250	50	124	8	6.45161	2.20618	341|2475|3553|3630|5294|5465|5562|7124	APOC1|MTOR|IL1B|INS|PIK3CG|PPARA|PRKAA1|TNF	-7.89162
Input ID	GO Biological Processes	19	GO:0042593	glucose homeostasis	-9.58596	10.7854	10.8244	23250	226	124	13	10.4839	2.75106	177|846|3480|3553|3630|3643|5468|5562|5566|7351|10891|11315|23411	AGER|CASR|IGF1R|IL1B|INS|INSR|PPARG|PRKAA1|PRKACA|UCP2|PPARGC1A|PARK7|SIRT1	-7.8463
Input ID	GO Biological Processes	19	GO:0060627	regulation of vesicle-mediated transport	-9.57087	7.11496	9.56993	23250	448	124	17	13.7097	3.08876	274|341|348|351|488|1950|3146|3553|4035|4851|5071|5468|5562|5663|6622|7124|28514	BIN1|APOC1|APOE|APP|ATP2A2|EGF|HMGB1|IL1B|LRP1|NOTCH1|PRKN|PPARG|PRKAA1|PSEN1|SNCA|TNF|DLL1	-7.83237
Input ID	GO Biological Processes	19	GO:0042180	cellular ketone metabolic process	-9.56338	12.3626	11.2687	23250	182	124	12	9.67742	2.65502	341|672|2475|3630|5465|5468|5743|6622|8574|10891|11315|23411	APOC1|BRCA1|MTOR|INS|PPARA|PPARG|PTGS2|SNCA|AKR7A2|PPARGC1A|PARK7|SIRT1	-7.8261
Input ID	GO Biological Processes	19	GO:0033500	carbohydrate homeostasis	-9.56229	10.7379	10.7959	23250	227	124	13	10.4839	2.75106	177|846|3480|3553|3630|3643|5468|5562|5566|7351|10891|11315|23411	AGER|CASR|IGF1R|IL1B|INS|INSR|PPARG|PRKAA1|PRKACA|UCP2|PPARGC1A|PARK7|SIRT1	-7.8261
Input ID	GO Biological Processes	19	GO:0018105	peptidyl-serine phosphorylation	-9.52859	9.44245	10.3694	23250	278	124	14	11.2903	2.84202	351|1956|2475|2931|2932|3320|3569|5562|5566|5743|6622|7124|10013|11315	APP|EGFR|MTOR|GSK3A|GSK3B|HSP90AA1|IL6|PRKAA1|PRKACA|PTGS2|SNCA|TNF|HDAC6|PARK7	-7.79471
Input ID	GO Biological Processes	19	GO:0051092	positive regulation of NF-kappaB transcription factor activity	-9.52026	14.4231	11.7899	23250	143	124	11	8.87097	2.55331	177|351|3553|3569|3630|3845|6279|6280|7099|7124|10519	AGER|APP|IL1B|IL6|INS|KRAS|S100A8|S100A9|TLR4|TNF|CIB1	-7.78867
Input ID	GO Biological Processes	19	GO:0150076	neuroinflammatory response	-9.5063	41.0156	16.5865	23250	32	124	7	5.64516	2.07257	177|351|1956|4035|4137|5663|6622	AGER|APP|EGFR|LRP1|MAPT|PSEN1|SNCA	-7.77699
Input ID	GO Biological Processes	19	GO:0061900	glial cell activation	-9.5063	41.0156	16.5865	23250	32	124	7	5.64516	2.07257	177|351|1956|4035|4137|5663|6622	AGER|APP|EGFR|LRP1|MAPT|PSEN1|SNCA	-7.77699
Input ID	GO Biological Processes	19	GO:2000116	regulation of cysteine-type endopeptidase activity	-9.49195	10.5978	10.7114	23250	230	124	13	10.4839	2.75106	1410|1718|2537|3146|4137|5468|5743|6279|6280|6622|7124|11315|23411	CRYAB|DHCR24|IFI6|HMGB1|MAPT|PPARG|PTGS2|S100A8|S100A9|SNCA|TNF|PARK7|SIRT1	-7.76604
Input ID	GO Biological Processes	19	GO:0071236	cellular response to antibiotic	-9.48769	14.3229	11.743	23250	144	124	11	8.87097	2.55331	328|1788|3553|3569|5074|5562|7157|8678|10013|11315|23411	APEX1|DNMT3A|IL1B|IL6|PAWR|PRKAA1|TP53|BECN1|HDAC6|PARK7|SIRT1	-7.7629
Input ID	GO Biological Processes	19	GO:1902003	regulation of amyloid-beta formation	-9.44511	62.5	19.1131	23250	18	124	6	4.83871	1.92701	274|348|351|2931|5621|54103	BIN1|APOE|APP|GSK3A|PRNP|GSAP	-7.72368
Input ID	GO Biological Processes	19	GO:0003006	developmental process involved in reproduction	-9.42363	5.6391	8.88786	23250	665	124	20	16.129	3.30293	682|1499|1718|1956|2099|2475|3552|3553|3643|4851|5037|5468|5566|5654|5743|6647|6895|7490|10519|23411	BSG|CTNNB1|DHCR24|EGFR|ESR1|MTOR|IL1A|IL1B|INSR|NOTCH1|PEBP1|PPARG|PRKACA|HTRA1|PTGS2|SOD1|TARBP2|WT1|CIB1|SIRT1	-7.70333
Input ID	GO Biological Processes	19	GO:0015850	organic hydroxy compound transport	-9.39975	10.4167	10.6011	23250	234	124	13	10.4839	2.75106	151|338|341|348|1950|3553|4035|5071|5468|6622|9429|11315|23411	ADRA2B|APOB|APOC1|APOE|EGF|IL1B|LRP1|PRKN|PPARG|SNCA|ABCG2|PARK7|SIRT1	-7.68166
Input ID	GO Biological Processes	19	GO:1903362	regulation of cellular protein catabolic process	-9.37697	10.3723	10.574	23250	235	124	13	10.4839	2.75106	348|1950|2931|2932|3320|4035|5071|5566|5663|7471|10273|11315|57805	APOE|EGF|GSK3A|GSK3B|HSP90AA1|LRP1|PRKN|PRKACA|PSEN1|WNT1|STUB1|PARK7|CCAR2	-7.66359
Input ID	GO Biological Processes	19	GO:0043062	extracellular structure organization	-9.35905	7.5	9.60203	23250	400	124	16	12.9032	3.0105	102|338|341|348|351|682|4035|4313|4314|4851|5566|5654|7124|7490|8038|9644	ADAM10|APOB|APOC1|APOE|APP|BSG|LRP1|MMP2|MMP3|NOTCH1|PRKACA|HTRA1|TNF|WT1|ADAM12|SH3PXD2A	-7.64756
Input ID	GO Biological Processes	19	GO:1903428	positive regulation of reactive oxygen species biosynthetic process	-9.35516	27.7778	14.4254	23250	54	124	8	6.45161	2.20618	2475|3320|3553|3643|5743|7099|7124|11315	MTOR|HSP90AA1|IL1B|INSR|PTGS2|TLR4|TNF|PARK7	-7.64499
Input ID	GO Biological Processes	19	GO:0030100	regulation of endocytosis	-9.3543	10.3284	10.547	23250	236	124	13	10.4839	2.75106	274|341|348|351|1950|3146|3553|4035|5468|5663|6622|7124|28514	BIN1|APOC1|APOE|APP|EGF|HMGB1|IL1B|LRP1|PPARG|PSEN1|SNCA|TNF|DLL1	-7.64499
Input ID	GO Biological Processes	19	GO:0019218	regulation of steroid metabolic process	-9.33619	16.7411	12.2277	23250	112	124	10	8.06452	2.44523	338|341|348|3553|5562|6647|7124|10273|10891|23411	APOB|APOC1|APOE|IL1B|PRKAA1|SOD1|TNF|STUB1|PPARGC1A|SIRT1	-7.63012
Input ID	GO Biological Processes	19	GO:0060322	head development	-9.32211	5.25	8.66345	23250	750	124	21	16.9355	3.36818	351|1499|1950|1956|2475|2932|3845|4035|4313|4826|4851|5037|5663|5802|6654|7471|7515|9531|9638|10891|28514	APP|CTNNB1|EGF|EGFR|MTOR|GSK3B|KRAS|LRP1|MMP2|NNAT|NOTCH1|PEBP1|PSEN1|PTPRS|SOS1|WNT1|XRCC1|BAG3|FEZ1|PPARGC1A|DLL1	-7.61711
Input ID	Canonical Pathways	11	M17761	ST WNT BETA CATENIN PATHWAY	-9.30647	38.6029	16.0668	23250	34	124	7	5.64516	2.07257	1499|2931|2932|3921|4035|5300|5663	CTNNB1|GSK3A|GSK3B|RPSA|LRP1|PIN1|PSEN1	-7.60256
Input ID	GO Biological Processes	19	GO:0032722	positive regulation of chemokine production	-9.28882	27.2727	14.2841	23250	55	124	8	6.45161	2.20618	177|3146|3552|3553|3569|6868|7099|7124	AGER|HMGB1|IL1A|IL1B|IL6|ADAM17|TLR4|TNF	-7.58811
Input ID	GO Biological Processes	19	GO:0034762	regulation of transmembrane transport	-9.23672	6.27323	9.06157	23250	538	124	18	14.5161	3.16342	274|351|823|2475|2931|3553|3630|3643|5243|5294|5562|5566|5621|5663|6622|7124|10891|11315	BIN1|APP|CAPN1|MTOR|GSK3A|IL1B|INS|INSR|ABCB1|PIK3CG|PRKAA1|PRKACA|PRNP|PSEN1|SNCA|TNF|PPARGC1A|PARK7	-7.53918
Input ID	GO Biological Processes	19	GO:0006006	glucose metabolic process	-9.2181	11.5385	10.8212	23250	195	124	12	9.67742	2.65502	2475|2931|2932|3146|3630|3643|5071|5465|5562|7124|10891|23411	MTOR|GSK3A|GSK3B|HMGB1|INS|INSR|PRKN|PPARA|PRKAA1|TNF|PPARGC1A|SIRT1	-7.52267
Input ID	KEGG Pathway	24	hsa05020	Prion diseases	-9.21148	37.5	15.8236	23250	35	124	7	5.64516	2.07257	3552|3553|3569|4851|5566|5621|6647	IL1A|IL1B|IL6|NOTCH1|PRKACA|PRNP|SOD1	-7.51816
Input ID	GO Biological Processes	19	GO:0010469	regulation of signaling receptor activity	-9.18551	6.22694	9.01613	23250	542	124	18	14.5161	3.16342	177|351|823|1950|3146|3552|3553|3569|3630|4137|5663|6868|7124|7471|9365|10013|10891|11315	AGER|APP|CAPN1|EGF|HMGB1|IL1A|IL1B|IL6|INS|MAPT|PSEN1|ADAM17|TNF|WNT1|KL|HDAC6|PPARGC1A|PARK7	-7.49499
Input ID	KEGG Pathway	24	hsa04919	Thyroid hormone signaling pathway	-9.18518	16.1638	11.9888	23250	116	124	10	8.06452	2.44523	488|1499|1827|2099|2475|2932|3845|4851|5566|7157	ATP2A2|CTNNB1|RCAN1|ESR1|MTOR|GSK3B|KRAS|NOTCH1|PRKACA|TP53	-7.49499
Input ID	GO Biological Processes	19	GO:0048871	multicellular organismal homeostasis	-9.17327	7.99006	9.67645	23250	352	124	15	12.0968	2.92837	1499|1956|3552|3553|3569|3845|4851|5562|5566|5743|6647|7099|7124|10891|28514	CTNNB1|EGFR|IL1A|IL1B|IL6|KRAS|NOTCH1|PRKAA1|PRKACA|PTGS2|SOD1|TLR4|TNF|PPARGC1A|DLL1	-7.48514
Input ID	GO Biological Processes	19	GO:0043255	regulation of carbohydrate biosynthetic process	-9.16474	20.0893	12.8341	23250	84	124	9	7.25806	2.3299	1950|2475|2931|2932|3630|3643|5465|6622|10891	EGF|MTOR|GSK3A|GSK3B|INS|INSR|PPARA|SNCA|PPARGC1A	-7.47868
Input ID	GO Biological Processes	19	GO:0018209	peptidyl-serine modification	-9.15397	8.83838	9.95515	23250	297	124	14	11.2903	2.84202	351|1956|2475|2931|2932|3320|3569|5562|5566|5743|6622|7124|10013|11315	APP|EGFR|MTOR|GSK3A|GSK3B|HSP90AA1|IL6|PRKAA1|PRKACA|PTGS2|SNCA|TNF|HDAC6|PARK7	-7.46894
Input ID	GO Biological Processes	19	GO:0090316	positive regulation of intracellular protein transport	-9.14503	13.3065	11.2565	23250	155	124	11	8.87097	2.55331	2931|2932|3553|5562|5566|5621|5663|5743|7157|9531|10519	GSK3A|GSK3B|IL1B|PRKAA1|PRKACA|PRNP|PSEN1|PTGS2|TP53|BAG3|CIB1	-7.46103
Input ID	GO Biological Processes	19	GO:0071241	cellular response to inorganic substance	-9.06724	11.194	10.6287	23250	201	124	12	9.67742	2.65502	1956|2931|4314|4968|5071|5562|5621|5743|6622|6647|8678|10891	EGFR|GSK3A|MMP3|OGG1|PRKN|PRKAA1|PRNP|PTGS2|SNCA|SOD1|BECN1|PPARGC1A	-7.39135
Input ID	GO Biological Processes	19	GO:0002009	morphogenesis of an epithelium	-9.05913	6.58574	9.09333	23250	484	124	17	13.7097	3.08876	846|1499|1950|1956|2099|2475|3845|4851|5534|5566|5663|6654|6868|7124|7471|7490|28514	CASR|CTNNB1|EGF|EGFR|ESR1|MTOR|KRAS|NOTCH1|PPP3R1|PRKACA|PSEN1|SOS1|ADAM17|TNF|WNT1|WT1|DLL1	-7.38425
Input ID	GO Biological Processes	19	GO:0071456	cellular response to hypoxia	-9.02702	12.9717	11.0916	23250	159	124	11	8.87097	2.55331	846|1788|2475|4000|4851|5562|5743|7157|10273|10891|23411	CASR|DNMT3A|MTOR|LMNA|NOTCH1|PRKAA1|PTGS2|TP53|STUB1|PPARGC1A|SIRT1	-7.35314
Input ID	GO Biological Processes	19	GO:0006875	cellular metal ion homeostasis	-8.98503	6.04839	8.83886	23250	558	124	18	14.5161	3.16342	348|351|488|846|1234|2099|2911|3146|3553|5294|5566|5621|5663|6279|6280|6622|6647|9429	APOE|APP|ATP2A2|CASR|CCR5|ESR1|GRM1|HMGB1|IL1B|PIK3CG|PRKACA|PRNP|PSEN1|S100A8|S100A9|SNCA|SOD1|ABCG2	-7.31513
Input ID	Reactome Gene Sets	6	R-HSA-3371556	Cellular response to heat stress	-8.9816	19.1761	12.5089	23250	88	124	9	7.25806	2.3299	1410|2475|2932|3313|3320|9531|10013|23411|57805	CRYAB|MTOR|GSK3B|HSPA9|HSP90AA1|BAG3|HDAC6|SIRT1|CCAR2	-7.31269
Input ID	GO Biological Processes	19	GO:0030307	positive regulation of cell growth	-8.96924	12.8106	11.0114	23250	161	124	11	8.87097	2.55331	102|1956|2475|3630|4137|5071|5300|6279|6280|6868|10519	ADAM10|EGFR|MTOR|INS|MAPT|PRKN|PIN1|S100A8|S100A9|ADAM17|CIB1	-7.3023
Input ID	GO Biological Processes	19	GO:0043269	regulation of ion transport	-8.961	5.63687	8.65404	23250	632	124	19	15.3226	3.23474	274|348|351|823|846|1499|1950|2475|3553|5071|5243|5294|5566|5621|5663|5743|6622|10891|11315	BIN1|APOE|APP|CAPN1|CASR|CTNNB1|EGF|MTOR|IL1B|PRKN|ABCB1|PIK3CG|PRKACA|PRNP|PSEN1|PTGS2|SNCA|PPARGC1A|PARK7	-7.29799
Input ID	GO Biological Processes	19	GO:0001817	regulation of cytokine production	-8.961	5.63687	8.65404	23250	632	124	19	15.3226	3.23474	177|672|1386|1499|3146|3552|3553|3569|3630|5300|5621|5743|5802|6647|6868|7099|7124|11315|28514	AGER|BRCA1|ATF2|CTNNB1|HMGB1|IL1A|IL1B|IL6|INS|PIN1|PRNP|PTGS2|PTPRS|SOD1|ADAM17|TLR4|TNF|PARK7|DLL1	-7.29799
Input ID	GO Biological Processes	19	GO:0045687	positive regulation of glial cell differentiation	-8.94382	34.5395	15.1515	23250	38	124	7	5.64516	2.07257	177|274|351|2475|3553|4851|5468	AGER|BIN1|APP|MTOR|IL1B|NOTCH1|PPARG	-7.28275
Input ID	GO Biological Processes	19	GO:0007420	brain development	-8.94259	5.28914	8.49316	23250	709	124	20	16.129	3.30293	351|1499|1950|1956|2475|2932|3845|4035|4826|4851|5037|5663|5802|6654|7471|7515|9531|9638|10891|28514	APP|CTNNB1|EGF|EGFR|MTOR|GSK3B|KRAS|LRP1|NNAT|NOTCH1|PEBP1|PSEN1|PTPRS|SOS1|WNT1|XRCC1|BAG3|FEZ1|PPARGC1A|DLL1	-7.2825
Input ID	GO Biological Processes	19	GO:0051897	positive regulation of protein kinase B signaling	-8.94064	12.7315	10.9719	23250	162	124	11	8.87097	2.55331	1950|1956|2099|2475|3320|3630|3643|5294|7124|9365|11315	EGF|EGFR|ESR1|MTOR|HSP90AA1|INS|INSR|PIK3CG|TNF|KL|PARK7	-7.28152
Input ID	GO Biological Processes	19	GO:0050808	synapse organization	-8.91288	8.46774	9.69251	23250	310	124	14	11.2903	2.84202	348|351|1499|3480|3630|3643|4137|4898|5300|5621|5663|6622|10013|80823	APOE|APP|CTNNB1|IGF1R|INS|INSR|MAPT|NRDC|PIN1|PRNP|PSEN1|SNCA|HDAC6|BHLHB9	-7.25665
Input ID	GO Biological Processes	19	GO:0051235	maintenance of location	-8.91288	8.46774	9.69251	23250	310	124	14	11.2903	2.84202	338|348|1234|3553|3569|5465|5468|5566|6279|6280|6622|7124|11315|23411	APOB|APOE|CCR5|IL1B|IL6|PPARA|PPARG|PRKACA|S100A8|S100A9|SNCA|TNF|PARK7|SIRT1	-7.25665
Input ID	GO Biological Processes	19	GO:0032869	cellular response to insulin stimulus	-8.89743	10.8173	10.4142	23250	208	124	12	9.67742	2.65502	2931|3416|3480|3553|3630|3643|5468|5562|6654|7351|9365|23411	GSK3A|IDE|IGF1R|IL1B|INS|INSR|PPARG|PRKAA1|SOS1|UCP2|KL|SIRT1	-7.24311
Input ID	GO Biological Processes	19	GO:0031960	response to corticosteroid	-8.88403	12.5762	10.8937	23250	164	124	11	8.87097	2.55331	1789|1956|3146|3553|3569|3845|4851|5037|5743|7124|7352	DNMT3B|EGFR|HMGB1|IL1B|IL6|KRAS|NOTCH1|PEBP1|PTGS2|TNF|UCP3	-7.23257
Input ID	GO Biological Processes	19	GO:0032881	regulation of polysaccharide metabolic process	-8.85982	33.6538	14.9445	23250	39	124	7	5.64516	2.07257	1950|2475|2931|2932|3146|3630|3643	EGF|MTOR|GSK3A|GSK3B|HMGB1|INS|INSR	-7.20931
Input ID	GO Biological Processes	19	GO:0045685	regulation of glial cell differentiation	-8.85876	24.1935	13.3904	23250	62	124	8	6.45161	2.20618	177|274|351|1499|2475|3553|4851|5468	AGER|BIN1|APP|CTNNB1|MTOR|IL1B|NOTCH1|PPARG	-7.2092
Input ID	GO Biological Processes	19	GO:0050995	negative regulation of lipid catabolic process	-8.84853	51.1364	17.2274	23250	22	124	6	4.83871	1.92701	341|3553|3630|5294|5562|7124	APOC1|IL1B|INS|PIK3CG|PRKAA1|TNF	-7.19992
Input ID	GO Biological Processes	19	GO:0002793	positive regulation of peptide secretion	-8.84029	9.375	9.94408	23250	260	124	13	10.4839	2.75106	846|1956|3146|3552|3553|3569|3630|4826|6279|6280|7099|7124|23410	CASR|EGFR|HMGB1|IL1A|IL1B|IL6|INS|NNAT|S100A8|S100A9|TLR4|TNF|SIRT3	-7.19356
Input ID	Reactome Gene Sets	6	R-HSA-8953897	Cellular responses to external stimuli	-8.7806	6.31188	8.83718	23250	505	124	17	13.7097	3.08876	1029|1030|1410|2475|2932|3313|3320|3552|3569|5562|6647|7157|8678|9531|10013|23411|57805	CDKN2A|CDKN2B|CRYAB|MTOR|GSK3B|HSPA9|HSP90AA1|IL1A|IL6|PRKAA1|SOD1|TP53|BECN1|BAG3|HDAC6|SIRT1|CCAR2	-7.13668
Input ID	GO Biological Processes	19	GO:0036294	cellular response to decreased oxygen levels	-8.77306	12.2768	10.7415	23250	168	124	11	8.87097	2.55331	846|1788|2475|4000|4851|5562|5743|7157|10273|10891|23411	CASR|DNMT3A|MTOR|LMNA|NOTCH1|PRKAA1|PTGS2|TP53|STUB1|PPARGC1A|SIRT1	-7.131
Input ID	GO Biological Processes	19	GO:0042692	muscle cell differentiation	-8.76568	7.46021	9.26016	23250	377	124	15	12.0968	2.92837	274|488|1499|2475|2931|3845|4000|4851|5300|7345|7471|7490|8038|23411|28514	BIN1|ATP2A2|CTNNB1|MTOR|GSK3A|KRAS|LMNA|NOTCH1|PIN1|UCHL1|WNT1|WT1|ADAM12|SIRT1|DLL1	-7.12581
Input ID	KEGG Pathway	24	hsa04657	IL-17 signaling pathway	-8.76508	18.1452	12.1312	23250	93	124	9	7.25806	2.3299	2932|3320|3553|3569|4314|5743|6279|6280|7124	GSK3B|HSP90AA1|IL1B|IL6|MMP3|PTGS2|S100A8|S100A9|TNF	-7.12581
Input ID	GO Biological Processes	19	GO:0010564	regulation of cell cycle process	-8.756	5.15818	8.34105	23250	727	124	20	16.129	3.30293	274|328|351|672|1029|1030|1499|1950|1956|3320|3552|3553|3630|3643|5037|5300|5566|6868|7157|8678	BIN1|APEX1|APP|BRCA1|CDKN2A|CDKN2B|CTNNB1|EGF|EGFR|HSP90AA1|IL1A|IL1B|INS|INSR|PEBP1|PIN1|PRKACA|ADAM17|TP53|BECN1	-7.11765
Input ID	KEGG Pathway	24	hsa05214	Glioma	-8.74565	23.4375	13.1618	23250	64	124	8	6.45161	2.20618	1029|1950|1956|2475|3480|3845|6654|7157	CDKN2A|EGF|EGFR|MTOR|IGF1R|KRAS|SOS1|TP53	-7.10914
Input ID	GO Biological Processes	19	GO:0033273	response to vitamin	-8.72331	17.9521	12.0592	23250	94	124	9	7.25806	2.3299	846|1788|1789|1956|3553|4968|5468|5743|8678	CASR|DNMT3A|DNMT3B|EGFR|IL1B|OGG1|PPARG|PTGS2|BECN1	-7.08863
Input ID	GO Biological Processes	19	GO:1902991	regulation of amyloid precursor protein catabolic process	-8.71915	48.913	16.8339	23250	23	124	6	4.83871	1.92701	274|348|351|2931|5621|54103	BIN1|APOE|APP|GSK3A|PRNP|GSAP	-7.08538
Input ID	GO Biological Processes	19	GO:0048588	developmental cell growth	-8.71097	10.4167	10.1813	23250	216	124	12	9.67742	2.65502	348|351|1499|2475|2931|2932|3320|4137|5071|5300|5802|10013	APOE|APP|CTNNB1|MTOR|GSK3A|GSK3B|HSP90AA1|MAPT|PRKN|PIN1|PTPRS|HDAC6	-7.07812
Input ID	GO Biological Processes	19	GO:0001525	angiogenesis	-8.70839	5.80895	8.59577	23250	581	124	18	14.5161	3.16342	672|1386|1499|1950|3146|3552|3553|3569|4313|4851|5294|5468|5534|5743|8038|10519|23411|28514	BRCA1|ATF2|CTNNB1|EGF|HMGB1|IL1A|IL1B|IL6|MMP2|NOTCH1|PIK3CG|PPARG|PPP3R1|PTGS2|ADAM12|CIB1|SIRT1|DLL1	-7.07644
Input ID	GO Biological Processes	19	GO:1904407	positive regulation of nitric oxide metabolic process	-8.6988	32.0122	14.5532	23250	41	124	7	5.64516	2.07257	2475|3320|3553|3643|5743|7099|7124	MTOR|HSP90AA1|IL1B|INSR|PTGS2|TLR4|TNF	-7.07047
Input ID	Canonical Pathways	11	M159	PID AMB2 NEUTROPHILS PATHWAY	-8.6988	32.0122	14.5532	23250	41	124	7	5.64516	2.07257	177|338|3146|3569|4035|4313|7124	AGER|APOB|HMGB1|IL6|LRP1|MMP2|TNF	-7.07047
Input ID	GO Biological Processes	19	GO:0045429	positive regulation of nitric oxide biosynthetic process	-8.6988	32.0122	14.5532	23250	41	124	7	5.64516	2.07257	2475|3320|3553|3643|5743|7099|7124	MTOR|HSP90AA1|IL1B|INSR|PTGS2|TLR4|TNF	-7.07047
Input ID	GO Biological Processes	19	GO:0019915	lipid storage	-8.69054	23.0769	13.0513	23250	65	124	8	6.45161	2.20618	338|348|3553|3569|5465|5468|7124|23411	APOB|APOE|IL1B|IL6|PPARA|PPARG|TNF|SIRT1	-7.06311
Input ID	GO Biological Processes	19	GO:0051046	regulation of secretion	-8.66478	5.09511	8.26686	23250	736	124	20	16.129	3.30293	151|488|846|1950|1956|3146|3552|3553|3569|3630|4826|4851|5071|6279|6280|6622|7099|7124|7351|23410	ADRA2B|ATP2A2|CASR|EGF|EGFR|HMGB1|IL1A|IL1B|IL6|INS|NNAT|NOTCH1|PRKN|S100A8|S100A9|SNCA|TLR4|TNF|UCP2|SIRT3	-7.04361
Input ID	GO Biological Processes	19	GO:0003012	muscle system process	-8.64954	6.69643	8.91493	23250	448	124	16	12.9032	3.0105	151|274|488|1410|2475|2931|3553|4000|4851|5294|5300|5566|5743|6647|8678|10891	ADRA2B|BIN1|ATP2A2|CRYAB|MTOR|GSK3A|IL1B|LMNA|NOTCH1|PIK3CG|PIN1|PRKACA|PTGS2|SOD1|BECN1|PPARGC1A	-7.02925
Input ID	GO Biological Processes	19	GO:0048167	regulation of synaptic plasticity	-8.63838	11.922	10.5584	23250	173	124	11	8.87097	2.55331	177|348|351|3630|3845|4137|5621|5663|5743|6622|8878	AGER|APOE|APP|INS|KRAS|MAPT|PRNP|PSEN1|PTGS2|SNCA|SQSTM1	-7.02092
Input ID	GO Biological Processes	19	GO:0032459	regulation of protein oligomerization	-8.62153	31.25	14.3679	23250	42	124	7	5.64516	2.07257	348|1410|3416|3630|4314|7157|10013	APOE|CRYAB|IDE|INS|MMP3|TP53|HDAC6	-7.00652
Input ID	GO Biological Processes	19	GO:0044089	positive regulation of cellular component biogenesis	-8.61487	6.15347	8.68578	23250	518	124	17	13.7097	3.08876	274|1499|2099|2475|2932|3320|3416|4137|4314|7099|7124|7157|7471|8678|10013|10273|80823	BIN1|CTNNB1|ESR1|MTOR|GSK3B|HSP90AA1|IDE|MAPT|MMP3|TLR4|TNF|TP53|WNT1|BECN1|HDAC6|STUB1|BHLHB9	-7.00247
Input ID	GO Biological Processes	19	GO:0048638	regulation of developmental growth	-8.59732	8.00305	9.35321	23250	328	124	14	11.2903	2.84202	348|351|2475|2931|2932|3643|4137|4851|5071|5300|5802|6647|7490|28514	APOE|APP|MTOR|GSK3A|GSK3B|INSR|MAPT|NOTCH1|PRKN|PIN1|PTPRS|SOD1|WT1|DLL1	-6.98579
Input ID	GO Biological Processes	19	GO:0001101	response to acid chemical	-8.54665	7.93051	9.29917	23250	331	124	14	11.2903	2.84202	338|1386|1788|1956|2475|3553|4313|4968|5468|5562|5743|7124|7351|10891	APOB|ATF2|DNMT3A|EGFR|MTOR|IL1B|MMP2|OGG1|PPARG|PRKAA1|PTGS2|TNF|UCP2|PPARGC1A	-6.94077
Input ID	Reactome Gene Sets	6	R-HSA-177929	Signaling by EGFR	-8.54628	30.5233	14.189	23250	43	124	7	5.64516	2.07257	102|1950|1956|3845|6654|6868|8038	ADAM10|EGF|EGFR|KRAS|SOS1|ADAM17|ADAM12	-6.94077
Input ID	GO Biological Processes	19	GO:0030308	negative regulation of cell growth	-8.5337	11.6525	10.4172	23250	177	124	11	8.87097	2.55331	1029|1410|2100|2931|3621|5468|5802|7157|7490|23411|57805	CDKN2A|CRYAB|ESR2|GSK3A|ING1|PPARG|PTPRS|TP53|WT1|SIRT1|CCAR2	-6.92904
Input ID	GO Biological Processes	19	GO:0071248	cellular response to metal ion	-8.50793	11.5871	10.3826	23250	178	124	11	8.87097	2.55331	1956|2931|4968|5071|5562|5621|5743|6622|6647|8678|10891	EGFR|GSK3A|OGG1|PRKN|PRKAA1|PRNP|PTGS2|SNCA|SOD1|BECN1|PPARGC1A	-6.90498
Input ID	GO Biological Processes	19	GO:0060070	canonical Wnt signaling pathway	-8.48855	8.76799	9.54101	23250	278	124	13	10.4839	2.75106	348|1499|1950|1956|2931|2932|4851|5071|5300|5663|7471|51527|57805	APOE|CTNNB1|EGF|EGFR|GSK3A|GSK3B|NOTCH1|PRKN|PIN1|PSEN1|WNT1|GSKIP|CCAR2	-6.88814
Input ID	GO Biological Processes	19	GO:0046889	positive regulation of lipid biosynthetic process	-8.47904	21.7391	12.6332	23250	69	124	8	6.45161	2.20618	348|2475|3553|3630|5562|5743|7124|10891	APOE|MTOR|IL1B|INS|PRKAA1|PTGS2|TNF|PPARGC1A	-6.8826
Input ID	GO Biological Processes	19	GO:0051193	regulation of cofactor metabolic process	-8.47904	21.7391	12.6332	23250	69	124	8	6.45161	2.20618	3630|3643|4314|5465|5562|6622|10013|10891	INS|INSR|MMP3|PPARA|PRKAA1|SNCA|HDAC6|PPARGC1A	-6.8826
Input ID	GO Biological Processes	19	GO:0045940	positive regulation of steroid metabolic process	-8.47881	45	16.1179	23250	25	124	6	4.83871	1.92701	341|348|3553|5562|7124|10891	APOC1|APOE|IL1B|PRKAA1|TNF|PPARGC1A	-6.8826
Input ID	Reactome Gene Sets	6	R-HSA-9013507	NOTCH3 Activation and Transmission of Signal to the Nucleus	-8.47881	45	16.1179	23250	25	124	6	4.83871	1.92701	102|1950|1956|5663|5664|28514	ADAM10|EGF|EGFR|PSEN1|PSEN2|DLL1	-6.8826
Input ID	GO Biological Processes	19	GO:0043470	regulation of carbohydrate catabolic process	-8.47294	29.8295	14.0161	23250	44	124	7	5.64516	2.07257	2931|3146|3630|3643|5465|5562|10891	GSK3A|HMGB1|INS|INSR|PPARA|PRKAA1|PPARGC1A	-6.87841
Input ID	GO Biological Processes	19	GO:0033173	calcineurin-NFAT signaling cascade	-8.47294	29.8295	14.0161	23250	44	124	7	5.64516	2.07257	1827|2475|2932|5534|5621|7124|10519	RCAN1|MTOR|GSK3B|PPP3R1|PRNP|TNF|CIB1	-6.87841
Input ID	GO Biological Processes	19	GO:0060828	regulation of canonical Wnt signaling pathway	-8.44526	9.86842	9.85383	23250	228	124	12	9.67742	2.65502	348|1950|1956|2931|2932|4851|5071|5300|5663|7471|51527|57805	APOE|EGF|EGFR|GSK3A|GSK3B|NOTCH1|PRKN|PIN1|PSEN1|WNT1|GSKIP|CCAR2	-6.85487
Input ID	GO Biological Processes	19	GO:0070371	ERK1 and ERK2 cascade	-8.41402	7.74336	9.15835	23250	339	124	14	11.2903	2.84202	177|351|1950|1956|3146|3480|3553|3643|4851|5300|7099|7124|10519|23410	AGER|APP|EGF|EGFR|HMGB1|IGF1R|IL1B|INSR|NOTCH1|PIN1|TLR4|TNF|CIB1|SIRT3	-6.82611
Input ID	GO Biological Processes	19	GO:0006469	negative regulation of protein kinase activity	-8.40249	9.78261	9.80161	23250	230	124	12	9.67742	2.65502	348|1029|1030|3480|3553|5663|6895|7345|10519|11315|23411|51527	APOE|CDKN2A|CDKN2B|IGF1R|IL1B|PSEN1|TARBP2|UCHL1|CIB1|PARK7|SIRT1|GSKIP	-6.8154
Input ID	GO Biological Processes	19	GO:0042542	response to hydrogen peroxide	-8.38466	13.3929	10.7696	23250	140	124	10	8.06452	2.44523	328|1410|3569|5074|5562|6647|8678|10013|11315|23411	APEX1|CRYAB|IL6|PAWR|PRKAA1|SOD1|BECN1|HDAC6|PARK7|SIRT1	-6.7992
Input ID	GO Biological Processes	19	GO:1901983	regulation of protein acetylation	-8.37827	21.1268	12.4371	23250	71	124	8	6.45161	2.20618	672|2932|3553|5562|6622|10891|11315|23411	BRCA1|GSK3B|IL1B|PRKAA1|SNCA|PPARGC1A|PARK7|SIRT1	-6.79363
Input ID	GO Biological Processes	19	GO:0016236	macroautophagy	-8.37697	8.58275	9.41468	23250	284	124	13	10.4839	2.75106	823|2475|4077|5071|5562|5566|5663|7345|8678|8878|9638|10013|23411	CAPN1|MTOR|NBR1|PRKN|PRKAA1|PRKACA|PSEN1|UCHL1|BECN1|SQSTM1|FEZ1|HDAC6|SIRT1	-6.79314
Input ID	GO Biological Processes	19	GO:0072503	cellular divalent inorganic cation homeostasis	-8.3663	6.39659	8.64534	23250	469	124	16	12.9032	3.0105	348|351|488|846|1234|2099|2911|3146|3553|5294|5566|5621|5663|6279|6280|6622	APOE|APP|ATP2A2|CASR|CCR5|ESR1|GRM1|HMGB1|IL1B|PIK3CG|PRKACA|PRNP|PSEN1|S100A8|S100A9|SNCA	-6.78328
Input ID	Canonical Pathways	11	M70	PID PS1 PATHWAY	-8.33165	28.5326	13.687	23250	46	124	7	5.64516	2.07257	102|1499|2932|4851|5663|7471|28514	ADAM10|CTNNB1|GSK3B|NOTCH1|PSEN1|WNT1|DLL1	-6.75267
Input ID	GO Biological Processes	19	GO:0045913	positive regulation of carbohydrate metabolic process	-8.32905	20.8333	12.342	23250	72	124	8	6.45161	2.20618	1950|3146|3630|3643|5465|5562|6622|10891	EGF|HMGB1|INS|INSR|PPARA|PRKAA1|SNCA|PPARGC1A	-6.75087
Input ID	GO Biological Processes	19	GO:0097193	intrinsic apoptotic signaling pathway	-8.32217	8.49303	9.35291	23250	287	124	13	10.4839	2.75106	672|3630|5071|5743|6279|6280|6647|7124|7157|11315|23411|51527|57805	BRCA1|INS|PRKN|PTGS2|S100A8|S100A9|SOD1|TNF|TP53|PARK7|SIRT1|GSKIP|CCAR2	-6.7464
Input ID	GO Biological Processes	19	GO:0001819	positive regulation of cytokine production	-8.31563	6.91032	8.80834	23250	407	124	15	12.0968	2.92837	177|672|1386|1499|3146|3552|3553|3569|3630|5743|6647|6868|7099|7124|11315	AGER|BRCA1|ATF2|CTNNB1|HMGB1|IL1A|IL1B|IL6|INS|PTGS2|SOD1|ADAM17|TLR4|TNF|PARK7	-6.74065
Input ID	GO Biological Processes	19	GO:0019318	hexose metabolic process	-8.29738	9.57447	9.67383	23250	235	124	12	9.67742	2.65502	2475|2931|2932|3146|3630|3643|5071|5465|5562|7124|10891|23411	MTOR|GSK3A|GSK3B|HMGB1|INS|INSR|PRKN|PPARA|PRKAA1|TNF|PPARGC1A|SIRT1	-6.72479
Input ID	GO Biological Processes	19	GO:0051961	negative regulation of nervous system development	-8.26802	8.40517	9.29204	23250	290	124	13	10.4839	2.75106	348|351|1499|2931|2932|3553|4035|4851|5566|5663|5802|10519|28514	APOE|APP|CTNNB1|GSK3A|GSK3B|IL1B|LRP1|NOTCH1|PRKACA|PSEN1|PTPRS|CIB1|DLL1	-6.6978
Input ID	GO Biological Processes	19	GO:0097720	calcineurin-mediated signaling	-8.26353	27.9255	13.5302	23250	47	124	7	5.64516	2.07257	1827|2475|2932|5534|5621|7124|10519	RCAN1|MTOR|GSK3B|PPP3R1|PRNP|TNF|CIB1	-6.6941
Input ID	GO Biological Processes	19	GO:0032770	positive regulation of monooxygenase activity	-8.2595	41.6667	15.4819	23250	27	124	6	4.83871	1.92701	348|3553|3630|3845|7124|11315	APOE|IL1B|INS|KRAS|TNF|PARK7	-6.69193
Input ID	GO Biological Processes	19	GO:0032642	regulation of chemokine production	-8.23281	20.2703	12.1576	23250	74	124	8	6.45161	2.20618	177|3146|3552|3553|3569|6868|7099|7124	AGER|HMGB1|IL1A|IL1B|IL6|ADAM17|TLR4|TNF	-6.67117
Input ID	KEGG Pathway	24	hsa04931	Insulin resistance	-8.22076	15.771	11.2139	23250	107	124	9	7.25806	2.3299	2475|2932|3569|3630|3643|5465|5562|7124|10891	MTOR|GSK3B|IL6|INS|INSR|PPARA|PRKAA1|TNF|PPARGC1A	-6.66067
Input ID	GO Biological Processes	19	GO:0030003	cellular cation homeostasis	-8.21361	5.4	8.16509	23250	625	124	18	14.5161	3.16342	348|351|488|846|1234|2099|2911|3146|3553|5294|5566|5621|5663|6279|6280|6622|6647|9429	APOE|APP|ATP2A2|CASR|CCR5|ESR1|GRM1|HMGB1|IL1B|PIK3CG|PRKACA|PRNP|PSEN1|S100A8|S100A9|SNCA|SOD1|ABCG2	-6.65429
Input ID	Reactome Gene Sets	6	R-HSA-6785807	Interleukin-4 and Interleukin-13 signaling	-8.18491	15.625	11.155	23250	108	124	9	7.25806	2.3299	3320|3552|3553|3569|4313|4314|5743|7124|7157	HSP90AA1|IL1A|IL1B|IL6|MMP2|MMP3|PTGS2|TNF|TP53	-6.62865
Input ID	GO Biological Processes	19	GO:0051384	response to glucocorticoid	-8.1794	12.7551	10.4692	23250	147	124	10	8.06452	2.44523	1789|1956|3146|3553|3569|3845|5037|5743|7124|7352	DNMT3B|EGFR|HMGB1|IL1B|IL6|KRAS|PEBP1|PTGS2|TNF|UCP3	-6.6239
Input ID	GO Biological Processes	19	GO:0002675	positive regulation of acute inflammatory response	-8.15666	40.1786	15.1894	23250	28	124	6	4.83871	1.92701	3553|3569|5294|5743|7124|11315	IL1B|IL6|PIK3CG|PTGS2|TNF|PARK7	-6.60268
Input ID	GO Biological Processes	19	GO:0002683	negative regulation of immune system process	-8.14621	6.71241	8.64026	23250	419	124	15	12.0968	2.92837	1499|3146|3313|3630|4851|5074|5468|5621|5654|5802|6895|7099|7124|10519|28514	CTNNB1|HMGB1|HSPA9|INS|NOTCH1|PAWR|PPARG|PRNP|HTRA1|PTPRS|TARBP2|TLR4|TNF|CIB1|DLL1	-6.59375
Input ID	Reactome Gene Sets	6	R-HSA-9012852	Signaling by NOTCH3	-8.13195	26.7857	13.2308	23250	49	124	7	5.64516	2.07257	102|1950|1956|4851|5663|5664|28514	ADAM10|EGF|EGFR|NOTCH1|PSEN1|PSEN2|DLL1	-6.58251
Input ID	GO Biological Processes	19	GO:0033344	cholesterol efflux	-8.13195	26.7857	13.2308	23250	49	124	7	5.64516	2.07257	338|341|348|1950|4035|9429|23411	APOB|APOC1|APOE|EGF|LRP1|ABCG2|SIRT1	-6.58251
Input ID	GO Biological Processes	19	GO:0051353	positive regulation of oxidoreductase activity	-8.13195	26.7857	13.2308	23250	49	124	7	5.64516	2.07257	348|3553|3630|3845|6622|7124|11315	APOE|IL1B|INS|KRAS|SNCA|TNF|PARK7	-6.58251
Input ID	KEGG Pathway	24	hsa04932	Non-alcoholic fatty liver disease (NAFLD)	-8.12272	12.5839	10.3871	23250	149	124	10	8.06452	2.44523	2931|2932|3552|3553|3569|3630|3643|5465|5562|7124	GSK3A|GSK3B|IL1A|IL1B|IL6|INS|INSR|PPARA|PRKAA1|TNF	-6.57403
Input ID	GO Biological Processes	19	GO:1901342	regulation of vasculature development	-8.11852	6.68052	8.61288	23250	421	124	15	12.0968	2.92837	672|1386|1499|3146|3552|3553|3569|4851|5468|5743|7490|8038|10519|23411|28514	BRCA1|ATF2|CTNNB1|HMGB1|IL1A|IL1B|IL6|NOTCH1|PPARG|PTGS2|WT1|ADAM12|CIB1|SIRT1|DLL1	-6.57058
Input ID	GO Biological Processes	19	GO:0006913	nucleocytoplasmic transport	-8.11287	7.3324	8.8416	23250	358	124	14	11.2903	2.84202	2932|3313|3553|3921|4000|5534|5566|5663|5743|7124|7157|9531|11315|23411	GSK3B|HSPA9|IL1B|RPSA|LMNA|PPP3R1|PRKACA|PSEN1|PTGS2|TNF|TP53|BAG3|PARK7|SIRT1	-6.56567
Input ID	KEGG Pathway	24	hsa05206	MicroRNAs in cancer	-8.1093	8.15217	9.11456	23250	299	124	13	10.4839	2.75106	672|1029|1788|1789|1956|2475|3845|4851|5243|5743|6654|7157|23411	BRCA1|CDKN2A|DNMT3A|DNMT3B|EGFR|MTOR|KRAS|NOTCH1|ABCB1|PTGS2|SOS1|TP53|SIRT1	-6.56285
Input ID	GO Biological Processes	19	GO:0007569	cell aging	-8.0795	15.2027	10.983	23250	111	124	9	7.25806	2.3299	1029|2475|3845|4000|5074|6647|7157|7471|23411	CDKN2A|MTOR|KRAS|LMNA|PAWR|SOD1|TP53|WNT1|SIRT1	-6.54045
Input ID	GO Biological Processes	19	GO:0032368	regulation of lipid transport	-8.0795	15.2027	10.983	23250	111	124	9	7.25806	2.3299	341|348|1950|3553|4035|5071|5465|5468|23411	APOC1|APOE|EGF|IL1B|LRP1|PRKN|PPARA|PPARG|SIRT1	-6.54045
Input ID	GO Biological Processes	19	GO:0006873	cellular ion homeostasis	-8.07534	5.28997	8.04559	23250	638	124	18	14.5161	3.16342	348|351|488|846|1234|2099|2911|3146|3553|5294|5566|5621|5663|6279|6280|6622|6647|9429	APOE|APP|ATP2A2|CASR|CCR5|ESR1|GRM1|HMGB1|IL1B|PIK3CG|PRKACA|PRNP|PSEN1|S100A8|S100A9|SNCA|SOD1|ABCG2	-6.53791
Input ID	Reactome Gene Sets	6	R-HSA-1474244	Extracellular matrix organization	-8.07477	8.09801	9.07613	23250	301	124	13	10.4839	2.75106	102|351|682|823|4313|4314|5654|5663|5802|6868|8038|9644|10753	ADAM10|APP|BSG|CAPN1|MMP2|MMP3|HTRA1|PSEN1|PTPRS|ADAM17|ADAM12|SH3PXD2A|CAPN9	-6.53791
Input ID	GO Biological Processes	19	GO:0001505	regulation of neurotransmitter levels	-8.07477	8.09801	9.07613	23250	301	124	13	10.4839	2.75106	488|2475|3320|3553|3643|5037|5071|5663|5743|6622|7099|7124|11315	ATP2A2|MTOR|HSP90AA1|IL1B|INSR|PEBP1|PRKN|PSEN1|PTGS2|SNCA|TLR4|TNF|PARK7	-6.53791
Input ID	KEGG Pathway	24	hsa05213	Endometrial cancer	-8.06837	26.25	13.0878	23250	50	124	7	5.64516	2.07257	1499|1950|1956|2932|3845|6654|7157	CTNNB1|EGF|EGFR|GSK3B|KRAS|SOS1|TP53	-6.53224
Input ID	KEGG Pathway	24	hsa04150	mTOR signaling pathway	-8.06689	12.4172	10.3066	23250	151	124	10	8.06452	2.44523	2475|2932|3480|3630|3643|3845|5562|6654|7124|7471	MTOR|GSK3B|IGF1R|INS|INSR|KRAS|PRKAA1|SOS1|TNF|WNT1	-6.53149
Input ID	GO Biological Processes	19	GO:0023061	signal release	-8.0636	6.61765	8.55867	23250	425	124	15	12.0968	2.92837	151|488|846|1956|3553|3569|3630|4826|5071|5663|6622|7124|7351|11315|23410	ADRA2B|ATP2A2|CASR|EGFR|IL1B|IL6|INS|NNAT|PRKN|PSEN1|SNCA|TNF|UCP2|PARK7|SIRT3	-6.52893
Input ID	GO Biological Processes	19	GO:0051169	nuclear transport	-8.0518	7.25138	8.77787	23250	362	124	14	11.2903	2.84202	2932|3313|3553|3921|4000|5534|5566|5663|5743|7124|7157|9531|11315|23411	GSK3B|HSPA9|IL1B|RPSA|LMNA|PPP3R1|PRKACA|PSEN1|PTGS2|TNF|TP53|BAG3|PARK7|SIRT1	-6.51858
Input ID	GO Biological Processes	19	GO:0010639	negative regulation of organelle organization	-8.03666	7.2314	8.76209	23250	363	124	14	11.2903	2.84202	672|1789|4000|4137|5071|6622|7515|8678|9531|9638|10013|10519|10891|23411	BRCA1|DNMT3B|LMNA|MAPT|PRKN|SNCA|XRCC1|BECN1|BAG3|FEZ1|HDAC6|CIB1|PPARGC1A|SIRT1	-6.50416
Input ID	GO Biological Processes	19	GO:0044257	cellular protein catabolic process	-8.02856	4.94105	7.87176	23250	721	124	19	15.3226	3.23474	348|1950|2931|2932|3320|3416|4035|5071|5566|5663|7345|7471|8878|10013|10269|10273|11315|23411|57805	APOE|EGF|GSK3A|GSK3B|HSP90AA1|IDE|LRP1|PRKN|PRKACA|PSEN1|UCHL1|WNT1|SQSTM1|HDAC6|ZMPSTE24|STUB1|PARK7|SIRT1|CCAR2	-6.4975
Input ID	GO Biological Processes	19	GO:0001763	morphogenesis of a branching structure	-8.024	10.4167	9.74402	23250	198	124	11	8.87097	2.55331	846|1499|1950|2099|3553|3845|4851|5534|7124|7471|7490	CASR|CTNNB1|EGF|ESR1|IL1B|KRAS|NOTCH1|PPP3R1|TNF|WNT1|WT1	-6.49438
Input ID	Reactome Gene Sets	6	R-HSA-2262752	Cellular responses to stress	-8.0228	6.57126	8.51846	23250	428	124	15	12.0968	2.92837	1029|1030|1410|2475|2932|3313|3320|3552|3569|6647|7157|9531|10013|23411|57805	CDKN2A|CDKN2B|CRYAB|MTOR|GSK3B|HSPA9|HSP90AA1|IL1A|IL6|SOD1|TP53|BAG3|HDAC6|SIRT1|CCAR2	-6.4939
Input ID	GO Biological Processes	19	GO:0046822	regulation of nucleocytoplasmic transport	-8.01094	14.9336	10.8721	23250	113	124	9	7.25806	2.3299	2932|3553|5566|5663|5743|7157|9531|11315|23411	GSK3B|IL1B|PRKACA|PSEN1|PTGS2|TP53|BAG3|PARK7|SIRT1	-6.48348
Input ID	GO Biological Processes	19	GO:0045840	positive regulation of mitotic nuclear division	-8.00616	25.7353	12.9488	23250	51	124	7	5.64516	2.07257	1950|3552|3553|3630|3643|5037|8678	EGF|IL1A|IL1B|INS|INSR|PEBP1|BECN1	-6.47941
Input ID	KEGG Pathway	24	hsa01521	EGFR tyrosine kinase inhibitor resistance	-8.00415	18.9873	11.7266	23250	79	124	8	6.45161	2.20618	1950|1956|2475|2932|3480|3569|3845|6654	EGF|EGFR|MTOR|GSK3B|IGF1R|IL6|KRAS|SOS1	-6.47811
Input ID	GO Biological Processes	19	GO:0002790	peptide secretion	-7.99776	5.59211	8.12813	23250	570	124	17	13.7097	3.08876	846|1956|3146|3552|3553|3569|3630|4826|4851|5071|6279|6280|7099|7124|7351|11315|23410	CASR|EGFR|HMGB1|IL1A|IL1B|IL6|INS|NNAT|NOTCH1|PRKN|S100A8|S100A9|TLR4|TNF|UCP2|PARK7|SIRT3	-6.47455
Input ID	GO Biological Processes	19	GO:0050673	epithelial cell proliferation	-7.99579	6.5407	8.49187	23250	430	124	15	12.0968	2.92837	348|1030|1386|1499|1956|2099|2475|3146|4851|5468|5654|5663|6868|7124|23411	APOE|CDKN2B|ATF2|CTNNB1|EGFR|ESR1|MTOR|HMGB1|NOTCH1|PPARG|HTRA1|PSEN1|ADAM17|TNF|SIRT1	-6.47399
Input ID	GO Biological Processes	19	GO:0005975	carbohydrate metabolic process	-7.98655	5.58231	8.11808	23250	571	124	17	13.7097	3.08876	217|1950|2475|2931|2932|3146|3630|3643|5071|5465|5562|6622|7124|8574|9365|10891|23411	ALDH2|EGF|MTOR|GSK3A|GSK3B|HMGB1|INS|INSR|PRKN|PPARA|PRKAA1|SNCA|TNF|AKR7A2|KL|PPARGC1A|SIRT1	-6.46617
Input ID	GO Biological Processes	19	GO:0030900	forebrain development	-7.96164	7.13315	8.68407	23250	368	124	14	11.2903	2.84202	351|1499|1956|2932|3845|4035|4851|5037|5663|5802|7471|7515|9638|10891	APP|CTNNB1|EGFR|GSK3B|KRAS|LRP1|NOTCH1|PEBP1|PSEN1|PTPRS|WNT1|XRCC1|FEZ1|PPARGC1A	-6.44336
Input ID	GO Biological Processes	19	GO:0048754	branching morphogenesis of an epithelial tube	-7.95762	12.0968	10.15	23250	155	124	10	8.06452	2.44523	846|1499|1950|2099|3845|4851|5534|7124|7471|7490	CASR|CTNNB1|EGF|ESR1|KRAS|NOTCH1|PPP3R1|TNF|WNT1|WT1	-6.44073
Input ID	GO Biological Processes	19	GO:0044283	small molecule biosynthetic process	-7.95161	4.88683	7.80779	23250	729	124	19	15.3226	3.23474	338|341|348|672|1718|1950|3553|3630|3643|4968|5465|5562|5743|6622|6647|7124|10891|11315|23411	APOB|APOC1|APOE|BRCA1|DHCR24|EGF|IL1B|INS|INSR|OGG1|PPARA|PRKAA1|PTGS2|SNCA|SOD1|TNF|PPARGC1A|PARK7|SIRT1	-6.43542
Input ID	Reactome Gene Sets	6	R-HSA-5637810	Constitutive Signaling by EGFRvIII	-7.94128	62.5	17.4467	23250	15	124	5	4.03226	1.76655	1950|1956|3320|3845|6654	EGF|EGFR|HSP90AA1|KRAS|SOS1	-6.42787
Input ID	Reactome Gene Sets	6	R-HSA-5637812	Signaling by EGFRvIII in Cancer	-7.94128	62.5	17.4467	23250	15	124	5	4.03226	1.76655	1950|1956|3320|3845|6654	EGF|EGFR|HSP90AA1|KRAS|SOS1	-6.42787
Input ID	GO Biological Processes	19	GO:0048711	positive regulation of astrocyte differentiation	-7.94128	62.5	17.4467	23250	15	124	5	4.03226	1.76655	177|274|351|3553|4851	AGER|BIN1|APP|IL1B|NOTCH1	-6.42787
Input ID	GO Biological Processes	19	GO:1990000	amyloid fibril formation	-7.94128	62.5	17.4467	23250	15	124	5	4.03226	1.76655	348|351|1410|4137|5663	APOE|APP|CRYAB|MAPT|PSEN1	-6.42787
Input ID	GO Biological Processes	19	GO:0032496	response to lipopolysaccharide	-7.92252	7.8629	8.90748	23250	310	124	13	10.4839	2.75106	338|488|1234|3553|3569|4851|5743|6279|6622|6868|7099|7124|10891	APOB|ATP2A2|CCR5|IL1B|IL6|NOTCH1|PTGS2|S100A8|SNCA|ADAM17|TLR4|TNF|PPARGC1A	-6.41118
Input ID	GO Biological Processes	19	GO:0043500	muscle adaptation	-7.91057	14.5474	10.7108	23250	116	124	9	7.25806	2.3299	488|2475|2931|3553|4000|4851|5300|8678|10891	ATP2A2|MTOR|GSK3A|IL1B|LMNA|NOTCH1|PIN1|BECN1|PPARGC1A	-6.4006
Input ID	KEGG Pathway	24	hsa04010	MAPK signaling pathway	-7.90066	8.82353	9.19854	23250	255	124	12	9.67742	2.65502	1386|1950|1956|3552|3553|3845|4137|5534|5566|6654|7124|7157	ATF2|EGF|EGFR|IL1A|IL1B|KRAS|MAPT|PPP3R1|PRKACA|SOS1|TNF|TP53	-6.39138
Input ID	GO Biological Processes	19	GO:0061061	muscle structure development	-7.88937	5.14482	7.88539	23250	656	124	18	14.5161	3.16342	274|488|1410|1499|2475|2931|3845|4000|4851|5300|5562|7124|7345|7471|7490|8038|23411|28514	BIN1|ATP2A2|CRYAB|CTNNB1|MTOR|GSK3A|KRAS|LMNA|NOTCH1|PIN1|PRKAA1|TNF|UCHL1|WNT1|WT1|ADAM12|SIRT1|DLL1	-6.38262
Input ID	GO Biological Processes	19	GO:0009314	response to radiation	-7.88917	6.42123	8.38718	23250	438	124	15	12.0968	2.92837	351|672|1410|1788|1789|1956|2475|3553|3845|4968|5562|5743|7157|23411|57805	APP|BRCA1|CRYAB|DNMT3A|DNMT3B|EGFR|MTOR|IL1B|KRAS|OGG1|PRKAA1|PTGS2|TP53|SIRT1|CCAR2	-6.38262
Input ID	KEGG Pathway	24	hsa05166	HTLV-I infection	-7.88175	8.78906	9.17615	23250	256	124	12	9.67742	2.65502	1029|1030|1386|1499|2932|3569|3845|5534|5566|7124|7157|7471	CDKN2A|CDKN2B|ATF2|CTNNB1|GSK3B|IL6|KRAS|PPP3R1|PRKACA|TNF|TP53|WNT1	-6.37656
Input ID	GO Biological Processes	19	GO:1900180	regulation of protein localization to nucleus	-7.87775	14.4231	10.6584	23250	117	124	9	7.25806	2.3299	2932|3630|4000|5300|5663|5743|9531|11315|23411	GSK3B|INS|LMNA|PIN1|PSEN1|PTGS2|BAG3|PARK7|SIRT1	-6.37391
Input ID	GO Biological Processes	19	GO:0051101	regulation of DNA binding	-7.87775	14.4231	10.6584	23250	117	124	9	7.25806	2.3299	177|1499|1950|3146|5071|5465|5468|5663|11315	AGER|CTNNB1|EGF|HMGB1|PRKN|PPARA|PPARG|PSEN1|PARK7	-6.37391
Input ID	Reactome Gene Sets	6	R-HSA-2122948	Activated NOTCH1 Transmits Signal to the Nucleus	-7.87133	36.2903	14.3972	23250	31	124	6	4.83871	1.92701	102|4851|5663|5664|6868|28514	ADAM10|NOTCH1|PSEN1|PSEN2|ADAM17|DLL1	-6.36817
Input ID	GO Biological Processes	19	GO:0008202	steroid metabolic process	-7.85647	7.76274	8.83469	23250	314	124	13	10.4839	2.75106	338|341|348|351|1718|2099|3553|5562|6647|7124|10273|10891|23411	APOB|APOC1|APOE|APP|DHCR24|ESR1|IL1B|PRKAA1|SOD1|TNF|STUB1|PPARGC1A|SIRT1	-6.35466
Input ID	GO Biological Processes	19	GO:0055074	calcium ion homeostasis	-7.81069	6.33446	8.31036	23250	444	124	15	12.0968	2.92837	348|351|488|846|1234|2099|2911|3146|3553|5294|5566|5621|5663|6622|9365	APOE|APP|ATP2A2|CASR|CCR5|ESR1|GRM1|HMGB1|IL1B|PIK3CG|PRKACA|PRNP|PSEN1|SNCA|KL	-6.31156
Input ID	GO Biological Processes	19	GO:0060562	epithelial tube morphogenesis	-7.80755	7.68927	8.78094	23250	317	124	13	10.4839	2.75106	846|1499|1950|2099|3845|4851|5534|5566|5663|7124|7471|7490|28514	CASR|CTNNB1|EGF|ESR1|KRAS|NOTCH1|PPP3R1|PRKACA|PSEN1|TNF|WNT1|WT1|DLL1	-6.30915
Input ID	GO Biological Processes	19	GO:0071383	cellular response to steroid hormone stimulus	-7.80695	8.65385	9.08782	23250	260	124	12	9.67742	2.65502	672|1499|1789|1956|2099|2100|5465|5468|10013|10891|11315|23411	BRCA1|CTNNB1|DNMT3B|EGFR|ESR1|ESR2|PPARA|PPARG|HDAC6|PPARGC1A|PARK7|SIRT1	-6.30915
Input ID	GO Biological Processes	19	GO:0045786	negative regulation of cell cycle	-7.79955	5.42092	7.95087	23250	588	124	17	13.7097	3.08876	274|672|1029|1030|1386|1499|1718|1956|2475|4851|5562|5566|5621|5743|7124|7157|57805	BIN1|BRCA1|CDKN2A|CDKN2B|ATF2|CTNNB1|DHCR24|EGFR|MTOR|NOTCH1|PRKAA1|PRKACA|PRNP|PTGS2|TNF|TP53|CCAR2	-6.30309
Input ID	GO Biological Processes	19	GO:0070873	regulation of glycogen metabolic process	-7.78304	35.1562	14.1578	23250	32	124	6	4.83871	1.92701	2475|2931|2932|3146|3630|3643	MTOR|GSK3A|GSK3B|HMGB1|INS|INSR	-6.28725
Input ID	GO Biological Processes	19	GO:0045765	regulation of angiogenesis	-7.77197	6.88976	8.48789	23250	381	124	14	11.2903	2.84202	672|1386|1499|3146|3552|3553|3569|4851|5468|5743|8038|10519|23411|28514	BRCA1|ATF2|CTNNB1|HMGB1|IL1A|IL1B|IL6|NOTCH1|PPARG|PTGS2|ADAM12|CIB1|SIRT1|DLL1	-6.27883
Input ID	GO Biological Processes	19	GO:0010876	lipid localization	-7.77197	6.88976	8.48789	23250	381	124	14	11.2903	2.84202	338|341|348|1950|3553|3569|4035|5071|5243|5465|5468|7124|9429|23411	APOB|APOC1|APOE|EGF|IL1B|IL6|LRP1|PRKN|ABCB1|PPARA|PPARG|TNF|ABCG2|SIRT1	-6.27883
Input ID	GO Biological Processes	19	GO:0050810	regulation of steroid biosynthetic process	-7.74981	17.6471	11.2588	23250	85	124	8	6.45161	2.20618	338|348|3553|5562|6647|7124|10891|23411	APOB|APOE|IL1B|PRKAA1|SOD1|TNF|PPARGC1A|SIRT1	-6.2593
Input ID	GO Biological Processes	19	GO:0070372	regulation of ERK1 and ERK2 cascade	-7.74315	7.59346	8.71036	23250	321	124	13	10.4839	2.75106	177|351|1956|3146|3480|3553|3643|4851|5300|7099|7124|10519|23410	AGER|APP|EGFR|HMGB1|IGF1R|IL1B|INSR|NOTCH1|PIN1|TLR4|TNF|CIB1|SIRT3	-6.25342
Input ID	GO Biological Processes	19	GO:0045444	fat cell differentiation	-7.73776	9.77488	9.37591	23250	211	124	11	8.87097	2.55331	1386|2475|3569|3630|5468|5743|7124|7471|10013|10891|23411	ATF2|MTOR|IL6|INS|PPARG|PTGS2|TNF|WNT1|HDAC6|PPARGC1A|SIRT1	-6.25052
Input ID	GO Biological Processes	19	GO:2001242	regulation of intrinsic apoptotic signaling pathway	-7.72276	11.4329	9.81785	23250	164	124	10	8.06452	2.44523	3630|5071|5743|6279|6280|6647|7157|11315|23411|57805	INS|PRKN|PTGS2|S100A8|S100A9|SOD1|TP53|PARK7|SIRT1|CCAR2	-6.23746
Input ID	GO Biological Processes	19	GO:0048016	inositol phosphate-mediated signaling	-7.71402	23.4375	12.3096	23250	56	124	7	5.64516	2.07257	1827|2475|2932|5534|5621|7124|10519	RCAN1|MTOR|GSK3B|PPP3R1|PRNP|TNF|CIB1	-6.23066
Input ID	GO Biological Processes	19	GO:0030301	cholesterol transport	-7.70933	17.4419	11.1855	23250	86	124	8	6.45161	2.20618	338|341|348|1950|4035|5468|9429|23411	APOB|APOC1|APOE|EGF|LRP1|PPARG|ABCG2|SIRT1	-6.22791
Input ID	Canonical Pathways	11	M275	PID ALPHA SYNUCLEIN PATHWAY	-7.69779	34.0909	13.9292	23250	33	124	6	4.83871	1.92701	5071|5653|6622|7345|10273|11315	PRKN|KLK6|SNCA|UCHL1|STUB1|PARK7	-6.21764
Input ID	GO Biological Processes	19	GO:0043393	regulation of protein binding	-7.69548	9.6831	9.32211	23250	213	124	11	8.87097	2.55331	348|351|2932|4035|5071|5300|5465|5566|5663|10273|11315	APOE|APP|GSK3B|LRP1|PRKN|PIN1|PPARA|PRKACA|PSEN1|STUB1|PARK7	-6.21598
Input ID	GO Biological Processes	19	GO:0045598	regulation of fat cell differentiation	-7.68705	13.7195	10.3568	23250	123	124	9	7.25806	2.3299	2475|3569|3630|5468|5743|7124|7471|10013|23411	MTOR|IL6|INS|PPARG|PTGS2|TNF|WNT1|HDAC6|SIRT1	-6.20883
Input ID	GO Biological Processes	19	GO:0009410	response to xenobiotic stimulus	-7.67911	8.42697	8.93771	23250	267	124	12	9.67742	2.65502	1787|1788|1789|1956|2475|3553|5468|5562|6622|6647|8574|10891	TRDMT1|DNMT3A|DNMT3B|EGFR|MTOR|IL1B|PPARG|PRKAA1|SNCA|SOD1|AKR7A2|PPARGC1A	-6.20215
Input ID	GO Biological Processes	19	GO:0002791	regulation of peptide secretion	-7.66997	6.18132	8.17314	23250	455	124	15	12.0968	2.92837	846|1956|3146|3552|3553|3569|3630|4826|5071|6279|6280|7099|7124|7351|23410	CASR|EGFR|HMGB1|IL1A|IL1B|IL6|INS|NNAT|PRKN|S100A8|S100A9|TLR4|TNF|UCP2|SIRT3	-6.19429
Input ID	GO Biological Processes	19	GO:0045428	regulation of nitric oxide biosynthetic process	-7.65903	23.0263	12.1917	23250	57	124	7	5.64516	2.07257	2475|3320|3553|3643|5743|7099|7124	MTOR|HSP90AA1|IL1B|INSR|PTGS2|TLR4|TNF	-6.18461
Input ID	GO Biological Processes	19	GO:0031669	cellular response to nutrient levels	-7.65364	9.59302	9.26902	23250	215	124	11	8.87097	2.55331	846|1030|2475|5468|5562|5743|6647|7157|7351|8678|23411	CASR|CDKN2B|MTOR|PPARG|PRKAA1|PTGS2|SOD1|TP53|UCP2|BECN1|SIRT1	-6.17986
Input ID	GO Biological Processes	19	GO:0002237	response to molecule of bacterial origin	-7.64824	7.45413	8.60674	23250	327	124	13	10.4839	2.75106	338|488|1234|3553|3569|4851|5743|6279|6622|6868|7099|7124|10891	APOB|ATP2A2|CCR5|IL1B|IL6|NOTCH1|PTGS2|S100A8|SNCA|ADAM17|TLR4|TNF|PPARGC1A	-6.17509
Input ID	GO Biological Processes	19	GO:0006897	endocytosis	-7.64476	4.6752	7.55345	23250	762	124	19	15.3226	3.23474	177|274|338|341|348|351|1950|3146|3320|3553|4035|5294|5468|5663|6622|7124|8678|28514|53353	AGER|BIN1|APOB|APOC1|APOE|APP|EGF|HMGB1|HSP90AA1|IL1B|LRP1|PIK3CG|PPARG|PSEN1|SNCA|TNF|BECN1|DLL1|LRP1B	-6.17223
Input ID	GO Biological Processes	19	GO:0002526	acute inflammatory response	-7.63288	9.54861	9.24273	23250	216	124	11	8.87097	2.55331	3552|3553|3569|3630|4968|5294|5468|5743|6279|7124|11315	IL1A|IL1B|IL6|INS|OGG1|PIK3CG|PPARG|PTGS2|S100A8|TNF|PARK7	-6.16162
Input ID	GO Biological Processes	19	GO:0045665	negative regulation of neuron differentiation	-7.63288	9.54861	9.24273	23250	216	124	11	8.87097	2.55331	348|351|2931|2932|3553|4035|4851|5663|5802|10519|28514	APOE|APP|GSK3A|GSK3B|IL1B|LRP1|NOTCH1|PSEN1|PTPRS|CIB1|DLL1	-6.16162
Input ID	GO Biological Processes	19	GO:0032092	positive regulation of protein binding	-7.62991	17.0455	11.0425	23250	88	124	8	6.45161	2.20618	348|351|2932|4035|5071|5300|5663|11315	APOE|APP|GSK3B|LRP1|PRKN|PIN1|PSEN1|PARK7	-6.15927
Input ID	GO Biological Processes	19	GO:0051047	positive regulation of secretion	-7.61724	6.69643	8.32893	23250	392	124	14	11.2903	2.84202	846|1956|3146|3552|3553|3569|3630|4826|6279|6280|6622|7099|7124|23410	CASR|EGFR|HMGB1|IL1A|IL1B|IL6|INS|NNAT|S100A8|S100A9|SNCA|TLR4|TNF|SIRT3	-6.14722
Input ID	GO Biological Processes	19	GO:0032885	regulation of polysaccharide biosynthetic process	-7.61536	33.0882	13.7105	23250	34	124	6	4.83871	1.92701	1950|2475|2931|2932|3630|3643	EGF|MTOR|GSK3A|GSK3B|INS|INSR	-6.14659
Input ID	GO Biological Processes	19	GO:0050768	negative regulation of neurogenesis	-7.60775	8.30258	8.85438	23250	271	124	12	9.67742	2.65502	348|351|1499|2931|2932|3553|4035|4851|5663|5802|10519|28514	APOE|APP|CTNNB1|GSK3A|GSK3B|IL1B|LRP1|NOTCH1|PSEN1|PTPRS|CIB1|DLL1	-6.14128
Input ID	Reactome Gene Sets	6	R-HSA-2894862	Constitutive Signaling by NOTCH1 HD+PEST Domain Mutants	-7.60508	22.6293	12.0768	23250	58	124	7	5.64516	2.07257	102|4851|5663|5664|6868|10013|28514	ADAM10|NOTCH1|PSEN1|PSEN2|ADAM17|HDAC6|DLL1	-6.14128
Input ID	Canonical Pathways	11	M100	PID SHP2 PATHWAY	-7.60508	22.6293	12.0768	23250	58	124	7	5.64516	2.07257	1950|1956|3480|3569|3845|5566|6654	EGF|EGFR|IGF1R|IL6|KRAS|PRKACA|SOS1	-6.14128
Input ID	Reactome Gene Sets	6	R-HSA-2644606	Constitutive Signaling by NOTCH1 PEST Domain Mutants	-7.60508	22.6293	12.0768	23250	58	124	7	5.64516	2.07257	102|4851|5663|5664|6868|10013|28514	ADAM10|NOTCH1|PSEN1|PSEN2|ADAM17|HDAC6|DLL1	-6.14128
Input ID	Reactome Gene Sets	6	R-HSA-2644602	Signaling by NOTCH1 PEST Domain Mutants in Cancer	-7.60508	22.6293	12.0768	23250	58	124	7	5.64516	2.07257	102|4851|5663|5664|6868|10013|28514	ADAM10|NOTCH1|PSEN1|PSEN2|ADAM17|HDAC6|DLL1	-6.14128
Input ID	Reactome Gene Sets	6	R-HSA-2644603	Signaling by NOTCH1 in Cancer	-7.60508	22.6293	12.0768	23250	58	124	7	5.64516	2.07257	102|4851|5663|5664|6868|10013|28514	ADAM10|NOTCH1|PSEN1|PSEN2|ADAM17|HDAC6|DLL1	-6.14128
Input ID	Reactome Gene Sets	6	R-HSA-2894858	Signaling by NOTCH1 HD+PEST Domain Mutants in Cancer	-7.60508	22.6293	12.0768	23250	58	124	7	5.64516	2.07257	102|4851|5663|5664|6868|10013|28514	ADAM10|NOTCH1|PSEN1|PSEN2|ADAM17|HDAC6|DLL1	-6.14128
Input ID	GO Biological Processes	19	GO:0006091	generation of precursor metabolites and energy	-7.59489	6.10087	8.10018	23250	461	124	15	12.0968	2.92837	217|2475|2931|2932|3146|3630|3643|5465|5562|6622|8574|9365|10891|11315|23410	ALDH2|MTOR|GSK3A|GSK3B|HMGB1|INS|INSR|PPARA|PRKAA1|SNCA|AKR7A2|KL|PPARGC1A|PARK7|SIRT3	-6.13232
Input ID	Reactome Gene Sets	6	R-HSA-2660826	Constitutive Signaling by NOTCH1 t(7;9)(NOTCH1:M1580_K2555) Translocation Mutant	-7.57443	107.143	20.5663	23250	7	124	4	3.22581	1.58668	102|4851|6868|28514	ADAM10|NOTCH1|ADAM17|DLL1	-6.11615
Input ID	Reactome Gene Sets	6	R-HSA-2660825	Signaling by NOTCH1 t(7;9)(NOTCH1:M1580_K2555) Translocation Mutant	-7.57443	107.143	20.5663	23250	7	124	4	3.22581	1.58668	102|4851|6868|28514	ADAM10|NOTCH1|ADAM17|DLL1	-6.11615
Input ID	Reactome Gene Sets	6	R-HSA-179812	GRB2 events in EGFR signaling	-7.57443	107.143	20.5663	23250	7	124	4	3.22581	1.58668	1950|1956|3845|6654	EGF|EGFR|KRAS|SOS1	-6.11615
Input ID	GO Biological Processes	19	GO:0090647	modulation of age-related behavioral decline	-7.57443	107.143	20.5663	23250	7	124	4	3.22581	1.58668	177|351|5621|5663	AGER|APP|PRNP|PSEN1	-6.11615
Input ID	GO Biological Processes	19	GO:0008286	insulin receptor signaling pathway	-7.56551	13.2874	10.1672	23250	127	124	9	7.25806	2.3299	2931|3416|3480|3553|3630|3643|6654|9365|23411	GSK3A|IDE|IGF1R|IL1B|INS|INSR|SOS1|KL|SIRT1	-6.10905
Input ID	Canonical Pathways	11	M166	PID ATF2 PATHWAY	-7.55215	22.2458	11.9647	23250	59	124	7	5.64516	2.07257	672|1386|2099|3569|3630|4313|10891	BRCA1|ATF2|ESR1|IL6|INS|MMP2|PPARGC1A	-6.09629
Input ID	GO Biological Processes	19	GO:0097191	extrinsic apoptotic signaling pathway	-7.55092	9.375	9.13928	23250	220	124	11	8.87097	2.55331	672|2537|2931|2932|3552|3553|4000|7124|9531|10519|11315	BRCA1|IFI6|GSK3A|GSK3B|IL1A|IL1B|LMNA|TNF|BAG3|CIB1|PARK7	-6.09567
Input ID	GO Biological Processes	19	GO:0002931	response to ischemia	-7.53558	32.1429	13.5012	23250	35	124	6	4.83871	1.92701	846|7345|8878|10273|10519|10891	CASR|UCHL1|SQSTM1|STUB1|CIB1|PPARGC1A	-6.08214
Input ID	GO Biological Processes	19	GO:0045787	positive regulation of cell cycle	-7.53494	6.59548	8.24478	23250	398	124	14	11.2903	2.84202	328|351|672|1950|1956|3552|3553|3630|3643|5037|5566|6868|7157|8678	APEX1|APP|BRCA1|EGF|EGFR|IL1A|IL1B|INS|INSR|PEBP1|PRKACA|ADAM17|TP53|BECN1	-6.08211
Input ID	GO Biological Processes	19	GO:0060560	developmental growth involved in morphogenesis	-7.53069	9.33258	9.11383	23250	221	124	11	8.87097	2.55331	348|351|1499|2099|2932|3320|4137|4851|5071|5802|10013	APOE|APP|CTNNB1|ESR1|GSK3B|HSP90AA1|MAPT|NOTCH1|PRKN|PTPRS|HDAC6	-6.07905
Input ID	GO Biological Processes	19	GO:0030099	myeloid cell differentiation	-7.50783	6.5625	8.21712	23250	400	124	14	11.2903	2.84202	351|1030|1499|2475|3146|3313|5468|5663|7099|7124|9644|10519|23411|28514	APP|CDKN2B|CTNNB1|MTOR|HMGB1|HSPA9|PPARG|PSEN1|TLR4|TNF|SH3PXD2A|CIB1|SIRT1|DLL1	-6.05978
Input ID	GO Biological Processes	19	GO:0014015	positive regulation of gliogenesis	-7.50018	21.875	11.8554	23250	60	124	7	5.64516	2.07257	177|274|351|2475|3553|4851|5468	AGER|BIN1|APP|MTOR|IL1B|NOTCH1|PPARG	-6.05273
Input ID	GO Biological Processes	19	GO:0005996	monosaccharide metabolic process	-7.48569	8.09353	8.7126	23250	278	124	12	9.67742	2.65502	2475|2931|2932|3146|3630|3643|5071|5465|5562|7124|10891|23411	MTOR|GSK3A|GSK3B|HMGB1|INS|INSR|PRKN|PPARA|PRKAA1|TNF|PPARGC1A|SIRT1	-6.03943
Input ID	GO Biological Processes	19	GO:0048729	tissue morphogenesis	-7.47466	5.14943	7.66205	23250	619	124	17	13.7097	3.08876	846|1499|1950|1956|2099|2475|3845|4851|5534|5566|5663|6654|6868|7124|7471|7490|28514	CASR|CTNNB1|EGF|EGFR|ESR1|MTOR|KRAS|NOTCH1|PPP3R1|PRKACA|PSEN1|SOS1|ADAM17|TNF|WNT1|WT1|DLL1	-6.02898
Input ID	GO Biological Processes	19	GO:0090068	positive regulation of cell cycle process	-7.46854	8.06452	8.69275	23250	279	124	12	9.67742	2.65502	328|351|672|1950|3552|3553|3630|3643|5037|5566|7157|8678	APEX1|APP|BRCA1|EGF|IL1A|IL1B|INS|INSR|PEBP1|PRKACA|TP53|BECN1	-6.02346
Input ID	GO Biological Processes	19	GO:0006066	alcohol metabolic process	-7.46429	7.19027	8.40717	23250	339	124	13	10.4839	2.75106	217|338|341|348|351|1718|3553|5562|6622|6647|7124|8574|11315	ALDH2|APOB|APOC1|APOE|APP|DHCR24|IL1B|PRKAA1|SNCA|SOD1|TNF|AKR7A2|PARK7	-6.01979
Input ID	GO Biological Processes	19	GO:0050900	leukocyte migration	-7.46017	5.95869	7.96971	23250	472	124	15	12.0968	2.92837	102|338|351|682|1234|3146|3552|3553|3569|5294|6279|6280|6654|6868|7124	ADAM10|APOB|APP|BSG|CCR5|HMGB1|IL1A|IL1B|IL6|PIK3CG|S100A8|S100A9|SOS1|ADAM17|TNF	-6.01673
Input ID	GO Biological Processes	19	GO:0070884	regulation of calcineurin-NFAT signaling cascade	-7.45829	31.25	13.3004	23250	36	124	6	4.83871	1.92701	1827|2475|2932|5621|7124|10519	RCAN1|MTOR|GSK3B|PRNP|TNF|CIB1	-6.01673
Input ID	GO Biological Processes	19	GO:0106056	regulation of calcineurin-mediated signaling	-7.45829	31.25	13.3004	23250	36	124	6	4.83871	1.92701	1827|2475|2932|5621|7124|10519	RCAN1|MTOR|GSK3B|PRNP|TNF|CIB1	-6.01673
Input ID	GO Biological Processes	19	GO:1900271	regulation of long-term synaptic potentiation	-7.45829	31.25	13.3004	23250	36	124	6	4.83871	1.92701	177|348|351|3630|5621|8878	AGER|APOE|APP|INS|PRNP|SQSTM1	-6.01673
Input ID	GO Biological Processes	19	GO:0015918	sterol transport	-7.43968	16.129	10.7047	23250	93	124	8	6.45161	2.20618	338|341|348|1950|4035|5468|9429|23411	APOB|APOC1|APOE|EGF|LRP1|PPARG|ABCG2|SIRT1	-5.99899
Input ID	Reactome Gene Sets	6	R-HSA-2219528	PI3K/AKT Signaling in Cancer	-7.40297	15.9574	10.6403	23250	94	124	8	6.45161	2.20618	1950|1956|2099|2100|2475|2931|2932|9365	EGF|EGFR|ESR1|ESR2|MTOR|GSK3A|GSK3B|KL	-5.96608
Input ID	GO Biological Processes	19	GO:0070301	cellular response to hydrogen peroxide	-7.40297	15.9574	10.6403	23250	94	124	8	6.45161	2.20618	328|3569|5074|5562|8678|10013|11315|23411	APEX1|IL6|PAWR|PRKAA1|BECN1|HDAC6|PARK7|SIRT1	-5.96608
Input ID	GO Biological Processes	19	GO:0046683	response to organophosphorus	-7.39089	12.688	9.89833	23250	133	124	9	7.25806	2.3299	328|351|682|3553|5037|5294|5743|6647|7490	APEX1|APP|BSG|IL1B|PEBP1|PIK3CG|PTGS2|SOD1|WT1	-5.95574
Input ID	GO Biological Processes	19	GO:0010677	negative regulation of cellular carbohydrate metabolic process	-7.38334	30.4054	13.1077	23250	37	124	6	4.83871	1.92701	2931|2932|3630|5071|5465|10891	GSK3A|GSK3B|INS|PRKN|PPARA|PPARGC1A	-5.94934
Input ID	GO Biological Processes	19	GO:0018205	peptidyl-lysine modification	-7.37509	7.06522	8.311	23250	345	124	13	10.4839	2.75106	672|1386|1499|1789|3553|4826|5562|6622|10013|10891|11315|23410|23411	BRCA1|ATF2|CTNNB1|DNMT3B|IL1B|NNAT|PRKAA1|SNCA|HDAC6|PPARGC1A|PARK7|SIRT3|SIRT1	-5.94167
Input ID	Reactome Gene Sets	6	R-HSA-5637815	Signaling by Ligand-Responsive EGFR Variants in Cancer	-7.36075	49.3421	15.4359	23250	19	124	5	4.03226	1.76655	1950|1956|3320|3845|6654	EGF|EGFR|HSP90AA1|KRAS|SOS1	-5.93304
Input ID	GO Biological Processes	19	GO:0090343	positive regulation of cell aging	-7.36075	49.3421	15.4359	23250	19	124	5	4.03226	1.76655	1029|3845|4000|5074|23411	CDKN2A|KRAS|LMNA|PAWR|SIRT1	-5.93304
Input ID	Reactome Gene Sets	6	R-HSA-1236382	Constitutive Signaling by Ligand-Responsive EGFR Cancer Variants	-7.36075	49.3421	15.4359	23250	19	124	5	4.03226	1.76655	1950|1956|3320|3845|6654	EGF|EGFR|HSP90AA1|KRAS|SOS1	-5.93304
Input ID	Reactome Gene Sets	6	R-HSA-1643713	Signaling by EGFR in Cancer	-7.36075	49.3421	15.4359	23250	19	124	5	4.03226	1.76655	1950|1956|3320|3845|6654	EGF|EGFR|HSP90AA1|KRAS|SOS1	-5.93304
Input ID	GO Biological Processes	19	GO:0097242	amyloid-beta clearance	-7.36075	49.3421	15.4359	23250	19	124	5	4.03226	1.76655	348|3416|3480|3643|4035	APOE|IDE|IGF1R|INSR|LRP1	-5.93304
Input ID	GO Biological Processes	19	GO:0097062	dendritic spine maintenance	-7.36075	49.3421	15.4359	23250	19	124	5	4.03226	1.76655	348|3480|3630|3643|5621	APOE|IGF1R|INS|INSR|PRNP	-5.93304
Input ID	Reactome Gene Sets	6	R-HSA-5686938	Regulation of TLR by endogenous ligand	-7.36075	49.3421	15.4359	23250	19	124	5	4.03226	1.76655	338|3146|6279|6280|7099	APOB|HMGB1|S100A8|S100A9|TLR4	-5.93304
Input ID	GO Biological Processes	19	GO:0030258	lipid modification	-7.31726	7.8125	8.51845	23250	288	124	12	9.67742	2.65502	341|348|1950|1956|2099|2475|5294|5465|5468|5562|9365|10891	APOC1|APOE|EGF|EGFR|ESR1|MTOR|PIK3CG|PPARA|PPARG|PRKAA1|KL|PPARGC1A	-5.89182
Input ID	Reactome Gene Sets	6	R-HSA-3108232	SUMO E3 ligases SUMOylate target proteins	-7.31578	10.3591	9.25598	23250	181	124	10	8.06452	2.44523	672|1029|1788|1789|2099|5465|5468|7157|10891|11315	BRCA1|CDKN2A|DNMT3A|DNMT3B|ESR1|PPARA|PPARG|TP53|PPARGC1A|PARK7	-5.8909
Input ID	GO Biological Processes	19	GO:0051785	positive regulation of nuclear division	-7.30142	20.5078	11.4432	23250	64	124	7	5.64516	2.07257	1950|3552|3553|3630|3643|5037|8678	EGF|IL1A|IL1B|INS|INSR|PEBP1|BECN1	-5.8771
Input ID	GO Biological Processes	19	GO:0097305	response to alcohol	-7.27668	8.8141	8.797	23250	234	124	11	8.87097	2.55331	672|1234|1499|1788|3553|4968|5037|5468|5562|6279|6647	BRCA1|CCR5|CTNNB1|DNMT3A|IL1B|OGG1|PEBP1|PPARG|PRKAA1|S100A8|SOD1	-5.85405
Input ID	Reactome Gene Sets	6	R-HSA-180336	SHC1 events in EGFR signaling	-7.2752	93.75	19.2125	23250	8	124	4	3.22581	1.58668	1950|1956|3845|6654	EGF|EGFR|KRAS|SOS1	-5.85369
Input ID	GO Biological Processes	19	GO:1905906	regulation of amyloid fibril formation	-7.2752	93.75	19.2125	23250	8	124	4	3.22581	1.58668	348|351|1410|5663	APOE|APP|CRYAB|PSEN1	-5.85369
Input ID	GO Biological Processes	19	GO:0007507	heart development	-7.26967	5.33808	7.62307	23250	562	124	16	12.9032	3.0105	1386|1499|1956|2475|2931|3643|4000|4851|5300|5465|5468|5534|5663|6654|7490|28514	ATF2|CTNNB1|EGFR|MTOR|GSK3A|INSR|LMNA|NOTCH1|PIN1|PPARA|PPARG|PPP3R1|PSEN1|SOS1|WT1|DLL1	-5.84872
Input ID	GO Biological Processes	19	GO:0050848	regulation of calcium-mediated signaling	-7.26033	15.3061	10.3921	23250	98	124	8	6.45161	2.20618	1827|2475|2932|4137|5566|5621|7124|10519	RCAN1|MTOR|GSK3B|MAPT|PRKACA|PRNP|TNF|CIB1	-5.84105
Input ID	Reactome Gene Sets	6	R-HSA-157118	Signaling by NOTCH	-7.25781	8.7766	8.77366	23250	235	124	11	8.87097	2.55331	102|488|1950|1956|4851|5663|5664|6868|7157|10013|28514	ADAM10|ATP2A2|EGF|EGFR|NOTCH1|PSEN1|PSEN2|ADAM17|TP53|HDAC6|DLL1	-5.83909
Input ID	KEGG Pathway	24	hsa04910	Insulin signaling pathway	-7.25188	12.2283	9.68715	23250	138	124	9	7.25806	2.3299	2475|2932|3630|3643|3845|5562|5566|6654|10891	MTOR|GSK3B|INS|INSR|KRAS|PRKAA1|PRKACA|SOS1|PPARGC1A	-5.83427
Input ID	GO Biological Processes	19	GO:0061138	morphogenesis of a branching epithelium	-7.2262	10.1351	9.13454	23250	185	124	10	8.06452	2.44523	846|1499|1950|2099|3845|4851|5534|7124|7471|7490	CASR|CTNNB1|EGF|ESR1|KRAS|NOTCH1|PPP3R1|TNF|WNT1|WT1	-5.81135
Input ID	GO Biological Processes	19	GO:1903364	positive regulation of cellular protein catabolic process	-7.22475	12.1403	9.64622	23250	139	124	9	7.25806	2.3299	348|1950|2931|2932|3320|4035|5071|5663|10273	APOE|EGF|GSK3A|GSK3B|HSP90AA1|LRP1|PRKN|PSEN1|STUB1	-5.811
Input ID	GO Biological Processes	19	GO:0046824	positive regulation of nucleocytoplasmic transport	-7.20707	19.8864	11.2509	23250	66	124	7	5.64516	2.07257	2932|3553|5566|5663|5743|7157|9531	GSK3B|IL1B|PRKACA|PSEN1|PTGS2|TP53|BAG3	-5.79551
Input ID	Reactome Gene Sets	6	R-HSA-1474228	Degradation of the extracellular matrix	-7.19783	12.0536	9.60571	23250	140	124	9	7.25806	2.3299	102|682|823|4313|4314|5654|5663|6868|10753	ADAM10|BSG|CAPN1|MMP2|MMP3|HTRA1|PSEN1|ADAM17|CAPN9	-5.78774
Input ID	GO Biological Processes	19	GO:0120035	regulation of plasma membrane bounded cell projection organization	-7.19765	4.92658	7.41732	23250	647	124	17	13.7097	3.08876	348|2475|2931|2932|3630|4035|4137|5071|5621|5653|5663|5802|6280|7471|9638|10519|80823	APOE|MTOR|GSK3A|GSK3B|INS|LRP1|MAPT|PRKN|PRNP|KLK6|PSEN1|PTPRS|S100A9|WNT1|FEZ1|CIB1|BHLHB9	-5.78774
Input ID	Reactome Gene Sets	6	R-HSA-2990846	SUMOylation	-7.18221	10.0267	9.07521	23250	187	124	10	8.06452	2.44523	672|1029|1788|1789|2099|5465|5468|7157|10891|11315	BRCA1|CDKN2A|DNMT3A|DNMT3B|ESR1|PPARA|PPARG|TP53|PPARGC1A|PARK7	-5.77393
Input ID	GO Biological Processes	19	GO:0046825	regulation of protein export from nucleus	-7.17124	28.125	12.5726	23250	40	124	6	4.83871	1.92701	2932|3553|5566|7157|9531|11315	GSK3B|IL1B|PRKACA|TP53|BAG3|PARK7	-5.76513
Input ID	GO Biological Processes	19	GO:0045912	negative regulation of carbohydrate metabolic process	-7.17124	28.125	12.5726	23250	40	124	6	4.83871	1.92701	2931|2932|3630|5071|5465|10891	GSK3A|GSK3B|INS|PRKN|PPARA|PPARGC1A	-5.76513
Input ID	GO Biological Processes	19	GO:0046688	response to copper ion	-7.17124	28.125	12.5726	23250	40	124	6	4.83871	1.92701	3552|5621|6622|6647|8678|11315	IL1A|PRNP|SNCA|SOD1|BECN1|PARK7	-5.76513
Input ID	GO Biological Processes	19	GO:0050714	positive regulation of protein secretion	-7.16476	8.59375	8.65897	23250	240	124	11	8.87097	2.55331	846|1956|3146|3552|3553|3569|3630|4826|7099|7124|23410	CASR|EGFR|HMGB1|IL1A|IL1B|IL6|INS|NNAT|TLR4|TNF|SIRT3	-5.75918
Input ID	KEGG Pathway	24	hsa04066	HIF-1 signaling pathway	-7.15747	14.8515	10.2154	23250	101	124	8	6.45161	2.20618	1950|1956|2475|3480|3569|3630|3643|7099	EGF|EGFR|MTOR|IGF1R|IL6|INS|INSR|TLR4	-5.75243
Input ID	GO Biological Processes	19	GO:0006839	mitochondrial transport	-7.14641	8.55809	8.63643	23250	241	124	11	8.87097	2.55331	1386|2931|2932|3320|5071|5562|5663|7157|7351|7352|9531	ATF2|GSK3A|GSK3B|HSP90AA1|PRKN|PRKAA1|PSEN1|TP53|UCP2|UCP3|BAG3	-5.74191
Input ID	KEGG Pathway	24	hsa05418	Fluid shear stress and atherosclerosis	-7.14462	11.8838	9.52591	23250	142	124	9	7.25806	2.3299	1499|3320|3552|3553|4313|5562|7124|7157|8878	CTNNB1|HSP90AA1|IL1A|IL1B|MMP2|PRKAA1|TNF|TP53|SQSTM1	-5.74066
Input ID	GO Biological Processes	19	GO:0046827	positive regulation of protein export from nucleus	-7.12142	44.6429	14.6511	23250	21	124	5	4.03226	1.76655	2932|3553|5566|7157|9531	GSK3B|IL1B|PRKACA|TP53|BAG3	-5.71907
Input ID	GO Biological Processes	19	GO:0007565	female pregnancy	-7.1172	9.86842	8.98786	23250	190	124	10	8.06452	2.44523	151|682|2099|2475|3553|3845|4313|5743|6647|7351	ADRA2B|BSG|ESR1|MTOR|IL1B|KRAS|MMP2|PTGS2|SOD1|UCP2	-5.71699
Input ID	GO Biological Processes	19	GO:0006473	protein acetylation	-7.1172	9.86842	8.98786	23250	190	124	10	8.06452	2.44523	672|1386|2932|3553|4137|5562|6622|10891|11315|23411	BRCA1|ATF2|GSK3B|IL1B|MAPT|PRKAA1|SNCA|PPARGC1A|PARK7|SIRT1	-5.71699
Input ID	GO Biological Processes	19	GO:0006809	nitric oxide biosynthetic process	-7.11579	19.3015	11.0669	23250	68	124	7	5.64516	2.07257	2475|3320|3553|3643|5743|7099|7124	MTOR|HSP90AA1|IL1B|INSR|PTGS2|TLR4|TNF	-5.71664
Input ID	GO Biological Processes	19	GO:1901224	positive regulation of NIK/NF-kappaB signaling	-7.11579	19.3015	11.0669	23250	68	124	7	5.64516	2.07257	177|351|1956|3146|3553|7099|7124	AGER|APP|EGFR|HMGB1|IL1B|TLR4|TNF	-5.71664
Input ID	GO Biological Processes	19	GO:1901615	organic hydroxy compound metabolic process	-7.11085	5.60259	7.63388	23250	502	124	15	12.0968	2.92837	217|338|341|348|351|1718|3553|5071|5562|6622|6647|7124|8574|11315|23411	ALDH2|APOB|APOC1|APOE|APP|DHCR24|IL1B|PRKN|PRKAA1|SNCA|SOD1|TNF|AKR7A2|PARK7|SIRT1	-5.71223
Input ID	GO Biological Processes	19	GO:0007050	cell cycle arrest	-7.10998	8.48765	8.59175	23250	243	124	11	8.87097	2.55331	274|672|1029|1030|1718|2475|4851|5562|5566|5621|7157	BIN1|BRCA1|CDKN2A|CDKN2B|DHCR24|MTOR|NOTCH1|PRKAA1|PRKACA|PRNP|TP53	-5.71189
Input ID	KEGG Pathway	24	hsa05219	Bladder cancer	-7.10442	27.439	12.4071	23250	41	124	6	4.83871	1.92701	1029|1950|1956|3845|4313|7157	CDKN2A|EGF|EGFR|KRAS|MMP2|TP53	-5.70845
Input ID	Canonical Pathways	11	M41	PID ER NONGENOMIC PATHWAY	-7.10442	27.439	12.4071	23250	41	124	6	4.83871	1.92701	2099|2100|3480|3845|4313|6654	ESR1|ESR2|IGF1R|KRAS|MMP2|SOS1	-5.70845
Input ID	GO Biological Processes	19	GO:0031344	regulation of cell projection organization	-7.10223	4.8516	7.3333	23250	657	124	17	13.7097	3.08876	348|2475|2931|2932|3630|4035|4137|5071|5621|5653|5663|5802|6280|7471|9638|10519|80823	APOE|MTOR|GSK3A|GSK3B|INS|LRP1|MAPT|PRKN|PRNP|KLK6|PSEN1|PTPRS|S100A9|WNT1|FEZ1|CIB1|BHLHB9	-5.70679
Input ID	GO Biological Processes	19	GO:0030072	peptide hormone secretion	-7.09189	8.45287	8.5696	23250	244	124	11	8.87097	2.55331	846|1956|3553|3569|3630|4826|5071|7124|7351|11315|23410	CASR|EGFR|IL1B|IL6|INS|NNAT|PRKN|TNF|UCP2|PARK7|SIRT3	-5.69802
Input ID	GO Biological Processes	19	GO:0031668	cellular response to extracellular stimulus	-7.09189	8.45287	8.5696	23250	244	124	11	8.87097	2.55331	846|1030|2475|5468|5562|5743|6647|7157|7351|8678|23411	CASR|CDKN2B|MTOR|PPARG|PRKAA1|PTGS2|SOD1|TP53|UCP2|BECN1|SIRT1	-5.69802
Input ID	GO Biological Processes	19	GO:0043502	regulation of muscle adaptation	-7.09073	14.5631	10.1017	23250	103	124	8	6.45161	2.20618	488|2475|2931|4000|4851|5300|8678|10891	ATP2A2|MTOR|GSK3A|LMNA|NOTCH1|PIN1|BECN1|PPARGC1A	-5.69739
Input ID	GO Biological Processes	19	GO:0048732	gland development	-7.08207	6.06236	7.78628	23250	433	124	14	11.2903	2.84202	823|1499|1950|1956|2099|3643|3845|4851|5663|6647|7124|7351|7471|7490	CAPN1|CTNNB1|EGF|EGFR|ESR1|INSR|KRAS|NOTCH1|PSEN1|SOD1|TNF|UCP2|WNT1|WT1	-5.68925
Input ID	GO Biological Processes	19	GO:1903578	regulation of ATP metabolic process	-7.07125	19.0217	10.9779	23250	69	124	7	5.64516	2.07257	3630|3643|5465|5562|6622|10891|11315	INS|INSR|PPARA|PRKAA1|SNCA|PPARGC1A|PARK7	-5.67895
Input ID	GO Biological Processes	19	GO:0006874	cellular calcium ion homeostasis	-7.06977	6.04839	7.77393	23250	434	124	14	11.2903	2.84202	348|351|488|846|1234|2099|2911|3146|3553|5294|5566|5621|5663|6622	APOE|APP|ATP2A2|CASR|CCR5|ESR1|GRM1|HMGB1|IL1B|PIK3CG|PRKACA|PRNP|PSEN1|SNCA	-5.67799
Input ID	GO Biological Processes	19	GO:0043279	response to alkaloid	-7.0579	14.4231	10.046	23250	104	124	8	6.45161	2.20618	1788|1789|2475|3553|5468|5562|6622|10891	DNMT3A|DNMT3B|MTOR|IL1B|PPARG|PRKAA1|SNCA|PPARGC1A	-5.66769
Input ID	GO Biological Processes	19	GO:0043401	steroid hormone mediated signaling pathway	-7.05334	9.71503	8.90243	23250	193	124	10	8.06452	2.44523	672|1499|2099|2100|5465|5468|10013|10891|11315|23411	BRCA1|CTNNB1|ESR1|ESR2|PPARA|PPARG|HDAC6|PPARGC1A|PARK7|SIRT1	-5.66417
Input ID	GO Biological Processes	19	GO:0007219	Notch signaling pathway	-7.05334	9.71503	8.90243	23250	193	124	10	8.06452	2.44523	102|351|1950|1956|4851|5663|5664|6868|7471|28514	ADAM10|APP|EGF|EGFR|NOTCH1|PSEN1|PSEN2|ADAM17|WNT1|DLL1	-5.66417
Input ID	KEGG Pathway	24	hsa04072	Phospholipase D signaling pathway	-7.04064	11.5582	9.37101	23250	146	124	9	7.25806	2.3299	1950|1956|2475|2911|3630|3643|3845|5294|6654	EGF|EGFR|MTOR|GRM1|INS|INSR|KRAS|PIK3CG|SOS1	-5.65199
Input ID	GO Biological Processes	19	GO:0051346	negative regulation of hydrolase activity	-7.03306	6.00686	7.7371	23250	437	124	14	11.2903	2.84202	274|341|351|1410|1718|2537|2932|5037|5743|6622|7124|7157|11315|23411	BIN1|APOC1|APP|CRYAB|DHCR24|IFI6|GSK3B|PEBP1|PTGS2|SNCA|TNF|TP53|PARK7|SIRT1	-5.64493
Input ID	GO Biological Processes	19	GO:0014013	regulation of gliogenesis	-7.02541	14.2857	9.99111	23250	105	124	8	6.45161	2.20618	177|274|351|1499|2475|3553|4851|5468	AGER|BIN1|APP|CTNNB1|MTOR|IL1B|NOTCH1|PPARG	-5.63935
Input ID	Reactome Gene Sets	6	R-HSA-2179392	EGFR Transactivation by Gastrin	-7.02172	83.3333	18.0897	23250	9	124	4	3.22581	1.58668	1956|3845|4314|6654	EGFR|KRAS|MMP3|SOS1	-5.63669
Input ID	GO Biological Processes	19	GO:1900272	negative regulation of long-term synaptic potentiation	-7.02172	83.3333	18.0897	23250	9	124	4	3.22581	1.58668	177|348|351|5621	AGER|APOE|APP|PRNP	-5.63669
Input ID	GO Biological Processes	19	GO:2000058	regulation of ubiquitin-dependent protein catabolic process	-7.01514	11.4796	9.33322	23250	147	124	9	7.25806	2.3299	1950|2931|2932|5071|5663|7471|10273|11315|57805	EGF|GSK3A|GSK3B|PRKN|PSEN1|WNT1|STUB1|PARK7|CCAR2	-5.63062
Input ID	GO Biological Processes	19	GO:0010288	response to lead ion	-7.0113	42.6136	14.2989	23250	22	124	5	4.03226	1.76655	351|1788|4137|5743|8678	APP|DNMT3A|MAPT|PTGS2|BECN1	-5.62832
Input ID	GO Biological Processes	19	GO:0046879	hormone secretion	-6.98432	7.28155	8.1396	23250	309	124	12	9.67742	2.65502	151|846|1956|3553|3569|3630|4826|5071|7124|7351|11315|23410	ADRA2B|CASR|EGFR|IL1B|IL6|INS|NNAT|PRKN|TNF|UCP2|PARK7|SIRT3	-5.60279
Input ID	GO Biological Processes	19	GO:0038034	signal transduction in absence of ligand	-6.98424	18.4859	10.8052	23250	71	124	7	5.64516	2.07257	2537|2931|2932|3552|3553|7124|9531	IFI6|GSK3A|GSK3B|IL1A|IL1B|TNF|BAG3	-5.60279
Input ID	GO Biological Processes	19	GO:0097192	extrinsic apoptotic signaling pathway in absence of ligand	-6.98424	18.4859	10.8052	23250	71	124	7	5.64516	2.07257	2537|2931|2932|3552|3553|7124|9531	IFI6|GSK3A|GSK3B|IL1A|IL1B|TNF|BAG3	-5.60279
Input ID	GO Biological Processes	19	GO:1902930	regulation of alcohol biosynthetic process	-6.94173	18.2292	10.7215	23250	72	124	7	5.64516	2.07257	338|348|3553|5562|6622|6647|7124	APOB|APOE|IL1B|PRKAA1|SNCA|SOD1|TNF	-5.56283
Input ID	GO Biological Processes	19	GO:0046209	nitric oxide metabolic process	-6.94173	18.2292	10.7215	23250	72	124	7	5.64516	2.07257	2475|3320|3553|3643|5743|7099|7124	MTOR|HSP90AA1|IL1B|INSR|PTGS2|TLR4|TNF	-5.56283
Input ID	GO Biological Processes	19	GO:0050678	regulation of epithelial cell proliferation	-6.94117	6.48271	7.8484	23250	376	124	13	10.4839	2.75106	348|1030|1386|1499|1956|2475|3146|4851|5468|5654|6868|7124|23411	APOE|CDKN2B|ATF2|CTNNB1|EGFR|MTOR|HMGB1|NOTCH1|PPARG|HTRA1|ADAM17|TNF|SIRT1	-5.56277
Input ID	GO Biological Processes	19	GO:0050806	positive regulation of synaptic transmission	-6.93977	11.25	9.22202	23250	150	124	9	7.25806	2.3299	177|348|351|1956|3630|5621|5743|6622|8878	AGER|APOE|APP|EGFR|INS|PRNP|PTGS2|SNCA|SQSTM1	-5.56188
Input ID	GO Biological Processes	19	GO:0018108	peptidyl-tyrosine phosphorylation	-6.92787	6.46552	7.83435	23250	377	124	13	10.4839	2.75106	351|1950|1956|2475|3320|3480|3569|3630|3643|5621|5663|6868|7157	APP|EGF|EGFR|MTOR|HSP90AA1|IGF1R|IL6|INS|INSR|PRNP|PSEN1|ADAM17|TP53	-5.55049
Input ID	GO Biological Processes	19	GO:0010721	negative regulation of cell development	-6.92384	7.1885	8.07146	23250	313	124	12	9.67742	2.65502	348|351|1499|2931|2932|3553|4035|4851|5663|5802|10519|28514	APOE|APP|CTNNB1|GSK3A|GSK3B|IL1B|LRP1|NOTCH1|PSEN1|PTPRS|CIB1|DLL1	-5.54697
Input ID	GO Biological Processes	19	GO:0046165	alcohol biosynthetic process	-6.91502	11.1755	9.18566	23250	151	124	9	7.25806	2.3299	338|348|1718|3553|5562|6622|6647|7124|11315	APOB|APOE|DHCR24|IL1B|PRKAA1|SNCA|SOD1|TNF|PARK7	-5.53965
Input ID	GO Biological Processes	19	GO:0000187	activation of MAPK activity	-6.91502	11.1755	9.18566	23250	151	124	9	7.25806	2.3299	151|1950|2911|3553|3643|5562|6647|7099|7124	ADRA2B|EGF|GRM1|IL1B|INSR|PRKAA1|SOD1|TLR4|TNF	-5.53965
Input ID	GO Biological Processes	19	GO:0010883	regulation of lipid storage	-6.91421	25.5682	11.9443	23250	44	124	6	4.83871	1.92701	338|3569|5465|5468|7124|23411	APOB|IL6|PPARA|PPARG|TNF|SIRT1	-5.53935
Input ID	GO Biological Processes	19	GO:1903203	regulation of oxidative stress-induced neuron death	-6.9067	40.7609	13.9697	23250	23	124	5	4.03226	1.76655	1499|5071|7099|7471|11315	CTNNB1|PRKN|TLR4|WNT1|PARK7	-5.53284
Input ID	GO Biological Processes	19	GO:0042110	T cell activation	-6.90095	5.85938	7.60494	23250	448	124	14	11.2903	2.84202	177|1499|3146|3553|3569|3630|5074|5294|5621|5663|6647|6654|6868|7471	AGER|CTNNB1|HMGB1|IL1B|IL6|INS|PAWR|PIK3CG|PRNP|PSEN1|SOD1|SOS1|ADAM17|WNT1	-5.5291
Input ID	Reactome Gene Sets	6	R-HSA-1980143	Signaling by NOTCH1	-6.89986	17.9795	10.6395	23250	73	124	7	5.64516	2.07257	102|4851|5663|5664|6868|10013|28514	ADAM10|NOTCH1|PSEN1|PSEN2|ADAM17|HDAC6|DLL1	-5.52901
Input ID	GO Biological Processes	19	GO:0097061	dendritic spine organization	-6.89986	17.9795	10.6395	23250	73	124	7	5.64516	2.07257	348|3480|3630|3643|5621|10013|80823	APOE|IGF1R|INS|INSR|PRNP|HDAC6|BHLHB9	-5.52901
Input ID	GO Biological Processes	19	GO:0071229	cellular response to acid chemical	-6.88831	9.32836	8.68349	23250	201	124	10	8.06452	2.44523	338|1788|1956|2475|3553|4313|5468|5562|7124|10891	APOB|DNMT3A|EGFR|MTOR|IL1B|MMP2|PPARG|PRKAA1|TNF|PPARGC1A	-5.51885
Input ID	GO Biological Processes	19	GO:0018212	peptidyl-tyrosine modification	-6.88821	6.41447	7.79252	23250	380	124	13	10.4839	2.75106	351|1950|1956|2475|3320|3480|3569|3630|3643|5621|5663|6868|7157	APP|EGF|EGFR|MTOR|HSP90AA1|IGF1R|IL6|INS|INSR|PRNP|PSEN1|ADAM17|TP53	-5.51885
Input ID	GO Biological Processes	19	GO:1903530	regulation of secretion by cell	-6.86224	4.66691	7.12257	23250	683	124	17	13.7097	3.08876	151|488|846|1956|3146|3552|3553|3569|3630|4826|4851|5071|6622|7099|7124|7351|23410	ADRA2B|ATP2A2|CASR|EGFR|HMGB1|IL1A|IL1B|IL6|INS|NNAT|NOTCH1|PRKN|SNCA|TLR4|TNF|UCP2|SIRT3	-5.49535
Input ID	GO Biological Processes	19	GO:0002265	astrocyte activation involved in immune response	-6.82953	187.5	23.6548	23250	3	124	3	2.41935	1.37981	351|4035|5663	APP|LRP1|PSEN1	-5.46461
Input ID	GO Biological Processes	19	GO:0002064	epithelial cell development	-6.82832	9.19118	8.60451	23250	204	124	10	8.06452	2.44523	1499|2099|2931|2932|3553|4851|5802|6647|7124|28514	CTNNB1|ESR1|GSK3A|GSK3B|IL1B|NOTCH1|PTPRS|SOD1|TNF|DLL1	-5.46389
Input ID	GO Biological Processes	19	GO:0009914	hormone transport	-6.82012	7.03125	7.95505	23250	320	124	12	9.67742	2.65502	151|846|1956|3553|3569|3630|4826|5071|7124|7351|11315|23410	ADRA2B|CASR|EGFR|IL1B|IL6|INS|NNAT|PRKN|TNF|UCP2|PARK7|SIRT3	-5.45716
Input ID	GO Biological Processes	19	GO:2001057	reactive nitrogen species metabolic process	-6.81798	17.5	10.4801	23250	75	124	7	5.64516	2.07257	2475|3320|3553|3643|5743|7099|7124	MTOR|HSP90AA1|IL1B|INSR|PTGS2|TLR4|TNF	-5.45551
Input ID	GO Biological Processes	19	GO:1903050	regulation of proteolysis involved in cellular protein catabolic process	-6.80854	9.14634	8.57855	23250	205	124	10	8.06452	2.44523	1950|2931|2932|5071|5566|5663|7471|10273|11315|57805	EGF|GSK3A|GSK3B|PRKN|PRKACA|PSEN1|WNT1|STUB1|PARK7|CCAR2	-5.44744
Input ID	GO Biological Processes	19	GO:1901984	negative regulation of protein acetylation	-6.8071	39.0625	13.6609	23250	24	124	5	4.03226	1.76655	672|2932|6622|11315|23411	BRCA1|GSK3B|SNCA|PARK7|SIRT1	-5.44744
Input ID	GO Biological Processes	19	GO:0036475	neuron death in response to oxidative stress	-6.8071	39.0625	13.6609	23250	24	124	5	4.03226	1.76655	1499|5071|7099|7471|11315	CTNNB1|PRKN|TLR4|WNT1|PARK7	-5.44744
Input ID	GO Biological Processes	19	GO:0010822	positive regulation of mitochondrion organization	-6.80708	13.3929	9.62676	23250	112	124	8	6.45161	2.20618	2931|2932|5071|5562|7157|10013|10891|11315	GSK3A|GSK3B|PRKN|PRKAA1|TP53|HDAC6|PPARGC1A|PARK7	-5.44744
Input ID	GO Biological Processes	19	GO:0048812	neuron projection morphogenesis	-6.80459	4.93421	7.19805	23250	608	124	16	12.9032	3.0105	348|351|1499|1956|2932|3320|4137|4851|5071|5663|5802|6654|7345|9638|10013|80823	APOE|APP|CTNNB1|EGFR|GSK3B|HSP90AA1|MAPT|NOTCH1|PRKN|PSEN1|PTPRS|SOS1|UCHL1|FEZ1|HDAC6|BHLHB9	-5.44601
Input ID	GO Biological Processes	19	GO:1901033	positive regulation of response to reactive oxygen species	-6.80167	75	17.1386	23250	10	124	4	3.22581	1.58668	5074|7124|10013|11315	PAWR|TNF|HDAC6|PARK7	-5.44406
Input ID	GO Biological Processes	19	GO:0007220	Notch receptor processing	-6.80167	75	17.1386	23250	10	124	4	3.22581	1.58668	102|5663|5664|6868	ADAM10|PSEN1|PSEN2|ADAM17	-5.44406
Input ID	GO Biological Processes	19	GO:0000422	autophagy of mitochondrion	-6.77793	17.2697	10.4028	23250	76	124	7	5.64516	2.07257	2931|5071|8678|8878|10013|10891|11315	GSK3A|PRKN|BECN1|SQSTM1|HDAC6|PPARGC1A|PARK7	-5.42368
Input ID	GO Biological Processes	19	GO:0060291	long-term synaptic potentiation	-6.77793	17.2697	10.4028	23250	76	124	7	5.64516	2.07257	177|348|351|3630|5621|6622|8878	AGER|APOE|APP|INS|PRNP|SNCA|SQSTM1	-5.42368
Input ID	GO Biological Processes	19	GO:0061726	mitochondrion disassembly	-6.77793	17.2697	10.4028	23250	76	124	7	5.64516	2.07257	2931|5071|8678|8878|10013|10891|11315	GSK3A|PRKN|BECN1|SQSTM1|HDAC6|PPARGC1A|PARK7	-5.42368
Input ID	GO Biological Processes	19	GO:0007613	memory	-6.77712	13.2743	9.57737	23250	113	124	8	6.45161	2.20618	348|2475|3553|3643|4137|5621|5663|5743	APOE|MTOR|IL1B|INSR|MAPT|PRNP|PSEN1|PTGS2	-5.42335
Input ID	GO Biological Processes	19	GO:0016241	regulation of macroautophagy	-6.77022	10.7484	8.97441	23250	157	124	9	7.25806	2.3299	823|2475|5071|5566|7345|8678|9638|10013|23411	CAPN1|MTOR|PRKN|PRKACA|UCHL1|BECN1|FEZ1|HDAC6|SIRT1	-5.41741
Input ID	GO Biological Processes	19	GO:0045931	positive regulation of mitotic cell cycle	-6.77022	10.7484	8.97441	23250	157	124	9	7.25806	2.3299	328|351|1950|3552|3553|3630|3643|5037|8678	APEX1|APP|EGF|IL1A|IL1B|INS|INSR|PEBP1|BECN1	-5.41741
Input ID	GO Biological Processes	19	GO:0034504	protein localization to nucleus	-6.7633	7.84221	8.17138	23250	263	124	11	8.87097	2.55331	2932|3630|4000|5300|5534|5663|5743|7124|9531|11315|23411	GSK3B|INS|LMNA|PIN1|PPP3R1|PSEN1|PTGS2|TNF|BAG3|PARK7|SIRT1	-5.41097
Input ID	GO Biological Processes	19	GO:0015980	energy derivation by oxidation of organic compounds	-6.74676	7.8125	8.15154	23250	264	124	11	8.87097	2.55331	2475|2931|2932|3146|3630|3643|6622|9365|10891|11315|23410	MTOR|GSK3A|GSK3B|HMGB1|INS|INSR|SNCA|KL|PPARGC1A|PARK7|SIRT3	-5.39728
Input ID	GO Biological Processes	19	GO:0044262	cellular carbohydrate metabolic process	-6.74676	7.8125	8.15154	23250	264	124	11	8.87097	2.55331	2475|2931|2932|3146|3630|3643|5071|5465|6622|10891|23411	MTOR|GSK3A|GSK3B|HMGB1|INS|INSR|PRKN|PPARA|SNCA|PPARGC1A|SIRT1	-5.39728
Input ID	GO Biological Processes	19	GO:0008631	intrinsic apoptotic signaling pathway in response to oxidative stress	-6.73772	23.9362	11.5255	23250	47	124	6	4.83871	1.92701	3630|5071|6647|11315|23411|51527	INS|PRKN|SOD1|PARK7|SIRT1|GSKIP	-5.39249
Input ID	Reactome Gene Sets	6	R-HSA-6783783	Interleukin-10 signaling	-6.73772	23.9362	11.5255	23250	47	124	6	4.83871	1.92701	1234|3552|3553|3569|5743|7124	CCR5|IL1A|IL1B|IL6|PTGS2|TNF	-5.39249
Input ID	GO Biological Processes	19	GO:0050999	regulation of nitric-oxide synthase activity	-6.73772	23.9362	11.5255	23250	47	124	6	4.83871	1.92701	348|1956|3320|3553|3630|3845	APOE|EGFR|HSP90AA1|IL1B|INS|KRAS	-5.39249
Input ID	GO Biological Processes	19	GO:0009306	protein secretion	-6.73345	5.23743	7.2747	23250	537	124	15	12.0968	2.92837	846|1956|3146|3552|3553|3569|3630|4826|4851|5071|7099|7124|7351|11315|23410	CASR|EGFR|HMGB1|IL1A|IL1B|IL6|INS|NNAT|NOTCH1|PRKN|TLR4|TNF|UCP2|PARK7|SIRT3	-5.38869
Input ID	GO Biological Processes	19	GO:0010975	regulation of neuron projection development	-6.72687	5.66955	7.43163	23250	463	124	14	11.2903	2.84202	348|2475|2931|2932|4035|4137|5071|5653|5663|5802|6280|9638|10519|80823	APOE|MTOR|GSK3A|GSK3B|LRP1|MAPT|PRKN|KLK6|PSEN1|PTPRS|S100A9|FEZ1|CIB1|BHLHB9	-5.38305
Input ID	GO Biological Processes	19	GO:0002687	positive regulation of leukocyte migration	-6.71806	13.0435	9.48045	23250	115	124	8	6.45161	2.20618	102|351|3146|3552|3553|3569|6868|7124	ADAM10|APP|HMGB1|IL1A|IL1B|IL6|ADAM17|TNF	-5.3761
Input ID	GO Biological Processes	19	GO:0032800	receptor biosynthetic process	-6.71204	37.5	13.3705	23250	25	124	5	4.03226	1.76655	5465|5468|7124|10013|11315	PPARA|PPARG|TNF|HDAC6|PARK7	-5.37055
Input ID	GO Biological Processes	19	GO:0006953	acute-phase response	-6.68161	23.4375	11.3945	23250	48	124	6	4.83871	1.92701	3552|3553|3569|3630|5743|7124	IL1A|IL1B|IL6|INS|PTGS2|TNF	-5.34383
Input ID	GO Biological Processes	19	GO:0043525	positive regulation of neuron apoptotic process	-6.68161	23.4375	11.3945	23250	48	124	6	4.83871	1.92701	1386|1499|2931|3553|5300|5621	ATF2|CTNNB1|GSK3A|IL1B|PIN1|PRNP	-5.34383
Input ID	Canonical Pathways	11	M142	PID AJDISS 2PATHWAY	-6.68161	23.4375	11.3945	23250	48	124	6	4.83871	1.92701	102|1499|1950|1956|3480|4314	ADAM10|CTNNB1|EGF|EGFR|IGF1R|MMP3	-5.34383
Input ID	GO Biological Processes	19	GO:0120039	plasma membrane bounded cell projection morphogenesis	-6.67147	4.82315	7.07712	23250	622	124	16	12.9032	3.0105	348|351|1499|1956|2932|3320|4137|4851|5071|5663|5802|6654|7345|9638|10013|80823	APOE|APP|CTNNB1|EGFR|GSK3B|HSP90AA1|MAPT|NOTCH1|PRKN|PSEN1|PTPRS|SOS1|UCHL1|FEZ1|HDAC6|BHLHB9	-5.33461
Input ID	GO Biological Processes	19	GO:0048858	cell projection morphogenesis	-6.6621	4.81541	7.06862	23250	623	124	16	12.9032	3.0105	348|351|1499|1956|2932|3320|4137|4851|5071|5663|5802|6654|7345|9638|10013|80823	APOE|APP|CTNNB1|EGFR|GSK3B|HSP90AA1|MAPT|NOTCH1|PRKN|PSEN1|PTPRS|SOS1|UCHL1|FEZ1|HDAC6|BHLHB9	-5.32708
Input ID	GO Biological Processes	19	GO:0042177	negative regulation of protein catabolic process	-6.66012	12.8205	9.3859	23250	117	124	8	6.45161	2.20618	1956|3630|5300|5663|6622|7471|11315|57805	EGFR|INS|PIN1|PSEN1|SNCA|WNT1|PARK7|CCAR2	-5.32556
Input ID	GO Biological Processes	19	GO:0051186	cofactor metabolic process	-6.63102	5.14168	7.1778	23250	547	124	15	12.0968	2.92837	1956|3313|3320|3630|3643|4314|5465|5562|5743|6622|6647|8574|10013|10891|11315	EGFR|HSPA9|HSP90AA1|INS|INSR|MMP3|PPARA|PRKAA1|PTGS2|SNCA|SOD1|AKR7A2|HDAC6|PPARGC1A|PARK7	-5.29966
Input ID	GO Biological Processes	19	GO:1905953	negative regulation of lipid localization	-6.62678	22.9592	11.2674	23250	49	124	6	4.83871	1.92701	341|1950|3569|5465|5468|7124	APOC1|EGF|IL6|PPARA|PPARG|TNF	-5.29631
Input ID	GO Biological Processes	19	GO:1903320	regulation of protein modification by small protein conjugation or removal	-6.61652	8.72093	8.32832	23250	215	124	10	8.06452	2.44523	672|1499|2475|2931|3320|5071|5300|5663|10273|11315	BRCA1|CTNNB1|MTOR|GSK3A|HSP90AA1|PRKN|PIN1|PSEN1|STUB1|PARK7	-5.28652
Input ID	GO Biological Processes	19	GO:0048660	regulation of smooth muscle cell proliferation	-6.60886	10.2896	8.74196	23250	164	124	9	7.25806	2.3299	1499|1956|2475|3569|4313|5468|5743|7124|10891	CTNNB1|EGFR|MTOR|IL6|MMP2|PPARG|PTGS2|TNF|PPARGC1A	-5.28021
Input ID	GO Biological Processes	19	GO:0001660	fever generation	-6.60717	68.1818	16.3193	23250	11	124	4	3.22581	1.58668	3552|3553|5743|7124	IL1A|IL1B|PTGS2|TNF	-5.27897
Input ID	GO Biological Processes	19	GO:0021543	pallium development	-6.58644	10.2273	8.7099	23250	165	124	9	7.25806	2.3299	1499|1956|2932|4035|5037|5663|5802|7515|9638	CTNNB1|EGFR|GSK3B|LRP1|PEBP1|PSEN1|PTPRS|XRCC1|FEZ1	-5.26004
Input ID	GO Biological Processes	19	GO:0051403	stress-activated MAPK cascade	-6.58518	7.52737	7.95865	23250	274	124	11	8.87097	2.55331	177|351|846|1410|1956|3146|3480|3553|4077|5071|7124	AGER|APP|CASR|CRYAB|EGFR|HMGB1|IGF1R|IL1B|NBR1|PRKN|TNF	-5.25924
Input ID	GO Biological Processes	19	GO:0051055	negative regulation of lipid biosynthetic process	-6.57315	22.5	11.144	23250	50	124	6	4.83871	1.92701	341|348|672|5562|6647|23411	APOC1|APOE|BRCA1|PRKAA1|SOD1|SIRT1	-5.24944
Input ID	Reactome Gene Sets	6	R-HSA-1227986	Signaling by ERBB2	-6.57315	22.5	11.144	23250	50	124	6	4.83871	1.92701	1950|1956|3320|3845|6654|10273	EGF|EGFR|HSP90AA1|KRAS|SOS1|STUB1	-5.24944
Input ID	GO Biological Processes	19	GO:0009409	response to cold	-6.57315	22.5	11.144	23250	50	124	6	4.83871	1.92701	3320|5468|5562|7351|7352|10891	HSP90AA1|PPARG|PRKAA1|UCP2|UCP3|PPARGC1A	-5.24944
Input ID	GO Biological Processes	19	GO:0072594	establishment of protein localization to organelle	-6.57065	5.0859	7.12079	23250	553	124	15	12.0968	2.92837	2931|3320|3416|3921|4000|4137|5071|5534|5562|5663|5743|7124|7157|9531|23411	GSK3A|HSP90AA1|IDE|RPSA|LMNA|MAPT|PRKN|PPP3R1|PRKAA1|PSEN1|PTGS2|TNF|TP53|BAG3|SIRT1	-5.24783
Input ID	GO Biological Processes	19	GO:0006898	receptor-mediated endocytosis	-6.565	6.6568	7.67116	23250	338	124	12	9.67742	2.65502	177|338|341|348|351|1950|3320|4035|5663|6622|28514|53353	AGER|APOB|APOC1|APOE|APP|EGF|HSP90AA1|LRP1|PSEN1|SNCA|DLL1|LRP1B	-5.24335
Input ID	GO Biological Processes	19	GO:0060249	anatomical structure homeostasis	-6.5592	6.00369	7.44784	23250	406	124	13	10.4839	2.75106	328|1499|1956|3320|3569|3845|4851|4968|5071|5562|6647|7099|7515	APEX1|CTNNB1|EGFR|HSP90AA1|IL6|KRAS|NOTCH1|OGG1|PRKN|PRKAA1|SOD1|TLR4|XRCC1	-5.24127
Input ID	GO Biological Processes	19	GO:0008637	apoptotic mitochondrial changes	-6.54744	12.3967	9.20356	23250	121	124	8	6.45161	2.20618	1386|2537|2931|2932|4000|5071|7157|57805	ATF2|IFI6|GSK3A|GSK3B|LMNA|PRKN|TP53|CCAR2	-5.23127
Input ID	KEGG Pathway	24	hsa04152	AMPK signaling pathway	-6.54744	12.3967	9.20356	23250	121	124	8	6.45161	2.20618	2475|3480|3630|3643|5468|5562|10891|23411	MTOR|IGF1R|INS|INSR|PPARG|PRKAA1|PPARGC1A|SIRT1	-5.23127
Input ID	GO Biological Processes	19	GO:0048659	smooth muscle cell proliferation	-6.54204	10.1048	8.64659	23250	167	124	9	7.25806	2.3299	1499|1956|2475|3569|4313|5468|5743|7124|10891	CTNNB1|EGFR|MTOR|IL6|MMP2|PPARG|PTGS2|TNF|PPARGC1A	-5.22631
Input ID	GO Biological Processes	19	GO:0005979	regulation of glycogen biosynthetic process	-6.53405	34.7222	12.8381	23250	27	124	5	4.03226	1.76655	2475|2931|2932|3630|3643	MTOR|GSK3A|GSK3B|INS|INSR	-5.21963
Input ID	GO Biological Processes	19	GO:0010962	regulation of glucan biosynthetic process	-6.53405	34.7222	12.8381	23250	27	124	5	4.03226	1.76655	2475|2931|2932|3630|3643	MTOR|GSK3A|GSK3B|INS|INSR	-5.21963
Input ID	GO Biological Processes	19	GO:0071402	cellular response to lipoprotein particle stimulus	-6.53405	34.7222	12.8381	23250	27	124	5	4.03226	1.76655	348|846|5468|6868|7099	APOE|CASR|PPARG|ADAM17|TLR4	-5.21963
Input ID	GO Biological Processes	19	GO:0051196	regulation of coenzyme metabolic process	-6.52068	22.0588	11.0242	23250	51	124	6	4.83871	1.92701	3630|3643|5465|5562|6622|10891	INS|INSR|PPARA|PRKAA1|SNCA|PPARGC1A	-5.20757
Input ID	GO Biological Processes	19	GO:0070542	response to fatty acid	-6.51275	15.8133	9.89959	23250	83	124	7	5.64516	2.07257	338|3553|5468|5562|5743|7351|10891	APOB|IL1B|PPARG|PRKAA1|PTGS2|UCP2|PPARGC1A	-5.20095
Input ID	GO Biological Processes	19	GO:1902903	regulation of supramolecular fiber organization	-6.51045	6.57895	7.61087	23250	342	124	12	9.67742	2.65502	274|348|351|1410|2475|4137|5071|5663|6622|10013|10519|11315	BIN1|APOE|APP|CRYAB|MTOR|MAPT|PRKN|PSEN1|SNCA|HDAC6|CIB1|PARK7	-5.19958
Input ID	GO Biological Processes	19	GO:0044706	multi-multicellular organism process	-6.50609	8.48416	8.18586	23250	221	124	10	8.06452	2.44523	151|682|2099|2475|3553|3845|4313|5743|6647|7351	ADRA2B|BSG|ESR1|MTOR|IL1B|KRAS|MMP2|PTGS2|SOD1|UCP2	-5.19688
Input ID	GO Biological Processes	19	GO:0006816	calcium ion transport	-6.49877	5.93066	7.38499	23250	411	124	13	10.4839	2.75106	274|488|846|1234|1499|1950|5294|5566|5621|5663|5664|5743|6622	BIN1|ATP2A2|CASR|CCR5|CTNNB1|EGF|PIK3CG|PRKACA|PRNP|PSEN1|PSEN2|PTGS2|SNCA	-5.18999
Input ID	GO Biological Processes	19	GO:0032990	cell part morphogenesis	-6.49655	4.68019	6.91864	23250	641	124	16	12.9032	3.0105	348|351|1499|1956|2932|3320|4137|4851|5071|5663|5802|6654|7345|9638|10013|80823	APOE|APP|CTNNB1|EGFR|GSK3B|HSP90AA1|MAPT|NOTCH1|PRKN|PSEN1|PTPRS|SOS1|UCHL1|FEZ1|HDAC6|BHLHB9	-5.1882
Input ID	GO Biological Processes	19	GO:0031098	stress-activated protein kinase signaling cascade	-6.49144	7.36607	7.84753	23250	280	124	11	8.87097	2.55331	177|351|846|1410|1956|3146|3480|3553|4077|5071|7124	AGER|APP|CASR|CRYAB|EGFR|HMGB1|IGF1R|IL1B|NBR1|PRKN|TNF	-5.18353
Input ID	GO Biological Processes	19	GO:0090287	regulation of cellular response to growth factor stimulus	-6.47604	7.33986	7.82933	23250	281	124	11	8.87097	2.55331	1030|1499|3553|4851|5300|5654|6868|7471|10273|23411|28514	CDKN2B|CTNNB1|IL1B|NOTCH1|PIN1|HTRA1|ADAM17|WNT1|STUB1|SIRT1|DLL1	-5.17071
Input ID	GO Biological Processes	19	GO:1903706	regulation of hemopoiesis	-6.47484	5.90194	7.36014	23250	413	124	13	10.4839	2.75106	177|1499|2475|3146|3313|3553|4851|6647|6654|7099|7124|10519|28514	AGER|CTNNB1|MTOR|HMGB1|HSPA9|IL1B|NOTCH1|SOD1|SOS1|TLR4|TNF|CIB1|DLL1	-5.16993
Input ID	GO Biological Processes	19	GO:0032371	regulation of sterol transport	-6.46932	21.6346	10.9078	23250	52	124	6	4.83871	1.92701	341|348|1950|4035|5468|23411	APOC1|APOE|EGF|LRP1|PPARG|SIRT1	-5.16527
Input ID	GO Biological Processes	19	GO:0032374	regulation of cholesterol transport	-6.46932	21.6346	10.9078	23250	52	124	6	4.83871	1.92701	341|348|1950|4035|5468|23411	APOC1|APOE|EGF|LRP1|PPARG|SIRT1	-5.16527
Input ID	GO Biological Processes	19	GO:0048710	regulation of astrocyte differentiation	-6.45047	33.4821	12.5932	23250	28	124	5	4.03226	1.76655	177|274|351|3553|4851	AGER|BIN1|APP|IL1B|NOTCH1	-5.14855
Input ID	GO Biological Processes	19	GO:0051146	striated muscle cell differentiation	-6.44543	7.28799	7.79319	23250	283	124	11	8.87097	2.55331	2475|2931|3845|4000|4851|5300|7345|7471|7490|8038|28514	MTOR|GSK3A|KRAS|LMNA|NOTCH1|PIN1|UCHL1|WNT1|WT1|ADAM12|DLL1	-5.14393
Input ID	GO Biological Processes	19	GO:0006869	lipid transport	-6.44329	6.48415	7.53686	23250	347	124	12	9.67742	2.65502	338|341|348|1950|3553|4035|5071|5243|5465|5468|9429|23411	APOB|APOC1|APOE|EGF|IL1B|LRP1|PRKN|ABCB1|PPARA|PPARG|ABCG2|SIRT1	-5.14264
Input ID	GO Biological Processes	19	GO:0030155	regulation of cell adhesion	-6.44263	4.63679	6.86988	23250	647	124	16	12.9032	3.0105	102|177|1029|2932|3146|3553|3569|4851|5074|5294|5465|5621|7124|7471|10519|28514	ADAM10|AGER|CDKN2A|GSK3B|HMGB1|IL1B|IL6|NOTCH1|PAWR|PIK3CG|PPARA|PRNP|TNF|WNT1|CIB1|DLL1	-5.1424
Input ID	GO Biological Processes	19	GO:0043280	positive regulation of cysteine-type endopeptidase activity involved in apoptotic process	-6.4388	12	9.02962	23250	125	124	8	6.45161	2.20618	3146|4137|5468|6279|6280|6622|7124|23411	HMGB1|MAPT|PPARG|S100A8|S100A9|SNCA|TNF|SIRT1	-5.139
Input ID	GO Biological Processes	19	GO:0071639	positive regulation of monocyte chemotactic protein-1 production	-6.43287	62.5	15.6038	23250	12	124	4	3.22581	1.58668	177|3146|3552|3553	AGER|HMGB1|IL1A|IL1B	-5.13349
Input ID	GO Biological Processes	19	GO:0030198	extracellular matrix organization	-6.42999	6.46552	7.52224	23250	348	124	12	9.67742	2.65502	102|351|682|4035|4313|4314|4851|5654|7124|7490|8038|9644	ADAM10|APP|BSG|LRP1|MMP2|MMP3|NOTCH1|HTRA1|TNF|WT1|ADAM12|SH3PXD2A	-5.13103
Input ID	GO Biological Processes	19	GO:0090342	regulation of cell aging	-6.41903	21.2264	10.7945	23250	53	124	6	4.83871	1.92701	1029|3845|4000|5074|7471|23411	CDKN2A|KRAS|LMNA|PAWR|WNT1|SIRT1	-5.1205
Input ID	GO Biological Processes	19	GO:0032787	monocarboxylic acid metabolic process	-6.4038	4.93421	6.96364	23250	570	124	15	12.0968	2.92837	341|672|682|2475|3630|3643|5465|5468|5562|5743|6622|7352|10891|11315|23411	APOC1|BRCA1|BSG|MTOR|INS|INSR|PPARA|PPARG|PRKAA1|PTGS2|SNCA|UCP3|PPARGC1A|PARK7|SIRT1	-5.10779
Input ID	GO Biological Processes	19	GO:1904018	positive regulation of vasculature development	-6.39899	8.25991	8.04871	23250	227	124	10	8.06452	2.44523	672|3146|3552|3553|4851|5743|8038|10519|23411|28514	BRCA1|HMGB1|IL1A|IL1B|NOTCH1|PTGS2|ADAM12|CIB1|SIRT1|DLL1	-5.1034
Input ID	GO Biological Processes	19	GO:0044070	regulation of anion transport	-6.37199	15.0862	9.63871	23250	87	124	7	5.64516	2.07257	348|2475|3553|5243|5621|5663|6622	APOE|MTOR|IL1B|ABCB1|PRNP|PSEN1|SNCA	-5.0818
Input ID	GO Biological Processes	19	GO:0006112	energy reserve metabolic process	-6.37199	15.0862	9.63871	23250	87	124	7	5.64516	2.07257	2475|2931|2932|3146|3630|3643|9365	MTOR|GSK3A|GSK3B|HMGB1|INS|INSR|KL	-5.0818
Input ID	GO Biological Processes	19	GO:1901863	positive regulation of muscle tissue development	-6.37199	15.0862	9.63871	23250	87	124	7	5.64516	2.07257	1499|2475|4851|5300|5562|10891|28514	CTNNB1|MTOR|NOTCH1|PIN1|PRKAA1|PPARGC1A|DLL1	-5.0818
Input ID	KEGG Pathway	24	hsa04140	Autophagy - animal	-6.3598	11.7188	8.90429	23250	128	124	8	6.45161	2.20618	2475|3146|3480|3630|3845|5562|5566|8678	MTOR|HMGB1|IGF1R|INS|KRAS|PRKAA1|PRKACA|BECN1	-5.07045
Input ID	GO Biological Processes	19	GO:0048145	regulation of fibroblast proliferation	-6.3379	14.9148	9.57618	23250	88	124	7	5.64516	2.07257	1499|1956|2099|5074|5468|7157|7471	CTNNB1|EGFR|ESR1|PAWR|PPARG|TP53|WNT1	-5.04978
Input ID	GO Biological Processes	19	GO:0048608	reproductive structure development	-6.33407	5.73529	7.21438	23250	425	124	13	10.4839	2.75106	682|1499|1718|1956|2099|3643|4851|5468|5654|5743|6647|7490|23411	BSG|CTNNB1|DHCR24|EGFR|ESR1|INSR|NOTCH1|PPARG|HTRA1|PTGS2|SOD1|WT1|SIRT1	-5.04636
Input ID	GO Biological Processes	19	GO:1903202	negative regulation of oxidative stress-induced cell death	-6.32149	20.4545	10.5771	23250	55	124	6	4.83871	1.92701	1499|3630|5071|7471|11315|23411	CTNNB1|INS|PRKN|WNT1|PARK7|SIRT1	-5.03584
Input ID	GO Biological Processes	19	GO:0043388	positive regulation of DNA binding	-6.32149	20.4545	10.5771	23250	55	124	6	4.83871	1.92701	1499|1950|3146|5071|5468|11315	CTNNB1|EGF|HMGB1|PRKN|PPARG|PARK7	-5.03584
Input ID	GO Biological Processes	19	GO:1900408	negative regulation of cellular response to oxidative stress	-6.32149	20.4545	10.5771	23250	55	124	6	4.83871	1.92701	1499|3630|5071|7471|11315|23411	CTNNB1|INS|PRKN|WNT1|PARK7|SIRT1	-5.03584
Input ID	GO Biological Processes	19	GO:0033002	muscle cell proliferation	-6.31216	8.0819	7.93821	23250	232	124	10	8.06452	2.44523	1499|1956|2475|3569|4313|4851|5468|5743|7124|10891	CTNNB1|EGFR|MTOR|IL6|MMP2|NOTCH1|PPARG|PTGS2|TNF|PPARGC1A	-5.02773
Input ID	GO Biological Processes	19	GO:0050708	regulation of protein secretion	-6.31107	5.70843	7.19062	23250	427	124	13	10.4839	2.75106	846|1956|3146|3552|3553|3569|3630|4826|5071|7099|7124|7351|23410	CASR|EGFR|HMGB1|IL1A|IL1B|IL6|INS|NNAT|PRKN|TLR4|TNF|UCP2|SIRT3	-5.02745
Input ID	GO Biological Processes	19	GO:0042391	regulation of membrane potential	-6.31107	5.70843	7.19062	23250	427	124	13	10.4839	2.75106	274|351|488|2537|2931|2932|4137|5071|5663|6622|6647|7351|11315	BIN1|APP|ATP2A2|IFI6|GSK3A|GSK3B|MAPT|PRKN|PSEN1|SNCA|SOD1|UCP2|PARK7	-5.02745
Input ID	GO Biological Processes	19	GO:0043409	negative regulation of MAPK cascade	-6.30802	9.48034	8.31655	23250	178	124	9	7.25806	2.3299	348|3480|3553|5037|5071|5300|7099|7345|23410	APOE|IGF1R|IL1B|PEBP1|PRKN|PIN1|TLR4|UCHL1|SIRT3	-5.02593
Input ID	GO Biological Processes	19	GO:0048144	fibroblast proliferation	-6.30424	14.7472	9.51465	23250	89	124	7	5.64516	2.07257	1499|1956|2099|5074|5468|7157|7471	CTNNB1|EGFR|ESR1|PAWR|PPARG|TP53|WNT1	-5.02306
Input ID	GO Biological Processes	19	GO:0061458	reproductive system development	-6.29961	5.69509	7.1788	23250	428	124	13	10.4839	2.75106	682|1499|1718|1956|2099|3643|4851|5468|5654|5743|6647|7490|23411	BSG|CTNNB1|DHCR24|EGFR|ESR1|INSR|NOTCH1|PPARG|HTRA1|PTGS2|SOD1|WT1|SIRT1	-5.01946
Input ID	GO Biological Processes	19	GO:0006631	fatty acid metabolic process	-6.29942	6.28492	7.37905	23250	358	124	12	9.67742	2.65502	341|672|2475|3630|5465|5468|5562|5743|6622|7352|10891|23411	APOC1|BRCA1|MTOR|INS|PPARA|PPARG|PRKAA1|PTGS2|SNCA|UCP3|PPARGC1A|SIRT1	-5.01946
Input ID	GO Biological Processes	19	GO:0000303	response to superoxide	-6.29281	31.25	12.14	23250	30	124	5	4.03226	1.76655	6647|7124|7351|7352|11315	SOD1|TNF|UCP2|UCP3|PARK7	-5.01365
Input ID	GO Biological Processes	19	GO:0065005	protein-lipid complex assembly	-6.29281	31.25	12.14	23250	30	124	5	4.03226	1.76655	274|338|341|348|5566	BIN1|APOB|APOC1|APOE|PRKACA	-5.01365
Input ID	GO Biological Processes	19	GO:0042098	T cell proliferation	-6.28755	9.42737	8.28797	23250	179	124	9	7.25806	2.3299	177|1499|3146|3553|3569|5074|5294|5621|6654	AGER|CTNNB1|HMGB1|IL1B|IL6|PAWR|PIK3CG|PRNP|SOS1	-5.0088
Input ID	KEGG Pathway	24	hsa05160	Hepatitis C	-6.28283	11.4504	8.78306	23250	131	124	8	6.45161	2.20618	1950|1956|2932|3845|5465|6654|7124|7157	EGF|EGFR|GSK3B|KRAS|PPARA|SOS1|TNF|TP53	-5.00488
Input ID	GO Biological Processes	19	GO:0043543	protein acylation	-6.27803	8.01282	7.89493	23250	234	124	10	8.06452	2.44523	672|1386|2932|3553|4137|5562|6622|10891|11315|23411	BRCA1|ATF2|GSK3B|IL1B|MAPT|PRKAA1|SNCA|PPARGC1A|PARK7|SIRT1	-5.00168
Input ID	GO Biological Processes	19	GO:0010676	positive regulation of cellular carbohydrate metabolic process	-6.27416	20.0893	10.4727	23250	56	124	6	4.83871	1.92701	3146|3630|3643|5465|6622|10891	HMGB1|INS|INSR|PPARA|SNCA|PPARGC1A	-4.99822
Input ID	GO Biological Processes	19	GO:1900542	regulation of purine nucleotide metabolic process	-6.27098	14.5833	9.45412	23250	90	124	7	5.64516	2.07257	3630|3643|5465|5562|6622|10891|11315	INS|INSR|PPARA|PRKAA1|SNCA|PPARGC1A|PARK7	-4.99544
Input ID	GO Biological Processes	19	GO:0051603	proteolysis involved in cellular protein catabolic process	-6.25009	4.4843	6.69608	23250	669	124	16	12.9032	3.0105	1950|2931|2932|3416|5071|5566|5663|7345|7471|8878|10013|10269|10273|11315|23411|57805	EGF|GSK3A|GSK3B|IDE|PRKN|PRKACA|PSEN1|UCHL1|WNT1|SQSTM1|HDAC6|ZMPSTE24|STUB1|PARK7|SIRT1|CCAR2	-4.97694
Input ID	GO Biological Processes	19	GO:0045088	regulation of innate immune response	-6.24839	6.21547	7.32329	23250	362	124	12	9.67742	2.65502	338|2099|3146|3630|3845|4313|5468|5566|5802|6279|6280|7099	APOB|ESR1|HMGB1|INS|KRAS|MMP2|PPARG|PRKACA|PTPRS|S100A8|S100A9|TLR4	-4.97563
Input ID	GO Biological Processes	19	GO:1905908	positive regulation of amyloid fibril formation	-6.22916	140.625	20.4495	23250	4	124	3	2.41935	1.37981	348|351|5663	APOE|APP|PSEN1	-4.95879
Input ID	GO Biological Processes	19	GO:0042743	hydrogen peroxide metabolic process	-6.22775	19.7368	10.3709	23250	57	124	6	4.83871	1.92701	1956|4314|6622|6647|10013|11315	EGFR|MMP3|SNCA|SOD1|HDAC6|PARK7	-4.95816
Input ID	GO Biological Processes	19	GO:1902883	negative regulation of response to oxidative stress	-6.22775	19.7368	10.3709	23250	57	124	6	4.83871	1.92701	1499|3630|5071|7471|11315|23411	CTNNB1|INS|PRKN|WNT1|PARK7|SIRT1	-4.95816
Input ID	GO Biological Processes	19	GO:1903532	positive regulation of secretion by cell	-6.22312	6.18132	7.29573	23250	364	124	12	9.67742	2.65502	846|1956|3146|3552|3553|3569|3630|4826|6622|7099|7124|23410	CASR|EGFR|HMGB1|IL1A|IL1B|IL6|INS|NNAT|SNCA|TLR4|TNF|SIRT3	-4.95471
Input ID	GO Biological Processes	19	GO:0033028	myeloid cell apoptotic process	-6.21828	30.2419	11.9297	23250	31	124	5	4.03226	1.76655	1029|1234|3569|6868|23411	CDKN2A|CCR5|IL6|ADAM17|SIRT1	-4.95223
Input ID	GO Biological Processes	19	GO:0038128	ERBB2 signaling pathway	-6.21828	30.2419	11.9297	23250	31	124	5	4.03226	1.76655	1950|1956|3320|6654|10273	EGF|EGFR|HSP90AA1|SOS1|STUB1	-4.95223
Input ID	GO Biological Processes	19	GO:1902175	regulation of oxidative stress-induced intrinsic apoptotic signaling pathway	-6.21828	30.2419	11.9297	23250	31	124	5	4.03226	1.76655	3630|5071|6647|11315|23411	INS|PRKN|SOD1|PARK7|SIRT1	-4.95223
Input ID	GO Biological Processes	19	GO:0000305	response to oxygen radical	-6.21828	30.2419	11.9297	23250	31	124	5	4.03226	1.76655	6647|7124|7351|7352|11315	SOD1|TNF|UCP2|UCP3|PARK7	-4.95223
Input ID	GO Biological Processes	19	GO:0051493	regulation of cytoskeleton organization	-6.21202	5.13699	6.92423	23250	511	124	14	11.2903	2.84202	274|672|1499|2475|2932|4035|4137|5071|5562|6279|6280|6622|10013|10519	BIN1|BRCA1|CTNNB1|MTOR|GSK3B|LRP1|MAPT|PRKN|PRKAA1|S100A8|S100A9|SNCA|HDAC6|CIB1	-4.94831
Input ID	GO Biological Processes	19	GO:0050730	regulation of peptidyl-tyrosine phosphorylation	-6.21073	7.87815	7.8099	23250	238	124	10	8.06452	2.44523	351|1950|1956|2475|3569|3630|5621|5663|6868|7157	APP|EGF|EGFR|MTOR|IL6|INS|PRNP|PSEN1|ADAM17|TP53	-4.94744
Input ID	GO Biological Processes	19	GO:0045807	positive regulation of endocytosis	-6.20778	11.194	8.66572	23250	134	124	8	6.45161	2.20618	348|1950|3553|4035|5468|6622|7124|28514	APOE|EGF|IL1B|LRP1|PPARG|SNCA|TNF|DLL1	-4.94524
Input ID	GO Biological Processes	19	GO:0002764	immune response-regulating signaling pathway	-6.20588	4.75888	6.7779	23250	591	124	15	12.0968	2.92837	338|2099|3146|3320|3845|5074|5534|5566|5621|5663|5802|6279|6280|6654|7099	APOB|ESR1|HMGB1|HSP90AA1|KRAS|PAWR|PPP3R1|PRKACA|PRNP|PSEN1|PTPRS|S100A8|S100A9|SOS1|TLR4	-4.94373
Input ID	GO Biological Processes	19	GO:0009755	hormone-mediated signaling pathway	-6.19411	7.84519	7.78896	23250	239	124	10	8.06452	2.44523	672|1499|2099|2100|5465|5468|10013|10891|11315|23411	BRCA1|CTNNB1|ESR1|ESR2|PPARA|PPARG|HDAC6|PPARGC1A|PARK7|SIRT1	-4.93273
Input ID	KEGG Pathway	24	hsa05223	Non-small cell lung cancer	-6.18221	19.3966	10.2717	23250	58	124	6	4.83871	1.92701	1029|1950|1956|3845|6654|7157	CDKN2A|EGF|EGFR|KRAS|SOS1|TP53	-4.92338
Input ID	GO Biological Processes	19	GO:0034248	regulation of cellular amide metabolic process	-6.1646	5.53977	7.0398	23250	440	124	13	10.4839	2.75106	274|348|351|2475|2931|3569|5562|5621|6280|6622|6895|7124|54103	BIN1|APOE|APP|MTOR|GSK3A|IL6|PRKAA1|PRNP|S100A9|SNCA|TARBP2|TNF|GSAP	-4.90822
Input ID	GO Biological Processes	19	GO:1901617	organic hydroxy compound biosynthetic process	-6.1611	7.78008	7.74742	23250	241	124	10	8.06452	2.44523	338|348|1718|3553|5562|6622|6647|7124|11315|23411	APOB|APOE|DHCR24|IL1B|PRKAA1|SNCA|SOD1|TNF|PARK7|SIRT1	-4.90549
Input ID	GO Biological Processes	19	GO:0010952	positive regulation of peptidase activity	-6.14776	9.07258	8.09402	23250	186	124	9	7.25806	2.3299	351|3146|4137|5468|6279|6280|6622|7124|23411	APP|HMGB1|MAPT|PPARG|S100A8|S100A9|SNCA|TNF|SIRT1	-4.89375
Input ID	GO Biological Processes	19	GO:0010574	regulation of vascular endothelial growth factor production	-6.14634	29.2969	11.7291	23250	32	124	5	4.03226	1.76655	672|3552|3553|3569|5743	BRCA1|IL1A|IL1B|IL6|PTGS2	-4.89302
Input ID	GO Biological Processes	19	GO:0070374	positive regulation of ERK1 and ERK2 cascade	-6.14472	7.74793	7.72684	23250	242	124	10	8.06452	2.44523	177|351|1956|3146|3480|3553|3643|4851|7124|10519	AGER|APP|EGFR|HMGB1|IGF1R|IL1B|INSR|NOTCH1|TNF|CIB1	-4.89177
Input ID	GO Biological Processes	19	GO:0006140	regulation of nucleotide metabolic process	-6.14191	13.9628	9.22131	23250	94	124	7	5.64516	2.07257	3630|3643|5465|5562|6622|10891|11315	INS|INSR|PPARA|PRKAA1|SNCA|PPARGC1A|PARK7	-4.88934
Input ID	GO Biological Processes	19	GO:2001244	positive regulation of intrinsic apoptotic signaling pathway	-6.13752	19.0678	10.175	23250	59	124	6	4.83871	1.92701	6279|6280|6647|7157|11315|23411	S100A8|S100A9|SOD1|TP53|PARK7|SIRT1	-4.88571
Input ID	GO Biological Processes	19	GO:0032352	positive regulation of hormone metabolic process	-6.13063	53.5714	14.4077	23250	14	124	4	3.22581	1.58668	3553|5037|7124|10891	IL1B|PEBP1|TNF|PPARGC1A	-4.87923
Input ID	GO Biological Processes	19	GO:0006935	chemotaxis	-6.11464	4.6797	6.69249	23250	601	124	15	12.0968	2.92837	102|177|351|846|1234|3146|3553|3569|4851|5294|6279|6280|6654|6868|9638	ADAM10|AGER|APP|CASR|CCR5|HMGB1|IL1B|IL6|NOTCH1|PIK3CG|S100A8|S100A9|SOS1|ADAM17|FEZ1	-4.86472
Input ID	GO Biological Processes	19	GO:0048661	positive regulation of smooth muscle cell proliferation	-6.11058	13.8158	9.16532	23250	95	124	7	5.64516	2.07257	1956|2475|3569|4313|5743|7124|10891	EGFR|MTOR|IL6|MMP2|PTGS2|TNF|PPARGC1A	-4.86103
Input ID	GO Biological Processes	19	GO:0006694	steroid biosynthetic process	-6.10891	8.97606	8.04048	23250	188	124	9	7.25806	2.3299	338|348|1718|3553|5562|6647|7124|10891|23411	APOB|APOE|DHCR24|IL1B|PRKAA1|SOD1|TNF|PPARGC1A|SIRT1	-4.85974
Input ID	GO Biological Processes	19	GO:0042330	taxis	-6.10562	4.67193	6.68406	23250	602	124	15	12.0968	2.92837	102|177|351|846|1234|3146|3553|3569|4851|5294|6279|6280|6654|6868|9638	ADAM10|AGER|APP|CASR|CCR5|HMGB1|IL1B|IL6|NOTCH1|PIK3CG|S100A8|S100A9|SOS1|ADAM17|FEZ1	-4.85683
Input ID	GO Biological Processes	19	GO:2000756	regulation of peptidyl-lysine acetylation	-6.09365	18.75	10.0806	23250	60	124	6	4.83871	1.92701	672|3553|5562|6622|10891|23411	BRCA1|IL1B|PRKAA1|SNCA|PPARGC1A|SIRT1	-4.84561
Input ID	GO Biological Processes	19	GO:0031396	regulation of protein ubiquitination	-6.08965	8.92857	8.014	23250	189	124	9	7.25806	2.3299	672|2475|2931|3320|5071|5300|5663|10273|11315	BRCA1|MTOR|GSK3A|HSP90AA1|PRKN|PIN1|PSEN1|STUB1|PARK7	-4.84309
Input ID	GO Biological Processes	19	GO:0001678	cellular glucose homeostasis	-6.08674	10.7914	8.47821	23250	139	124	8	6.45161	2.20618	177|846|3553|5562|5566|7351|10891|23411	AGER|CASR|IL1B|PRKAA1|PRKACA|UCP2|PPARGC1A|SIRT1	-4.84057
Input ID	Reactome Gene Sets	6	R-HSA-6811558	PI5P, PP2A and IER3 Regulate PI3K/AKT Signaling	-6.07961	13.6719	9.11016	23250	96	124	7	5.64516	2.07257	1950|1956|2099|2100|3630|3643|9365	EGF|EGFR|ESR1|ESR2|INS|INSR|KL	-4.8353
Input ID	GO Biological Processes	19	GO:0030518	intracellular steroid hormone receptor signaling pathway	-6.06311	10.7143	8.44185	23250	140	124	8	6.45161	2.20618	672|1499|2099|2100|10013|10891|11315|23411	BRCA1|CTNNB1|ESR1|ESR2|HDAC6|PPARGC1A|PARK7|SIRT1	-4.82067
Input ID	GO Biological Processes	19	GO:0051604	protein maturation	-6.06273	5.96817	7.12145	23250	377	124	12	9.67742	2.65502	102|1510|1718|4826|5566|5621|5653|5663|5664|10269|10273|25825	ADAM10|CTSE|DHCR24|NNAT|PRKACA|PRNP|KLK6|PSEN1|PSEN2|ZMPSTE24|STUB1|BACE2	-4.82065
Input ID	GO Biological Processes	19	GO:0042136	neurotransmitter biosynthetic process	-6.04899	13.5309	9.05583	23250	97	124	7	5.64516	2.07257	2475|3320|3553|3643|5743|7099|7124	MTOR|HSP90AA1|IL1B|INSR|PTGS2|TLR4|TNF	-4.80802
Input ID	GO Biological Processes	19	GO:2001056	positive regulation of cysteine-type endopeptidase activity	-6.03967	10.6383	8.40586	23250	141	124	8	6.45161	2.20618	3146|4137|5468|6279|6280|6622|7124|23411	HMGB1|MAPT|PPARG|S100A8|S100A9|SNCA|TNF|SIRT1	-4.79944
Input ID	GO Biological Processes	19	GO:0002573	myeloid leukocyte differentiation	-6.03257	8.78906	7.93575	23250	192	124	9	7.25806	2.3299	351|1499|2475|5468|5663|7099|7124|9644|23411	APP|CTNNB1|MTOR|PPARG|PSEN1|TLR4|TNF|SH3PXD2A|SIRT1	-4.79308
Input ID	GO Biological Processes	19	GO:1903008	organelle disassembly	-6.01871	13.3929	9.00229	23250	98	124	7	5.64516	2.07257	2931|5071|8678|8878|10013|10891|11315	GSK3A|PRKN|BECN1|SQSTM1|HDAC6|PPARGC1A|PARK7	-4.78033
Input ID	GO Biological Processes	19	GO:0038127	ERBB signaling pathway	-6.01641	10.5634	8.37023	23250	142	124	8	6.45161	2.20618	351|1950|1956|3320|5663|6654|6868|10273	APP|EGF|EGFR|HSP90AA1|PSEN1|SOS1|ADAM17|STUB1	-4.77839
Input ID	GO Biological Processes	19	GO:0007623	circadian rhythm	-6.01377	8.74352	7.91004	23250	193	124	9	7.25806	2.3299	1956|2932|5465|5468|5562|7157|10891|23411|57805	EGFR|GSK3B|PPARA|PPARG|PRKAA1|TP53|PPARGC1A|SIRT1|CCAR2	-4.77611
Input ID	GO Biological Processes	19	GO:0010573	vascular endothelial growth factor production	-6.00961	27.5735	11.3542	23250	34	124	5	4.03226	1.76655	672|3552|3553|3569|5743	BRCA1|IL1A|IL1B|IL6|PTGS2	-4.77305
Input ID	GO Biological Processes	19	GO:0032148	activation of protein kinase B activity	-6.00961	27.5735	11.3542	23250	34	124	5	4.03226	1.76655	151|2475|3630|3643|11315	ADRA2B|MTOR|INS|INSR|PARK7	-4.77305
Input ID	GO Biological Processes	19	GO:0090322	regulation of superoxide metabolic process	-6.00961	27.5735	11.3542	23250	34	124	5	4.03226	1.76655	1956|4137|6647|7124|11315	EGFR|MAPT|SOD1|TNF|PARK7	-4.77305
Input ID	GO Biological Processes	19	GO:0000904	cell morphogenesis involved in differentiation	-5.99986	4.29185	6.4708	23250	699	124	16	12.9032	3.0105	348|351|1499|2932|3320|4137|4851|5663|5802|6647|6654|7345|9638|10013|10519|80823	APOE|APP|CTNNB1|GSK3B|HSP90AA1|MAPT|NOTCH1|PSEN1|PTPRS|SOD1|SOS1|UCHL1|FEZ1|HDAC6|CIB1|BHLHB9	-4.76554
Input ID	GO Biological Processes	19	GO:0036270	response to diuretic	-5.99773	50	13.9006	23250	15	124	4	3.22581	1.58668	1789|5468|5562|10891	DNMT3B|PPARG|PRKAA1|PPARGC1A	-4.76554
Input ID	GO Biological Processes	19	GO:0051044	positive regulation of membrane protein ectodomain proteolysis	-5.99773	50	13.9006	23250	15	124	4	3.22581	1.58668	348|3553|4898|7124	APOE|IL1B|NRDC|TNF	-4.76554
Input ID	GO Biological Processes	19	GO:0055089	fatty acid homeostasis	-5.99773	50	13.9006	23250	15	124	4	3.22581	1.58668	348|3630|5562|23411	APOE|INS|PRKAA1|SIRT1	-4.76554
Input ID	GO Biological Processes	19	GO:0031000	response to caffeine	-5.99773	50	13.9006	23250	15	124	4	3.22581	1.58668	1789|5468|5562|10891	DNMT3B|PPARG|PRKAA1|PPARGC1A	-4.76554
Input ID	Reactome Gene Sets	6	R-HSA-2691230	Signaling by NOTCH1 HD Domain Mutants in Cancer	-5.99773	50	13.9006	23250	15	124	4	3.22581	1.58668	102|4851|6868|28514	ADAM10|NOTCH1|ADAM17|DLL1	-4.76554
Input ID	GO Biological Processes	19	GO:0030730	sequestering of triglyceride	-5.99773	50	13.9006	23250	15	124	4	3.22581	1.58668	3553|5465|5468|7124	IL1B|PPARA|PPARG|TNF	-4.76554
Input ID	GO Biological Processes	19	GO:0031657	regulation of cyclin-dependent protein serine/threonine kinase activity involved in G1/S transition	-5.99773	50	13.9006	23250	15	124	4	3.22581	1.58668	1029|1030|1956|6868	CDKN2A|CDKN2B|EGFR|ADAM17	-4.76554
Input ID	Reactome Gene Sets	6	R-HSA-2691232	Constitutive Signaling by NOTCH1 HD Domain Mutants	-5.99773	50	13.9006	23250	15	124	4	3.22581	1.58668	102|4851|6868|28514	ADAM10|NOTCH1|ADAM17|DLL1	-4.76554
Input ID	GO Biological Processes	19	GO:0042133	neurotransmitter metabolic process	-5.99334	10.4895	8.33495	23250	143	124	8	6.45161	2.20618	2475|3320|3553|3643|5037|5743|7099|7124	MTOR|HSP90AA1|IL1B|INSR|PEBP1|PTGS2|TLR4|TNF	-4.76223
Input ID	GO Biological Processes	19	GO:0008610	lipid biosynthetic process	-5.99175	4.28571	6.46351	23250	700	124	16	12.9032	3.0105	338|341|348|672|1718|2475|3553|3630|5294|5562|5743|6647|7124|9365|10891|23411	APOB|APOC1|APOE|BRCA1|DHCR24|MTOR|IL1B|INS|PIK3CG|PRKAA1|PTGS2|SOD1|TNF|KL|PPARGC1A|SIRT1	-4.76101
Input ID	GO Biological Processes	19	GO:0070838	divalent metal ion transport	-5.99127	5.34539	6.86221	23250	456	124	13	10.4839	2.75106	274|488|846|1234|1499|1950|5294|5566|5621|5663|5664|5743|6622	BIN1|ATP2A2|CASR|CCR5|CTNNB1|EGF|PIK3CG|PRKACA|PRNP|PSEN1|PSEN2|PTGS2|SNCA	-4.76088
Input ID	KEGG Pathway	24	hsa04933	AGE-RAGE signaling pathway in diabetic complications	-5.98878	13.2576	8.94953	23250	99	124	7	5.64516	2.07257	177|3552|3553|3569|3845|4313|7124	AGER|IL1A|IL1B|IL6|KRAS|MMP2|TNF	-4.75875
Input ID	GO Biological Processes	19	GO:0032409	regulation of transporter activity	-5.96941	7.41107	7.50789	23250	253	124	10	8.06452	2.44523	351|823|3630|5243|5468|5566|5621|6622|10891|11315	APP|CAPN1|INS|ABCB1|PPARG|PRKACA|PRNP|SNCA|PPARGC1A|PARK7	-4.74075
Input ID	GO Biological Processes	19	GO:0051259	protein complex oligomerization	-5.96643	4.89739	6.68455	23250	536	124	14	11.2903	2.84202	348|1410|3416|3480|3630|3643|4077|4137|4314|5562|5621|7157|8878|10013	APOE|CRYAB|IDE|IGF1R|INS|INSR|NBR1|MAPT|MMP3|PRKAA1|PRNP|TP53|SQSTM1|HDAC6	-4.73857
Input ID	GO Biological Processes	19	GO:0072511	divalent inorganic cation transport	-5.94907	5.29891	6.81912	23250	460	124	13	10.4839	2.75106	274|488|846|1234|1499|1950|5294|5566|5621|5663|5664|5743|6622	BIN1|ATP2A2|CASR|CCR5|CTNNB1|EGF|PIK3CG|PRKACA|PRNP|PSEN1|PSEN2|PTGS2|SNCA	-4.72299
Input ID	GO Biological Processes	19	GO:0032350	regulation of hormone metabolic process	-5.94452	26.7857	11.1787	23250	35	124	5	4.03226	1.76655	3553|5037|7124|10273|10891	IL1B|PEBP1|TNF|STUB1|PPARGC1A	-4.72057
Input ID	Canonical Pathways	11	M249	PID PI3KCI AKT PATHWAY	-5.94452	26.7857	11.1787	23250	35	124	5	4.03226	1.76655	2475|2931|2932|3320|5566	MTOR|GSK3A|GSK3B|HSP90AA1|PRKACA	-4.72057
Input ID	GO Biological Processes	19	GO:0010212	response to ionizing radiation	-5.92517	10.274	8.23117	23250	146	124	8	6.45161	2.20618	672|1410|1788|1789|3553|5562|7157|23411	BRCA1|CRYAB|DNMT3A|DNMT3B|IL1B|PRKAA1|TP53|SIRT1	-4.70264
Input ID	GO Biological Processes	19	GO:0044419	interspecies interaction between organisms	-5.91489	3.98936	6.29646	23250	799	124	17	13.7097	3.08876	274|348|1234|1499|1956|3416|3643|3921|4851|5071|6280|6895|7124|7157|8678|8878|23411	BIN1|APOE|CCR5|CTNNB1|EGFR|IDE|INSR|RPSA|NOTCH1|PRKN|S100A9|TARBP2|TNF|TP53|BECN1|SQSTM1|SIRT1	-4.69342
Input ID	GO Biological Processes	19	GO:1901222	regulation of NIK/NF-kappaB signaling	-5.90092	12.8676	8.79571	23250	102	124	7	5.64516	2.07257	177|351|1956|3146|3553|7099|7124	AGER|APP|EGFR|HMGB1|IL1B|TLR4|TNF	-4.68122
Input ID	KEGG Pathway	24	hsa04137	Mitophagy - animal	-5.88564	17.3077	9.6407	23250	65	124	6	4.83871	1.92701	3845|4077|5071|7157|8678|8878	KRAS|NBR1|PRKN|TP53|BECN1|SQSTM1	-4.66789
Input ID	GO Biological Processes	19	GO:0014823	response to activity	-5.88564	17.3077	9.6407	23250	65	124	6	4.83871	1.92701	1789|2475|5037|5562|7352|10891	DNMT3B|MTOR|PEBP1|PRKAA1|UCP3|PPARGC1A	-4.66789
Input ID	GO Biological Processes	19	GO:0016051	carbohydrate biosynthetic process	-5.88514	8.4375	7.73516	23250	200	124	9	7.25806	2.3299	1950|2475|2931|2932|3630|3643|5465|6622|10891	EGF|MTOR|GSK3A|GSK3B|INS|INSR|PPARA|SNCA|PPARGC1A	-4.66789
Input ID	GO Biological Processes	19	GO:0045766	positive regulation of angiogenesis	-5.88514	8.4375	7.73516	23250	200	124	9	7.25806	2.3299	672|3146|3552|3553|5743|8038|10519|23411|28514	BRCA1|HMGB1|IL1A|IL1B|PTGS2|ADAM12|CIB1|SIRT1|DLL1	-4.66789
Input ID	GO Biological Processes	19	GO:1903580	positive regulation of ATP metabolic process	-5.88143	26.0417	11.0104	23250	36	124	5	4.03226	1.76655	3630|3643|5562|10891|11315	INS|INSR|PRKAA1|PPARGC1A|PARK7	-4.66452
Input ID	GO Biological Processes	19	GO:0090335	regulation of brown fat cell differentiation	-5.87459	46.875	13.4412	23250	16	124	4	3.22581	1.58668	2475|3630|5743|23411	MTOR|INS|PTGS2|SIRT1	-4.66012
Input ID	Reactome Gene Sets	6	R-HSA-1963640	GRB2 events in ERBB2 signaling	-5.87459	46.875	13.4412	23250	16	124	4	3.22581	1.58668	1950|1956|3845|6654	EGF|EGFR|KRAS|SOS1	-4.66012
Input ID	GO Biological Processes	19	GO:0070885	negative regulation of calcineurin-NFAT signaling cascade	-5.87459	46.875	13.4412	23250	16	124	4	3.22581	1.58668	1827|2475|2932|5621	RCAN1|MTOR|GSK3B|PRNP	-4.66012
Input ID	GO Biological Processes	19	GO:0106057	negative regulation of calcineurin-mediated signaling	-5.87459	46.875	13.4412	23250	16	124	4	3.22581	1.58668	1827|2475|2932|5621	RCAN1|MTOR|GSK3B|PRNP	-4.66012
Input ID	GO Biological Processes	19	GO:0010893	positive regulation of steroid biosynthetic process	-5.87459	46.875	13.4412	23250	16	124	4	3.22581	1.58668	3553|5562|7124|10891	IL1B|PRKAA1|TNF|PPARGC1A	-4.66012
Input ID	GO Biological Processes	19	GO:0051052	regulation of DNA metabolic process	-5.87405	5.72519	6.91781	23250	393	124	12	9.67742	2.65502	672|1499|1956|2931|3146|3320|4968|5468|7157|7515|10891|23411	BRCA1|CTNNB1|EGFR|GSK3A|HMGB1|HSP90AA1|OGG1|PPARG|TP53|XRCC1|PPARGC1A|SIRT1	-4.65993
Input ID	KEGG Pathway	24	hsa04922	Glucagon signaling pathway	-5.87227	12.7427	8.74586	23250	103	124	7	5.64516	2.07257	1386|5465|5534|5562|5566|10891|23411	ATF2|PPARA|PPP3R1|PRKAA1|PRKACA|PPARGC1A|SIRT1	-4.65969
Input ID	Reactome Gene Sets	6	R-HSA-199418	Negative regulation of the PI3K/AKT network	-5.87227	12.7427	8.74586	23250	103	124	7	5.64516	2.07257	1950|1956|2099|2100|3630|3643|9365	EGF|EGFR|ESR1|ESR2|INS|INSR|KL	-4.65969
Input ID	GO Biological Processes	19	GO:0048667	cell morphogenesis involved in neuron differentiation	-5.87208	4.80769	6.5928	23250	546	124	14	11.2903	2.84202	348|351|2932|3320|4137|4851|5663|5802|6647|6654|7345|9638|10013|80823	APOE|APP|GSK3B|HSP90AA1|MAPT|NOTCH1|PSEN1|PTPRS|SOD1|SOS1|UCHL1|FEZ1|HDAC6|BHLHB9	-4.65969
Input ID	GO Biological Processes	19	GO:0034612	response to tumor necrosis factor	-5.86233	7.21154	7.37529	23250	260	124	10	8.06452	2.44523	102|338|672|5071|5743|6868|7124|10519|10891|23411	ADAM10|APOB|BRCA1|PRKN|PTGS2|ADAM17|TNF|CIB1|PPARGC1A|SIRT1	-4.65063
Input ID	GO Biological Processes	19	GO:1901861	regulation of muscle tissue development	-5.85854	10.0671	8.13036	23250	149	124	8	6.45161	2.20618	1499|2475|2931|4851|5300|5562|10891|28514	CTNNB1|MTOR|GSK3A|NOTCH1|PIN1|PRKAA1|PPARGC1A|DLL1	-4.64719
Input ID	Canonical Pathways	11	M101	PID HDAC CLASSI PATHWAY	-5.84614	17.0455	9.55856	23250	66	124	6	4.83871	1.92701	5468|5566|7124|10013|23410|23411	PPARG|PRKACA|TNF|HDAC6|SIRT3|SIRT1	-4.63514
Input ID	GO Biological Processes	19	GO:0003300	cardiac muscle hypertrophy	-5.84392	12.6202	8.6967	23250	104	124	7	5.64516	2.07257	488|2475|2931|4000|4851|5300|8678	ATP2A2|MTOR|GSK3A|LMNA|NOTCH1|PIN1|BECN1	-4.63395
Input ID	GO Biological Processes	19	GO:0002673	regulation of acute inflammatory response	-5.83666	10	8.09739	23250	150	124	8	6.45161	2.20618	3553|3569|3630|5294|5468|5743|7124|11315	IL1B|IL6|INS|PIK3CG|PPARG|PTGS2|TNF|PARK7	-4.62773
Input ID	GO Biological Processes	19	GO:0150003	regulation of spontaneous synaptic transmission	-5.83292	112.5	18.2582	23250	5	124	3	2.41935	1.37981	177|351|5071	AGER|APP|PRKN	-4.62535
Input ID	GO Biological Processes	19	GO:0032886	regulation of microtubule-based process	-5.83156	8.31281	7.6628	23250	203	124	9	7.25806	2.3299	672|1499|2932|4137|5562|6622|9638|10013|10519	BRCA1|CTNNB1|GSK3B|MAPT|PRKAA1|SNCA|FEZ1|HDAC6|CIB1	-4.62433
Input ID	GO Biological Processes	19	GO:0033238	regulation of cellular amine metabolic process	-5.82023	25.3378	10.8488	23250	37	124	5	4.03226	1.76655	3630|5037|5071|6622|11315	INS|PEBP1|PRKN|SNCA|PARK7	-4.61368
Input ID	GO Biological Processes	19	GO:0099173	postsynapse organization	-5.81586	12.5	8.64822	23250	105	124	7	5.64516	2.07257	348|3480|3630|3643|5621|10013|80823	APOE|IGF1R|INS|INSR|PRNP|HDAC6|BHLHB9	-4.61034
Input ID	GO Biological Processes	19	GO:2001237	negative regulation of extrinsic apoptotic signaling pathway	-5.81586	12.5	8.64822	23250	105	124	7	5.64516	2.07257	672|2537|3552|3553|4000|7124|11315	BRCA1|IFI6|IL1A|IL1B|LMNA|TNF|PARK7	-4.61034
Input ID	Canonical Pathways	11	M164	PID ERBB1 DOWNSTREAM PATHWAY	-5.81586	12.5	8.64822	23250	105	124	7	5.64516	2.07257	1386|1950|1956|2475|3845|5037|6654	ATF2|EGF|EGFR|MTOR|KRAS|PEBP1|SOS1	-4.61034
Input ID	GO Biological Processes	19	GO:0090276	regulation of peptide hormone secretion	-5.8139	8.27206	7.63902	23250	204	124	9	7.25806	2.3299	846|1956|3553|3630|4826|5071|7124|7351|23410	CASR|EGFR|IL1B|INS|NNAT|PRKN|TNF|UCP2|SIRT3	-4.60871
Input ID	GO Biological Processes	19	GO:0051881	regulation of mitochondrial membrane potential	-5.80728	16.791	9.47821	23250	67	124	6	4.83871	1.92701	2537|4137|5071|6647|7351|11315	IFI6|MAPT|PRKN|SOD1|UCP2|PARK7	-4.60278
Input ID	GO Biological Processes	19	GO:0016999	antibiotic metabolic process	-5.79339	9.86842	8.03237	23250	152	124	8	6.45161	2.20618	217|1956|4314|6622|6647|8574|10013|11315	ALDH2|EGFR|MMP3|SNCA|SOD1|AKR7A2|HDAC6|PARK7	-4.59025
Input ID	GO Biological Processes	19	GO:0014897	striated muscle hypertrophy	-5.7881	12.3821	8.60039	23250	106	124	7	5.64516	2.07257	488|2475|2931|4000|4851|5300|8678	ATP2A2|MTOR|GSK3A|LMNA|NOTCH1|PIN1|BECN1	-4.58538
Input ID	GO Biological Processes	19	GO:0046883	regulation of hormone secretion	-5.78785	7.07547	7.28356	23250	265	124	10	8.06452	2.44523	151|846|1956|3553|3630|4826|5071|7124|7351|23410	ADRA2B|CASR|EGFR|IL1B|INS|NNAT|PRKN|TNF|UCP2|SIRT3	-4.58538
Input ID	GO Biological Processes	19	GO:0007254	JNK cascade	-5.77887	8.19175	7.59192	23250	206	124	9	7.25806	2.3299	177|351|846|1956|3146|3480|3553|5071|7124	AGER|APP|CASR|EGFR|HMGB1|IGF1R|IL1B|PRKN|TNF	-4.5779
Input ID	GO Biological Processes	19	GO:0042129	regulation of T cell proliferation	-5.77199	9.80392	8.00031	23250	153	124	8	6.45161	2.20618	177|1499|3146|3553|3569|5074|5621|6654	AGER|CTNNB1|HMGB1|IL1B|IL6|PAWR|PRNP|SOS1	-4.57222
Input ID	KEGG Pathway	24	hsa04921	Oxytocin signaling pathway	-5.77199	9.80392	8.00031	23250	153	124	8	6.45161	2.20618	1827|1956|3845|5294|5534|5562|5566|5743	RCAN1|EGFR|KRAS|PIK3CG|PPP3R1|PRKAA1|PRKACA|PTGS2	-4.57222
Input ID	Canonical Pathways	11	M105	PID TELOMERASE PATHWAY	-5.76905	16.5441	9.39957	23250	68	124	6	4.83871	1.92701	1950|1956|2099|2475|3320|7490	EGF|EGFR|ESR1|MTOR|HSP90AA1|WT1	-4.57101
Input ID	GO Biological Processes	19	GO:0030521	androgen receptor signaling pathway	-5.76905	16.5441	9.39957	23250	68	124	6	4.83871	1.92701	672|1499|10013|10891|11315|23411	BRCA1|CTNNB1|HDAC6|PPARGC1A|PARK7|SIRT1	-4.57101
Input ID	GO Biological Processes	19	GO:0042116	macrophage activation	-5.76905	16.5441	9.39957	23250	68	124	6	4.83871	1.92701	177|351|3146|4137|6622|7099	AGER|APP|HMGB1|MAPT|SNCA|TLR4	-4.57101
Input ID	GO Biological Processes	19	GO:0033077	T cell differentiation in thymus	-5.76905	16.5441	9.39957	23250	68	124	6	4.83871	1.92701	1499|3553|6647|6654|6868|7471	CTNNB1|IL1B|SOD1|SOS1|ADAM17|WNT1	-4.57101
Input ID	Canonical Pathways	11	M229	PID P38 ALPHA BETA DOWNSTREAM PATHWAY	-5.76081	24.6711	10.6934	23250	38	124	5	4.03226	1.76655	1386|2099|5743|7157|10891	ATF2|ESR1|PTGS2|TP53|PPARGC1A	-4.56538
Input ID	GO Biological Processes	19	GO:0010907	positive regulation of glucose metabolic process	-5.76081	24.6711	10.6934	23250	38	124	5	4.03226	1.76655	3146|3630|3643|5465|10891	HMGB1|INS|INSR|PPARA|PPARGC1A	-4.56538
Input ID	GO Biological Processes	19	GO:0006110	regulation of glycolytic process	-5.76081	24.6711	10.6934	23250	38	124	5	4.03226	1.76655	3630|3643|5465|5562|10891	INS|INSR|PPARA|PRKAA1|PPARGC1A	-4.56538
Input ID	GO Biological Processes	19	GO:0071867	response to monoamine	-5.76081	24.6711	10.6934	23250	38	124	5	4.03226	1.76655	351|5071|5566|6622|10891	APP|PRKN|PRKACA|SNCA|PPARGC1A	-4.56538
Input ID	GO Biological Processes	19	GO:0071869	response to catecholamine	-5.76081	24.6711	10.6934	23250	38	124	5	4.03226	1.76655	351|5071|5566|6622|10891	APP|PRKN|PRKACA|SNCA|PPARGC1A	-4.56538
Input ID	GO Biological Processes	19	GO:0030811	regulation of nucleotide catabolic process	-5.76081	24.6711	10.6934	23250	38	124	5	4.03226	1.76655	3630|3643|5465|5562|10891	INS|INSR|PPARA|PRKAA1|PPARGC1A	-4.56538
Input ID	GO Biological Processes	19	GO:2000774	positive regulation of cellular senescence	-5.75988	44.1176	13.0224	23250	17	124	4	3.22581	1.58668	1029|3845|5074|23411	CDKN2A|KRAS|PAWR|SIRT1	-4.56478
Input ID	GO Biological Processes	19	GO:0046394	carboxylic acid biosynthetic process	-5.74954	5.56931	6.7842	23250	404	124	12	9.67742	2.65502	341|672|1950|3553|3630|3643|5465|5562|5743|10891|11315|23411	APOC1|BRCA1|EGF|IL1B|INS|INSR|PPARA|PRKAA1|PTGS2|PPARGC1A|PARK7|SIRT1	-4.55676
Input ID	GO Biological Processes	19	GO:0016053	organic acid biosynthetic process	-5.73842	5.55556	6.7723	23250	405	124	12	9.67742	2.65502	341|672|1950|3553|3630|3643|5465|5562|5743|10891|11315|23411	APOC1|BRCA1|EGF|IL1B|INS|INSR|PPARA|PRKAA1|PTGS2|PPARGC1A|PARK7|SIRT1	-4.5463
Input ID	GO Biological Processes	19	GO:0005976	polysaccharide metabolic process	-5.73344	12.1528	8.50662	23250	108	124	7	5.64516	2.07257	1950|2475|2931|2932|3146|3630|3643	EGF|MTOR|GSK3A|GSK3B|HMGB1|INS|INSR	-4.54231
Input ID	GO Biological Processes	19	GO:0006304	DNA modification	-5.73344	12.1528	8.50662	23250	108	124	7	5.64516	2.07257	328|672|1788|1789|2931|4968|51008	APEX1|BRCA1|DNMT3A|DNMT3B|GSK3A|OGG1|ASCC1	-4.54231
Input ID	GO Biological Processes	19	GO:0014896	muscle hypertrophy	-5.73344	12.1528	8.50662	23250	108	124	7	5.64516	2.07257	488|2475|2931|4000|4851|5300|8678	ATP2A2|MTOR|GSK3A|LMNA|NOTCH1|PIN1|BECN1	-4.54231
Input ID	GO Biological Processes	19	GO:0006801	superoxide metabolic process	-5.73143	16.3043	9.32258	23250	69	124	6	4.83871	1.92701	1956|4137|6647|7124|9644|11315	EGFR|MAPT|SOD1|TNF|SH3PXD2A|PARK7	-4.54129
Input ID	Canonical Pathways	11	M153	PID P75 NTR PATHWAY	-5.73143	16.3043	9.32258	23250	69	124	6	4.83871	1.92701	351|4314|5663|6868|7157|8878	APP|MMP3|PSEN1|ADAM17|TP53|SQSTM1	-4.54129
Input ID	KEGG Pathway	24	hsa05218	Melanoma	-5.73143	16.3043	9.32258	23250	69	124	6	4.83871	1.92701	1029|1950|1956|3480|3845|7157	CDKN2A|EGF|EGFR|IGF1R|KRAS|TP53	-4.54129
Input ID	Reactome Gene Sets	6	R-HSA-168898	Toll-Like Receptors Cascades	-5.72966	9.67742	7.93707	23250	155	124	8	6.45161	2.20618	177|338|351|1386|3146|6279|6280|7099	AGER|APOB|APP|ATF2|HMGB1|S100A8|S100A9|TLR4	-4.53985
Input ID	GO Biological Processes	19	GO:0051048	negative regulation of secretion	-5.70995	8.03571	7.49962	23250	210	124	9	7.25806	2.3299	151|1950|3553|3630|4851|5071|6622|7124|7351	ADRA2B|EGF|IL1B|INS|NOTCH1|PRKN|SNCA|TNF|UCP2	-4.5221
Input ID	KEGG Pathway	24	hsa04917	Prolactin signaling pathway	-5.6944	16.0714	9.24718	23250	70	124	6	4.83871	1.92701	2099|2100|2932|3630|3845|6654	ESR1|ESR2|GSK3B|INS|KRAS|SOS1	-4.51046
Input ID	Canonical Pathways	11	M167	PID AP1 PATHWAY	-5.6944	16.0714	9.24718	23250	70	124	6	4.83871	1.92701	1029|1386|1499|2099|3569|7157	CDKN2A|ATF2|CTNNB1|ESR1|IL6|TP53	-4.51046
Input ID	GO Biological Processes	19	GO:1900371	regulation of purine nucleotide biosynthetic process	-5.6944	16.0714	9.24718	23250	70	124	6	4.83871	1.92701	3630|3643|5465|5562|6622|10891	INS|INSR|PPARA|PRKAA1|SNCA|PPARGC1A	-4.51046
Input ID	GO Biological Processes	19	GO:0017038	protein import	-5.69295	7.99763	7.47693	23250	211	124	9	7.25806	2.3299	348|3320|4000|5534|5663|5743|7124|9531|23411	APOE|HSP90AA1|LMNA|PPP3R1|PSEN1|PTGS2|TNF|BAG3|SIRT1	-4.50998
Input ID	GO Biological Processes	19	GO:0030595	leukocyte chemotaxis	-5.69295	7.99763	7.47693	23250	211	124	9	7.25806	2.3299	102|1234|3146|3553|3569|5294|6279|6280|6868	ADAM10|CCR5|HMGB1|IL1B|IL6|PIK3CG|S100A8|S100A9|ADAM17	-4.50998
Input ID	GO Biological Processes	19	GO:0043535	regulation of blood vessel endothelial cell migration	-5.6673	9.49367	7.84433	23250	158	124	8	6.45161	2.20618	348|3146|4851|5468|5743|6868|10519|23411	APOE|HMGB1|NOTCH1|PPARG|PTGS2|ADAM17|CIB1|SIRT1	-4.48722
Input ID	GO Biological Processes	19	GO:0035051	cardiocyte differentiation	-5.6673	9.49367	7.84433	23250	158	124	8	6.45161	2.20618	1956|2475|2931|4000|4851|5300|7490|28514	EGFR|MTOR|GSK3A|LMNA|NOTCH1|PIN1|WT1|DLL1	-4.48722
Input ID	GO Biological Processes	19	GO:1903747	regulation of establishment of protein localization to mitochondrion	-5.65794	15.8451	9.17333	23250	71	124	6	4.83871	1.92701	2931|4137|5071|5562|7157|9531	GSK3A|MAPT|PRKN|PRKAA1|TP53|BAG3	-4.48122
Input ID	GO Biological Processes	19	GO:0030808	regulation of nucleotide biosynthetic process	-5.65794	15.8451	9.17333	23250	71	124	6	4.83871	1.92701	3630|3643|5465|5562|6622|10891	INS|INSR|PPARA|PRKAA1|SNCA|PPARGC1A	-4.48122
Input ID	GO Biological Processes	19	GO:0048511	rhythmic process	-5.65778	6.84307	7.12429	23250	274	124	10	8.06452	2.44523	1956|2099|2932|5465|5468|5562|7157|10891|23411|57805	EGFR|ESR1|GSK3B|PPARA|PPARG|PRKAA1|TP53|PPARGC1A|SIRT1|CCAR2	-4.48122
Input ID	GO Biological Processes	19	GO:1903522	regulation of blood circulation	-5.65778	6.84307	7.12429	23250	274	124	10	8.06452	2.44523	151|274|488|846|1956|2931|5037|5294|5566|5743	ADRA2B|BIN1|ATP2A2|CASR|EGFR|GSK3A|PEBP1|PIK3CG|PRKACA|PTGS2	-4.48122
Input ID	GO Biological Processes	19	GO:0071605	monocyte chemotactic protein-1 production	-5.65253	41.6667	12.6385	23250	18	124	4	3.22581	1.58668	177|3146|3552|3553	AGER|HMGB1|IL1A|IL1B	-4.47914
Input ID	GO Biological Processes	19	GO:0071637	regulation of monocyte chemotactic protein-1 production	-5.65253	41.6667	12.6385	23250	18	124	4	3.22581	1.58668	177|3146|3552|3553	AGER|HMGB1|IL1A|IL1B	-4.47914
Input ID	Reactome Gene Sets	6	R-HSA-881907	Gastrin-CREB signalling pathway via PKC and MAPK	-5.65253	41.6667	12.6385	23250	18	124	4	3.22581	1.58668	1956|3845|4314|6654	EGFR|KRAS|MMP3|SOS1	-4.47914
Input ID	GO Biological Processes	19	GO:0010888	negative regulation of lipid storage	-5.65253	41.6667	12.6385	23250	18	124	4	3.22581	1.58668	3569|5465|5468|7124	IL6|PPARA|PPARG|TNF	-4.47914
Input ID	Reactome Gene Sets	6	R-HSA-8963898	Plasma lipoprotein assembly	-5.65253	41.6667	12.6385	23250	18	124	4	3.22581	1.58668	338|341|348|5566	APOB|APOC1|APOE|PRKACA	-4.47914
Input ID	GO Biological Processes	19	GO:1903204	negative regulation of oxidative stress-induced neuron death	-5.65253	41.6667	12.6385	23250	18	124	4	3.22581	1.58668	1499|5071|7471|11315	CTNNB1|PRKN|WNT1|PARK7	-4.47914
Input ID	Canonical Pathways	11	M176	PID FOXM1 PATHWAY	-5.64693	23.4375	10.3999	23250	40	124	5	4.03226	1.76655	1029|2099|2931|4313|7515	CDKN2A|ESR1|GSK3A|MMP2|XRCC1	-4.47449
Input ID	GO Biological Processes	19	GO:0001659	temperature homeostasis	-5.64693	23.4375	10.3999	23250	40	124	5	4.03226	1.76655	3552|3553|5743|7124|10891	IL1A|IL1B|PTGS2|TNF|PPARGC1A	-4.47449
Input ID	GO Biological Processes	19	GO:0097435	supramolecular fiber organization	-5.63622	4.28082	6.24656	23250	657	124	15	12.0968	2.92837	274|348|351|1410|2475|4137|5071|5074|5300|5663|6622|10013|10519|11217|11315	BIN1|APOE|APP|CRYAB|MTOR|MAPT|PRKN|PAWR|PIN1|PSEN1|SNCA|HDAC6|CIB1|AKAP2|PARK7	-4.46472
Input ID	GO Biological Processes	19	GO:0051345	positive regulation of hydrolase activity	-5.63382	4.02145	6.14211	23250	746	124	16	12.9032	3.0105	351|846|1956|2099|2475|2932|3146|4137|5300|5468|6279|6280|6622|6654|7124|23411	APP|CASR|EGFR|ESR1|MTOR|GSK3B|HMGB1|MAPT|PIN1|PPARG|S100A8|S100A9|SNCA|SOS1|TNF|SIRT1	-4.46389
Input ID	GO Biological Processes	19	GO:0072657	protein localization to membrane	-5.62755	4.58115	6.3558	23250	573	124	14	11.2903	2.84202	177|348|682|1956|3320|3630|3921|4035|5071|5621|7124|7157|8878|10519	AGER|APOE|BSG|EGFR|HSP90AA1|INS|RPSA|LRP1|PRKN|PRNP|TNF|TP53|SQSTM1|CIB1	-4.45857
Input ID	GO Biological Processes	19	GO:0050805	negative regulation of synaptic transmission	-5.62204	15.625	9.10095	23250	72	124	6	4.83871	1.92701	177|3553|4137|5071|5743|6622	AGER|IL1B|MAPT|PRKN|PTGS2|SNCA	-4.45431
Input ID	GO Biological Processes	19	GO:0000271	polysaccharide biosynthetic process	-5.62204	15.625	9.10095	23250	72	124	6	4.83871	1.92701	1950|2475|2931|2932|3630|3643	EGF|MTOR|GSK3A|GSK3B|INS|INSR	-4.45431
Input ID	GO Biological Processes	19	GO:1905475	regulation of protein localization to membrane	-5.60624	9.31677	7.75404	23250	161	124	8	6.45161	2.20618	1956|3630|4035|5071|5621|7157|8878|10519	EGFR|INS|LRP1|PRKN|PRNP|TP53|SQSTM1|CIB1	-4.43882
Input ID	GO Biological Processes	19	GO:0044403	symbiont process	-5.5966	3.99467	6.10873	23250	751	124	16	12.9032	3.0105	274|348|1234|1499|1956|3416|3643|3921|4851|5071|6895|7124|7157|8678|8878|23411	BIN1|APOE|CCR5|CTNNB1|EGFR|IDE|INSR|RPSA|NOTCH1|PRKN|TARBP2|TNF|TP53|BECN1|SQSTM1|SIRT1	-4.43105
Input ID	GO Biological Processes	19	GO:0050873	brown fat cell differentiation	-5.5923	22.8659	10.2611	23250	41	124	5	4.03226	1.76655	2475|3630|5743|10891|23411	MTOR|INS|PTGS2|PPARGC1A|SIRT1	-4.42706
Input ID	GO Biological Processes	19	GO:0005977	glycogen metabolic process	-5.58668	15.411	9.03001	23250	73	124	6	4.83871	1.92701	2475|2931|2932|3146|3630|3643	MTOR|GSK3A|GSK3B|HMGB1|INS|INSR	-4.42267
Input ID	GO Biological Processes	19	GO:0010611	regulation of cardiac muscle hypertrophy	-5.58668	15.411	9.03001	23250	73	124	6	4.83871	1.92701	2475|2931|4000|4851|5300|8678	MTOR|GSK3A|LMNA|NOTCH1|PIN1|BECN1	-4.42267
Input ID	Canonical Pathways	11	M5885	NABA MATRISOME ASSOCIATED	-5.58181	3.98406	6.09545	23250	753	124	16	12.9032	3.0105	102|1510|1950|3552|3553|3569|3630|4313|4314|5654|6279|6280|6868|7124|7471|8038	ADAM10|CTSE|EGF|IL1A|IL1B|IL6|INS|MMP2|MMP3|HTRA1|S100A8|S100A9|ADAM17|TNF|WNT1|ADAM12	-4.41904
Input ID	GO Biological Processes	19	GO:0042445	hormone metabolic process	-5.57648	7.74083	7.32214	23250	218	124	9	7.25806	2.3299	2099|3416|3553|5037|5653|7124|10273|10891|25825	ESR1|IDE|IL1B|PEBP1|KLK6|TNF|STUB1|PPARGC1A|BACE2	-4.41526
Input ID	GO Biological Processes	19	GO:0017015	regulation of transforming growth factor beta receptor signaling pathway	-5.5759	11.5132	8.23956	23250	114	124	7	5.64516	2.07257	1030|5300|5654|6868|7471|10273|23411	CDKN2B|PIN1|HTRA1|ADAM17|WNT1|STUB1|SIRT1	-4.41526
Input ID	GO Biological Processes	19	GO:0072330	monocarboxylic acid biosynthetic process	-5.57378	6.69643	7.02205	23250	280	124	10	8.06452	2.44523	341|672|3630|3643|5465|5562|5743|10891|11315|23411	APOC1|BRCA1|INS|INSR|PPARA|PRKAA1|PTGS2|PPARGC1A|PARK7|SIRT1	-4.41347
Input ID	GO Biological Processes	19	GO:0016358	dendrite development	-5.56019	7.70548	7.30059	23250	219	124	9	7.25806	2.3299	348|351|2475|2931|2932|5663|5802|10013|80823	APOE|APP|MTOR|GSK3A|GSK3B|PSEN1|PTPRS|HDAC6|BHLHB9	-4.40151
Input ID	GO Biological Processes	19	GO:0010632	regulation of epithelial cell migration	-5.55998	6.6726	7.0053	23250	281	124	10	8.06452	2.44523	348|2475|3146|4851|5468|5743|6868|10013|10519|23411	APOE|MTOR|HMGB1|NOTCH1|PPARG|PTGS2|ADAM17|HDAC6|CIB1|SIRT1	-4.40151
Input ID	GO Biological Processes	19	GO:0044042	glucan metabolic process	-5.55184	15.2027	8.96046	23250	74	124	6	4.83871	1.92701	2475|2931|2932|3146|3630|3643	MTOR|GSK3A|GSK3B|HMGB1|INS|INSR	-4.39501
Input ID	GO Biological Processes	19	GO:0006073	cellular glucan metabolic process	-5.55184	15.2027	8.96046	23250	74	124	6	4.83871	1.92701	2475|2931|2932|3146|3630|3643	MTOR|GSK3A|GSK3B|HMGB1|INS|INSR	-4.39501
Input ID	GO Biological Processes	19	GO:0051195	negative regulation of cofactor metabolic process	-5.55166	39.4737	12.2848	23250	19	124	4	3.22581	1.58668	4314|5465|10013|10891	MMP3|PPARA|HDAC6|PPARGC1A	-4.39501
Input ID	GO Biological Processes	19	GO:0031649	heat generation	-5.55166	39.4737	12.2848	23250	19	124	4	3.22581	1.58668	3552|3553|5743|7124	IL1A|IL1B|PTGS2|TNF	-4.39501
Input ID	GO Biological Processes	19	GO:1905477	positive regulation of protein localization to membrane	-5.55054	11.413	8.19699	23250	115	124	7	5.64516	2.07257	1956|4035|5071|5621|7157|8878|10519	EGFR|LRP1|PRKN|PRNP|TP53|SQSTM1|CIB1	-4.3942
Input ID	GO Biological Processes	19	GO:0009743	response to carbohydrate	-5.52786	7.63575	7.2579	23250	221	124	9	7.25806	2.3299	177|338|846|3553|5562|5566|5743|7351|10891	AGER|APOB|CASR|IL1B|PRKAA1|PRKACA|PTGS2|UCP2|PPARGC1A	-4.37304
Input ID	GO Biological Processes	19	GO:1903844	regulation of cellular response to transforming growth factor beta stimulus	-5.52542	11.3147	8.15495	23250	116	124	7	5.64516	2.07257	1030|5300|5654|6868|7471|10273|23411	CDKN2B|PIN1|HTRA1|ADAM17|WNT1|STUB1|SIRT1	-4.37211
Input ID	GO Biological Processes	19	GO:0030522	intracellular receptor signaling pathway	-5.51893	6.60211	6.95554	23250	284	124	10	8.06452	2.44523	672|1499|2099|2100|5465|5468|10013|10891|11315|23411	BRCA1|CTNNB1|ESR1|ESR2|PPARA|PPARG|HDAC6|PPARGC1A|PARK7|SIRT1	-4.36653
Input ID	GO Biological Processes	19	GO:0014743	regulation of muscle hypertrophy	-5.51752	15	8.89225	23250	75	124	6	4.83871	1.92701	2475|2931|4000|4851|5300|8678	MTOR|GSK3A|LMNA|NOTCH1|PIN1|BECN1	-4.36541
Input ID	GO Biological Processes	19	GO:0007276	gamete generation	-5.51667	4.18527	6.13551	23250	672	124	15	12.0968	2.92837	338|1499|1788|2475|3553|4851|5037|5566|5743|6647|6654|6895|7490|10519|23411	APOB|CTNNB1|DNMT3A|MTOR|IL1B|NOTCH1|PEBP1|PRKACA|PTGS2|SOD1|SOS1|TARBP2|WT1|CIB1|SIRT1	-4.36486
Input ID	GO Biological Processes	19	GO:0019941	modification-dependent protein catabolic process	-5.51483	4.47952	6.24688	23250	586	124	14	11.2903	2.84202	1950|2931|2932|5071|5663|7345|7471|8878|10013|10269|10273|11315|23411|57805	EGF|GSK3A|GSK3B|PRKN|PSEN1|UCHL1|WNT1|SQSTM1|HDAC6|ZMPSTE24|STUB1|PARK7|SIRT1|CCAR2	-4.36333
Input ID	GO Biological Processes	19	GO:0009617	response to bacterium	-5.50629	4.47189	6.23863	23250	587	124	14	11.2903	2.84202	338|488|1234|3553|3569|4851|5743|6279|6280|6622|6868|7099|7124|10891	APOB|ATP2A2|CCR5|IL1B|IL6|NOTCH1|PTGS2|S100A8|S100A9|SNCA|ADAM17|TLR4|TNF|PPARGC1A	-4.35569
Input ID	Canonical Pathways	11	M91	PID TCPTP PATHWAY	-5.48727	21.8023	9.99768	23250	43	124	5	4.03226	1.76655	1950|1956|3630|3643|6654	EGF|EGFR|INS|INSR|SOS1	-4.33787
Input ID	GO Biological Processes	19	GO:0043954	cellular component maintenance	-5.48727	21.8023	9.99768	23250	43	124	5	4.03226	1.76655	348|3480|3630|3643|5621	APOE|IGF1R|INS|INSR|PRNP	-4.33787
Input ID	GO Biological Processes	19	GO:0022617	extracellular matrix disassembly	-5.48369	14.8026	8.82533	23250	76	124	6	4.83871	1.92701	102|682|4035|4313|4314|5654	ADAM10|BSG|LRP1|MMP2|MMP3|HTRA1	-4.33458
Input ID	GO Biological Processes	19	GO:0060326	cell chemotaxis	-5.47838	6.5331	6.9065	23250	287	124	10	8.06452	2.44523	102|1234|3146|3553|3569|4851|5294|6279|6280|6868	ADAM10|CCR5|HMGB1|IL1B|IL6|NOTCH1|PIK3CG|S100A8|S100A9|ADAM17	-4.33017
Input ID	GO Biological Processes	19	GO:0010950	positive regulation of endopeptidase activity	-5.4686	8.92857	7.55224	23250	168	124	8	6.45161	2.20618	3146|4137|5468|6279|6280|6622|7124|23411	HMGB1|MAPT|PPARG|S100A8|S100A9|SNCA|TNF|SIRT1	-4.32217
Input ID	GO Biological Processes	19	GO:0010951	negative regulation of endopeptidase activity	-5.4642	7.5	7.1741	23250	225	124	9	7.25806	2.3299	274|351|1410|1718|2537|5037|5743|6622|11315	BIN1|APP|CRYAB|DHCR24|IFI6|PEBP1|PTGS2|SNCA|PARK7	-4.31807
Input ID	GO Biological Processes	19	GO:0010829	negative regulation of glucose transmembrane transport	-5.45654	37.5	11.9577	23250	20	124	4	3.22581	1.58668	2931|3553|5562|7124	GSK3A|IL1B|PRKAA1|TNF	-4.31337
Input ID	GO Biological Processes	19	GO:1902176	negative regulation of oxidative stress-induced intrinsic apoptotic signaling pathway	-5.45654	37.5	11.9577	23250	20	124	4	3.22581	1.58668	3630|5071|11315|23411	INS|PRKN|PARK7|SIRT1	-4.31337
Input ID	GO Biological Processes	19	GO:0031293	membrane protein intracellular domain proteolysis	-5.45654	37.5	11.9577	23250	20	124	4	3.22581	1.58668	102|5663|5664|6868	ADAM10|PSEN1|PSEN2|ADAM17	-4.31337
Input ID	GO Biological Processes	19	GO:0000423	mitophagy	-5.45654	37.5	11.9577	23250	20	124	4	3.22581	1.58668	5071|8678|8878|10013	PRKN|BECN1|SQSTM1|HDAC6	-4.31337
Input ID	GO Biological Processes	19	GO:0098780	response to mitochondrial depolarisation	-5.45654	37.5	11.9577	23250	20	124	4	3.22581	1.58668	5071|8678|8878|10013	PRKN|BECN1|SQSTM1|HDAC6	-4.31337
Input ID	GO Biological Processes	19	GO:0006925	inflammatory cell apoptotic process	-5.45654	37.5	11.9577	23250	20	124	4	3.22581	1.58668	1029|1234|3569|23411	CDKN2A|CCR5|IL6|SIRT1	-4.31337
Input ID	GO Biological Processes	19	GO:0031016	pancreas development	-5.45034	14.6104	8.75967	23250	77	124	6	4.83871	1.92701	1499|2931|2932|3569|3643|28514	CTNNB1|GSK3A|GSK3B|IL6|INSR|DLL1	-4.30806
Input ID	GO Biological Processes	19	GO:0030512	negative regulation of transforming growth factor beta receptor signaling pathway	-5.45034	14.6104	8.75967	23250	77	124	6	4.83871	1.92701	5300|5654|6868|7471|10273|23411	PIN1|HTRA1|ADAM17|WNT1|STUB1|SIRT1	-4.30806
Input ID	GO Biological Processes	19	GO:0002685	regulation of leukocyte migration	-5.44946	8.87574	7.52437	23250	169	124	8	6.45161	2.20618	102|351|3146|3552|3553|3569|6868|7124	ADAM10|APP|HMGB1|IL1A|IL1B|IL6|ADAM17|TNF	-4.30776
Input ID	GO Biological Processes	19	GO:2001235	positive regulation of apoptotic signaling pathway	-5.44946	8.87574	7.52437	23250	169	124	8	6.45161	2.20618	2931|2932|6279|6280|6647|7157|11315|23411	GSK3A|GSK3B|S100A8|S100A9|SOD1|TP53|PARK7|SIRT1	-4.30776
Input ID	GO Biological Processes	19	GO:0032872	regulation of stress-activated MAPK cascade	-5.44848	7.46681	7.15347	23250	226	124	9	7.25806	2.3299	177|351|1956|3146|3480|3553|4077|5071|7124	AGER|APP|EGFR|HMGB1|IGF1R|IL1B|NBR1|PRKN|TNF	-4.30737
Input ID	Canonical Pathways	11	M285	PID HNF3A PATHWAY	-5.43673	21.3068	9.87258	23250	44	124	5	4.03226	1.76655	338|672|2099|3630|6647	APOB|BRCA1|ESR1|INS|SOD1	-4.29738
Input ID	GO Biological Processes	19	GO:0070302	regulation of stress-activated protein kinase signaling cascade	-5.43285	7.43392	7.13297	23250	227	124	9	7.25806	2.3299	177|351|1956|3146|3480|3553|4077|5071|7124	AGER|APP|EGFR|HMGB1|IGF1R|IL1B|NBR1|PRKN|TNF	-4.29408
Input ID	GO Biological Processes	19	GO:0043632	modification-dependent macromolecule catabolic process	-5.43022	4.40436	6.16523	23250	596	124	14	11.2903	2.84202	1950|2931|2932|5071|5663|7345|7471|8878|10013|10269|10273|11315|23411|57805	EGF|GSK3A|GSK3B|PRKN|PSEN1|UCHL1|WNT1|SQSTM1|HDAC6|ZMPSTE24|STUB1|PARK7|SIRT1|CCAR2	-4.29174
Input ID	GO Biological Processes	19	GO:0032434	regulation of proteasomal ubiquitin-dependent protein catabolic process	-5.42727	10.9375	7.99176	23250	120	124	7	5.64516	2.07257	2931|2932|5071|5663|10273|11315|57805	GSK3A|GSK3B|PRKN|PSEN1|STUB1|PARK7|CCAR2	-4.28994
Input ID	GO Biological Processes	19	GO:0038061	NIK/NF-kappaB signaling	-5.42727	10.9375	7.99176	23250	120	124	7	5.64516	2.07257	177|351|1956|3146|3553|7099|7124	AGER|APP|EGFR|HMGB1|IL1B|TLR4|TNF	-4.28994
Input ID	GO Biological Processes	19	GO:0007409	axonogenesis	-5.41935	5.17241	6.43257	23250	435	124	12	9.67742	2.65502	348|351|2932|3320|4137|4851|5663|5802|6654|7345|9638|10013	APOE|APP|GSK3B|HSP90AA1|MAPT|NOTCH1|PSEN1|PTPRS|SOS1|UCHL1|FEZ1|HDAC6	-4.28291
Input ID	GO Biological Processes	19	GO:0090101	negative regulation of transmembrane receptor protein serine/threonine kinase signaling pathway	-5.4033	10.8471	7.95217	23250	121	124	7	5.64516	2.07257	4851|5300|5654|6868|7471|10273|23411	NOTCH1|PIN1|HTRA1|ADAM17|WNT1|STUB1|SIRT1	-4.26802
Input ID	GO Biological Processes	19	GO:0005978	glycogen biosynthetic process	-5.38743	20.8333	9.75156	23250	45	124	5	4.03226	1.76655	2475|2931|2932|3630|3643	MTOR|GSK3A|GSK3B|INS|INSR	-4.25388
Input ID	GO Biological Processes	19	GO:0009250	glucan biosynthetic process	-5.38743	20.8333	9.75156	23250	45	124	5	4.03226	1.76655	2475|2931|2932|3630|3643	MTOR|GSK3A|GSK3B|INS|INSR	-4.25388
Input ID	GO Biological Processes	19	GO:1903845	negative regulation of cellular response to transforming growth factor beta stimulus	-5.38505	14.2405	8.63194	23250	79	124	6	4.83871	1.92701	5300|5654|6868|7471|10273|23411	PIN1|HTRA1|ADAM17|WNT1|STUB1|SIRT1	-4.25323
Input ID	GO Biological Processes	19	GO:0055001	muscle cell development	-5.37417	8.67052	7.41517	23250	173	124	8	6.45161	2.20618	274|488|2475|2931|4000|4851|5300|7345	BIN1|ATP2A2|MTOR|GSK3A|LMNA|NOTCH1|PIN1|UCHL1	-4.2435
Input ID	GO Biological Processes	19	GO:0010869	regulation of receptor biosynthetic process	-5.36656	35.7143	11.6537	23250	21	124	4	3.22581	1.58668	5465|5468|10013|11315	PPARA|PPARG|HDAC6|PARK7	-4.23618
Input ID	GO Biological Processes	19	GO:0002758	innate immune response-activating signal transduction	-5.35584	7.27371	7.0323	23250	232	124	9	7.25806	2.3299	338|2099|3146|3845|5566|5802|6279|6280|7099	APOB|ESR1|HMGB1|KRAS|PRKACA|PTPRS|S100A8|S100A9|TLR4	-4.22812
Input ID	GO Biological Processes	19	GO:0061136	regulation of proteasomal protein catabolic process	-5.35565	8.62069	7.38842	23250	174	124	8	6.45161	2.20618	2931|2932|5071|5566|5663|10273|11315|57805	GSK3A|GSK3B|PRKN|PRKACA|PSEN1|STUB1|PARK7|CCAR2	-4.22812
Input ID	GO Biological Processes	19	GO:0070507	regulation of microtubule cytoskeleton organization	-5.35565	8.62069	7.38842	23250	174	124	8	6.45161	2.20618	672|1499|2932|4137|5562|6622|10013|10519	BRCA1|CTNNB1|GSK3B|MAPT|PRKAA1|SNCA|HDAC6|CIB1	-4.22812
Input ID	GO Biological Processes	19	GO:0051924	regulation of calcium ion transport	-5.34066	7.24249	7.01252	23250	233	124	9	7.25806	2.3299	274|846|1499|1950|5294|5566|5621|5743|6622	BIN1|CASR|CTNNB1|EGF|PIK3CG|PRKACA|PRNP|PTGS2|SNCA	-4.21427
Input ID	GO Biological Processes	19	GO:0030857	negative regulation of epithelial cell differentiation	-5.33931	20.3804	9.63438	23250	46	124	5	4.03226	1.76655	1499|2931|2932|4851|28514	CTNNB1|GSK3A|GSK3B|NOTCH1|DLL1	-4.21319
Input ID	GO Biological Processes	19	GO:0050921	positive regulation of chemotaxis	-5.33268	10.5847	7.83612	23250	124	124	7	5.64516	2.07257	102|177|846|3146|3553|3569|6868	ADAM10|AGER|CASR|HMGB1|IL1B|IL6|ADAM17	-4.20742
Input ID	GO Biological Processes	19	GO:0032755	positive regulation of interleukin-6 production	-5.32154	13.8889	8.50878	23250	81	124	6	4.83871	1.92701	3146|3552|3553|3569|7099|7124	HMGB1|IL1A|IL1B|IL6|TLR4|TNF	-4.19825
Input ID	GO Biological Processes	19	GO:1903533	regulation of protein targeting	-5.32154	13.8889	8.50878	23250	81	124	6	4.83871	1.92701	2931|5071|5562|5621|9531|10519	GSK3A|PRKN|PRKAA1|PRNP|BAG3|CIB1	-4.19825
Input ID	GO Biological Processes	19	GO:0042058	regulation of epidermal growth factor receptor signaling pathway	-5.32154	13.8889	8.50878	23250	81	124	6	4.83871	1.92701	351|1950|1956|5663|6654|6868	APP|EGF|EGFR|PSEN1|SOS1|ADAM17	-4.19825
Input ID	GO Biological Processes	19	GO:1904950	negative regulation of establishment of protein localization	-5.31898	8.52273	7.33555	23250	176	124	8	6.45161	2.20618	3553|3630|4137|5071|7124|7351|9531|11315	IL1B|INS|MAPT|PRKN|TNF|UCP2|BAG3|PARK7	-4.19639
Input ID	GO Biological Processes	19	GO:0034765	regulation of ion transmembrane transport	-5.31884	5.05618	6.32623	23250	445	124	12	9.67742	2.65502	274|351|823|2475|5243|5294|5566|5621|5663|6622|10891|11315	BIN1|APP|CAPN1|MTOR|ABCB1|PIK3CG|PRKACA|PRNP|PSEN1|SNCA|PPARGC1A|PARK7	-4.19639
Input ID	GO Biological Processes	19	GO:0046328	regulation of JNK cascade	-5.30081	8.47458	7.30944	23250	177	124	8	6.45161	2.20618	177|351|1956|3146|3480|3553|5071|7124	AGER|APP|EGFR|HMGB1|IGF1R|IL1B|PRKN|TNF	-4.18145
Input ID	GO Biological Processes	19	GO:0006325	chromatin organization	-5.29605	3.7831	5.83919	23250	793	124	16	12.9032	3.0105	672|1029|1386|1499|1788|1789|2099|3146|3553|5562|6622|7157|10013|10891|23410|23411	BRCA1|CDKN2A|ATF2|CTNNB1|DNMT3A|DNMT3B|ESR1|HMGB1|IL1B|PRKAA1|SNCA|TP53|HDAC6|PPARGC1A|SIRT3|SIRT1	-4.17725
Input ID	GO Biological Processes	19	GO:0045981	positive regulation of nucleotide metabolic process	-5.29231	19.9468	9.52085	23250	47	124	5	4.03226	1.76655	3630|3643|5562|10891|11315	INS|INSR|PRKAA1|PPARGC1A|PARK7	-4.17595
Input ID	GO Biological Processes	19	GO:0071825	protein-lipid complex subunit organization	-5.29231	19.9468	9.52085	23250	47	124	5	4.03226	1.76655	274|338|341|348|5566	BIN1|APOB|APOC1|APOE|PRKACA	-4.17595
Input ID	GO Biological Processes	19	GO:1900544	positive regulation of purine nucleotide metabolic process	-5.29231	19.9468	9.52085	23250	47	124	5	4.03226	1.76655	3630|3643|5562|10891|11315	INS|INSR|PRKAA1|PPARGC1A|PARK7	-4.17595
Input ID	GO Biological Processes	19	GO:0035333	Notch receptor processing, ligand-dependent	-5.29225	80.3571	15.3763	23250	7	124	3	2.41935	1.37981	102|5663|5664	ADAM10|PSEN1|PSEN2	-4.17595
Input ID	GO Biological Processes	19	GO:0070874	negative regulation of glycogen metabolic process	-5.29225	80.3571	15.3763	23250	7	124	3	2.41935	1.37981	2931|2932|3630	GSK3A|GSK3B|INS	-4.17595
Input ID	GO Biological Processes	19	GO:0098814	spontaneous synaptic transmission	-5.29225	80.3571	15.3763	23250	7	124	3	2.41935	1.37981	177|351|5071	AGER|APP|PRKN	-4.17595
Input ID	GO Biological Processes	19	GO:0031622	positive regulation of fever generation	-5.29225	80.3571	15.3763	23250	7	124	3	2.41935	1.37981	3553|5743|7124	IL1B|PTGS2|TNF	-4.17595
Input ID	GO Biological Processes	19	GO:0034983	peptidyl-lysine deacetylation	-5.29225	80.3571	15.3763	23250	7	124	3	2.41935	1.37981	10013|23410|23411	HDAC6|SIRT3|SIRT1	-4.17595
Input ID	GO Biological Processes	19	GO:0043534	blood vessel endothelial cell migration	-5.28277	8.42697	7.28352	23250	178	124	8	6.45161	2.20618	348|3146|4851|5468|5743|6868|10519|23411	APOE|HMGB1|NOTCH1|PPARG|PTGS2|ADAM17|CIB1|SIRT1	-4.16785
Input ID	GO Biological Processes	19	GO:0007088	regulation of mitotic nuclear division	-5.28277	8.42697	7.28352	23250	178	124	8	6.45161	2.20618	1950|3552|3553|3630|3643|5037|5300|8678	EGF|IL1A|IL1B|INS|INSR|PEBP1|PIN1|BECN1	-4.16785
Input ID	Reactome Gene Sets	6	R-HSA-1250196	SHC1 events in ERBB2 signaling	-5.28121	34.0909	11.3704	23250	22	124	4	3.22581	1.58668	1950|1956|3845|6654	EGF|EGFR|KRAS|SOS1	-4.16711
Input ID	Reactome Gene Sets	6	R-HSA-2979096	NOTCH2 Activation and Transmission of Signal to the Nucleus	-5.28121	34.0909	11.3704	23250	22	124	4	3.22581	1.58668	102|5663|5664|28514	ADAM10|PSEN1|PSEN2|DLL1	-4.16711
Input ID	GO Biological Processes	19	GO:0048639	positive regulation of developmental growth	-5.26483	8.37989	7.25781	23250	179	124	8	6.45161	2.20618	2475|3643|4137|4851|5071|5300|7490|28514	MTOR|INSR|MAPT|NOTCH1|PRKN|PIN1|WT1|DLL1	-4.15267
Input ID	GO Biological Processes	19	GO:0071333	cellular response to glucose stimulus	-5.26394	10.3346	7.72397	23250	127	124	7	5.64516	2.07257	177|846|3553|5562|5566|7351|10891	AGER|CASR|IL1B|PRKAA1|PRKACA|UCP2|PPARGC1A	-4.15205
Input ID	GO Biological Processes	19	GO:0031058	positive regulation of histone modification	-5.25972	13.5542	8.38989	23250	83	124	6	4.83871	1.92701	672|1499|1789|3553|10891|23411	BRCA1|CTNNB1|DNMT3B|IL1B|PPARGC1A|SIRT1	-4.14865
Input ID	GO Biological Processes	19	GO:0009416	response to light stimulus	-5.25755	6.16776	6.64123	23250	304	124	10	8.06452	2.44523	351|1956|2475|3845|4968|5562|5743|7157|23411|57805	APP|EGFR|MTOR|KRAS|OGG1|PRKAA1|PTGS2|TP53|SIRT1|CCAR2	-4.14675
Input ID	GO Biological Processes	19	GO:0010466	negative regulation of peptidase activity	-5.25116	7.06067	6.89627	23250	239	124	9	7.25806	2.3299	274|351|1410|1718|2537|5037|5743|6622|11315	BIN1|APP|CRYAB|DHCR24|IFI6|PEBP1|PTGS2|SNCA|PARK7	-4.14173
Input ID	GO Biological Processes	19	GO:0046649	lymphocyte activation	-5.25039	3.97808	5.88847	23250	707	124	15	12.0968	2.92837	177|1499|3146|3553|3569|3630|5074|5294|5621|5663|6647|6654|6868|7471|28514	AGER|CTNNB1|HMGB1|IL1B|IL6|INS|PAWR|PIK3CG|PRNP|PSEN1|SOD1|SOS1|ADAM17|WNT1|DLL1	-4.14123
Input ID	KEGG Pathway	24	hsa04330	Notch signaling pathway	-5.24639	19.5312	9.41077	23250	48	124	5	4.03226	1.76655	4851|5663|5664|6868|28514	NOTCH1|PSEN1|PSEN2|ADAM17|DLL1	-4.13777
Input ID	GO Biological Processes	19	GO:2001169	regulation of ATP biosynthetic process	-5.24639	19.5312	9.41077	23250	48	124	5	4.03226	1.76655	3630|3643|5465|5562|10891	INS|INSR|PPARA|PRKAA1|PPARGC1A	-4.13777
Input ID	GO Biological Processes	19	GO:0021537	telencephalon development	-5.2365	7.03125	6.87729	23250	240	124	9	7.25806	2.3299	1499|1956|2932|4035|5037|5663|5802|7515|9638	CTNNB1|EGFR|GSK3B|LRP1|PEBP1|PSEN1|PTPRS|XRCC1|FEZ1	-4.12892
Input ID	GO Biological Processes	19	GO:0001503	ossification	-5.23644	5.47082	6.40854	23250	377	124	11	8.87097	2.55331	846|1499|1956|3569|4077|4313|4851|5566|5743|7124|9365	CASR|CTNNB1|EGFR|IL6|NBR1|MMP2|NOTCH1|PRKACA|PTGS2|TNF|KL	-4.12892
Input ID	GO Biological Processes	19	GO:0045089	positive regulation of innate immune response	-5.23252	6.12745	6.61135	23250	306	124	10	8.06452	2.44523	338|2099|3146|3845|4313|5566|5802|6279|6280|7099	APOB|ESR1|HMGB1|KRAS|MMP2|PRKACA|PTPRS|S100A8|S100A9|TLR4	-4.12554
Input ID	GO Biological Processes	19	GO:0043154	negative regulation of cysteine-type endopeptidase activity involved in apoptotic process	-5.22942	13.3929	8.33198	23250	84	124	6	4.83871	1.92701	1410|1718|2537|5743|6622|11315	CRYAB|DHCR24|IFI6|PTGS2|SNCA|PARK7	-4.12314
Input ID	GO Biological Processes	19	GO:0006611	protein export from nucleus	-5.22931	8.28729	7.20699	23250	181	124	8	6.45161	2.20618	2932|3313|3553|3921|5566|7157|9531|11315	GSK3B|HSPA9|IL1B|RPSA|PRKACA|TP53|BAG3|PARK7	-4.12314
Input ID	GO Biological Processes	19	GO:0022898	regulation of transmembrane transporter activity	-5.2219	7.00207	6.85842	23250	241	124	9	7.25806	2.3299	351|823|3630|5243|5566|5621|6622|10891|11315	APP|CAPN1|INS|ABCB1|PRKACA|PRNP|SNCA|PPARGC1A|PARK7	-4.11627
Input ID	GO Biological Processes	19	GO:0071331	cellular response to hexose stimulus	-5.2191	10.1744	7.65126	23250	129	124	7	5.64516	2.07257	177|846|3553|5562|5566|7351|10891	AGER|CASR|IL1B|PRKAA1|PRKACA|UCP2|PPARGC1A	-4.11401
Input ID	GO Biological Processes	19	GO:0042594	response to starvation	-5.21171	8.24176	7.18187	23250	182	124	8	6.45161	2.20618	2475|5468|5562|7157|7351|8678|10891|23411	MTOR|PPARG|PRKAA1|TP53|UCP2|BECN1|PPARGC1A|SIRT1	-4.10824
Input ID	KEGG Pathway	24	hsa05144	Malaria	-5.20149	19.1327	9.30398	23250	49	124	5	4.03226	1.76655	3553|3569|4035|7099|7124	IL1B|IL6|LRP1|TLR4|TNF	-4.09883
Input ID	GO Biological Processes	19	GO:1902932	positive regulation of alcohol biosynthetic process	-5.20002	32.6087	11.1055	23250	23	124	4	3.22581	1.58668	3553|5562|6622|7124	IL1B|PRKAA1|SNCA|TNF	-4.09793
Input ID	GO Biological Processes	19	GO:0051043	regulation of membrane protein ectodomain proteolysis	-5.20002	32.6087	11.1055	23250	23	124	4	3.22581	1.58668	348|3553|4898|7124	APOE|IL1B|NRDC|TNF	-4.09793
Input ID	GO Biological Processes	19	GO:2001022	positive regulation of response to DNA damage stimulus	-5.19952	13.2353	8.27505	23250	85	124	6	4.83871	1.92701	672|1956|3146|7515|23411|57805	BRCA1|EGFR|HMGB1|XRCC1|SIRT1|CCAR2	-4.09793
Input ID	GO Biological Processes	19	GO:0071326	cellular response to monosaccharide stimulus	-5.19697	10.0962	7.6155	23250	130	124	7	5.64516	2.07257	177|846|3553|5562|5566|7351|10891	AGER|CASR|IL1B|PRKAA1|PRKACA|UCP2|PPARGC1A	-4.09565
Input ID	GO Biological Processes	19	GO:0002224	toll-like receptor signaling pathway	-5.17503	10.0191	7.58012	23250	131	124	7	5.64516	2.07257	338|2099|3146|5802|6279|6280|7099	APOB|ESR1|HMGB1|PTPRS|S100A8|S100A9|TLR4	-4.07558
Input ID	KEGG Pathway	24	hsa04012	ErbB signaling pathway	-5.16999	13.0814	8.21906	23250	86	124	6	4.83871	1.92701	1950|1956|2475|2932|3845|6654	EGF|EGFR|MTOR|GSK3B|KRAS|SOS1	-4.07214
Input ID	GO Biological Processes	19	GO:0048636	positive regulation of muscle organ development	-5.16999	13.0814	8.21906	23250	86	124	6	4.83871	1.92701	1499|2475|4851|5300|5562|28514	CTNNB1|MTOR|NOTCH1|PIN1|PRKAA1|DLL1	-4.07214
Input ID	GO Biological Processes	19	GO:0045844	positive regulation of striated muscle tissue development	-5.16999	13.0814	8.21906	23250	86	124	6	4.83871	1.92701	1499|2475|4851|5300|5562|28514	CTNNB1|MTOR|NOTCH1|PIN1|PRKAA1|DLL1	-4.07214
Input ID	GO Biological Processes	19	GO:0035966	response to topologically incorrect protein	-5.15956	8.10811	7.10765	23250	185	124	8	6.45161	2.20618	2931|3313|3316|3320|4000|5071|10013|10273	GSK3A|HSPA9|HSPB2|HSP90AA1|LMNA|PRKN|HDAC6|STUB1	-4.06277
Input ID	KEGG Pathway	24	hsa04913	Ovarian steroidogenesis	-5.15758	18.75	9.2003	23250	50	124	5	4.03226	1.76655	3480|3630|3643|5566|5743	IGF1R|INS|INSR|PRKACA|PTGS2	-4.06132
Input ID	GO Biological Processes	19	GO:0002437	inflammatory response to antigenic stimulus	-5.15758	18.75	9.2003	23250	50	124	5	4.03226	1.76655	3146|3553|4851|7124|11315	HMGB1|IL1B|NOTCH1|TNF|PARK7	-4.06132
Input ID	GO Biological Processes	19	GO:0055076	transition metal ion homeostasis	-5.15327	9.94318	7.54513	23250	132	124	7	5.64516	2.07257	351|5071|5621|6279|6280|6647|9429	APP|PRKN|PRNP|S100A8|S100A9|SOD1|ABCG2	-4.05754
Input ID	GO Biological Processes	19	GO:0001818	negative regulation of cytokine production	-5.14996	6.85976	6.76563	23250	246	124	9	7.25806	2.3299	177|3146|3569|5300|5621|5802|7099|7124|28514	AGER|HMGB1|IL6|PIN1|PRNP|PTPRS|TLR4|TNF|DLL1	-4.05448
Input ID	GO Biological Processes	19	GO:0031099	regeneration	-5.14239	8.06452	7.08328	23250	186	124	8	6.45161	2.20618	348|1956|4851|5468|5653|5802|7351|7471	APOE|EGFR|NOTCH1|PPARG|KLK6|PTPRS|UCP2|WNT1	-4.04843
Input ID	GO Biological Processes	19	GO:1903531	negative regulation of secretion by cell	-5.14239	8.06452	7.08328	23250	186	124	8	6.45161	2.20618	151|3553|3630|4851|5071|6622|7124|7351	ADRA2B|IL1B|INS|NOTCH1|PRKN|SNCA|TNF|UCP2	-4.04843
Input ID	GO Biological Processes	19	GO:1903076	regulation of protein localization to plasma membrane	-5.14084	12.931	8.164	23250	87	124	6	4.83871	1.92701	1956|3630|4035|5621|8878|10519	EGFR|INS|LRP1|PRNP|SQSTM1|CIB1	-4.04774
Input ID	GO Biological Processes	19	GO:0010827	regulation of glucose transmembrane transport	-5.14084	12.931	8.164	23250	87	124	6	4.83871	1.92701	2931|3553|3630|3643|5562|7124	GSK3A|IL1B|INS|INSR|PRKAA1|TNF	-4.04774
Input ID	GO Biological Processes	19	GO:0006919	activation of cysteine-type endopeptidase activity involved in apoptotic process	-5.14084	12.931	8.164	23250	87	124	6	4.83871	1.92701	4137|5468|6279|6280|6622|7124	MAPT|PPARG|S100A8|S100A9|SNCA|TNF	-4.04774
Input ID	GO Biological Processes	19	GO:0045471	response to ethanol	-5.1317	9.86842	7.5105	23250	133	124	7	5.64516	2.07257	1788|3553|4968|5037|5562|6279|6647	DNMT3A|IL1B|OGG1|PEBP1|PRKAA1|S100A8|SOD1	-4.04018
Input ID	GO Biological Processes	19	GO:0032461	positive regulation of protein oligomerization	-5.12264	31.25	10.8569	23250	24	124	4	3.22581	1.58668	3416|4314|7157|10013	IDE|MMP3|TP53|HDAC6	-4.03216
Input ID	GO Biological Processes	19	GO:1903959	regulation of anion transmembrane transport	-5.12264	31.25	10.8569	23250	24	124	4	3.22581	1.58668	2475|5243|5621|5663	MTOR|ABCB1|PRNP|PSEN1	-4.03216
Input ID	GO Biological Processes	19	GO:0010823	negative regulation of mitochondrion organization	-5.11462	18.3824	9.09959	23250	51	124	5	4.03226	1.76655	4000|4137|5071|9531|10891	LMNA|MAPT|PRKN|BAG3|PPARGC1A	-4.02545
Input ID	GO Biological Processes	19	GO:0098773	skin epidermis development	-5.11206	12.7841	8.10984	23250	88	124	6	4.83871	1.92701	1499|1956|4851|6654|7124|28514	CTNNB1|EGFR|NOTCH1|SOS1|TNF|DLL1	-4.02366
Input ID	KEGG Pathway	24	hsa04540	Gap junction	-5.11206	12.7841	8.10984	23250	88	124	6	4.83871	1.92701	1950|1956|2911|3845|5566|6654	EGF|EGFR|GRM1|KRAS|PRKACA|SOS1	-4.02366
Input ID	GO Biological Processes	19	GO:1901184	regulation of ERBB signaling pathway	-5.11206	12.7841	8.10984	23250	88	124	6	4.83871	1.92701	351|1950|1956|5663|6654|6868	APP|EGF|EGFR|PSEN1|SOS1|ADAM17	-4.02366
Input ID	GO Biological Processes	19	GO:0035265	organ growth	-5.10837	7.97872	7.03508	23250	188	124	8	6.45161	2.20618	2099|2475|2931|4851|5300|6647|7490|28514	ESR1|MTOR|GSK3A|NOTCH1|PIN1|SOD1|WT1|DLL1	-4.02023
Input ID	GO Biological Processes	19	GO:0006352	DNA-templated transcription, initiation	-5.10759	6.77711	6.71119	23250	249	124	9	7.25806	2.3299	1499|2099|2100|3146|4851|5465|5468|7157|10891	CTNNB1|ESR1|ESR2|HMGB1|NOTCH1|PPARA|PPARG|TP53|PPARGC1A	-4.01998
Input ID	GO Biological Processes	19	GO:0002218	activation of innate immune response	-5.10759	6.77711	6.71119	23250	249	124	9	7.25806	2.3299	338|2099|3146|3845|5566|5802|6279|6280|7099	APOB|ESR1|HMGB1|KRAS|PRKACA|PTPRS|S100A8|S100A9|TLR4	-4.01998
Input ID	GO Biological Processes	19	GO:0007626	locomotory behavior	-5.09151	7.93651	7.01125	23250	189	124	8	6.45161	2.20618	348|351|2911|5071|6622|6647|7345|11315	APOE|APP|GRM1|PRKN|SNCA|SOD1|UCHL1|PARK7	-4.00648
Input ID	GO Biological Processes	19	GO:0031620	regulation of fever generation	-5.08983	70.3125	14.3576	23250	8	124	3	2.41935	1.37981	3553|5743|7124	IL1B|PTGS2|TNF	-4.00506
Input ID	GO Biological Processes	19	GO:0016569	covalent chromatin modification	-5.08839	4.79744	6.0835	23250	469	124	12	9.67742	2.65502	672|1386|1499|1788|1789|3553|5562|6622|10013|10891|23410|23411	BRCA1|ATF2|CTNNB1|DNMT3A|DNMT3B|IL1B|PRKAA1|SNCA|HDAC6|PPARGC1A|SIRT3|SIRT1	-4.00387
Input ID	GO Biological Processes	19	GO:0016485	protein processing	-5.08628	5.89623	6.43749	23250	318	124	10	8.06452	2.44523	102|1510|1718|5566|5621|5653|5663|5664|10269|25825	ADAM10|CTSE|DHCR24|PRKACA|PRNP|KLK6|PSEN1|PSEN2|ZMPSTE24|BACE2	-4.00202
Input ID	GO Biological Processes	19	GO:1901654	response to ketone	-5.07475	7.89474	6.98759	23250	190	124	8	6.45161	2.20618	1789|1956|3553|5037|5468|5562|11315|23411	DNMT3B|EGFR|IL1B|PEBP1|PPARG|PRKAA1|PARK7|SIRT1	-3.9928
Input ID	GO Biological Processes	19	GO:0006367	transcription initiation from RNA polymerase II promoter	-5.07475	7.89474	6.98759	23250	190	124	8	6.45161	2.20618	2099|2100|3146|4851|5465|5468|7157|10891	ESR1|ESR2|HMGB1|NOTCH1|PPARA|PPARG|TP53|PPARGC1A	-3.9928
Input ID	GO Biological Processes	19	GO:0007566	embryo implantation	-5.07257	18.0288	9.0017	23250	52	124	5	4.03226	1.76655	682|3553|4313|5743|6647	BSG|IL1B|MMP2|PTGS2|SOD1	-3.99158
Input ID	Canonical Pathways	11	M50	PID PTP1B PATHWAY	-5.07257	18.0288	9.0017	23250	52	124	5	4.03226	1.76655	823|1950|1956|3630|3643	CAPN1|EGF|EGFR|INS|INSR	-3.99158
Input ID	GO Biological Processes	19	GO:0006281	DNA repair	-5.06927	4.39982	5.9306	23250	554	124	13	10.4839	2.75106	328|672|1956|2475|3146|4968|7157|7515|10273|10519|11315|23411|51008	APEX1|BRCA1|EGFR|MTOR|HMGB1|OGG1|TP53|XRCC1|STUB1|CIB1|PARK7|SIRT1|ASCC1	-3.98885
Input ID	GO Biological Processes	19	GO:0034250	positive regulation of cellular amide metabolic process	-5.06805	9.65074	7.4088	23250	136	124	7	5.64516	2.07257	351|2475|2931|3569|6895|7124|54103	APP|MTOR|GSK3A|IL6|TARBP2|TNF|GSAP	-3.98789
Input ID	GO Biological Processes	19	GO:0003007	heart morphogenesis	-5.06582	6.69643	6.65764	23250	252	124	9	7.25806	2.3299	1386|1499|2475|2931|3643|4851|5663|6654|28514	ATF2|CTNNB1|MTOR|GSK3A|INSR|NOTCH1|PSEN1|SOS1|DLL1	-3.98591
Input ID	GO Biological Processes	19	GO:0060996	dendritic spine development	-5.05555	12.5	8.0041	23250	90	124	6	4.83871	1.92701	348|2475|5663|5802|10013|80823	APOE|MTOR|PSEN1|PTPRS|HDAC6|BHLHB9	-3.97819
Input ID	GO Biological Processes	19	GO:1905269	positive regulation of chromatin organization	-5.05555	12.5	8.0041	23250	90	124	6	4.83871	1.92701	672|1499|1789|3553|10891|23411	BRCA1|CTNNB1|DNMT3B|IL1B|PPARGC1A|SIRT1	-3.97819
Input ID	GO Biological Processes	19	GO:0009798	axis specification	-5.05555	12.5	8.0041	23250	90	124	6	4.83871	1.92701	1499|1950|4851|7471|7490|28514	CTNNB1|EGF|NOTCH1|WNT1|WT1|DLL1	-3.97819
Input ID	KEGG Pathway	24	hsa05323	Rheumatoid arthritis	-5.05555	12.5	8.0041	23250	90	124	6	4.83871	1.92701	3552|3553|3569|4314|7099|7124	IL1A|IL1B|IL6|MMP3|TLR4|TNF	-3.97819
Input ID	GO Biological Processes	19	GO:2001023	regulation of response to drug	-5.05555	12.5	8.0041	23250	90	124	6	4.83871	1.92701	5071|5074|5663|6622|10013|11315	PRKN|PAWR|PSEN1|SNCA|HDAC6|PARK7	-3.97819
Input ID	GO Biological Processes	19	GO:0055094	response to lipoprotein particle	-5.04871	30	10.6231	23250	25	124	4	3.22581	1.58668	348|846|5468|7099	APOE|CASR|PPARG|TLR4	-3.97286
Input ID	Canonical Pathways	11	M32	PID HDAC CLASSIII PATHWAY	-5.04871	30	10.6231	23250	25	124	4	3.22581	1.58668	7157|10891|23410|23411	TP53|PPARGC1A|SIRT3|SIRT1	-3.97286
Input ID	Canonical Pathways	11	M264	PID TOLL ENDOGENOUS PATHWAY	-5.04871	30	10.6231	23250	25	124	4	3.22581	1.58668	3146|6279|6280|7099	HMGB1|S100A8|S100A9|TLR4	-3.97286
Input ID	GO Biological Processes	19	GO:0051194	positive regulation of cofactor metabolic process	-5.04871	30	10.6231	23250	25	124	4	3.22581	1.58668	3630|3643|5562|6622	INS|INSR|PRKAA1|SNCA	-3.97286
Input ID	GO Biological Processes	19	GO:0045922	negative regulation of fatty acid metabolic process	-5.04871	30	10.6231	23250	25	124	4	3.22581	1.58668	341|672|3630|23411	APOC1|BRCA1|INS|SIRT1	-3.97286
Input ID	GO Biological Processes	19	GO:0051640	organelle localization	-5.04748	4.07609	5.79685	23250	644	124	14	11.2903	2.84202	274|488|1499|3320|4137|5071|5294|5566|5663|6622|7345|8678|9638|10013	BIN1|ATP2A2|CTNNB1|HSP90AA1|MAPT|PRKN|PIK3CG|PRKACA|PSEN1|SNCA|UCHL1|BECN1|FEZ1|HDAC6	-3.9724
Input ID	GO Biological Processes	19	GO:0071322	cellular response to carbohydrate stimulus	-5.04718	9.58029	7.37559	23250	137	124	7	5.64516	2.07257	177|846|3553|5562|5566|7351|10891	AGER|CASR|IL1B|PRKAA1|PRKACA|UCP2|PPARGC1A	-3.97235
Input ID	GO Biological Processes	19	GO:0060541	respiratory system development	-5.04153	7.8125	6.94079	23250	192	124	8	6.45161	2.20618	1499|1956|3146|3845|4851|5534|7124|7490	CTNNB1|EGFR|HMGB1|KRAS|NOTCH1|PPP3R1|TNF|WT1	-3.96695
Input ID	GO Biological Processes	19	GO:0007159	leukocyte cell-cell adhesion	-5.03897	5.82298	6.38151	23250	322	124	10	8.06452	2.44523	177|3146|3553|3569|5074|5465|5621|6279|6280|7124	AGER|HMGB1|IL1B|IL6|PAWR|PPARA|PRNP|S100A8|S100A9|TNF	-3.96539
Input ID	GO Biological Processes	19	GO:0033044	regulation of chromosome organization	-5.03897	5.82298	6.38151	23250	322	124	10	8.06452	2.44523	672|1499|1789|3553|4137|6622|7515|8678|10891|23411	BRCA1|CTNNB1|DNMT3B|IL1B|MAPT|SNCA|XRCC1|BECN1|PPARGC1A|SIRT1	-3.96539
Input ID	GO Biological Processes	19	GO:0061564	axon development	-5.03302	4.73684	6.02539	23250	475	124	12	9.67742	2.65502	348|351|2932|3320|4137|4851|5663|5802|6654|7345|9638|10013	APOE|APP|GSK3B|HSP90AA1|MAPT|NOTCH1|PSEN1|PTPRS|SOS1|UCHL1|FEZ1|HDAC6	-3.95969
Input ID	GO Biological Processes	19	GO:1903078	positive regulation of protein localization to plasma membrane	-5.03138	17.6887	8.90649	23250	53	124	5	4.03226	1.76655	1956|4035|5621|8878|10519	EGFR|LRP1|PRNP|SQSTM1|CIB1	-3.95856
Input ID	GO Biological Processes	19	GO:2000117	negative regulation of cysteine-type endopeptidase activity	-5.02782	12.3626	7.95248	23250	91	124	6	4.83871	1.92701	1410|1718|2537|5743|6622|11315	CRYAB|DHCR24|IFI6|PTGS2|SNCA|PARK7	-3.95591
Input ID	GO Biological Processes	19	GO:0016042	lipid catabolic process	-5.02725	5.80495	6.36766	23250	323	124	10	8.06452	2.44523	338|341|348|2475|3553|3630|5294|5465|5562|7124	APOB|APOC1|APOE|MTOR|IL1B|INS|PIK3CG|PPARA|PRKAA1|TNF	-3.95591
Input ID	GO Biological Processes	19	GO:0072655	establishment of protein localization to mitochondrion	-5.02648	9.51087	7.34273	23250	138	124	7	5.64516	2.07257	2931|3320|4137|5071|5562|7157|9531	GSK3A|HSP90AA1|MAPT|PRKN|PRKAA1|TP53|BAG3	-3.95591
Input ID	KEGG Pathway	24	hsa04371	Apelin signaling pathway	-5.02648	9.51087	7.34273	23250	138	124	7	5.64516	2.07257	2475|3845|5294|5562|5566|8678|10891	MTOR|KRAS|PIK3CG|PRKAA1|PRKACA|BECN1|PPARGC1A	-3.95591
Input ID	GO Biological Processes	19	GO:0008203	cholesterol metabolic process	-5.02648	9.51087	7.34273	23250	138	124	7	5.64516	2.07257	338|341|348|351|1718|5562|6647	APOB|APOC1|APOE|APP|DHCR24|PRKAA1|SOD1	-3.95591
Input ID	GO Biological Processes	19	GO:0002757	immune response-activating signal transduction	-5.01121	4.34492	5.87249	23250	561	124	13	10.4839	2.75106	338|2099|3146|3320|3845|5074|5566|5621|5663|5802|6279|6280|7099	APOB|ESR1|HMGB1|HSP90AA1|KRAS|PAWR|PRKACA|PRNP|PSEN1|PTPRS|S100A8|S100A9|TLR4	-3.94238
Input ID	GO Biological Processes	19	GO:0050773	regulation of dendrite development	-5.00595	9.44245	7.3102	23250	139	124	7	5.64516	2.07257	348|2475|2931|2932|5663|5802|80823	APOE|MTOR|GSK3A|GSK3B|PSEN1|PTPRS|BHLHB9	-3.93762
Input ID	GO Biological Processes	19	GO:2001020	regulation of response to DNA damage stimulus	-4.99243	7.69231	6.87185	23250	195	124	8	6.45161	2.20618	672|1956|3146|4137|4968|7515|23411|57805	BRCA1|EGFR|HMGB1|MAPT|OGG1|XRCC1|SIRT1|CCAR2	-3.92534
Input ID	Reactome Gene Sets	6	R-HSA-74751	Insulin receptor signalling cascade	-4.99103	17.3611	8.81385	23250	54	124	5	4.03226	1.76655	3630|3643|3845|6654|9365	INS|INSR|KRAS|SOS1|KL	-3.92468
Input ID	GO Biological Processes	19	GO:0035065	regulation of histone acetylation	-4.99103	17.3611	8.81385	23250	54	124	5	4.03226	1.76655	672|3553|6622|10891|23411	BRCA1|IL1B|SNCA|PPARGC1A|SIRT1	-3.92468
Input ID	GO Biological Processes	19	GO:0045739	positive regulation of DNA repair	-4.99103	17.3611	8.81385	23250	54	124	5	4.03226	1.76655	672|1956|3146|7515|23411	BRCA1|EGFR|HMGB1|XRCC1|SIRT1	-3.92468
Input ID	GO Biological Processes	19	GO:0070585	protein localization to mitochondrion	-4.98558	9.375	7.27799	23250	140	124	7	5.64516	2.07257	2931|3320|4137|5071|5562|7157|9531	GSK3A|HSP90AA1|MAPT|PRKN|PRKAA1|TP53|BAG3	-3.91948
Input ID	GO Biological Processes	19	GO:0034377	plasma lipoprotein particle assembly	-4.97795	28.8462	10.4027	23250	26	124	4	3.22581	1.58668	338|341|348|5566	APOB|APOC1|APOE|PRKACA	-3.91357
Input ID	GO Biological Processes	19	GO:0002269	leukocyte activation involved in inflammatory response	-4.97795	28.8462	10.4027	23250	26	124	4	3.22581	1.58668	177|351|4137|6622	AGER|APP|MAPT|SNCA	-3.91357
Input ID	Reactome Gene Sets	6	R-HSA-1251985	Nuclear signaling by ERBB4	-4.97795	28.8462	10.4027	23250	26	124	4	3.22581	1.58668	2099|5663|5664|6868	ESR1|PSEN1|PSEN2|ADAM17	-3.91357
Input ID	GO Biological Processes	19	GO:0001774	microglial cell activation	-4.97795	28.8462	10.4027	23250	26	124	4	3.22581	1.58668	177|351|4137|6622	AGER|APP|MAPT|SNCA	-3.91357
Input ID	GO Biological Processes	19	GO:0009746	response to hexose	-4.97626	7.65306	6.84919	23250	196	124	8	6.45161	2.20618	177|846|3553|5562|5566|5743|7351|10891	AGER|CASR|IL1B|PRKAA1|PRKACA|PTGS2|UCP2|PPARGC1A	-3.91255
Input ID	GO Biological Processes	19	GO:1901655	cellular response to ketone	-4.97333	12.0968	7.85163	23250	93	124	6	4.83871	1.92701	1789|1956|5468|5562|11315|23411	DNMT3B|EGFR|PPARG|PRKAA1|PARK7|SIRT1	-3.91042
Input ID	GO Biological Processes	19	GO:0097327	response to antineoplastic agent	-4.97333	12.0968	7.85163	23250	93	124	6	4.83871	1.92701	672|1499|1789|1956|3553|5562	BRCA1|CTNNB1|DNMT3B|EGFR|IL1B|PRKAA1	-3.91042
Input ID	GO Biological Processes	19	GO:0071901	negative regulation of protein serine/threonine kinase activity	-4.96538	9.30851	7.24611	23250	141	124	7	5.64516	2.07257	348|1029|1030|3553|7345|10519|23411	APOE|CDKN2A|CDKN2B|IL1B|UCHL1|CIB1|SIRT1	-3.90369
Input ID	GO Biological Processes	19	GO:0097746	regulation of blood vessel diameter	-4.96538	9.30851	7.24611	23250	141	124	7	5.64516	2.07257	151|348|846|1956|3630|5743|6647	ADRA2B|APOE|CASR|EGFR|INS|PTGS2|SOD1	-3.90369
Input ID	GO Biological Processes	19	GO:0035296	regulation of tube diameter	-4.96538	9.30851	7.24611	23250	141	124	7	5.64516	2.07257	151|348|846|1956|3630|5743|6647	ADRA2B|APOE|CASR|EGFR|INS|PTGS2|SOD1	-3.90369
Input ID	GO Biological Processes	19	GO:0071398	cellular response to fatty acid	-4.95149	17.0455	8.72366	23250	55	124	5	4.03226	1.76655	338|3553|5468|5562|10891	APOB|IL1B|PPARG|PRKAA1|PPARGC1A	-3.89078
Input ID	GO Biological Processes	19	GO:0051168	nuclear export	-4.94419	7.57576	6.80435	23250	198	124	8	6.45161	2.20618	2932|3313|3553|3921|5566|7157|9531|11315	GSK3B|HSPA9|IL1B|RPSA|PRKACA|TP53|BAG3|PARK7	-3.88423
Input ID	GO Biological Processes	19	GO:1902105	regulation of leukocyte differentiation	-4.93062	6.44084	6.48528	23250	262	124	9	7.25806	2.3299	177|1499|2475|3146|3553|6647|6654|7099|7124	AGER|CTNNB1|MTOR|HMGB1|IL1B|SOD1|SOS1|TLR4|TNF	-3.87331
Input ID	KEGG Pathway	24	hsa04310	Wnt signaling pathway	-4.92544	9.17832	7.18329	23250	143	124	7	5.64516	2.07257	1499|2932|5534|5566|5663|7157|7471	CTNNB1|GSK3B|PPP3R1|PRKACA|PSEN1|TP53|WNT1	-3.86861
Input ID	GO Biological Processes	19	GO:2000060	positive regulation of ubiquitin-dependent protein catabolic process	-4.92012	11.8421	7.75382	23250	95	124	6	4.83871	1.92701	1950|2931|2932|5071|5663|10273	EGF|GSK3A|GSK3B|PRKN|PSEN1|STUB1	-3.86426
Input ID	GO Biological Processes	19	GO:1904375	regulation of protein localization to cell periphery	-4.92012	11.8421	7.75382	23250	95	124	6	4.83871	1.92701	1956|3630|4035|5621|8878|10519	EGFR|INS|LRP1|PRNP|SQSTM1|CIB1	-3.86426
Input ID	GO Biological Processes	19	GO:0043471	regulation of cellular carbohydrate catabolic process	-4.91543	62.5	13.5124	23250	9	124	3	2.41935	1.37981	2931|3146|3630	GSK3A|HMGB1|INS	-3.86171
Input ID	GO Biological Processes	19	GO:0034382	chylomicron remnant clearance	-4.91543	62.5	13.5124	23250	9	124	3	2.41935	1.37981	338|341|348	APOB|APOC1|APOE	-3.86171
Input ID	GO Biological Processes	19	GO:1902430	negative regulation of amyloid-beta formation	-4.91543	62.5	13.5124	23250	9	124	3	2.41935	1.37981	274|348|5621	BIN1|APOE|PRNP	-3.86171
Input ID	GO Biological Processes	19	GO:0051573	negative regulation of histone H3-K9 methylation	-4.91543	62.5	13.5124	23250	9	124	3	2.41935	1.37981	672|1789|23411	BRCA1|DNMT3B|SIRT1	-3.86171
Input ID	Reactome Gene Sets	6	R-HSA-2428933	SHC-related events triggered by IGF1R	-4.91543	62.5	13.5124	23250	9	124	3	2.41935	1.37981	3480|3845|6654	IGF1R|KRAS|SOS1	-3.86171
Input ID	GO Biological Processes	19	GO:0071830	triglyceride-rich lipoprotein particle clearance	-4.91543	62.5	13.5124	23250	9	124	3	2.41935	1.37981	338|341|348	APOB|APOC1|APOE	-3.86171
Input ID	GO Biological Processes	19	GO:0034447	very-low-density lipoprotein particle clearance	-4.91543	62.5	13.5124	23250	9	124	3	2.41935	1.37981	338|341|348	APOB|APOC1|APOE	-3.86171
Input ID	GO Biological Processes	19	GO:0050679	positive regulation of epithelial cell proliferation	-4.91248	7.5	6.76014	23250	200	124	8	6.45161	2.20618	1499|1956|2475|3146|4851|5654|6868|23411	CTNNB1|EGFR|MTOR|HMGB1|NOTCH1|HTRA1|ADAM17|SIRT1	-3.8593
Input ID	GO Biological Processes	19	GO:0010575	positive regulation of vascular endothelial growth factor production	-4.9101	27.7778	10.1944	23250	27	124	4	3.22581	1.58668	672|3552|3553|5743	BRCA1|IL1A|IL1B|PTGS2	-3.85833
Input ID	GO Biological Processes	19	GO:0007176	regulation of epidermal growth factor-activated receptor activity	-4.9101	27.7778	10.1944	23250	27	124	4	3.22581	1.58668	351|1950|5663|6868	APP|EGF|PSEN1|ADAM17	-3.85833
Input ID	GO Biological Processes	19	GO:0045932	negative regulation of muscle contraction	-4.9101	27.7778	10.1944	23250	27	124	4	3.22581	1.58668	274|5294|5743|6647	BIN1|PIK3CG|PTGS2|SOD1	-3.85833
Input ID	GO Biological Processes	19	GO:0033032	regulation of myeloid cell apoptotic process	-4.9101	27.7778	10.1944	23250	27	124	4	3.22581	1.58668	1029|1234|6868|23411	CDKN2A|CCR5|ADAM17|SIRT1	-3.85833
Input ID	GO Biological Processes	19	GO:1902652	secondary alcohol metabolic process	-4.9057	9.11458	7.15233	23250	144	124	7	5.64516	2.07257	338|341|348|351|1718|5562|6647	APOB|APOC1|APOE|APP|DHCR24|PRKAA1|SOD1	-3.85464
Input ID	GO Biological Processes	19	GO:0031056	regulation of histone modification	-4.9057	9.11458	7.15233	23250	144	124	7	5.64516	2.07257	672|1499|1789|3553|6622|10891|23411	BRCA1|CTNNB1|DNMT3B|IL1B|SNCA|PPARGC1A|SIRT1	-3.85464
Input ID	GO Biological Processes	19	GO:0034284	response to monosaccharide	-4.89677	7.46269	6.73826	23250	201	124	8	6.45161	2.20618	177|846|3553|5562|5566|5743|7351|10891	AGER|CASR|IL1B|PRKAA1|PRKACA|PTGS2|UCP2|PPARGC1A	-3.84761
Input ID	GO Biological Processes	19	GO:0050920	regulation of chemotaxis	-4.89677	7.46269	6.73826	23250	201	124	8	6.45161	2.20618	102|177|846|3146|3553|3569|4851|6868	ADAM10|AGER|CASR|HMGB1|IL1B|IL6|NOTCH1|ADAM17	-3.84761
Input ID	KEGG Pathway	24	hsa05203	Viral carcinogenesis	-4.89677	7.46269	6.73826	23250	201	124	8	6.45161	2.20618	1029|1030|1234|1386|3845|5566|7157|10013	CDKN2A|CDKN2B|CCR5|ATF2|KRAS|PRKACA|TP53|HDAC6	-3.84761
Input ID	GO Biological Processes	19	GO:0090263	positive regulation of canonical Wnt signaling pathway	-4.89398	11.7188	7.70601	23250	96	124	6	4.83871	1.92701	1950|1956|5300|7471|51527|57805	EGF|EGFR|PIN1|WNT1|GSKIP|CCAR2	-3.84577
Input ID	GO Biological Processes	19	GO:2001243	negative regulation of intrinsic apoptotic signaling pathway	-4.89398	11.7188	7.70601	23250	96	124	6	4.83871	1.92701	3630|5071|5743|11315|23411|57805	INS|PRKN|PTGS2|PARK7|SIRT1|CCAR2	-3.84577
Input ID	GO Biological Processes	19	GO:0050865	regulation of cell activation	-4.88185	4.22444	5.74315	23250	577	124	13	10.4839	2.75106	177|348|351|1499|3146|3553|3569|5074|5621|6622|6647|6654|7099	AGER|APOE|APP|CTNNB1|HMGB1|IL1B|IL6|PAWR|PRNP|SNCA|SOD1|SOS1|TLR4	-3.83388
Input ID	GO Biological Processes	19	GO:0046651	lymphocyte proliferation	-4.87821	6.34398	6.41883	23250	266	124	9	7.25806	2.3299	177|1499|3146|3553|3569|5074|5294|5621|6654	AGER|CTNNB1|HMGB1|IL1B|IL6|PAWR|PIK3CG|PRNP|SOS1	-3.83071
Input ID	GO Biological Processes	19	GO:0030855	epithelial cell differentiation	-4.87777	3.70066	5.54299	23250	760	124	15	12.0968	2.92837	823|1499|2099|2931|2932|3553|4851|5468|5534|5802|6647|7124|7471|7490|28514	CAPN1|CTNNB1|ESR1|GSK3A|GSK3B|IL1B|NOTCH1|PPARG|PPP3R1|PTPRS|SOD1|TNF|WNT1|WT1|DLL1	-3.83051
Input ID	GO Biological Processes	19	GO:0097755	positive regulation of blood vessel diameter	-4.87469	16.4474	8.5502	23250	57	124	5	4.03226	1.76655	348|846|1956|3630|6647	APOE|CASR|EGFR|INS|SOD1	-3.82814
Input ID	GO Biological Processes	19	GO:0042752	regulation of circadian rhythm	-4.86813	11.5979	7.6589	23250	97	124	6	4.83871	1.92701	5465|5468|5562|7157|10891|57805	PPARA|PPARG|PRKAA1|TP53|PPARGC1A|CCAR2	-3.82225
Input ID	GO Biological Processes	19	GO:0010631	epithelial cell migration	-4.86756	5.5638	6.17964	23250	337	124	10	8.06452	2.44523	348|2475|3146|4851|5468|5743|6868|10013|10519|23411	APOE|MTOR|HMGB1|NOTCH1|PPARG|PTGS2|ADAM17|HDAC6|CIB1|SIRT1	-3.82195
Input ID	GO Biological Processes	19	GO:0030902	hindbrain development	-4.86669	8.98973	7.09133	23250	146	124	7	5.64516	2.07257	1499|1950|5802|7471|7515|10891|28514	CTNNB1|EGF|PTPRS|WNT1|XRCC1|PPARGC1A|DLL1	-3.82132
Input ID	GO Biological Processes	19	GO:0034976	response to endoplasmic reticulum stress	-4.86525	6.32022	6.40243	23250	267	124	9	7.25806	2.3299	488|2931|2932|4000|5071|7157|10273|11315|23411	ATP2A2|GSK3A|GSK3B|LMNA|PRKN|TP53|STUB1|PARK7|SIRT1	-3.82011
Input ID	GO Biological Processes	19	GO:0032943	mononuclear cell proliferation	-4.85235	6.29664	6.38612	23250	268	124	9	7.25806	2.3299	177|1499|3146|3553|3569|5074|5294|5621|6654	AGER|CTNNB1|HMGB1|IL1B|IL6|PAWR|PIK3CG|PRNP|SOS1	-3.80862
Input ID	GO Biological Processes	19	GO:0006511	ubiquitin-dependent protein catabolic process	-4.85022	4.19535	5.71154	23250	581	124	13	10.4839	2.75106	1950|2931|2932|5071|5663|7345|7471|8878|10013|10273|11315|23411|57805	EGF|GSK3A|GSK3B|PRKN|PSEN1|UCHL1|WNT1|SQSTM1|HDAC6|STUB1|PARK7|SIRT1|CCAR2	-3.80712
Input ID	GO Biological Processes	19	GO:0030073	insulin secretion	-4.85015	7.35294	6.67352	23250	204	124	8	6.45161	2.20618	846|3553|4826|5071|7124|7351|11315|23410	CASR|IL1B|NNAT|PRKN|TNF|UCP2|PARK7|SIRT3	-3.80712
Input ID	GO Biological Processes	19	GO:0051783	regulation of nuclear division	-4.85015	7.35294	6.67352	23250	204	124	8	6.45161	2.20618	1950|3552|3553|3630|3643|5037|5300|8678	EGF|IL1A|IL1B|INS|INSR|PEBP1|PIN1|BECN1	-3.80712
Input ID	GO Biological Processes	19	GO:0016202	regulation of striated muscle tissue development	-4.84741	8.92857	7.06126	23250	147	124	7	5.64516	2.07257	1499|2475|2931|4851|5300|5562|28514	CTNNB1|MTOR|GSK3A|NOTCH1|PIN1|PRKAA1|DLL1	-3.80485
Input ID	KEGG Pathway	24	hsa04320	Dorso-ventral axis formation	-4.84495	26.7857	9.99703	23250	28	124	4	3.22581	1.58668	1956|3845|4851|6654	EGFR|KRAS|NOTCH1|SOS1	-3.80309
Input ID	GO Biological Processes	19	GO:2001171	positive regulation of ATP biosynthetic process	-4.84495	26.7857	9.99703	23250	28	124	4	3.22581	1.58668	3630|3643|5562|10891	INS|INSR|PRKAA1|PPARGC1A	-3.80309
Input ID	GO Biological Processes	19	GO:0046320	regulation of fatty acid oxidation	-4.84495	26.7857	9.99703	23250	28	124	4	3.22581	1.58668	2475|5465|5468|10891	MTOR|PPARA|PPARG|PPARGC1A	-3.80309
Input ID	GO Biological Processes	19	GO:0044264	cellular polysaccharide metabolic process	-4.84258	11.4796	7.61247	23250	98	124	6	4.83871	1.92701	2475|2931|2932|3146|3630|3643	MTOR|GSK3A|GSK3B|HMGB1|INS|INSR	-3.80165
Input ID	GO Biological Processes	19	GO:0098869	cellular oxidant detoxification	-4.84258	11.4796	7.61247	23250	98	124	6	4.83871	1.92701	348|5743|6280|6647|7124|11315	APOE|PTGS2|S100A9|SOD1|TNF|PARK7	-3.80165
Input ID	GO Biological Processes	19	GO:0090132	epithelium migration	-4.83437	5.51471	6.14072	23250	340	124	10	8.06452	2.44523	348|2475|3146|4851|5468|5743|6868|10013|10519|23411	APOE|MTOR|HMGB1|NOTCH1|PPARG|PTGS2|ADAM17|HDAC6|CIB1|SIRT1	-3.79507
Input ID	GO Biological Processes	19	GO:1903707	negative regulation of hemopoiesis	-4.82827	8.86824	7.03148	23250	148	124	7	5.64516	2.07257	1499|3146|3313|4851|7099|10519|28514	CTNNB1|HMGB1|HSPA9|NOTCH1|TLR4|CIB1|DLL1	-3.78921
Input ID	GO Biological Processes	19	GO:0050670	regulation of lymphocyte proliferation	-4.81951	7.28155	6.63108	23250	206	124	8	6.45161	2.20618	177|1499|3146|3553|3569|5074|5621|6654	AGER|CTNNB1|HMGB1|IL1B|IL6|PAWR|PRNP|SOS1	-3.7816
Input ID	GO Biological Processes	19	GO:0051591	response to cAMP	-4.81731	11.3636	7.56672	23250	99	124	6	4.83871	1.92701	328|351|682|5037|5294|7490	APEX1|APP|BSG|PEBP1|PIK3CG|WT1	-3.77986
Input ID	GO Biological Processes	19	GO:0050880	regulation of blood vessel size	-4.80928	8.80872	7.00198	23250	149	124	7	5.64516	2.07257	151|348|846|1956|3630|5743|6647	ADRA2B|APOE|CASR|EGFR|INS|PTGS2|SOD1	-3.77253
Input ID	GO Biological Processes	19	GO:0016052	carbohydrate catabolic process	-4.80928	8.80872	7.00198	23250	149	124	7	5.64516	2.07257	2931|3146|3630|3643|5465|5562|10891	GSK3A|HMGB1|INS|INSR|PPARA|PRKAA1|PPARGC1A	-3.77253
Input ID	GO Biological Processes	19	GO:0007017	microtubule-based process	-4.80465	3.64786	5.47516	23250	771	124	15	12.0968	2.92837	351|672|1410|1499|2932|4000|4137|5300|5562|6622|6647|7345|9638|10013|10519	APP|BRCA1|CRYAB|CTNNB1|GSK3B|LMNA|MAPT|PIN1|PRKAA1|SNCA|SOD1|UCHL1|FEZ1|HDAC6|CIB1	-3.76859
Input ID	GO Biological Processes	19	GO:0032944	regulation of mononuclear cell proliferation	-4.80431	7.24638	6.61008	23250	207	124	8	6.45161	2.20618	177|1499|3146|3553|3569|5074|5621|6654	AGER|CTNNB1|HMGB1|IL1B|IL6|PAWR|PRNP|SOS1	-3.76848
Input ID	GO Biological Processes	19	GO:0045666	positive regulation of neuron differentiation	-4.80152	5.46647	6.10225	23250	343	124	10	8.06452	2.44523	151|348|1789|2475|4137|5071|5663|6280|9638|80823	ADRA2B|APOE|DNMT3B|MTOR|MAPT|PRKN|PSEN1|S100A9|FEZ1|BHLHB9	-3.76638
Input ID	GO Biological Processes	19	GO:1904377	positive regulation of protein localization to cell periphery	-4.80078	15.8898	8.3853	23250	59	124	5	4.03226	1.76655	1956|4035|5621|8878|10519	EGFR|LRP1|PRNP|SQSTM1|CIB1	-3.76633
Input ID	GO Biological Processes	19	GO:0008088	axo-dendritic transport	-4.80078	15.8898	8.3853	23250	59	124	5	4.03226	1.76655	351|4137|6647|7345|9638	APP|MAPT|SOD1|UCHL1|FEZ1	-3.76633
Input ID	Canonical Pathways	11	M17	PID NOTCH PATHWAY	-4.80078	15.8898	8.3853	23250	59	124	5	4.03226	1.76655	102|4851|5663|8038|28514	ADAM10|NOTCH1|PSEN1|ADAM12|DLL1	-3.76633
Input ID	GO Biological Processes	19	GO:0035150	regulation of tube size	-4.79044	8.75	6.97275	23250	150	124	7	5.64516	2.07257	151|348|846|1956|3630|5743|6647	ADRA2B|APOE|CASR|EGFR|INS|PTGS2|SOD1	-3.75782
Input ID	KEGG Pathway	24	hsa05216	Thyroid cancer	-4.78228	25.8621	9.80976	23250	29	124	4	3.22581	1.58668	1499|3845|5468|7157	CTNNB1|KRAS|PPARG|TP53	-3.75172
Input ID	Canonical Pathways	11	M235	PID TCR CALCIUM PATHWAY	-4.78228	25.8621	9.80976	23250	29	124	4	3.22581	1.58668	1827|5534|5566|5743	RCAN1|PPP3R1|PRKACA|PTGS2	-3.75172
Input ID	Reactome Gene Sets	6	R-HSA-8863795	Downregulation of ERBB2 signaling	-4.78228	25.8621	9.80976	23250	29	124	4	3.22581	1.58668	1950|1956|3320|10273	EGF|EGFR|HSP90AA1|STUB1	-3.75172
Input ID	GO Biological Processes	19	GO:0010874	regulation of cholesterol efflux	-4.78228	25.8621	9.80976	23250	29	124	4	3.22581	1.58668	348|1950|4035|23411	APOE|EGF|LRP1|SIRT1	-3.75172
Input ID	GO Biological Processes	19	GO:0098609	cell-cell adhesion	-4.7784	3.62903	5.45079	23250	775	124	15	12.0968	2.92837	177|1499|1956|3146|3553|3569|5074|5294|5465|5621|5663|6279|6280|7124|7471	AGER|CTNNB1|EGFR|HMGB1|IL1B|IL6|PAWR|PIK3CG|PPARA|PRNP|PSEN1|S100A8|S100A9|TNF|WNT1	-3.74806
Input ID	GO Biological Processes	19	GO:0048634	regulation of muscle organ development	-4.77173	8.69205	6.94379	23250	151	124	7	5.64516	2.07257	1499|2475|2931|4851|5300|5562|28514	CTNNB1|MTOR|GSK3A|NOTCH1|PIN1|PRKAA1|DLL1	-3.74251
Input ID	GO Biological Processes	19	GO:0090130	tissue migration	-4.76901	5.41908	6.06424	23250	346	124	10	8.06452	2.44523	348|2475|3146|4851|5468|5743|6868|10013|10519|23411	APOE|MTOR|HMGB1|NOTCH1|PPARG|PTGS2|ADAM17|HDAC6|CIB1|SIRT1	-3.74004
Input ID	GO Biological Processes	19	GO:0071887	leukocyte apoptotic process	-4.76761	11.1386	7.47715	23250	101	124	6	4.83871	1.92701	1029|1234|3569|6868|7157|23411	CDKN2A|CCR5|IL6|ADAM17|TP53|SIRT1	-3.73931
Input ID	GO Biological Processes	19	GO:0006476	protein deacetylation	-4.76761	11.1386	7.47715	23250	101	124	6	4.83871	1.92701	4137|5562|10013|23410|23411|57805	MAPT|PRKAA1|HDAC6|SIRT3|SIRT1|CCAR2	-3.73931
Input ID	GO Biological Processes	19	GO:0018107	peptidyl-threonine phosphorylation	-4.76761	11.1386	7.47715	23250	101	124	6	4.83871	1.92701	351|1950|2475|2931|2932|5566	APP|EGF|MTOR|GSK3A|GSK3B|PRKACA	-3.73931
Input ID	GO Biological Processes	19	GO:2000109	regulation of macrophage apoptotic process	-4.76223	56.25	12.7961	23250	10	124	3	2.41935	1.37981	1029|1234|23411	CDKN2A|CCR5|SIRT1	-3.73483
Input ID	GO Biological Processes	19	GO:0046886	positive regulation of hormone biosynthetic process	-4.76223	56.25	12.7961	23250	10	124	3	2.41935	1.37981	3553|7124|10891	IL1B|TNF|PPARGC1A	-3.73483
Input ID	GO Biological Processes	19	GO:1902004	positive regulation of amyloid-beta formation	-4.76223	56.25	12.7961	23250	10	124	3	2.41935	1.37981	351|2931|54103	APP|GSK3A|GSAP	-3.73483
Input ID	Reactome Gene Sets	6	R-HSA-74749	Signal attenuation	-4.76223	56.25	12.7961	23250	10	124	3	2.41935	1.37981	3630|3643|6654	INS|INSR|SOS1	-3.73483
Input ID	GO Biological Processes	19	GO:0030856	regulation of epithelial cell differentiation	-4.75316	8.63487	6.91511	23250	152	124	7	5.64516	2.07257	1499|2931|2932|3553|4851|7124|28514	CTNNB1|GSK3A|GSK3B|IL1B|NOTCH1|TNF|DLL1	-3.72656
Input ID	GO Biological Processes	19	GO:1990748	cellular detoxification	-4.74316	11.0294	7.4333	23250	102	124	6	4.83871	1.92701	348|5743|6280|6647|7124|11315	APOE|PTGS2|S100A9|SOD1|TNF|PARK7	-3.71869
Input ID	GO Biological Processes	19	GO:0019359	nicotinamide nucleotide biosynthetic process	-4.74316	11.0294	7.4333	23250	102	124	6	4.83871	1.92701	3630|3643|5465|5562|5743|10891	INS|INSR|PPARA|PRKAA1|PTGS2|PPARGC1A	-3.71869
Input ID	GO Biological Processes	19	GO:0019363	pyridine nucleotide biosynthetic process	-4.74316	11.0294	7.4333	23250	102	124	6	4.83871	1.92701	3630|3643|5465|5562|5743|10891	INS|INSR|PPARA|PRKAA1|PTGS2|PPARGC1A	-3.71869
Input ID	GO Biological Processes	19	GO:0051054	positive regulation of DNA metabolic process	-4.72958	7.07547	6.50711	23250	212	124	8	6.45161	2.20618	672|1499|1956|3146|3320|7515|10891|23411	BRCA1|CTNNB1|EGFR|HMGB1|HSP90AA1|XRCC1|PPARGC1A|SIRT1	-3.70665
Input ID	GO Biological Processes	19	GO:0031670	cellular response to nutrient	-4.72955	15.3689	8.22827	23250	61	124	5	4.03226	1.76655	846|1030|5468|5743|6647	CASR|CDKN2B|PPARG|PTGS2|SOD1	-3.70665
Input ID	GO Biological Processes	19	GO:1905207	regulation of cardiocyte differentiation	-4.72955	15.3689	8.22827	23250	61	124	5	4.03226	1.76655	1956|2475|2931|5300|28514	EGFR|MTOR|GSK3A|PIN1|DLL1	-3.70665
Input ID	GO Biological Processes	19	GO:0051354	negative regulation of oxidoreductase activity	-4.72193	25	9.63171	23250	30	124	4	3.22581	1.58668	3630|5071|6622|10013	INS|PRKN|SNCA|HDAC6	-3.69992
Input ID	Reactome Gene Sets	6	R-HSA-9020702	Interleukin-1 signaling	-4.71898	10.9223	7.39005	23250	103	124	6	4.83871	1.92701	177|351|3146|3552|3553|8878	AGER|APP|HMGB1|IL1A|IL1B|SQSTM1	-3.69764
Input ID	GO Biological Processes	19	GO:0021510	spinal cord development	-4.71898	10.9223	7.39005	23250	103	124	6	4.83871	1.92701	2475|4851|5802|7471|9531|28514	MTOR|NOTCH1|PTPRS|WNT1|BAG3|DLL1	-3.69764
Input ID	GO Biological Processes	19	GO:0016032	viral process	-4.7063	3.79884	5.46916	23250	691	124	14	11.2903	2.84202	274|348|1234|1956|3416|3643|3921|4851|5071|6895|7124|7157|8678|23411	BIN1|APOE|CCR5|EGFR|IDE|INSR|RPSA|NOTCH1|PRKN|TARBP2|TNF|TP53|BECN1|SIRT1	-3.68652
Input ID	GO Biological Processes	19	GO:0090066	regulation of anatomical structure size	-4.70128	4.38596	5.67855	23250	513	124	12	9.67742	2.65502	151|274|348|846|1956|2475|2932|3630|4137|5743|5802|6647	ADRA2B|BIN1|APOE|CASR|EGFR|MTOR|GSK3B|INS|MAPT|PTGS2|PTPRS|SOD1	-3.68305
Input ID	GO Biological Processes	19	GO:0042089	cytokine biosynthetic process	-4.69506	10.8173	7.3474	23250	104	124	6	4.83871	1.92701	3552|3553|3569|5074|7099|7124	IL1A|IL1B|IL6|PAWR|TLR4|TNF	-3.67771
Input ID	GO Biological Processes	19	GO:0031346	positive regulation of cell projection organization	-4.68395	5.29661	5.965	23250	354	124	10	8.06452	2.44523	348|2475|3630|4137|5071|5663|6280|7471|9638|80823	APOE|MTOR|INS|MAPT|PRKN|PSEN1|S100A9|WNT1|FEZ1|BHLHB9	-3.66771
Input ID	GO Biological Processes	19	GO:1990138	neuron projection extension	-4.68024	8.41346	6.80294	23250	156	124	7	5.64516	2.07257	348|1499|2932|3320|4137|5071|5802	APOE|CTNNB1|GSK3B|HSP90AA1|MAPT|PRKN|PTPRS	-3.66443
Input ID	GO Biological Processes	19	GO:0010508	positive regulation of autophagy	-4.67138	10.7143	7.30533	23250	105	124	6	4.83871	1.92701	5071|5562|8678|10013|11315|23411	PRKN|PRKAA1|BECN1|HDAC6|PARK7|SIRT1	-3.65719
Input ID	GO Biological Processes	19	GO:0042107	cytokine metabolic process	-4.67138	10.7143	7.30533	23250	105	124	6	4.83871	1.92701	3552|3553|3569|5074|7099|7124	IL1A|IL1B|IL6|PAWR|TLR4|TNF	-3.65719
Input ID	GO Biological Processes	19	GO:0046620	regulation of organ growth	-4.67138	10.7143	7.30533	23250	105	124	6	4.83871	1.92701	2475|2931|4851|5300|6647|7490	MTOR|GSK3A|NOTCH1|PIN1|SOD1|WT1	-3.65719
Input ID	GO Biological Processes	19	GO:0072525	pyridine-containing compound biosynthetic process	-4.67138	10.7143	7.30533	23250	105	124	6	4.83871	1.92701	3630|3643|5465|5562|5743|10891	INS|INSR|PPARA|PRKAA1|PTGS2|PPARGC1A	-3.65719
Input ID	GO Biological Processes	19	GO:0070663	regulation of leukocyte proliferation	-4.67124	6.94444	6.42712	23250	216	124	8	6.45161	2.20618	177|1499|3146|3553|3569|5074|5621|6654	AGER|CTNNB1|HMGB1|IL1B|IL6|PAWR|PRNP|SOS1	-3.65719
Input ID	GO Biological Processes	19	GO:0070661	leukocyte proliferation	-4.66532	5.9629	6.15091	23250	283	124	9	7.25806	2.3299	177|1499|3146|3553|3569|5074|5294|5621|6654	AGER|CTNNB1|HMGB1|IL1B|IL6|PAWR|PIK3CG|PRNP|SOS1	-3.6528
Input ID	GO Biological Processes	19	GO:2000758	positive regulation of peptidyl-lysine acetylation	-4.66372	24.1935	9.46213	23250	31	124	4	3.22581	1.58668	672|3553|5562|10891	BRCA1|IL1B|PRKAA1|PPARGC1A	-3.65207
Input ID	KEGG Pathway	24	hsa01523	Antifolate resistance	-4.66372	24.1935	9.46213	23250	31	124	4	3.22581	1.58668	3553|3569|7124|9429	IL1B|IL6|TNF|ABCG2	-3.65207
Input ID	Canonical Pathways	11	M242	PID AURORA A PATHWAY	-4.66372	24.1935	9.46213	23250	31	124	4	3.22581	1.58668	672|2932|5566|7157	BRCA1|GSK3B|PRKACA|TP53	-3.65207
Input ID	GO Biological Processes	19	GO:0001504	neurotransmitter uptake	-4.66372	24.1935	9.46213	23250	31	124	4	3.22581	1.58668	5071|5663|6622|11315	PRKN|PSEN1|SNCA|PARK7	-3.65207
Input ID	GO Biological Processes	19	GO:0006606	protein import into nucleus	-4.66233	8.35987	6.77552	23250	157	124	7	5.64516	2.07257	4000|5534|5663|5743|7124|9531|23411	LMNA|PPP3R1|PSEN1|PTGS2|TNF|BAG3|SIRT1	-3.65199
Input ID	GO Biological Processes	19	GO:0016125	sterol metabolic process	-4.66233	8.35987	6.77552	23250	157	124	7	5.64516	2.07257	338|341|348|351|1718|5562|6647	APOB|APOC1|APOE|APP|DHCR24|PRKAA1|SOD1	-3.65199
Input ID	GO Biological Processes	19	GO:2001236	regulation of extrinsic apoptotic signaling pathway	-4.66233	8.35987	6.77552	23250	157	124	7	5.64516	2.07257	672|2537|3552|3553|4000|7124|11315	BRCA1|IFI6|IL1A|IL1B|LMNA|TNF|PARK7	-3.65199
Input ID	GO Biological Processes	19	GO:0006475	internal protein amino acid acetylation	-4.66233	8.35987	6.77552	23250	157	124	7	5.64516	2.07257	672|1386|3553|4137|6622|10891|23411	BRCA1|ATF2|IL1B|MAPT|SNCA|PPARGC1A|SIRT1	-3.65199
Input ID	Canonical Pathways	11	M54	PID IL12 2PATHWAY	-4.66081	14.881	8.07849	23250	63	124	5	4.03226	1.76655	1234|1386|2475|3553|5534	CCR5|ATF2|MTOR|IL1B|PPP3R1	-3.6509
Input ID	GO Biological Processes	19	GO:0071230	cellular response to amino acid stimulus	-4.66081	14.881	8.07849	23250	63	124	5	4.03226	1.76655	1788|1956|2475|4313|7124	DNMT3A|EGFR|MTOR|MMP2|TNF	-3.6509
Input ID	GO Biological Processes	19	GO:0071216	cellular response to biotic stimulus	-4.65685	6.91244	6.40744	23250	217	124	8	6.45161	2.20618	1234|2932|3553|3569|7099|7124|7157|10891	CCR5|GSK3B|IL1B|IL6|TLR4|TNF|TP53|PPARGC1A	-3.64759
Input ID	GO Biological Processes	19	GO:0019058	viral life cycle	-4.65326	5.9419	6.13583	23250	284	124	9	7.25806	2.3299	348|1234|1956|3416|3921|4851|5071|6895|7124	APOE|CCR5|EGFR|IDE|RPSA|NOTCH1|PRKN|TARBP2|TNF	-3.64444
Input ID	GO Biological Processes	19	GO:0090288	negative regulation of cellular response to growth factor stimulus	-4.64456	8.30696	6.74835	23250	158	124	7	5.64516	2.07257	4851|5300|5654|6868|7471|10273|23411	NOTCH1|PIN1|HTRA1|ADAM17|WNT1|STUB1|SIRT1	-3.63768
Input ID	GO Biological Processes	19	GO:1903034	regulation of response to wounding	-4.64456	8.30696	6.74835	23250	158	124	7	5.64516	2.07257	177|348|2475|3146|5802|6280|7099	AGER|APOE|MTOR|HMGB1|PTPRS|S100A9|TLR4	-3.63768
Input ID	KEGG Pathway	24	hsa05212	Pancreatic cancer	-4.62733	14.6484	8.00613	23250	64	124	5	4.03226	1.76655	1029|1950|1956|3845|7157	CDKN2A|EGF|EGFR|KRAS|TP53	-3.62388
Input ID	GO Biological Processes	19	GO:1902950	regulation of dendritic spine maintenance	-4.62562	51.1364	12.1788	23250	11	124	3	2.41935	1.37981	348|3630|5621	APOE|INS|PRNP	-3.62388
Input ID	GO Biological Processes	19	GO:1902992	negative regulation of amyloid precursor protein catabolic process	-4.62562	51.1364	12.1788	23250	11	124	3	2.41935	1.37981	274|348|5621	BIN1|APOE|PRNP	-3.62388
Input ID	GO Biological Processes	19	GO:0051934	catecholamine uptake involved in synaptic transmission	-4.62562	51.1364	12.1788	23250	11	124	3	2.41935	1.37981	5071|6622|11315	PRKN|SNCA|PARK7	-3.62388
Input ID	GO Biological Processes	19	GO:0045073	regulation of chemokine biosynthetic process	-4.62562	51.1364	12.1788	23250	11	124	3	2.41935	1.37981	3553|3569|7124	IL1B|IL6|TNF	-3.62388
Input ID	GO Biological Processes	19	GO:0090042	tubulin deacetylation	-4.62562	51.1364	12.1788	23250	11	124	3	2.41935	1.37981	4137|5562|10013	MAPT|PRKAA1|HDAC6	-3.62388
Input ID	GO Biological Processes	19	GO:0051583	dopamine uptake involved in synaptic transmission	-4.62562	51.1364	12.1788	23250	11	124	3	2.41935	1.37981	5071|6622|11315	PRKN|SNCA|PARK7	-3.62388
Input ID	Reactome Gene Sets	6	R-HSA-9013700	NOTCH4 Activation and Transmission of Signal to the Nucleus	-4.62562	51.1364	12.1788	23250	11	124	3	2.41935	1.37981	102|5663|5664	ADAM10|PSEN1|PSEN2	-3.62388
Input ID	GO Biological Processes	19	GO:0031652	positive regulation of heat generation	-4.62562	51.1364	12.1788	23250	11	124	3	2.41935	1.37981	3553|5743|7124	IL1B|PTGS2|TNF	-3.62388
Input ID	Reactome Gene Sets	6	R-HSA-193692	Regulated proteolysis of p75NTR	-4.62562	51.1364	12.1788	23250	11	124	3	2.41935	1.37981	5663|5664|6868	PSEN1|PSEN2|ADAM17	-3.62388
Input ID	GO Biological Processes	19	GO:0043200	response to amino acid	-4.62478	10.514	7.22285	23250	107	124	6	4.83871	1.92701	1788|1956|2475|4313|7124|10891	DNMT3A|EGFR|MTOR|MMP2|TNF|PPARGC1A	-3.62325
Input ID	GO Biological Processes	19	GO:0018394	peptidyl-lysine acetylation	-4.60939	8.20312	6.69471	23250	160	124	7	5.64516	2.07257	672|1386|3553|5562|6622|10891|23411	BRCA1|ATF2|IL1B|PRKAA1|SNCA|PPARGC1A|SIRT1	-3.60977
Input ID	GO Biological Processes	19	GO:2001252	positive regulation of chromosome organization	-4.60939	8.20312	6.69471	23250	160	124	7	5.64516	2.07257	672|1499|1789|3553|8678|10891|23411	BRCA1|CTNNB1|DNMT3B|IL1B|BECN1|PPARGC1A|SIRT1	-3.60977
Input ID	GO Biological Processes	19	GO:0001963	synaptic transmission, dopaminergic	-4.60752	23.4375	9.30036	23250	32	124	4	3.22581	1.58668	5071|5743|6622|11315	PRKN|PTGS2|SNCA|PARK7	-3.60853
Input ID	GO Biological Processes	19	GO:0048713	regulation of oligodendrocyte differentiation	-4.60752	23.4375	9.30036	23250	32	124	4	3.22581	1.58668	1499|2475|4851|5468	CTNNB1|MTOR|NOTCH1|PPARG	-3.60853
Input ID	GO Biological Processes	19	GO:0045923	positive regulation of fatty acid metabolic process	-4.60752	23.4375	9.30036	23250	32	124	4	3.22581	1.58668	5465|5468|5743|10891	PPARA|PPARG|PTGS2|PPARGC1A	-3.60853
Input ID	GO Biological Processes	19	GO:0046916	cellular transition metal ion homeostasis	-4.60184	10.4167	7.18243	23250	108	124	6	4.83871	1.92701	351|5621|6279|6280|6647|9429	APP|PRNP|S100A8|S100A9|SOD1|ABCG2	-3.60476
Input ID	KEGG Pathway	24	hsa04668	TNF signaling pathway	-4.60184	10.4167	7.18243	23250	108	124	6	4.83871	1.92701	1386|3553|3569|4314|5743|7124	ATF2|IL1B|IL6|MMP3|PTGS2|TNF	-3.60476
Input ID	GO Biological Processes	19	GO:0021987	cerebral cortex development	-4.60184	10.4167	7.18243	23250	108	124	6	4.83871	1.92701	1499|1956|2932|4035|5663|5802	CTNNB1|EGFR|GSK3B|LRP1|PSEN1|PTPRS	-3.60476
Input ID	GO Biological Processes	19	GO:1904019	epithelial cell apoptotic process	-4.60184	10.4167	7.18243	23250	108	124	6	4.83871	1.92701	1788|2475|3569|5294|7124|10891	DNMT3A|MTOR|IL6|PIK3CG|TNF|PPARGC1A	-3.60476
Input ID	GO Biological Processes	19	GO:0006090	pyruvate metabolic process	-4.60184	10.4167	7.18243	23250	108	124	6	4.83871	1.92701	682|3630|3643|5465|5562|10891	BSG|INS|INSR|PPARA|PRKAA1|PPARGC1A	-3.60476
Input ID	GO Biological Processes	19	GO:0018210	peptidyl-threonine modification	-4.60184	10.4167	7.18243	23250	108	124	6	4.83871	1.92701	351|1950|2475|2931|2932|5566	APP|EGF|MTOR|GSK3A|GSK3B|PRKACA	-3.60476
Input ID	GO Biological Processes	19	GO:0006282	regulation of DNA repair	-4.60184	10.4167	7.18243	23250	108	124	6	4.83871	1.92701	672|1956|3146|4968|7515|23411	BRCA1|EGFR|HMGB1|OGG1|XRCC1|SIRT1	-3.60476
Input ID	KEGG Pathway	24	hsa05230	Central carbon metabolism in cancer	-4.59441	14.4231	7.93538	23250	65	124	5	4.03226	1.76655	1956|2475|3845|7157|23410	EGFR|MTOR|KRAS|TP53|SIRT3	-3.59796
Input ID	KEGG Pathway	24	hsa05321	Inflammatory bowel disease (IBD)	-4.59441	14.4231	7.93538	23250	65	124	5	4.03226	1.76655	3552|3553|3569|7099|7124	IL1A|IL1B|IL6|TLR4|TNF	-3.59796
Input ID	GO Biological Processes	19	GO:0010594	regulation of endothelial cell migration	-4.58602	6.75676	6.31087	23250	222	124	8	6.45161	2.20618	348|3146|4851|5468|5743|6868|10519|23411	APOE|HMGB1|NOTCH1|PPARG|PTGS2|ADAM17|CIB1|SIRT1	-3.59187
Input ID	Canonical Pathways	11	M15	PID LYSOPHOSPHOLIPID PATHWAY	-4.56205	14.2045	7.86618	23250	66	124	5	4.03226	1.76655	1956|2932|3569|4137|4313	EGFR|GSK3B|IL6|MAPT|MMP2	-3.56957
Input ID	GO Biological Processes	19	GO:0006284	base-excision repair	-4.56205	14.2045	7.86618	23250	66	124	5	4.03226	1.76655	328|3146|4968|7157|7515	APEX1|HMGB1|OGG1|TP53|XRCC1	-3.56957
Input ID	GO Biological Processes	19	GO:0033692	cellular polysaccharide biosynthetic process	-4.56205	14.2045	7.86618	23250	66	124	5	4.03226	1.76655	2475|2931|2932|3630|3643	MTOR|GSK3A|GSK3B|INS|INSR	-3.56957
Input ID	GO Biological Processes	19	GO:0050821	protein stabilization	-4.55756	8.05215	6.61598	23250	163	124	7	5.64516	2.07257	1410|3320|5071|5300|9531|10891|11315	CRYAB|HSP90AA1|PRKN|PIN1|BAG3|PPARGC1A|PARK7	-3.56592
Input ID	GO Biological Processes	19	GO:0010634	positive regulation of epithelial cell migration	-4.55756	8.05215	6.61598	23250	163	124	7	5.64516	2.07257	2475|3146|5743|6868|10013|10519|23411	MTOR|HMGB1|PTGS2|ADAM17|HDAC6|CIB1|SIRT1	-3.56592
Input ID	KEGG Pathway	24	hsa04022	cGMP-PKG signaling pathway	-4.55756	8.05215	6.61598	23250	163	124	7	5.64516	2.07257	151|488|1386|3630|3643|5294|5534	ADRA2B|ATP2A2|ATF2|INS|INSR|PIK3CG|PPP3R1	-3.56592
Input ID	Reactome Gene Sets	6	R-HSA-1980145	Signaling by NOTCH2	-4.55319	22.7273	9.1458	23250	33	124	4	3.22581	1.58668	102|5663|5664|28514	ADAM10|PSEN1|PSEN2|DLL1	-3.563
Input ID	KEGG Pathway	24	hsa03410	Base excision repair	-4.55319	22.7273	9.1458	23250	33	124	4	3.22581	1.58668	328|3146|4968|7515	APEX1|HMGB1|OGG1|XRCC1	-3.563
Input ID	GO Biological Processes	19	GO:0050849	negative regulation of calcium-mediated signaling	-4.55319	22.7273	9.1458	23250	33	124	4	3.22581	1.58668	1827|2475|2932|5621	RCAN1|MTOR|GSK3B|PRNP	-3.563
Input ID	GO Biological Processes	19	GO:0035601	protein deacylation	-4.53441	10.1351	7.06426	23250	111	124	6	4.83871	1.92701	4137|5562|10013|23410|23411|57805	MAPT|PRKAA1|HDAC6|SIRT3|SIRT1|CCAR2	-3.54629
Input ID	GO Biological Processes	19	GO:0031109	microtubule polymerization or depolymerization	-4.53441	10.1351	7.06426	23250	111	124	6	4.83871	1.92701	1410|4137|5300|6622|10013|10519	CRYAB|MAPT|PIN1|SNCA|HDAC6|CIB1	-3.54629
Input ID	Reactome Gene Sets	6	R-HSA-109582	Hemostasis	-4.53386	3.91252	5.39588	23250	623	124	13	10.4839	2.75106	151|338|351|488|682|1950|3845|5294|5566|6647|6654|7157|11216	ADRA2B|APOB|APP|ATP2A2|BSG|EGF|KRAS|PIK3CG|PRKACA|SOD1|SOS1|TP53|AKAP10	-3.54594
Input ID	Canonical Pathways	11	M295	SIG PIP3 SIGNALING IN CARDIAC MYOCTES	-4.53021	13.9925	7.79847	23250	67	124	5	4.03226	1.76655	1029|2475|2931|2932|6654	CDKN2A|MTOR|GSK3A|GSK3B|SOS1	-3.5425
Input ID	GO Biological Processes	19	GO:0006937	regulation of muscle contraction	-4.5236	7.95455	6.5646	23250	165	124	7	5.64516	2.07257	151|274|488|5294|5566|5743|6647	ADRA2B|BIN1|ATP2A2|PIK3CG|PRKACA|PTGS2|SOD1	-3.53774
Input ID	KEGG Pathway	24	hsa04014	Ras signaling pathway	-4.51701	6.60793	6.21723	23250	227	124	8	6.45161	2.20618	1950|1956|3480|3630|3643|3845|5566|6654	EGF|EGFR|IGF1R|INS|INSR|KRAS|PRKACA|SOS1	-3.53218
Input ID	GO Biological Processes	19	GO:0045446	endothelial cell differentiation	-4.51238	10.0446	7.02587	23250	112	124	6	4.83871	1.92701	1499|3553|4851|5802|7124|28514	CTNNB1|IL1B|NOTCH1|PTPRS|TNF|DLL1	-3.52885
Input ID	GO Biological Processes	19	GO:0042303	molting cycle	-4.51238	10.0446	7.02587	23250	112	124	6	4.83871	1.92701	1499|1956|4851|5743|6654|7124	CTNNB1|EGFR|NOTCH1|PTGS2|SOS1|TNF	-3.52885
Input ID	GO Biological Processes	19	GO:0098732	macromolecule deacylation	-4.51238	10.0446	7.02587	23250	112	124	6	4.83871	1.92701	4137|5562|10013|23410|23411|57805	MAPT|PRKAA1|HDAC6|SIRT3|SIRT1|CCAR2	-3.52885
Input ID	GO Biological Processes	19	GO:0042633	hair cycle	-4.51238	10.0446	7.02587	23250	112	124	6	4.83871	1.92701	1499|1956|4851|5743|6654|7124	CTNNB1|EGFR|NOTCH1|PTGS2|SOS1|TNF	-3.52885
Input ID	GO Biological Processes	19	GO:1904659	glucose transmembrane transport	-4.51238	10.0446	7.02587	23250	112	124	6	4.83871	1.92701	2931|3553|3630|3643|5562|7124	GSK3A|IL1B|INS|INSR|PRKAA1|TNF	-3.52885
Input ID	GO Biological Processes	19	GO:0002274	myeloid leukocyte activation	-4.50515	3.88756	5.36726	23250	627	124	13	10.4839	2.75106	102|177|351|823|3146|3320|4137|5294|5663|6279|6280|6622|7099	ADAM10|AGER|APP|CAPN1|HMGB1|HSP90AA1|MAPT|PIK3CG|PSEN1|S100A8|S100A9|SNCA|TLR4	-3.52277
Input ID	GO Biological Processes	19	GO:0071888	macrophage apoptotic process	-4.50238	46.875	11.6394	23250	12	124	3	2.41935	1.37981	1029|1234|23411	CDKN2A|CCR5|SIRT1	-3.52122
Input ID	GO Biological Processes	19	GO:0050755	chemokine metabolic process	-4.50238	46.875	11.6394	23250	12	124	3	2.41935	1.37981	3553|3569|7124	IL1B|IL6|TNF	-3.52122
Input ID	GO Biological Processes	19	GO:1902993	positive regulation of amyloid precursor protein catabolic process	-4.50238	46.875	11.6394	23250	12	124	3	2.41935	1.37981	351|2931|54103	APP|GSK3A|GSAP	-3.52122
Input ID	GO Biological Processes	19	GO:0070486	leukocyte aggregation	-4.50238	46.875	11.6394	23250	12	124	3	2.41935	1.37981	3553|6279|6280	IL1B|S100A8|S100A9	-3.52122
Input ID	GO Biological Processes	19	GO:0042033	chemokine biosynthetic process	-4.50238	46.875	11.6394	23250	12	124	3	2.41935	1.37981	3553|3569|7124	IL1B|IL6|TNF	-3.52122
Input ID	GO Biological Processes	19	GO:0019896	axonal transport of mitochondrion	-4.50238	46.875	11.6394	23250	12	124	3	2.41935	1.37981	4137|7345|9638	MAPT|UCHL1|FEZ1	-3.52122
Input ID	GO Biological Processes	19	GO:0090279	regulation of calcium ion import	-4.50062	22.0588	8.99793	23250	34	124	4	3.22581	1.58668	846|1499|1950|5621	CASR|CTNNB1|EGF|PRNP	-3.51987
Input ID	GO Biological Processes	19	GO:0006695	cholesterol biosynthetic process	-4.49889	13.7868	7.73219	23250	68	124	5	4.03226	1.76655	338|348|1718|5562|6647	APOB|APOE|DHCR24|PRKAA1|SOD1	-3.51894
Input ID	GO Biological Processes	19	GO:0060998	regulation of dendritic spine development	-4.49889	13.7868	7.73219	23250	68	124	5	4.03226	1.76655	348|2475|5663|5802|80823	APOE|MTOR|PSEN1|PTPRS|BHLHB9	-3.51894
Input ID	Reactome Gene Sets	6	R-HSA-2219530	Constitutive Signaling by Aberrant PI3K in Cancer	-4.49889	13.7868	7.73219	23250	68	124	5	4.03226	1.76655	1950|1956|2099|2100|9365	EGF|EGFR|ESR1|ESR2|KL	-3.51894
Input ID	Reactome Gene Sets	6	R-HSA-3371453	Regulation of HSF1-mediated heat shock response	-4.49889	13.7868	7.73219	23250	68	124	5	4.03226	1.76655	2932|3313|9531|23411|57805	GSK3B|HSPA9|BAG3|SIRT1|CCAR2	-3.51894
Input ID	GO Biological Processes	19	GO:0008544	epidermis development	-4.49595	4.55298	5.59198	23250	453	124	11	8.87097	2.55331	488|823|1499|1956|3643|4851|5465|6647|6654|7124|28514	ATP2A2|CAPN1|CTNNB1|EGFR|INSR|NOTCH1|PPARA|SOD1|SOS1|TNF|DLL1	-3.51641
Input ID	GO Biological Processes	19	GO:0030324	lung development	-4.4901	7.85928	6.51409	23250	167	124	7	5.64516	2.07257	1499|1956|3146|3845|4851|5534|7124	CTNNB1|EGFR|HMGB1|KRAS|NOTCH1|PPP3R1|TNF	-3.51157
Input ID	GO Biological Processes	19	GO:0002694	regulation of leukocyte activation	-4.48363	4.16667	5.45197	23250	540	124	12	9.67742	2.65502	177|351|1499|3146|3553|3569|5074|5621|6622|6647|6654|7099	AGER|APP|CTNNB1|HMGB1|IL1B|IL6|PAWR|PRNP|SNCA|SOD1|SOS1|TLR4	-3.50631
Input ID	GO Biological Processes	19	GO:0006986	response to unfolded protein	-4.47352	7.8125	6.48914	23250	168	124	7	5.64516	2.07257	2931|3313|3316|3320|4000|5071|10273	GSK3A|HSPA9|HSPB2|HSP90AA1|LMNA|PRKN|STUB1	-3.49721
Input ID	GO Biological Processes	19	GO:0016570	histone modification	-4.46989	4.52303	5.56353	23250	456	124	11	8.87097	2.55331	672|1386|1499|1789|3553|5562|6622|10013|10891|23410|23411	BRCA1|ATF2|CTNNB1|DNMT3B|IL1B|PRKAA1|SNCA|HDAC6|PPARGC1A|SIRT3|SIRT1	-3.49438
Input ID	KEGG Pathway	24	hsa04920	Adipocytokine signaling pathway	-4.46807	13.587	7.66729	23250	69	124	5	4.03226	1.76655	2475|5465|5562|7124|10891	MTOR|PPARA|PRKAA1|TNF|PPARGC1A	-3.49315
Input ID	GO Biological Processes	19	GO:0046324	regulation of glucose import	-4.46807	13.587	7.66729	23250	69	124	5	4.03226	1.76655	2931|3630|3643|5562|7124	GSK3A|INS|INSR|PRKAA1|TNF	-3.49315
Input ID	GO Biological Processes	19	GO:0030217	T cell differentiation	-4.46306	6.49351	6.14434	23250	231	124	8	6.45161	2.20618	1499|3146|3553|3569|6647|6654|6868|7471	CTNNB1|HMGB1|IL1B|IL6|SOD1|SOS1|ADAM17|WNT1	-3.48854
Input ID	Reactome Gene Sets	6	R-HSA-109581	Apoptosis	-4.45706	7.76627	6.4644	23250	169	124	7	5.64516	2.07257	1499|3146|4000|4137|5534|7099|7157	CTNNB1|HMGB1|LMNA|MAPT|PPP3R1|TLR4|TP53	-3.48335
Input ID	GO Biological Processes	19	GO:0071870	cellular response to catecholamine stimulus	-4.44971	21.4286	8.85626	23250	35	124	4	3.22581	1.58668	351|5071|5566|6622	APP|PRKN|PRKACA|SNCA	-3.47838
Input ID	Canonical Pathways	11	M127	PID ERBB1 RECEPTOR PROXIMAL PATHWAY	-4.44971	21.4286	8.85626	23250	35	124	4	3.22581	1.58668	1950|1956|3845|6654	EGF|EGFR|KRAS|SOS1	-3.47838
Input ID	GO Biological Processes	19	GO:0031062	positive regulation of histone methylation	-4.44971	21.4286	8.85626	23250	35	124	4	3.22581	1.58668	672|1499|1789|23411	BRCA1|CTNNB1|DNMT3B|SIRT1	-3.47838
Input ID	GO Biological Processes	19	GO:0071868	cellular response to monoamine stimulus	-4.44971	21.4286	8.85626	23250	35	124	4	3.22581	1.58668	351|5071|5566|6622	APP|PRKN|PRKACA|SNCA	-3.47838
Input ID	GO Biological Processes	19	GO:0045667	regulation of osteoblast differentiation	-4.44758	9.78261	6.91354	23250	115	124	6	4.83871	1.92701	1499|3569|4077|4851|5566|7124	CTNNB1|IL6|NBR1|NOTCH1|PRKACA|TNF	-3.47665
Input ID	GO Biological Processes	19	GO:0050715	positive regulation of cytokine secretion	-4.44758	9.78261	6.91354	23250	115	124	6	4.83871	1.92701	3146|3552|3553|3630|7099|7124	HMGB1|IL1A|IL1B|INS|TLR4|TNF	-3.47665
Input ID	GO Biological Processes	19	GO:1904062	regulation of cation transmembrane transport	-4.44449	5.58775	5.87616	23250	302	124	9	7.25806	2.3299	274|351|823|5294|5566|5621|6622|10891|11315	BIN1|APP|CAPN1|PIK3CG|PRKACA|PRNP|SNCA|PPARGC1A|PARK7	-3.47388
Input ID	GO Biological Processes	19	GO:0002253	activation of immune response	-4.44142	3.83255	5.30371	23250	636	124	13	10.4839	2.75106	338|2099|3146|3320|3845|5074|5566|5621|5663|5802|6279|6280|7099	APOB|ESR1|HMGB1|HSP90AA1|KRAS|PAWR|PRKACA|PRNP|PSEN1|PTPRS|S100A8|S100A9|TLR4	-3.47168
Input ID	GO Biological Processes	19	GO:1902275	regulation of chromatin organization	-4.4407	7.72059	6.43986	23250	170	124	7	5.64516	2.07257	672|1499|1789|3553|6622|10891|23411	BRCA1|CTNNB1|DNMT3B|IL1B|SNCA|PPARGC1A|SIRT1	-3.47116
Input ID	GO Biological Processes	19	GO:1902653	secondary alcohol biosynthetic process	-4.43773	13.3929	7.60373	23250	70	124	5	4.03226	1.76655	338|348|1718|5562|6647	APOB|APOE|DHCR24|PRKAA1|SOD1	-3.46858
Input ID	GO Biological Processes	19	GO:0050863	regulation of T cell activation	-4.43333	5.56931	5.86235	23250	303	124	9	7.25806	2.3299	177|1499|3146|3553|3569|5074|5621|6647|6654	AGER|CTNNB1|HMGB1|IL1B|IL6|PAWR|PRNP|SOD1|SOS1	-3.46458
Input ID	GO Biological Processes	19	GO:0030323	respiratory tube development	-4.42446	7.67544	6.41552	23250	171	124	7	5.64516	2.07257	1499|1956|3146|3845|4851|5534|7124	CTNNB1|EGFR|HMGB1|KRAS|NOTCH1|PPP3R1|TNF	-3.45649
Input ID	GO Biological Processes	19	GO:0090092	regulation of transmembrane receptor protein serine/threonine kinase signaling pathway	-4.4233	6.41026	6.09079	23250	234	124	8	6.45161	2.20618	1030|4851|5300|5654|6868|7471|10273|23411	CDKN2B|NOTCH1|PIN1|HTRA1|ADAM17|WNT1|STUB1|SIRT1	-3.45553
Input ID	GO Biological Processes	19	GO:1901990	regulation of mitotic cell cycle phase transition	-4.42271	4.93421	5.66212	23250	380	124	10	8.06452	2.44523	328|351|672|1029|1030|1956|3320|5566|6868|7157	APEX1|APP|BRCA1|CDKN2A|CDKN2B|EGFR|HSP90AA1|PRKACA|ADAM17|TP53	-3.45514
Input ID	GO Biological Processes	19	GO:0051224	negative regulation of protein transport	-4.40832	7.63081	6.39138	23250	172	124	7	5.64516	2.07257	3553|3630|5071|7124|7351|9531|11315	IL1B|INS|PRKN|TNF|UCP2|BAG3|PARK7	-3.44264
Input ID	Reactome Gene Sets	6	R-HSA-5357801	Programmed Cell Death	-4.40832	7.63081	6.39138	23250	172	124	7	5.64516	2.07257	1499|3146|4000|4137|5534|7099|7157	CTNNB1|HMGB1|LMNA|MAPT|PPP3R1|TLR4|TP53	-3.44264
Input ID	GO Biological Processes	19	GO:0006970	response to osmotic stress	-4.40786	13.2042	7.54145	23250	71	124	5	4.03226	1.76655	1386|1956|5243|5743|7124	ATF2|EGFR|ABCB1|PTGS2|TNF	-3.44264
Input ID	GO Biological Processes	19	GO:0006096	glycolytic process	-4.40786	13.2042	7.54145	23250	71	124	5	4.03226	1.76655	3630|3643|5465|5562|10891	INS|INSR|PPARA|PRKAA1|PPARGC1A	-3.44264
Input ID	GO Biological Processes	19	GO:0090398	cellular senescence	-4.40786	13.2042	7.54145	23250	71	124	5	4.03226	1.76655	1029|3845|5074|7157|23411	CDKN2A|KRAS|PAWR|TP53|SIRT1	-3.44264
Input ID	GO Biological Processes	19	GO:1903524	positive regulation of blood circulation	-4.40786	13.2042	7.54145	23250	71	124	5	4.03226	1.76655	488|846|1956|2931|5743	ATP2A2|CASR|EGFR|GSK3A|PTGS2	-3.44264
Input ID	GO Biological Processes	19	GO:1901099	negative regulation of signal transduction in absence of ligand	-4.40034	20.8333	8.72037	23250	36	124	4	3.22581	1.58668	2537|3552|3553|7124	IFI6|IL1A|IL1B|TNF	-3.43571
Input ID	GO Biological Processes	19	GO:2001240	negative regulation of extrinsic apoptotic signaling pathway in absence of ligand	-4.40034	20.8333	8.72037	23250	36	124	4	3.22581	1.58668	2537|3552|3553|7124	IFI6|IL1A|IL1B|TNF	-3.43571
Input ID	GO Biological Processes	19	GO:0072659	protein localization to plasma membrane	-4.39712	6.35593	6.05561	23250	236	124	8	6.45161	2.20618	682|1956|3630|4035|5621|7124|8878|10519	BSG|EGFR|INS|LRP1|PRNP|TNF|SQSTM1|CIB1	-3.43269
Input ID	GO Biological Processes	19	GO:0048285	organelle fission	-4.39298	4.43548	5.47965	23250	465	124	11	8.87097	2.55331	1950|3552|3553|3630|3643|4137|5037|5071|5300|8678|10891	EGF|IL1A|IL1B|INS|INSR|MAPT|PEBP1|PRKN|PIN1|BECN1|PPARGC1A	-3.42991
Input ID	KEGG Pathway	24	hsa05164	Influenza A	-4.39228	7.58671	6.36743	23250	173	124	7	5.64516	2.07257	1386|2932|3552|3553|3569|7099|7124	ATF2|GSK3B|IL1A|IL1B|IL6|TLR4|TNF	-3.42941
Input ID	GO Biological Processes	19	GO:0090494	dopamine uptake	-4.39013	43.2692	11.1627	23250	13	124	3	2.41935	1.37981	5071|6622|11315	PRKN|SNCA|PARK7	-3.42823
Input ID	Reactome Gene Sets	6	R-HSA-879415	Advanced glycosylation endproduct receptor signaling	-4.39013	43.2692	11.1627	23250	13	124	3	2.41935	1.37981	177|351|3146	AGER|APP|HMGB1	-3.42823
Input ID	GO Biological Processes	19	GO:1901298	regulation of hydrogen peroxide-mediated programmed cell death	-4.39013	43.2692	11.1627	23250	13	124	3	2.41935	1.37981	5074|10013|11315	PAWR|HDAC6|PARK7	-3.42823
Input ID	GO Biological Processes	19	GO:0031650	regulation of heat generation	-4.39013	43.2692	11.1627	23250	13	124	3	2.41935	1.37981	3553|5743|7124	IL1B|PTGS2|TNF	-3.42823
Input ID	GO Biological Processes	19	GO:0032675	regulation of interleukin-6 production	-4.38463	9.5339	6.80526	23250	118	124	6	4.83871	1.92701	3146|3552|3553|3569|7099|7124	HMGB1|IL1A|IL1B|IL6|TLR4|TNF	-3.42312
Input ID	GO Biological Processes	19	GO:0048872	homeostasis of number of cells	-4.38413	6.32911	6.03817	23250	237	124	8	6.45161	2.20618	3146|3313|3569|3845|4851|6647|6654|6868	HMGB1|HSPA9|IL6|KRAS|NOTCH1|SOD1|SOS1|ADAM17	-3.42281
Input ID	Reactome Gene Sets	6	R-HSA-422475	Axon guidance	-4.38367	4.06872	5.34808	23250	553	124	12	9.67742	2.65502	102|1956|2932|3320|3845|3921|4313|5566|5621|5663|5664|6654	ADAM10|EGFR|GSK3B|HSP90AA1|KRAS|RPSA|MMP2|PRKACA|PRNP|PSEN1|PSEN2|SOS1	-3.42254
Input ID	GO Biological Processes	19	GO:0006757	ATP generation from ADP	-4.37845	13.0208	7.48041	23250	72	124	5	4.03226	1.76655	3630|3643|5465|5562|10891	INS|INSR|PPARA|PRKAA1|PPARGC1A	-3.41829
Input ID	GO Biological Processes	19	GO:0070509	calcium ion import	-4.37845	13.0208	7.48041	23250	72	124	5	4.03226	1.76655	488|846|1499|1950|5621	ATP2A2|CASR|CTNNB1|EGF|PRNP	-3.41829
Input ID	GO Biological Processes	19	GO:0007204	positive regulation of cytosolic calcium ion concentration	-4.37816	5.4789	5.7942	23250	308	124	9	7.25806	2.3299	1234|2099|2911|3146|3553|5294|5566|5621|6622	CCR5|ESR1|GRM1|HMGB1|IL1B|PIK3CG|PRKACA|PRNP|SNCA	-3.4182
Input ID	GO Biological Processes	19	GO:0050796	regulation of insulin secretion	-4.37636	7.5431	6.34367	23250	174	124	7	5.64516	2.07257	846|3553|4826|5071|7124|7351|23410	CASR|IL1B|NNAT|PRKN|TNF|UCP2|SIRT3	-3.41717
Input ID	GO Biological Processes	19	GO:0003018	vascular process in circulatory system	-4.37636	7.5431	6.34367	23250	174	124	7	5.64516	2.07257	151|348|846|1956|3630|5743|6647	ADRA2B|APOE|CASR|EGFR|INS|PTGS2|SOD1	-3.41717
Input ID	GO Biological Processes	19	GO:0007173	epidermal growth factor receptor signaling pathway	-4.36404	9.45378	6.77002	23250	119	124	6	4.83871	1.92701	351|1950|1956|5663|6654|6868	APP|EGF|EGFR|PSEN1|SOS1|ADAM17	-3.4065
Input ID	KEGG Pathway	24	hsa04722	Neurotrophin signaling pathway	-4.36404	9.45378	6.77002	23250	119	124	6	4.83871	1.92701	2932|3845|5663|5664|6654|7157	GSK3B|KRAS|PSEN1|PSEN2|SOS1|TP53	-3.4065
Input ID	GO Biological Processes	19	GO:0006638	neutral lipid metabolic process	-4.36404	9.45378	6.77002	23250	119	124	6	4.83871	1.92701	338|341|348|5294|6622|23411	APOB|APOC1|APOE|PIK3CG|SNCA|SIRT1	-3.4065
Input ID	GO Biological Processes	19	GO:1903052	positive regulation of proteolysis involved in cellular protein catabolic process	-4.36404	9.45378	6.77002	23250	119	124	6	4.83871	1.92701	1950|2931|2932|5071|5663|10273	EGF|GSK3A|GSK3B|PRKN|PSEN1|STUB1	-3.4065
Input ID	GO Biological Processes	19	GO:0048771	tissue remodeling	-4.36053	7.5	6.3201	23250	175	124	7	5.64516	2.07257	177|823|1499|1956|3146|3552|3569	AGER|CAPN1|CTNNB1|EGFR|HMGB1|IL1A|IL6	-3.40346
Input ID	GO Biological Processes	19	GO:0032102	negative regulation of response to external stimulus	-4.35639	5.44355	5.76736	23250	310	124	9	7.25806	2.3299	177|348|3630|4851|5465|5468|5654|5802|6895	AGER|APOE|INS|NOTCH1|PPARA|PPARG|HTRA1|PTPRS|TARBP2	-3.39989
Input ID	Canonical Pathways	11	M14532	ST PHOSPHOINOSITIDE 3 KINASE PATHWAY	-4.35244	20.2703	8.58985	23250	37	124	4	3.22581	1.58668	1029|2931|2932|6654	CDKN2A|GSK3A|GSK3B|SOS1	-3.39614
Input ID	GO Biological Processes	19	GO:0072347	response to anesthetic	-4.34948	12.8425	7.42058	23250	73	124	5	4.03226	1.76655	1788|1789|2475|3553|6622	DNMT3A|DNMT3B|MTOR|IL1B|SNCA	-3.39375
Input ID	KEGG Pathway	24	hsa05140	Leishmaniasis	-4.34948	12.8425	7.42058	23250	73	124	5	4.03226	1.76655	3552|3553|5743|7099|7124	IL1A|IL1B|PTGS2|TLR4|TNF	-3.39375
Input ID	GO Biological Processes	19	GO:0104004	cellular response to environmental stimulus	-4.34557	5.42605	5.75402	23250	311	124	9	7.25806	2.3299	1410|1956|2911|3553|5743|7099|7157|9531|23411	CRYAB|EGFR|GRM1|IL1B|PTGS2|TLR4|TP53|BAG3|SIRT1	-3.39022
Input ID	GO Biological Processes	19	GO:0071214	cellular response to abiotic stimulus	-4.34557	5.42605	5.75402	23250	311	124	9	7.25806	2.3299	1410|1956|2911|3553|5743|7099|7157|9531|23411	CRYAB|EGFR|GRM1|IL1B|PTGS2|TLR4|TP53|BAG3|SIRT1	-3.39022
Input ID	GO Biological Processes	19	GO:0008645	hexose transmembrane transport	-4.34365	9.375	6.7352	23250	120	124	6	4.83871	1.92701	2931|3553|3630|3643|5562|7124	GSK3A|IL1B|INS|INSR|PRKAA1|TNF	-3.38868
Input ID	GO Biological Processes	19	GO:0098754	detoxification	-4.34365	9.375	6.7352	23250	120	124	6	4.83871	1.92701	348|5743|6280|6647|7124|11315	APOE|PTGS2|S100A9|SOD1|TNF|PARK7	-3.38868
Input ID	GO Biological Processes	19	GO:0060047	heart contraction	-4.33279	6.22407	5.96941	23250	241	124	8	6.45161	2.20618	274|488|2475|2931|5037|5294|5566|6647	BIN1|ATP2A2|MTOR|GSK3A|PEBP1|PIK3CG|PRKACA|SOD1	-3.37878
Input ID	GO Biological Processes	19	GO:0071560	cellular response to transforming growth factor beta stimulus	-4.33279	6.22407	5.96941	23250	241	124	8	6.45161	2.20618	1030|5300|5654|6868|7471|10273|10891|23411	CDKN2B|PIN1|HTRA1|ADAM17|WNT1|STUB1|PPARGC1A|SIRT1	-3.37878
Input ID	GO Biological Processes	19	GO:0031345	negative regulation of cell projection organization	-4.32919	7.41525	6.27352	23250	177	124	7	5.64516	2.07257	348|2931|4035|5621|5663|5802|10519	APOE|GSK3A|LRP1|PRNP|PSEN1|PTPRS|CIB1	-3.37547
Input ID	GO Biological Processes	19	GO:1900076	regulation of cellular response to insulin stimulus	-4.32094	12.6689	7.3619	23250	74	124	5	4.03226	1.76655	2931|3553|3630|5562|23411	GSK3A|IL1B|INS|PRKAA1|SIRT1	-3.36883
Input ID	GO Biological Processes	19	GO:0051170	import into nucleus	-4.31367	7.3736	6.2505	23250	178	124	7	5.64516	2.07257	4000|5534|5663|5743|7124|9531|23411	LMNA|PPP3R1|PSEN1|PTGS2|TNF|BAG3|SIRT1	-3.36214
Input ID	GO Biological Processes	19	GO:0002221	pattern recognition receptor signaling pathway	-4.31367	7.3736	6.2505	23250	178	124	7	5.64516	2.07257	338|2099|3146|5802|6279|6280|7099	APOB|ESR1|HMGB1|PTPRS|S100A8|S100A9|TLR4	-3.36214
Input ID	GO Biological Processes	19	GO:0071356	cellular response to tumor necrosis factor	-4.3075	6.17284	5.9356	23250	243	124	8	6.45161	2.20618	338|672|5071|6868|7124|10519|10891|23411	APOB|BRCA1|PRKN|ADAM17|TNF|CIB1|PPARGC1A|SIRT1	-3.35653
Input ID	GO Biological Processes	19	GO:2000142	regulation of DNA-templated transcription, initiation	-4.30593	19.7368	8.46437	23250	38	124	4	3.22581	1.58668	1499|2099|3146|7157	CTNNB1|ESR1|HMGB1|TP53	-3.35553
Input ID	GO Biological Processes	19	GO:0035315	hair cell differentiation	-4.30593	19.7368	8.46437	23250	38	124	4	3.22581	1.58668	1499|4851|6647|28514	CTNNB1|NOTCH1|SOD1|DLL1	-3.35553
Input ID	GO Biological Processes	19	GO:0031057	negative regulation of histone modification	-4.30593	19.7368	8.46437	23250	38	124	4	3.22581	1.58668	672|1789|6622|23411	BRCA1|DNMT3B|SNCA|SIRT1	-3.35553
Input ID	GO Biological Processes	19	GO:0015749	monosaccharide transmembrane transport	-4.30342	9.22131	6.66676	23250	122	124	6	4.83871	1.92701	2931|3553|3630|3643|5562|7124	GSK3A|IL1B|INS|INSR|PRKAA1|TNF	-3.35321
Input ID	KEGG Pathway	24	hsa05152	Tuberculosis	-4.29825	7.3324	6.22765	23250	179	124	7	5.64516	2.07257	3313|3552|3553|3569|5534|7099|7124	HSPA9|IL1A|IL1B|IL6|PPP3R1|TLR4|TNF	-3.34899
Input ID	GO Biological Processes	19	GO:0016126	sterol biosynthetic process	-4.29282	12.5	7.30435	23250	75	124	5	4.03226	1.76655	338|348|1718|5562|6647	APOB|APOE|DHCR24|PRKAA1|SOD1	-3.34412
Input ID	GO Biological Processes	19	GO:0042866	pyruvate biosynthetic process	-4.29282	12.5	7.30435	23250	75	124	5	4.03226	1.76655	3630|3643|5465|5562|10891	INS|INSR|PPARA|PRKAA1|PPARGC1A	-3.34412
Input ID	GO Biological Processes	19	GO:0008344	adult locomotory behavior	-4.29282	12.5	7.30435	23250	75	124	5	4.03226	1.76655	351|5071|6622|7345|11315	APP|PRKN|SNCA|UCHL1|PARK7	-3.34412
Input ID	GO Biological Processes	19	GO:0090493	catecholamine uptake	-4.28709	40.1786	10.7373	23250	14	124	3	2.41935	1.37981	5071|6622|11315	PRKN|SNCA|PARK7	-3.33915
Input ID	GO Biological Processes	19	GO:0010885	regulation of cholesterol storage	-4.28709	40.1786	10.7373	23250	14	124	3	2.41935	1.37981	338|5465|5468	APOB|PPARA|PPARG	-3.33915
Input ID	GO Biological Processes	19	GO:0046321	positive regulation of fatty acid oxidation	-4.28709	40.1786	10.7373	23250	14	124	3	2.41935	1.37981	5465|5468|10891	PPARA|PPARG|PPARGC1A	-3.33915
Input ID	GO Biological Processes	19	GO:0034763	negative regulation of transmembrane transport	-4.28358	9.14634	6.63313	23250	123	124	6	4.83871	1.92701	274|2475|2931|3553|5562|7124	BIN1|MTOR|GSK3A|IL1B|PRKAA1|TNF	-3.33751
Input ID	GO Biological Processes	19	GO:0008217	regulation of blood pressure	-4.28293	7.29167	6.20499	23250	180	124	7	5.64516	2.07257	151|2931|5465|5468|5743|6647|28514	ADRA2B|GSK3A|PPARA|PPARG|PTGS2|SOD1|DLL1	-3.33723
Input ID	GO Biological Processes	19	GO:0050731	positive regulation of peptidyl-tyrosine phosphorylation	-4.28293	7.29167	6.20499	23250	180	124	7	5.64516	2.07257	1950|2475|3569|3630|5621|6868|7157	EGF|MTOR|IL6|INS|PRNP|ADAM17|TP53	-3.33723
Input ID	GO Biological Processes	19	GO:0045637	regulation of myeloid cell differentiation	-4.28244	6.12245	5.90218	23250	245	124	8	6.45161	2.20618	1499|2475|3146|3313|7099|7124|10519|28514	CTNNB1|MTOR|HMGB1|HSPA9|TLR4|TNF|CIB1|DLL1	-3.33693
Input ID	GO Biological Processes	19	GO:0001936	regulation of endothelial cell proliferation	-4.26771	7.25138	6.18249	23250	181	124	7	5.64516	2.07257	348|2475|3146|5468|6868|7124|23411	APOE|MTOR|HMGB1|PPARG|ADAM17|TNF|SIRT1	-3.32369
Input ID	GO Biological Processes	19	GO:0033143	regulation of intracellular steroid hormone receptor signaling pathway	-4.26511	12.3355	7.24788	23250	76	124	5	4.03226	1.76655	672|2099|10013|11315|23411	BRCA1|ESR1|HDAC6|PARK7|SIRT1	-3.32165
Input ID	GO Biological Processes	19	GO:1900182	positive regulation of protein localization to nucleus	-4.26511	12.3355	7.24788	23250	76	124	5	4.03226	1.76655	3630|5663|5743|9531|11315	INS|PSEN1|PTGS2|BAG3|PARK7	-3.32165
Input ID	KEGG Pathway	24	hsa05133	Pertussis	-4.26511	12.3355	7.24788	23250	76	124	5	4.03226	1.76655	3552|3553|3569|7099|7124	IL1A|IL1B|IL6|TLR4|TNF	-3.32165
Input ID	GO Biological Processes	19	GO:0034219	carbohydrate transmembrane transport	-4.26392	9.07258	6.59987	23250	124	124	6	4.83871	1.92701	2931|3553|3630|3643|5562|7124	GSK3A|IL1B|INS|INSR|PRKAA1|TNF	-3.32102
Input ID	GO Biological Processes	19	GO:0060612	adipose tissue development	-4.26072	19.2308	8.34359	23250	39	124	4	3.22581	1.58668	846|1386|10891|23411	CASR|ATF2|PPARGC1A|SIRT1	-3.31894
Input ID	GO Biological Processes	19	GO:0030810	positive regulation of nucleotide biosynthetic process	-4.26072	19.2308	8.34359	23250	39	124	4	3.22581	1.58668	3630|3643|5562|10891	INS|INSR|PRKAA1|PPARGC1A	-3.31894
Input ID	GO Biological Processes	19	GO:1900373	positive regulation of purine nucleotide biosynthetic process	-4.26072	19.2308	8.34359	23250	39	124	4	3.22581	1.58668	3630|3643|5562|10891	INS|INSR|PRKAA1|PPARGC1A	-3.31894
Input ID	GO Biological Processes	19	GO:0071559	response to transforming growth factor beta	-4.25762	6.07287	5.86912	23250	247	124	8	6.45161	2.20618	1030|5300|5654|6868|7471|10273|10891|23411	CDKN2B|PIN1|HTRA1|ADAM17|WNT1|STUB1|PPARGC1A|SIRT1	-3.3164
Input ID	GO Biological Processes	19	GO:0060537	muscle tissue development	-4.25424	4.71106	5.46814	23250	398	124	10	8.06452	2.44523	1499|2475|2931|4000|4851|5300|5562|7490|10891|28514	CTNNB1|MTOR|GSK3A|LMNA|NOTCH1|PIN1|PRKAA1|WT1|PPARGC1A|DLL1	-3.31338
Input ID	GO Biological Processes	19	GO:0051147	regulation of muscle cell differentiation	-4.25258	7.21154	6.16017	23250	182	124	7	5.64516	2.07257	1499|2475|2931|4851|5300|23411|28514	CTNNB1|MTOR|GSK3A|NOTCH1|PIN1|SIRT1|DLL1	-3.31209
Input ID	GO Biological Processes	19	GO:0007249	I-kappaB kinase/NF-kappaB signaling	-4.2453	6.04839	5.85273	23250	248	124	8	6.45161	2.20618	1499|2099|3553|5071|7099|7124|8878|23411	CTNNB1|ESR1|IL1B|PRKN|TLR4|TNF|SQSTM1|SIRT1	-3.30574
Input ID	Reactome Gene Sets	6	R-HSA-381426	Regulation of Insulin-like Growth Factor (IGF) transport and uptake by Insulin-like Growth Factor Bi	-4.24444	9	6.567	23250	125	124	6	4.83871	1.92701	102|338|348|351|3569|4313	ADAM10|APOB|APOE|APP|IL6|MMP2	-3.30506
Input ID	GO Biological Processes	19	GO:0060420	regulation of heart growth	-4.2378	12.1753	7.19245	23250	77	124	5	4.03226	1.76655	2475|2931|4851|5300|7490	MTOR|GSK3A|NOTCH1|PIN1|WT1	-3.29934
Input ID	GO Biological Processes	19	GO:1905954	positive regulation of lipid localization	-4.2378	12.1753	7.19245	23250	77	124	5	4.03226	1.76655	338|348|3553|4035|23411	APOB|APOE|IL1B|LRP1|SIRT1	-3.29934
Input ID	GO Biological Processes	19	GO:0046031	ADP metabolic process	-4.2378	12.1753	7.19245	23250	77	124	5	4.03226	1.76655	3630|3643|5465|5562|10891	INS|INSR|PPARA|PRKAA1|PPARGC1A	-3.29934
Input ID	GO Biological Processes	19	GO:0031348	negative regulation of defense response	-4.23754	7.17213	6.13801	23250	183	124	7	5.64516	2.07257	177|348|3630|5465|5468|5654|6895	AGER|APOE|INS|PPARA|PPARG|HTRA1|TARBP2	-3.29927
Input ID	GO Biological Processes	19	GO:0003015	heart process	-4.23304	6.0241	5.83643	23250	249	124	8	6.45161	2.20618	274|488|2475|2931|5037|5294|5566|6647	BIN1|ATP2A2|MTOR|GSK3A|PEBP1|PIK3CG|PRKACA|SOD1	-3.29513
Input ID	GO Biological Processes	19	GO:0035270	endocrine system development	-4.22513	8.92857	6.53449	23250	126	124	6	4.83871	1.92701	2931|2932|3569|3643|7490|28514	GSK3A|GSK3B|IL6|INSR|WT1|DLL1	-3.28796
Input ID	GO Biological Processes	19	GO:0060359	response to ammonium ion	-4.22513	8.92857	6.53449	23250	126	124	6	4.83871	1.92701	1788|1789|2475|3553|5071|6622	DNMT3A|DNMT3B|MTOR|IL1B|PRKN|SNCA	-3.28796
Input ID	GO Biological Processes	19	GO:0007517	muscle organ development	-4.21806	4.66418	5.42661	23250	402	124	10	8.06452	2.44523	1410|1499|2475|2931|4851|5300|5562|7490|23411|28514	CRYAB|CTNNB1|MTOR|GSK3A|NOTCH1|PIN1|PRKAA1|WT1|SIRT1|DLL1	-3.2818
Input ID	GO Biological Processes	19	GO:0060999	positive regulation of dendritic spine development	-4.21675	18.75	8.22723	23250	40	124	4	3.22581	1.58668	348|2475|5663|80823	APOE|MTOR|PSEN1|BHLHB9	-3.28123
Input ID	GO Biological Processes	19	GO:1901985	positive regulation of protein acetylation	-4.21675	18.75	8.22723	23250	40	124	4	3.22581	1.58668	672|3553|5562|10891	BRCA1|IL1B|PRKAA1|PPARGC1A	-3.28123
Input ID	GO Biological Processes	19	GO:0031648	protein destabilization	-4.21675	18.75	8.22723	23250	40	124	4	3.22581	1.58668	5071|5621|6622|23411	PRKN|PRNP|SNCA|SIRT1	-3.28123
Input ID	GO Biological Processes	19	GO:1903146	regulation of autophagy of mitochondrion	-4.21675	18.75	8.22723	23250	40	124	4	3.22581	1.58668	2931|5071|10013|11315	GSK3A|PRKN|HDAC6|PARK7	-3.28123
Input ID	Reactome Gene Sets	6	R-HSA-74752	Signaling by Insulin receptor	-4.21087	12.0192	7.13805	23250	78	124	5	4.03226	1.76655	3630|3643|3845|6654|9365	INS|INSR|KRAS|SOS1|KL	-3.27699
Input ID	GO Biological Processes	19	GO:0071260	cellular response to mechanical stimulus	-4.21087	12.0192	7.13805	23250	78	124	5	4.03226	1.76655	1956|3553|5743|7099|9531	EGFR|IL1B|PTGS2|TLR4|BAG3	-3.27699
Input ID	GO Biological Processes	19	GO:0031100	animal organ regeneration	-4.21087	12.0192	7.13805	23250	78	124	5	4.03226	1.76655	1956|4851|5468|7351|7471	EGFR|NOTCH1|PPARG|UCP2|WNT1	-3.27699
Input ID	GO Biological Processes	19	GO:0021766	hippocampus development	-4.21087	12.0192	7.13805	23250	78	124	5	4.03226	1.76655	2932|5037|5802|7515|9638	GSK3B|PEBP1|PTPRS|XRCC1|FEZ1	-3.27699
Input ID	GO Biological Processes	19	GO:0032635	interleukin-6 production	-4.20599	8.85827	6.50233	23250	127	124	6	4.83871	1.92701	3146|3552|3553|3569|7099|7124	HMGB1|IL1A|IL1B|IL6|TLR4|TNF	-3.27284
Input ID	GO Biological Processes	19	GO:0097468	programmed cell death in response to reactive oxygen species	-4.19187	37.5	10.3545	23250	15	124	3	2.41935	1.37981	5074|10013|11315	PAWR|HDAC6|PARK7	-3.26027
Input ID	Canonical Pathways	11	M201	PID ERBB NETWORK PATHWAY	-4.19187	37.5	10.3545	23250	15	124	3	2.41935	1.37981	1950|1956|3320	EGF|EGFR|HSP90AA1	-3.26027
Input ID	GO Biological Processes	19	GO:0010875	positive regulation of cholesterol efflux	-4.19187	37.5	10.3545	23250	15	124	3	2.41935	1.37981	348|4035|23411	APOE|LRP1|SIRT1	-3.26027
Input ID	GO Biological Processes	19	GO:0046325	negative regulation of glucose import	-4.19187	37.5	10.3545	23250	15	124	3	2.41935	1.37981	2931|5562|7124	GSK3A|PRKAA1|TNF	-3.26027
Input ID	GO Biological Processes	19	GO:0010421	hydrogen peroxide-mediated programmed cell death	-4.19187	37.5	10.3545	23250	15	124	3	2.41935	1.37981	5074|10013|11315	PAWR|HDAC6|PARK7	-3.26027
Input ID	GO Biological Processes	19	GO:0055088	lipid homeostasis	-4.18702	8.78906	6.47054	23250	128	124	6	4.83871	1.92701	338|348|3630|5468|5562|23411	APOB|APOE|INS|PPARG|PRKAA1|SIRT1	-3.25677
Input ID	GO Biological Processes	19	GO:0055007	cardiac muscle cell differentiation	-4.18702	8.78906	6.47054	23250	128	124	6	4.83871	1.92701	2475|2931|4000|5300|7490|28514	MTOR|GSK3A|LMNA|PIN1|WT1|DLL1	-3.25677
Input ID	GO Biological Processes	19	GO:0030177	positive regulation of Wnt signaling pathway	-4.18702	8.78906	6.47054	23250	128	124	6	4.83871	1.92701	1950|1956|5300|7471|51527|57805	EGF|EGFR|PIN1|WNT1|GSKIP|CCAR2	-3.25677
Input ID	GO Biological Processes	19	GO:0002690	positive regulation of leukocyte chemotaxis	-4.18432	11.8671	7.08463	23250	79	124	5	4.03226	1.76655	102|3146|3553|3569|6868	ADAM10|HMGB1|IL1B|IL6|ADAM17	-3.25461
Input ID	GO Biological Processes	19	GO:0034637	cellular carbohydrate biosynthetic process	-4.18432	11.8671	7.08463	23250	79	124	5	4.03226	1.76655	2475|2931|2932|3630|3643	MTOR|GSK3A|GSK3B|INS|INSR	-3.25461
Input ID	GO Biological Processes	19	GO:0042304	regulation of fatty acid biosynthetic process	-4.17396	18.2927	8.11501	23250	41	124	4	3.22581	1.58668	341|672|5743|23411	APOC1|BRCA1|PTGS2|SIRT1	-3.2455
Input ID	GO Biological Processes	19	GO:0043030	regulation of macrophage activation	-4.17396	18.2927	8.11501	23250	41	124	4	3.22581	1.58668	177|351|6622|7099	AGER|APP|SNCA|TLR4	-3.2455
Input ID	KEGG Pathway	24	hsa05332	Graft-versus-host disease	-4.17396	18.2927	8.11501	23250	41	124	4	3.22581	1.58668	3552|3553|3569|7124	IL1A|IL1B|IL6|TNF	-3.2455
Input ID	Canonical Pathways	11	M214	PID ERBB1 INTERNALIZATION PATHWAY	-4.17396	18.2927	8.11501	23250	41	124	4	3.22581	1.58668	1950|1956|3845|6654	EGF|EGFR|KRAS|SOS1	-3.2455
Input ID	GO Biological Processes	19	GO:0014065	phosphatidylinositol 3-kinase signaling	-4.16822	8.72093	6.43908	23250	129	124	6	4.83871	1.92701	1956|3480|3630|5294|8678|23411	EGFR|IGF1R|INS|PIK3CG|BECN1|SIRT1	-3.24084
Input ID	GO Biological Processes	19	GO:0045995	regulation of embryonic development	-4.16822	8.72093	6.43908	23250	129	124	6	4.83871	1.92701	1499|3643|4851|5566|7471|28514	CTNNB1|INSR|NOTCH1|PRKACA|WNT1|DLL1	-3.24084
Input ID	GO Biological Processes	19	GO:0030278	regulation of ossification	-4.16376	6.98138	6.02969	23250	188	124	7	5.64516	2.07257	1499|3569|4077|4851|5566|7124|9365	CTNNB1|IL6|NBR1|NOTCH1|PRKACA|TNF|KL	-3.23674
Input ID	GO Biological Processes	19	GO:0043536	positive regulation of blood vessel endothelial cell migration	-4.15814	11.7188	7.03216	23250	80	124	5	4.03226	1.76655	3146|5743|6868|10519|23411	HMGB1|PTGS2|ADAM17|CIB1|SIRT1	-3.23291
Input ID	GO Biological Processes	19	GO:0061097	regulation of protein tyrosine kinase activity	-4.15814	11.7188	7.03216	23250	80	124	5	4.03226	1.76655	351|1950|5621|5663|6868	APP|EGF|PRNP|PSEN1|ADAM17	-3.23291
Input ID	GO Biological Processes	19	GO:0046887	positive regulation of hormone secretion	-4.14958	8.65385	6.40797	23250	130	124	6	4.83871	1.92701	846|1956|3553|3630|4826|23410	CASR|EGFR|IL1B|INS|NNAT|SIRT3	-3.22542
Input ID	GO Biological Processes	19	GO:0007006	mitochondrial membrane organization	-4.14958	8.65385	6.40797	23250	130	124	6	4.83871	1.92701	1386|2931|2932|3320|6622|7157	ATF2|GSK3A|GSK3B|HSP90AA1|SNCA|TP53	-3.22542
Input ID	GO Biological Processes	19	GO:0003158	endothelium development	-4.14958	8.65385	6.40797	23250	130	124	6	4.83871	1.92701	1499|3553|4851|5802|7124|28514	CTNNB1|IL1B|NOTCH1|PTPRS|TNF|DLL1	-3.22542
Input ID	KEGG Pathway	24	hsa04380	Osteoclast differentiation	-4.14958	8.65385	6.40797	23250	130	124	6	4.83871	1.92701	3552|3553|5468|5534|7124|8878	IL1A|IL1B|PPARG|PPP3R1|TNF|SQSTM1	-3.22542
Input ID	GO Biological Processes	19	GO:0032436	positive regulation of proteasomal ubiquitin-dependent protein catabolic process	-4.13231	11.5741	6.98062	23250	81	124	5	4.03226	1.76655	2931|2932|5071|5663|10273	GSK3A|GSK3B|PRKN|PSEN1|STUB1	-3.21061
Input ID	GO Biological Processes	19	GO:0044106	cellular amine metabolic process	-4.13231	11.5741	6.98062	23250	81	124	5	4.03226	1.76655	3630|5037|5071|6622|11315	INS|PEBP1|PRKN|SNCA|PARK7	-3.21061
Input ID	Canonical Pathways	11	M232	PID ECADHERIN STABILIZATION PATHWAY	-4.13228	17.8571	8.00668	23250	42	124	4	3.22581	1.58668	1499|1950|1956|3480	CTNNB1|EGF|EGFR|IGF1R	-3.21061
Input ID	Reactome Gene Sets	6	R-HSA-2173782	Binding and Uptake of Ligands by Scavenger Receptors	-4.13228	17.8571	8.00668	23250	42	124	4	3.22581	1.58668	338|348|3320|4035	APOB|APOE|HSP90AA1|LRP1	-3.21061
Input ID	GO Biological Processes	19	GO:0007179	transforming growth factor beta receptor signaling pathway	-4.12056	6.87173	5.96657	23250	191	124	7	5.64516	2.07257	1030|5300|5654|6868|7471|10273|23411	CDKN2B|PIN1|HTRA1|ADAM17|WNT1|STUB1|SIRT1	-3.20012
Input ID	GO Biological Processes	19	GO:0010976	positive regulation of neuron projection development	-4.11351	5.79151	5.67813	23250	259	124	8	6.45161	2.20618	348|2475|4137|5071|5663|6280|9638|80823	APOE|MTOR|MAPT|PRKN|PSEN1|S100A9|FEZ1|BHLHB9	-3.19396
Input ID	GO Biological Processes	19	GO:0061041	regulation of wound healing	-4.11277	8.52273	6.34673	23250	132	124	6	4.83871	1.92701	177|348|2475|3146|6280|7099	AGER|APOE|MTOR|HMGB1|S100A9|TLR4	-3.19339
Input ID	Canonical Pathways	11	M115	PID REG GR PATHWAY	-4.10683	11.4329	6.92997	23250	82	124	5	4.03226	1.76655	2932|3320|3569|5566|7157	GSK3B|HSP90AA1|IL6|PRKACA|TP53	-3.18868
Input ID	GO Biological Processes	19	GO:0046323	glucose import	-4.10683	11.4329	6.92997	23250	82	124	5	4.03226	1.76655	2931|3630|3643|5562|7124	GSK3A|INS|INSR|PRKAA1|TNF	-3.18868
Input ID	GO Biological Processes	19	GO:0097306	cellular response to alcohol	-4.10683	11.4329	6.92997	23250	82	124	5	4.03226	1.76655	672|1499|1788|5468|5562	BRCA1|CTNNB1|DNMT3A|PPARG|PRKAA1	-3.18868
Input ID	GO Biological Processes	19	GO:0009749	response to glucose	-4.10634	6.83594	5.94584	23250	192	124	7	5.64516	2.07257	177|846|3553|5562|5566|7351|10891	AGER|CASR|IL1B|PRKAA1|PRKACA|UCP2|PPARGC1A	-3.18836
Input ID	GO Biological Processes	19	GO:1901987	regulation of cell cycle phase transition	-4.10348	4.51807	5.29531	23250	415	124	10	8.06452	2.44523	328|351|672|1029|1030|1956|3320|5566|6868|7157	APEX1|APP|BRCA1|CDKN2A|CDKN2B|EGFR|HSP90AA1|PRKACA|ADAM17|TP53	-3.18734
Input ID	GO Biological Processes	19	GO:0071871	response to epinephrine	-4.10339	35.1562	10.0076	23250	16	124	3	2.41935	1.37981	5566|6622|10891	PRKACA|SNCA|PPARGC1A	-3.18734
Input ID	GO Biological Processes	19	GO:0045898	regulation of RNA polymerase II transcriptional preinitiation complex assembly	-4.10339	35.1562	10.0076	23250	16	124	3	2.41935	1.37981	2099|3146|7157	ESR1|HMGB1|TP53	-3.18734
Input ID	GO Biological Processes	19	GO:1990845	adaptive thermogenesis	-4.10339	35.1562	10.0076	23250	16	124	3	2.41935	1.37981	7351|7352|10891	UCP2|UCP3|PPARGC1A	-3.18734
Input ID	GO Biological Processes	19	GO:0032930	positive regulation of superoxide anion generation	-4.10339	35.1562	10.0076	23250	16	124	3	2.41935	1.37981	1956|4137|6647	EGFR|MAPT|SOD1	-3.18734
Input ID	GO Biological Processes	19	GO:0045717	negative regulation of fatty acid biosynthetic process	-4.10339	35.1562	10.0076	23250	16	124	3	2.41935	1.37981	341|672|23411	APOC1|BRCA1|SIRT1	-3.18734
Input ID	GO Biological Processes	19	GO:0051571	positive regulation of histone H3-K4 methylation	-4.10339	35.1562	10.0076	23250	16	124	3	2.41935	1.37981	672|1499|1789	BRCA1|CTNNB1|DNMT3B	-3.18734
Input ID	GO Biological Processes	19	GO:1903798	regulation of production of miRNAs involved in gene silencing by miRNA	-4.10339	35.1562	10.0076	23250	16	124	3	2.41935	1.37981	1956|2099|6895	EGFR|ESR1|TARBP2	-3.18734
Input ID	GO Biological Processes	19	GO:0010878	cholesterol storage	-4.10339	35.1562	10.0076	23250	16	124	3	2.41935	1.37981	338|5465|5468	APOB|PPARA|PPARG	-3.18734
Input ID	Reactome Gene Sets	6	R-HSA-205043	NRIF signals cell death from the nucleus	-4.10339	35.1562	10.0076	23250	16	124	3	2.41935	1.37981	5663|5664|8878	PSEN1|PSEN2|SQSTM1	-3.18734
Input ID	GO Biological Processes	19	GO:0045165	cell fate commitment	-4.10186	5.76923	5.66276	23250	260	124	8	6.45161	2.20618	1499|3569|4851|5468|5663|7471|7490|28514	CTNNB1|IL6|NOTCH1|PPARG|PSEN1|WNT1|WT1|DLL1	-3.18634
Input ID	GO Biological Processes	19	GO:0097529	myeloid leukocyte migration	-4.09219	6.80052	5.92525	23250	193	124	7	5.64516	2.07257	3146|3552|3553|3569|5294|6279|6280	HMGB1|IL1A|IL1B|IL6|PIK3CG|S100A8|S100A9	-3.17771
Input ID	KEGG Pathway	24	hsa04940	Type I diabetes mellitus	-4.09166	17.4419	7.90203	23250	43	124	4	3.22581	1.58668	3552|3553|3630|7124	IL1A|IL1B|INS|TNF	-3.17771
Input ID	GO Biological Processes	19	GO:0106118	regulation of sterol biosynthetic process	-4.09166	17.4419	7.90203	23250	43	124	4	3.22581	1.58668	338|348|5562|6647	APOB|APOE|PRKAA1|SOD1	-3.17771
Input ID	GO Biological Processes	19	GO:0071827	plasma lipoprotein particle organization	-4.09166	17.4419	7.90203	23250	43	124	4	3.22581	1.58668	338|341|348|5566	APOB|APOC1|APOE|PRKACA	-3.17771
Input ID	GO Biological Processes	19	GO:0045540	regulation of cholesterol biosynthetic process	-4.09166	17.4419	7.90203	23250	43	124	4	3.22581	1.58668	338|348|5562|6647	APOB|APOE|PRKAA1|SOD1	-3.17771
Input ID	GO Biological Processes	19	GO:0007162	negative regulation of cell adhesion	-4.09026	5.74713	5.64747	23250	261	124	8	6.45161	2.20618	102|1029|3146|4851|5074|5465|5621|7471	ADAM10|CDKN2A|HMGB1|NOTCH1|PAWR|PPARA|PRNP|WNT1	-3.17665
Input ID	GO Biological Processes	19	GO:2000106	regulation of leukocyte apoptotic process	-4.08169	11.2952	6.8802	23250	83	124	5	4.03226	1.76655	1029|1234|6868|7157|23411	CDKN2A|CCR5|ADAM17|TP53|SIRT1	-3.17016
Input ID	GO Biological Processes	19	GO:0090559	regulation of membrane permeability	-4.08169	11.2952	6.8802	23250	83	124	5	4.03226	1.76655	1386|2475|2931|2932|7157	ATF2|MTOR|GSK3A|GSK3B|TP53	-3.17016
Input ID	KEGG Pathway	24	hsa05410	Hypertrophic cardiomyopathy (HCM)	-4.08169	11.2952	6.8802	23250	83	124	5	4.03226	1.76655	488|3569|4000|5562|7124	ATP2A2|IL6|LMNA|PRKAA1|TNF	-3.17016
Input ID	GO Biological Processes	19	GO:0051952	regulation of amine transport	-4.08169	11.2952	6.8802	23250	83	124	5	4.03226	1.76655	151|3553|5071|5663|6622	ADRA2B|IL1B|PRKN|PSEN1|SNCA	-3.17016
Input ID	GO Biological Processes	19	GO:0021700	developmental maturation	-4.07871	5.72519	5.63225	23250	262	124	8	6.45161	2.20618	351|1499|2475|4313|5037|5468|5566|7471	APP|CTNNB1|MTOR|MMP2|PEBP1|PPARG|PRKACA|WNT1	-3.16788
Input ID	GO Biological Processes	19	GO:0043542	endothelial cell migration	-4.07871	5.72519	5.63225	23250	262	124	8	6.45161	2.20618	348|3146|4851|5468|5743|6868|10519|23411	APOE|HMGB1|NOTCH1|PPARG|PTGS2|ADAM17|CIB1|SIRT1	-3.16788
Input ID	KEGG Pathway	24	hsa05162	Measles	-4.07659	8.39552	6.28677	23250	134	124	6	4.83871	1.92701	2932|3552|3553|3569|7099|7157	GSK3B|IL1A|IL1B|IL6|TLR4|TP53	-3.16636
Input ID	GO Biological Processes	19	GO:0030098	lymphocyte differentiation	-4.0682	4.9926	5.41434	23250	338	124	9	7.25806	2.3299	1499|3146|3553|3569|6647|6654|6868|7471|28514	CTNNB1|HMGB1|IL1B|IL6|SOD1|SOS1|ADAM17|WNT1|DLL1	-3.15858
Input ID	Reactome Gene Sets	6	R-HSA-381340	Transcriptional regulation of white adipocyte differentiation	-4.05688	11.1607	6.83126	23250	84	124	5	4.03226	1.76655	5465|5468|7124|7471|10891	PPARA|PPARG|TNF|WNT1|PPARGC1A	-3.1488
Input ID	GO Biological Processes	19	GO:0045601	regulation of endothelial cell differentiation	-4.05206	17.0455	7.80083	23250	44	124	4	3.22581	1.58668	1499|3553|4851|7124	CTNNB1|IL1B|NOTCH1|TNF	-3.14535
Input ID	GO Biological Processes	19	GO:0031018	endocrine pancreas development	-4.05206	17.0455	7.80083	23250	44	124	4	3.22581	1.58668	2931|2932|3569|28514	GSK3A|GSK3B|IL6|DLL1	-3.14535
Input ID	GO Biological Processes	19	GO:0051646	mitochondrion localization	-4.05206	17.0455	7.80083	23250	44	124	4	3.22581	1.58668	4137|7345|9638|10013	MAPT|UCHL1|FEZ1|HDAC6	-3.14535
Input ID	GO Biological Processes	19	GO:1903214	regulation of protein targeting to mitochondrion	-4.05206	17.0455	7.80083	23250	44	124	4	3.22581	1.58668	2931|5071|5562|9531	GSK3A|PRKN|PRKAA1|BAG3	-3.14535
Input ID	GO Biological Processes	19	GO:0032653	regulation of interleukin-10 production	-4.05206	17.0455	7.80083	23250	44	124	4	3.22581	1.58668	177|3146|7099|28514	AGER|HMGB1|TLR4|DLL1	-3.14535
Input ID	GO Biological Processes	19	GO:0061028	establishment of endothelial barrier	-4.05206	17.0455	7.80083	23250	44	124	4	3.22581	1.58668	1499|3553|5802|7124	CTNNB1|IL1B|PTPRS|TNF	-3.14535
Input ID	GO Biological Processes	19	GO:0061912	selective autophagy	-4.05206	17.0455	7.80083	23250	44	124	4	3.22581	1.58668	5071|8678|8878|10013	PRKN|BECN1|SQSTM1|HDAC6	-3.14535
Input ID	Canonical Pathways	11	M175	PID ERBB2 ERBB3 PATHWAY	-4.05206	17.0455	7.80083	23250	44	124	4	3.22581	1.58668	2475|3845|5566|6654	MTOR|KRAS|PRKACA|SOS1	-3.14535
Input ID	GO Biological Processes	19	GO:0001935	endothelial cell proliferation	-4.05027	6.69643	5.86436	23250	196	124	7	5.64516	2.07257	348|2475|3146|5468|6868|7124|23411	APOE|MTOR|HMGB1|PPARG|ADAM17|TNF|SIRT1	-3.14408
Input ID	GO Biological Processes	19	GO:0050663	cytokine secretion	-4.05027	6.69643	5.86436	23250	196	124	7	5.64516	2.07257	3146|3552|3553|3630|4851|7099|7124	HMGB1|IL1A|IL1B|INS|NOTCH1|TLR4|TNF	-3.14408
Input ID	GO Biological Processes	19	GO:0022412	cellular process involved in reproduction in multicellular organism	-4.04873	4.96324	5.39063	23250	340	124	9	7.25806	2.3299	1499|1788|2475|5037|5566|6654|6895|7490|10519	CTNNB1|DNMT3A|MTOR|PEBP1|PRKACA|SOS1|TARBP2|WT1|CIB1	-3.14304
Input ID	GO Biological Processes	19	GO:0051480	regulation of cytosolic calcium ion concentration	-4.04873	4.96324	5.39063	23250	340	124	9	7.25806	2.3299	1234|2099|2911|3146|3553|5294|5566|5621|6622	CCR5|ESR1|GRM1|HMGB1|IL1B|PIK3CG|PRKACA|PRNP|SNCA	-3.14304
Input ID	GO Biological Processes	19	GO:0050817	coagulation	-4.04873	4.96324	5.39063	23250	340	124	9	7.25806	2.3299	151|348|3569|5294|5566|5663|6280|7099|11216	ADRA2B|APOE|IL6|PIK3CG|PRKACA|PSEN1|S100A9|TLR4|AKAP10	-3.14304
Input ID	GO Biological Processes	19	GO:0009411	response to UV	-4.04101	8.27206	6.22805	23250	136	124	6	4.83871	1.92701	1956|5562|5743|7157|23411|57805	EGFR|PRKAA1|PTGS2|TP53|SIRT1|CCAR2	-3.13618
Input ID	GO Biological Processes	19	GO:0031333	negative regulation of protein complex assembly	-4.02344	8.21168	6.19914	23250	137	124	6	4.83871	1.92701	1410|2932|3146|3630|6622|11315	CRYAB|GSK3B|HMGB1|INS|SNCA|PARK7	-3.12132
Input ID	GO Biological Processes	19	GO:0035067	negative regulation of histone acetylation	-4.02076	33.0882	9.69126	23250	17	124	3	2.41935	1.37981	672|6622|23411	BRCA1|SNCA|SIRT1	-3.11949
Input ID	GO Biological Processes	19	GO:0098810	neurotransmitter reuptake	-4.02076	33.0882	9.69126	23250	17	124	3	2.41935	1.37981	5071|6622|11315	PRKN|SNCA|PARK7	-3.11949
Input ID	GO Biological Processes	19	GO:0051580	regulation of neurotransmitter uptake	-4.02076	33.0882	9.69126	23250	17	124	3	2.41935	1.37981	5071|5663|6622	PRKN|PSEN1|SNCA	-3.11949
Input ID	GO Biological Processes	19	GO:0031061	negative regulation of histone methylation	-4.02076	33.0882	9.69126	23250	17	124	3	2.41935	1.37981	672|1789|23411	BRCA1|DNMT3B|SIRT1	-3.11949
Input ID	Reactome Gene Sets	6	R-HSA-9034015	Signaling by NTRK3 (TRKC)	-4.02076	33.0882	9.69126	23250	17	124	3	2.41935	1.37981	3845|5802|6654	KRAS|PTPRS|SOS1	-3.11949
Input ID	GO Biological Processes	19	GO:0007178	transmembrane receptor protein serine/threonine kinase signaling pathway	-4.01977	4.91983	5.35541	23250	343	124	9	7.25806	2.3299	1030|4851|5300|5654|6868|7471|10273|11217|23411	CDKN2B|NOTCH1|PIN1|HTRA1|ADAM17|WNT1|STUB1|AKAP2|SIRT1	-3.11894
Input ID	GO Biological Processes	19	GO:2000772	regulation of cellular senescence	-4.01342	16.6667	7.70291	23250	45	124	4	3.22581	1.58668	1029|3845|5074|23411	CDKN2A|KRAS|PAWR|SIRT1	-3.11417
Input ID	GO Biological Processes	19	GO:0032757	positive regulation of interleukin-8 production	-4.01342	16.6667	7.70291	23250	45	124	4	3.22581	1.58668	3553|7099|7124|11315	IL1B|TLR4|TNF|PARK7	-3.11417
Input ID	GO Biological Processes	19	GO:0048806	genitalia development	-4.01342	16.6667	7.70291	23250	45	124	4	3.22581	1.58668	1499|1718|2099|7490	CTNNB1|DHCR24|ESR1|WT1	-3.11417
Input ID	GO Biological Processes	19	GO:1900449	regulation of glutamate receptor signaling pathway	-4.01342	16.6667	7.70291	23250	45	124	4	3.22581	1.58668	351|823|5621|10891	APP|CAPN1|PRNP|PPARGC1A	-3.11417
Input ID	GO Biological Processes	19	GO:2000725	regulation of cardiac muscle cell differentiation	-4.01342	16.6667	7.70291	23250	45	124	4	3.22581	1.58668	2475|2931|5300|28514	MTOR|GSK3A|PIN1|DLL1	-3.11417
Input ID	GO Biological Processes	19	GO:2000059	negative regulation of ubiquitin-dependent protein catabolic process	-4.01342	16.6667	7.70291	23250	45	124	4	3.22581	1.58668	5663|7471|11315|57805	PSEN1|WNT1|PARK7|CCAR2	-3.11417
Input ID	Canonical Pathways	11	M5883	NABA SECRETED FACTORS	-4.01019	4.90552	5.34376	23250	344	124	9	7.25806	2.3299	1950|3552|3553|3569|3630|6279|6280|7124|7471	EGF|IL1A|IL1B|IL6|INS|S100A8|S100A9|TNF|WNT1	-3.11144
Input ID	GO Biological Processes	19	GO:0001942	hair follicle development	-4.00823	10.9012	6.73583	23250	86	124	5	4.03226	1.76655	1499|1956|4851|6654|7124	CTNNB1|EGFR|NOTCH1|SOS1|TNF	-3.10999
Input ID	GO Biological Processes	19	GO:0007612	learning	-4.00601	8.15217	6.17052	23250	138	124	6	4.83871	1.92701	351|2475|3643|3845|5071|5743	APP|MTOR|INSR|KRAS|PRKN|PTGS2	-3.10828
Input ID	GO Biological Processes	19	GO:0030534	adult behavior	-4.00601	8.15217	6.17052	23250	138	124	6	4.83871	1.92701	351|5071|5465|6622|7345|11315	APP|PRKN|PPARA|SNCA|UCHL1|PARK7	-3.10828
Input ID	GO Biological Processes	19	GO:0009166	nucleotide catabolic process	-4.00601	8.15217	6.17052	23250	138	124	6	4.83871	1.92701	3630|3643|4968|5465|5562|10891	INS|INSR|OGG1|PPARA|PRKAA1|PPARGC1A	-3.10828
Input ID	GO Biological Processes	19	GO:0044772	mitotic cell cycle phase transition	-3.99713	4.00485	5.04943	23250	515	124	11	8.87097	2.55331	328|351|672|1029|1030|1956|3320|5243|5566|6868|7157	APEX1|APP|BRCA1|CDKN2A|CDKN2B|EGFR|HSP90AA1|ABCB1|PRKACA|ADAM17|TP53	-3.09989
Input ID	GO Biological Processes	19	GO:0046434	organophosphate catabolic process	-3.99552	6.5625	5.78512	23250	200	124	7	5.64516	2.07257	341|3630|3643|4968|5465|5562|10891	APOC1|INS|INSR|OGG1|PPARA|PRKAA1|PPARGC1A	-3.09862
Input ID	Reactome Gene Sets	6	R-HSA-446652	Interleukin-1 family signaling	-3.98873	8.09353	6.14218	23250	139	124	6	4.83871	1.92701	177|351|3146|3552|3553|8878	AGER|APP|HMGB1|IL1A|IL1B|SQSTM1	-3.09283
Input ID	GO Biological Processes	19	GO:0001837	epithelial to mesenchymal transition	-3.98873	8.09353	6.14218	23250	139	124	6	4.83871	1.92701	1499|2475|2932|3553|4851|5534	CTNNB1|MTOR|GSK3B|IL1B|NOTCH1|PPP3R1	-3.09283
Input ID	GO Biological Processes	19	GO:0042475	odontogenesis of dentin-containing tooth	-3.98436	10.7759	6.68929	23250	87	124	5	4.03226	1.76655	682|1386|1499|5465|5654	BSG|ATF2|CTNNB1|PPARA|HTRA1	-3.08963
Input ID	GO Biological Processes	19	GO:0045638	negative regulation of myeloid cell differentiation	-3.98436	10.7759	6.68929	23250	87	124	5	4.03226	1.76655	1499|3313|7099|10519|28514	CTNNB1|HSPA9|TLR4|CIB1|DLL1	-3.08963
Input ID	GO Biological Processes	19	GO:0007215	glutamate receptor signaling pathway	-3.98436	10.7759	6.68929	23250	87	124	5	4.03226	1.76655	351|823|2911|5621|10891	APP|CAPN1|GRM1|PRNP|PPARGC1A	-3.08963
Input ID	GO Biological Processes	19	GO:1990778	protein localization to cell periphery	-3.97707	5.53506	5.49876	23250	271	124	8	6.45161	2.20618	682|1956|3630|4035|5621|7124|8878|10519	BSG|EGFR|INS|LRP1|PRNP|TNF|SQSTM1|CIB1	-3.0825
Input ID	GO Biological Processes	19	GO:1901031	regulation of response to reactive oxygen species	-3.9757	16.3043	7.60808	23250	46	124	4	3.22581	1.58668	5074|7124|10013|11315	PAWR|TNF|HDAC6|PARK7	-3.08229
Input ID	GO Biological Processes	19	GO:0032613	interleukin-10 production	-3.9757	16.3043	7.60808	23250	46	124	4	3.22581	1.58668	177|3146|7099|28514	AGER|HMGB1|TLR4|DLL1	-3.08229
Input ID	GO Biological Processes	19	GO:0002067	glandular epithelial cell differentiation	-3.9757	16.3043	7.60808	23250	46	124	4	3.22581	1.58668	2931|2932|4851|28514	GSK3A|GSK3B|NOTCH1|DLL1	-3.08229
Input ID	KEGG Pathway	24	hsa04930	Type II diabetes mellitus	-3.9757	16.3043	7.60808	23250	46	124	4	3.22581	1.58668	2475|3630|3643|7124	MTOR|INS|INSR|TNF	-3.08229
Input ID	GO Biological Processes	19	GO:1903793	positive regulation of anion transport	-3.9757	16.3043	7.60808	23250	46	124	4	3.22581	1.58668	348|3553|5243|5663	APOE|IL1B|ABCB1|PSEN1	-3.08229
Input ID	GO Biological Processes	19	GO:0045599	negative regulation of fat cell differentiation	-3.9757	16.3043	7.60808	23250	46	124	4	3.22581	1.58668	3569|7124|7471|23411	IL6|TNF|WNT1|SIRT1	-3.08229
Input ID	GO Biological Processes	19	GO:0051188	cofactor biosynthetic process	-3.96602	5.51471	5.48429	23250	272	124	8	6.45161	2.20618	3630|3643|5465|5562|5743|6622|6647|10891	INS|INSR|PPARA|PRKAA1|PTGS2|SNCA|SOD1|PPARGC1A	-3.07378
Input ID	GO Biological Processes	19	GO:0006936	muscle contraction	-3.96277	4.83524	5.28617	23250	349	124	9	7.25806	2.3299	151|274|488|1410|2475|5294|5566|5743|6647	ADRA2B|BIN1|ATP2A2|CRYAB|MTOR|PIK3CG|PRKACA|PTGS2|SOD1	-3.0707
Input ID	GO Biological Processes	19	GO:0022404	molting cycle process	-3.9608	10.6534	6.6435	23250	88	124	5	4.03226	1.76655	1499|1956|4851|6654|7124	CTNNB1|EGFR|NOTCH1|SOS1|TNF	-3.06922
Input ID	GO Biological Processes	19	GO:0022405	hair cycle process	-3.9608	10.6534	6.6435	23250	88	124	5	4.03226	1.76655	1499|1956|4851|6654|7124	CTNNB1|EGFR|NOTCH1|SOS1|TNF	-3.06922
Input ID	Reactome Gene Sets	6	R-HSA-73887	Death Receptor Signalling	-3.95458	7.97872	6.08636	23250	141	124	6	4.83871	1.92701	5663|5664|6654|6868|7124|8878	PSEN1|PSEN2|SOS1|ADAM17|TNF|SQSTM1	-3.06349
Input ID	GO Biological Processes	19	GO:0007423	sensory organ development	-3.9529	3.95873	5.00146	23250	521	124	11	8.87097	2.55331	1410|1499|1956|3146|4851|5663|6647|6654|7471|7490|28514	CRYAB|CTNNB1|EGFR|HMGB1|NOTCH1|PSEN1|SOD1|SOS1|WNT1|WT1|DLL1	-3.06215
Input ID	GO Biological Processes	19	GO:0006349	regulation of gene expression by genetic imprinting	-3.94328	31.25	9.40115	23250	18	124	3	2.41935	1.37981	672|1788|2931	BRCA1|DNMT3A|GSK3A	-3.05449
Input ID	Canonical Pathways	11	M31	PID BETA CATENIN DEG PATHWAY	-3.94328	31.25	9.40115	23250	18	124	3	2.41935	1.37981	1499|2931|2932	CTNNB1|GSK3A|GSK3B	-3.05449
Input ID	GO Biological Processes	19	GO:0045821	positive regulation of glycolytic process	-3.94328	31.25	9.40115	23250	18	124	3	2.41935	1.37981	3630|3643|5562	INS|INSR|PRKAA1	-3.05449
Input ID	GO Biological Processes	19	GO:0070875	positive regulation of glycogen metabolic process	-3.94328	31.25	9.40115	23250	18	124	3	2.41935	1.37981	3146|3630|3643	HMGB1|INS|INSR	-3.05449
Input ID	GO Biological Processes	19	GO:0071371	cellular response to gonadotropin stimulus	-3.94328	31.25	9.40115	23250	18	124	3	2.41935	1.37981	4851|7490|10891	NOTCH1|WT1|PPARGC1A	-3.05449
Input ID	GO Biological Processes	19	GO:2000310	regulation of NMDA receptor activity	-3.94328	31.25	9.40115	23250	18	124	3	2.41935	1.37981	351|823|10891	APP|CAPN1|PPARGC1A	-3.05449
Input ID	GO Biological Processes	19	GO:0010310	regulation of hydrogen peroxide metabolic process	-3.94328	31.25	9.40115	23250	18	124	3	2.41935	1.37981	4314|6622|10013	MMP3|SNCA|HDAC6	-3.05449
Input ID	GO Biological Processes	19	GO:0070920	regulation of production of small RNA involved in gene silencing by RNA	-3.94328	31.25	9.40115	23250	18	124	3	2.41935	1.37981	1956|2099|6895	EGFR|ESR1|TARBP2	-3.05449
Input ID	Canonical Pathways	11	M236	PID DELTA NP63 PATHWAY	-3.93885	15.9574	7.51618	23250	47	124	4	3.22581	1.58668	1029|2932|3552|4851	CDKN2A|GSK3B|IL1A|NOTCH1	-3.05056
Input ID	GO Biological Processes	19	GO:1905268	negative regulation of chromatin organization	-3.93885	15.9574	7.51618	23250	47	124	4	3.22581	1.58668	672|1789|6622|23411	BRCA1|DNMT3B|SNCA|SIRT1	-3.05056
Input ID	GO Biological Processes	19	GO:0046496	nicotinamide nucleotide metabolic process	-3.93771	7.92254	6.05886	23250	142	124	6	4.83871	1.92701	3630|3643|5465|5562|5743|10891	INS|INSR|PPARA|PRKAA1|PTGS2|PPARGC1A	-3.05039
Input ID	GO Biological Processes	19	GO:0019362	pyridine nucleotide metabolic process	-3.93771	7.92254	6.05886	23250	142	124	6	4.83871	1.92701	3630|3643|5465|5562|5743|10891	INS|INSR|PPARA|PRKAA1|PTGS2|PPARGC1A	-3.05039
Input ID	GO Biological Processes	19	GO:0055006	cardiac cell development	-3.93753	10.5337	6.59843	23250	89	124	5	4.03226	1.76655	2475|2931|4000|4851|5300	MTOR|GSK3A|LMNA|NOTCH1|PIN1	-3.05039
Input ID	GO Biological Processes	19	GO:0044728	DNA methylation or demethylation	-3.93753	10.5337	6.59843	23250	89	124	5	4.03226	1.76655	328|672|1788|1789|2931	APEX1|BRCA1|DNMT3A|DNMT3B|GSK3A	-3.05039
Input ID	GO Biological Processes	19	GO:0006165	nucleoside diphosphate phosphorylation	-3.93753	10.5337	6.59843	23250	89	124	5	4.03226	1.76655	3630|3643|5465|5562|10891	INS|INSR|PPARA|PRKAA1|PPARGC1A	-3.05039
Input ID	GO Biological Processes	19	GO:0009308	amine metabolic process	-3.91455	10.4167	6.55408	23250	90	124	5	4.03226	1.76655	3630|5037|5071|6622|11315	INS|PEBP1|PRKN|SNCA|PARK7	-3.02855
Input ID	GO Biological Processes	19	GO:0015837	amine transport	-3.91455	10.4167	6.55408	23250	90	124	5	4.03226	1.76655	151|3553|5071|5663|6622	ADRA2B|IL1B|PRKN|PSEN1|SNCA	-3.02855
Input ID	GO Biological Processes	19	GO:0051271	negative regulation of cellular component movement	-3.90696	4.75352	5.2185	23250	355	124	9	7.25806	2.3299	274|328|348|3146|4035|4851|5300|5468|10891	BIN1|APEX1|APOE|HMGB1|LRP1|NOTCH1|PIN1|PPARG|PPARGC1A	-3.02177
Input ID	GO Biological Processes	19	GO:1901292	nucleoside phosphate catabolic process	-3.90436	7.8125	6.00466	23250	144	124	6	4.83871	1.92701	3630|3643|4968|5465|5562|10891	INS|INSR|OGG1|PPARA|PRKAA1|PPARGC1A	-3.01967
Input ID	KEGG Pathway	24	hsa05161	Hepatitis B	-3.90436	7.8125	6.00466	23250	144	124	6	4.83871	1.92701	1386|3569|3845|7099|7124|7157	ATF2|IL6|KRAS|TLR4|TNF|TP53	-3.01967
Input ID	GO Biological Processes	19	GO:0009267	cellular response to starvation	-3.90436	7.8125	6.00466	23250	144	124	6	4.83871	1.92701	2475|5562|7157|7351|8678|23411	MTOR|PRKAA1|TP53|UCP2|BECN1|SIRT1	-3.01967
Input ID	GO Biological Processes	19	GO:2001239	regulation of extrinsic apoptotic signaling pathway in absence of ligand	-3.90285	15.625	7.42705	23250	48	124	4	3.22581	1.58668	2537|3552|3553|7124	IFI6|IL1A|IL1B|TNF	-3.01884
Input ID	GO Biological Processes	19	GO:0010718	positive regulation of epithelial to mesenchymal transition	-3.90285	15.625	7.42705	23250	48	124	4	3.22581	1.58668	1499|2475|3553|4851	CTNNB1|MTOR|IL1B|NOTCH1	-3.01884
Input ID	GO Biological Processes	19	GO:0009179	purine ribonucleoside diphosphate metabolic process	-3.89185	10.3022	6.51042	23250	91	124	5	4.03226	1.76655	3630|3643|5465|5562|10891	INS|INSR|PPARA|PRKAA1|PPARGC1A	-3.0097
Input ID	GO Biological Processes	19	GO:0046939	nucleotide phosphorylation	-3.89185	10.3022	6.51042	23250	91	124	5	4.03226	1.76655	3630|3643|5465|5562|10891	INS|INSR|PPARA|PRKAA1|PPARGC1A	-3.0097
Input ID	GO Biological Processes	19	GO:0009135	purine nucleoside diphosphate metabolic process	-3.89185	10.3022	6.51042	23250	91	124	5	4.03226	1.76655	3630|3643|5465|5562|10891	INS|INSR|PPARA|PRKAA1|PPARGC1A	-3.0097
Input ID	GO Biological Processes	19	GO:0060191	regulation of lipase activity	-3.89185	10.3022	6.51042	23250	91	124	5	4.03226	1.76655	341|1956|2099|4035|6622	APOC1|EGFR|ESR1|LRP1|SNCA	-3.0097
Input ID	GO Biological Processes	19	GO:0051701	interaction with host	-3.88971	6.3101	5.63296	23250	208	124	7	5.64516	2.07257	1234|1499|1956|3416|3643|3921|5071	CCR5|CTNNB1|EGFR|IDE|INSR|RPSA|PRKN	-3.00809
Input ID	GO Biological Processes	19	GO:2000241	regulation of reproductive process	-3.88789	7.75862	5.97794	23250	145	124	6	4.83871	1.92701	1499|2099|3643|4851|7490|10519	CTNNB1|ESR1|INSR|NOTCH1|WT1|CIB1	-3.00665
Input ID	GO Biological Processes	19	GO:0010498	proteasomal protein catabolic process	-3.88713	4.2517	5.04823	23250	441	124	10	8.06452	2.44523	2931|2932|5071|5566|5663|7345|10273|11315|23411|57805	GSK3A|GSK3B|PRKN|PRKACA|PSEN1|UCHL1|STUB1|PARK7|SIRT1|CCAR2	-3.00615
Input ID	GO Biological Processes	19	GO:0044872	lipoprotein localization	-3.87033	29.6053	9.1338	23250	19	124	3	2.41935	1.37981	338|4035|5468	APOB|LRP1|PPARG	-2.99177
Input ID	GO Biological Processes	19	GO:0042953	lipoprotein transport	-3.87033	29.6053	9.1338	23250	19	124	3	2.41935	1.37981	338|4035|5468	APOB|LRP1|PPARG	-2.99177
Input ID	Canonical Pathways	11	M180	PID HIF1A PATHWAY	-3.87033	29.6053	9.1338	23250	19	124	3	2.41935	1.37981	1029|3320|7157	CDKN2A|HSP90AA1|TP53	-2.99177
Input ID	GO Biological Processes	19	GO:0051197	positive regulation of coenzyme metabolic process	-3.87033	29.6053	9.1338	23250	19	124	3	2.41935	1.37981	3630|3643|5562	INS|INSR|PRKAA1	-2.99177
Input ID	GO Biological Processes	19	GO:1903599	positive regulation of autophagy of mitochondrion	-3.87033	29.6053	9.1338	23250	19	124	3	2.41935	1.37981	5071|10013|11315	PRKN|HDAC6|PARK7	-2.99177
Input ID	GO Biological Processes	19	GO:0030813	positive regulation of nucleotide catabolic process	-3.87033	29.6053	9.1338	23250	19	124	3	2.41935	1.37981	3630|3643|5562	INS|INSR|PRKAA1	-2.99177
Input ID	GO Biological Processes	19	GO:0003323	type B pancreatic cell development	-3.87033	29.6053	9.1338	23250	19	124	3	2.41935	1.37981	2931|2932|28514	GSK3A|GSK3B|DLL1	-2.99177
Input ID	GO Biological Processes	19	GO:1900273	positive regulation of long-term synaptic potentiation	-3.87033	29.6053	9.1338	23250	19	124	3	2.41935	1.37981	351|3630|8878	APP|INS|SQSTM1	-2.99177
Input ID	GO Biological Processes	19	GO:0060039	pericardium development	-3.87033	29.6053	9.1338	23250	19	124	3	2.41935	1.37981	4851|6654|7490	NOTCH1|SOS1|WT1	-2.99177
Input ID	KEGG Pathway	24	hsa04912	GnRH signaling pathway	-3.86943	10.1902	6.46743	23250	92	124	5	4.03226	1.76655	1956|3845|4313|5566|6654	EGFR|KRAS|MMP2|PRKACA|SOS1	-2.99118
Input ID	GO Biological Processes	19	GO:0008585	female gonad development	-3.86943	10.1902	6.46743	23250	92	124	5	4.03226	1.76655	2099|3643|6647|7490|23411	ESR1|INSR|SOD1|WT1|SIRT1	-2.99118
Input ID	GO Biological Processes	19	GO:0042220	response to cocaine	-3.86765	15.3061	7.34056	23250	49	124	4	3.22581	1.58668	1788|1789|2475|6622	DNMT3A|DNMT3B|MTOR|SNCA	-2.98973
Input ID	GO Biological Processes	19	GO:2000677	regulation of transcription regulatory region DNA binding	-3.86765	15.3061	7.34056	23250	49	124	4	3.22581	1.58668	1499|5465|5663|11315	CTNNB1|PPARA|PSEN1|PARK7	-2.98973
Input ID	KEGG Pathway	24	hsa04015	Rap1 signaling pathway	-3.864	6.25	5.59616	23250	210	124	7	5.64516	2.07257	1499|1950|1956|3480|3630|3643|3845	CTNNB1|EGF|EGFR|IGF1R|INS|INSR|KRAS	-2.98639
Input ID	Reactome Gene Sets	6	R-HSA-416476	G alpha (q) signalling events	-3.864	6.25	5.59616	23250	210	124	7	5.64516	2.07257	351|846|1956|2911|3845|4314|6654	APP|CASR|EGFR|GRM1|KRAS|MMP3|SOS1	-2.98639
Input ID	GO Biological Processes	19	GO:0140014	mitotic nuclear division	-3.85815	5.31915	5.34348	23250	282	124	8	6.45161	2.20618	1950|3552|3553|3630|3643|5037|5300|8678	EGF|IL1A|IL1B|INS|INSR|PEBP1|PIN1|BECN1	-2.98103
Input ID	GO Biological Processes	19	GO:0016573	histone acetylation	-3.85532	7.65306	5.92528	23250	147	124	6	4.83871	1.92701	672|1386|3553|6622|10891|23411	BRCA1|ATF2|IL1B|SNCA|PPARGC1A|SIRT1	-2.97884
Input ID	GO Biological Processes	19	GO:0010977	negative regulation of neuron projection development	-3.85532	7.65306	5.92528	23250	147	124	6	4.83871	1.92701	348|2931|4035|5663|5802|10519	APOE|GSK3A|LRP1|PSEN1|PTPRS|CIB1	-2.97884
Input ID	Reactome Gene Sets	6	R-HSA-975138	TRAF6 mediated induction of NFkB and MAP kinases upon TLR7/8 or 9 activation	-3.84727	10.0806	6.4251	23250	93	124	5	4.03226	1.76655	177|351|1386|3146|7099	AGER|APP|ATF2|HMGB1|TLR4	-2.9719
Input ID	GO Biological Processes	19	GO:0009185	ribonucleoside diphosphate metabolic process	-3.84727	10.0806	6.4251	23250	93	124	5	4.03226	1.76655	3630|3643|5465|5562|10891	INS|INSR|PPARA|PRKAA1|PPARGC1A	-2.9719
Input ID	GO Biological Processes	19	GO:0030316	osteoclast differentiation	-3.84727	10.0806	6.4251	23250	93	124	5	4.03226	1.76655	1499|2475|7099|7124|9644	CTNNB1|MTOR|TLR4|TNF|SH3PXD2A	-2.9719
Input ID	GO Biological Processes	19	GO:0072080	nephron tubule development	-3.84727	10.0806	6.4251	23250	93	124	5	4.03226	1.76655	1499|4851|7471|7490|28514	CTNNB1|NOTCH1|WNT1|WT1|DLL1	-2.9719
Input ID	GO Biological Processes	19	GO:0001667	ameboidal-type cell migration	-3.83946	4.19463	4.99392	23250	447	124	10	8.06452	2.44523	348|2475|3146|4851|5468|5743|6868|10013|10519|23411	APOE|MTOR|HMGB1|NOTCH1|PPARG|PTGS2|ADAM17|HDAC6|CIB1|SIRT1	-2.96441
Input ID	GO Biological Processes	19	GO:0072524	pyridine-containing compound metabolic process	-3.83923	7.60135	5.89932	23250	148	124	6	4.83871	1.92701	3630|3643|5465|5562|5743|10891	INS|INSR|PPARA|PRKAA1|PTGS2|PPARGC1A	-2.96434
Input ID	GO Biological Processes	19	GO:0051972	regulation of telomerase activity	-3.83323	15	7.25658	23250	50	124	4	3.22581	1.58668	1499|3320|5468|7157	CTNNB1|HSP90AA1|PPARG|TP53	-2.95913
Input ID	GO Biological Processes	19	GO:0000186	activation of MAPKK activity	-3.83323	15	7.25658	23250	50	124	4	3.22581	1.58668	1950|1956|2911|5663	EGF|EGFR|GRM1|PSEN1	-2.95913
Input ID	Reactome Gene Sets	6	R-HSA-383280	Nuclear Receptor transcription pathway	-3.83323	15	7.25658	23250	50	124	4	3.22581	1.58668	2099|2100|5465|5468	ESR1|ESR2|PPARA|PPARG	-2.95913
Input ID	Reactome Gene Sets	6	R-HSA-168181	Toll Like Receptor 7/8 (TLR7/8) Cascade	-3.82537	9.9734	6.3834	23250	94	124	5	4.03226	1.76655	177|351|1386|3146|7099	AGER|APP|ATF2|HMGB1|TLR4	-2.9527
Input ID	GO Biological Processes	19	GO:0055024	regulation of cardiac muscle tissue development	-3.82537	9.9734	6.3834	23250	94	124	5	4.03226	1.76655	2475|2931|4851|5300|28514	MTOR|GSK3A|NOTCH1|PIN1|DLL1	-2.9527
Input ID	GO Biological Processes	19	GO:0090277	positive regulation of peptide hormone secretion	-3.82537	9.9734	6.3834	23250	94	124	5	4.03226	1.76655	846|1956|3630|4826|23410	CASR|EGFR|INS|NNAT|SIRT3	-2.9527
Input ID	GO Biological Processes	19	GO:0042035	regulation of cytokine biosynthetic process	-3.82537	9.9734	6.3834	23250	94	124	5	4.03226	1.76655	3552|3553|3569|7099|7124	IL1A|IL1B|IL6|TLR4|TNF	-2.9527
Input ID	GO Biological Processes	19	GO:0032649	regulation of interferon-gamma production	-3.82537	9.9734	6.3834	23250	94	124	5	4.03226	1.76655	3146|3553|5621|7099|7124	HMGB1|IL1B|PRNP|TLR4|TNF	-2.9527
Input ID	GO Biological Processes	19	GO:0035249	synaptic transmission, glutamatergic	-3.82537	9.9734	6.3834	23250	94	124	5	4.03226	1.76655	1956|2911|5071|5663|5743	EGFR|GRM1|PRKN|PSEN1|PTGS2	-2.9527
Input ID	Reactome Gene Sets	6	R-HSA-975155	MyD88 dependent cascade initiated on endosome	-3.82537	9.9734	6.3834	23250	94	124	5	4.03226	1.76655	177|351|1386|3146|7099	AGER|APP|ATF2|HMGB1|TLR4	-2.9527
Input ID	GO Biological Processes	19	GO:0009108	coenzyme biosynthetic process	-3.81341	6.13318	5.52398	23250	214	124	7	5.64516	2.07257	3630|3643|5465|5562|5743|6622|10891	INS|INSR|PPARA|PRKAA1|PTGS2|SNCA|PPARGC1A	-2.94248
Input ID	GO Biological Processes	19	GO:0051656	establishment of organelle localization	-3.80812	4.15743	4.95823	23250	451	124	10	8.06452	2.44523	488|1499|4137|5071|5294|5663|6622|7345|8678|9638	ATP2A2|CTNNB1|MAPT|PRKN|PIK3CG|PSEN1|SNCA|UCHL1|BECN1|FEZ1	-2.9375
Input ID	GO Biological Processes	19	GO:0010959	regulation of metal ion transport	-3.80756	4.61066	5.09828	23250	366	124	9	7.25806	2.3299	274|846|1499|1950|5294|5566|5621|5743|6622	BIN1|CASR|CTNNB1|EGF|PIK3CG|PRKACA|PRNP|PTGS2|SNCA	-2.93725
Input ID	GO Biological Processes	19	GO:0035967	cellular response to topologically incorrect protein	-3.8074	7.5	5.84811	23250	150	124	6	4.83871	1.92701	2931|3313|4000|5071|10013|10273	GSK3A|HSPA9|LMNA|PRKN|HDAC6|STUB1	-2.93725
Input ID	GO Biological Processes	19	GO:0001890	placenta development	-3.8074	7.5	5.84811	23250	150	124	6	4.83871	1.92701	682|1956|5468|5654|5743|6647	BSG|EGFR|PPARG|HTRA1|PTGS2|SOD1	-2.93725
Input ID	Reactome Gene Sets	6	R-HSA-1592230	Mitochondrial biogenesis	-3.80373	9.86842	6.34232	23250	95	124	5	4.03226	1.76655	1386|3313|5465|10891|23410	ATF2|HSPA9|PPARA|PPARGC1A|SIRT3	-2.93499
Input ID	GO Biological Processes	19	GO:0061326	renal tubule development	-3.80373	9.86842	6.34232	23250	95	124	5	4.03226	1.76655	1499|4851|7471|7490|28514	CTNNB1|NOTCH1|WNT1|WT1|DLL1	-2.93499
Input ID	Reactome Gene Sets	6	R-HSA-168188	Toll Like Receptor TLR6:TLR2 Cascade	-3.80373	9.86842	6.34232	23250	95	124	5	4.03226	1.76655	177|351|1386|3146|7099	AGER|APP|ATF2|HMGB1|TLR4	-2.93499
Input ID	Reactome Gene Sets	6	R-HSA-166058	MyD88:Mal cascade initiated on plasma membrane	-3.80373	9.86842	6.34232	23250	95	124	5	4.03226	1.76655	177|351|1386|3146|7099	AGER|APP|ATF2|HMGB1|TLR4	-2.93499
Input ID	GO Biological Processes	19	GO:0021549	cerebellum development	-3.80373	9.86842	6.34232	23250	95	124	5	4.03226	1.76655	5802|7471|7515|10891|28514	PTPRS|WNT1|XRCC1|PPARGC1A|DLL1	-2.93499
Input ID	GO Biological Processes	19	GO:0097756	negative regulation of blood vessel diameter	-3.80373	9.86842	6.34232	23250	95	124	5	4.03226	1.76655	151|846|1956|3630|5743	ADRA2B|CASR|EGFR|INS|PTGS2	-2.93499
Input ID	GO Biological Processes	19	GO:0047497	mitochondrion transport along microtubule	-3.80145	28.125	8.88634	23250	20	124	3	2.41935	1.37981	4137|7345|9638	MAPT|UCHL1|FEZ1	-2.93459
Input ID	GO Biological Processes	19	GO:2000757	negative regulation of peptidyl-lysine acetylation	-3.80145	28.125	8.88634	23250	20	124	3	2.41935	1.37981	672|6622|23411	BRCA1|SNCA|SIRT1	-2.93459
Input ID	GO Biological Processes	19	GO:0051570	regulation of histone H3-K9 methylation	-3.80145	28.125	8.88634	23250	20	124	3	2.41935	1.37981	672|1789|23411	BRCA1|DNMT3B|SIRT1	-2.93459
Input ID	GO Biological Processes	19	GO:0034643	establishment of mitochondrion localization, microtubule-mediated	-3.80145	28.125	8.88634	23250	20	124	3	2.41935	1.37981	4137|7345|9638	MAPT|UCHL1|FEZ1	-2.93459
Input ID	GO Biological Processes	19	GO:0051131	chaperone-mediated protein complex assembly	-3.80145	28.125	8.88634	23250	20	124	3	2.41935	1.37981	3320|10013|10273	HSP90AA1|HDAC6|STUB1	-2.93459
Input ID	GO Biological Processes	19	GO:0042069	regulation of catecholamine metabolic process	-3.80145	28.125	8.88634	23250	20	124	3	2.41935	1.37981	5071|6622|11315	PRKN|SNCA|PARK7	-2.93459
Input ID	GO Biological Processes	19	GO:0032928	regulation of superoxide anion generation	-3.80145	28.125	8.88634	23250	20	124	3	2.41935	1.37981	1956|4137|6647	EGFR|MAPT|SOD1	-2.93459
Input ID	Canonical Pathways	11	M90	PID WNT CANONICAL PATHWAY	-3.80145	28.125	8.88634	23250	20	124	3	2.41935	1.37981	1499|2931|2932	CTNNB1|GSK3A|GSK3B	-2.93459
Input ID	GO Biological Processes	19	GO:0051000	positive regulation of nitric-oxide synthase activity	-3.80145	28.125	8.88634	23250	20	124	3	2.41935	1.37981	348|3630|3845	APOE|INS|KRAS	-2.93459
Input ID	GO Biological Processes	19	GO:0042053	regulation of dopamine metabolic process	-3.80145	28.125	8.88634	23250	20	124	3	2.41935	1.37981	5071|6622|11315	PRKN|SNCA|PARK7	-2.93459
Input ID	GO Biological Processes	19	GO:0061050	regulation of cell growth involved in cardiac muscle cell development	-3.80145	28.125	8.88634	23250	20	124	3	2.41935	1.37981	2475|2931|5300	MTOR|GSK3A|PIN1	-2.93459
Input ID	GO Biological Processes	19	GO:0033189	response to vitamin A	-3.80145	28.125	8.88634	23250	20	124	3	2.41935	1.37981	1788|1789|5468	DNMT3A|DNMT3B|PPARG	-2.93459
Input ID	GO Biological Processes	19	GO:0044839	cell cycle G2/M phase transition	-3.80094	6.10465	5.50622	23250	215	124	7	5.64516	2.07257	351|672|1030|3320|5243|5566|7157	APP|BRCA1|CDKN2B|HSP90AA1|ABCB1|PRKACA|TP53	-2.93439
Input ID	GO Biological Processes	19	GO:0043122	regulation of I-kappaB kinase/NF-kappaB signaling	-3.80094	6.10465	5.50622	23250	215	124	7	5.64516	2.07257	1499|2099|3553|5071|7124|8878|23411	CTNNB1|ESR1|IL1B|PRKN|TNF|SQSTM1|SIRT1	-2.93439
Input ID	GO Biological Processes	19	GO:0060421	positive regulation of heart growth	-3.79954	14.7059	7.17497	23250	51	124	4	3.22581	1.58668	2475|4851|5300|7490	MTOR|NOTCH1|PIN1|WT1	-2.93424
Input ID	Reactome Gene Sets	6	R-HSA-3928665	EPH-ephrin mediated repulsion of cells	-3.79954	14.7059	7.17497	23250	51	124	4	3.22581	1.58668	102|4313|5663|5664	ADAM10|MMP2|PSEN1|PSEN2	-2.93424
Input ID	GO Biological Processes	19	GO:0055081	anion homeostasis	-3.79954	14.7059	7.17497	23250	51	124	4	3.22581	1.58668	348|3630|5562|23411	APOE|INS|PRKAA1|SIRT1	-2.93424
Input ID	KEGG Pathway	24	hsa05014	Amyotrophic lateral sclerosis (ALS)	-3.79954	14.7059	7.17497	23250	51	124	4	3.22581	1.58668	5534|6647|7124|7157	PPP3R1|SOD1|TNF|TP53	-2.93424
Input ID	Canonical Pathways	11	M7955	SIG INSULIN RECEPTOR PATHWAY IN CARDIAC MYOCYTES	-3.79954	14.7059	7.17497	23250	51	124	4	3.22581	1.58668	1029|2931|2932|6654	CDKN2A|GSK3A|GSK3B|SOS1	-2.93424
Input ID	GO Biological Processes	19	GO:0043900	regulation of multi-organism process	-3.78988	4.5856	5.07693	23250	368	124	9	7.25806	2.3299	348|3553|4851|5071|5654|6895|7124|8878|10519	APOE|IL1B|NOTCH1|PRKN|HTRA1|TARBP2|TNF|SQSTM1|CIB1	-2.9252
Input ID	GO Biological Processes	19	GO:1903037	regulation of leukocyte cell-cell adhesion	-3.78533	5.19031	5.24883	23250	289	124	8	6.45161	2.20618	177|3146|3553|3569|5074|5465|5621|7124	AGER|HMGB1|IL1B|IL6|PAWR|PPARA|PRNP|TNF	-2.92111
Input ID	KEGG Pathway	24	hsa04914	Progesterone-mediated oocyte maturation	-3.78234	9.76562	6.30185	23250	96	124	5	4.03226	1.76655	3320|3480|3630|3845|5566	HSP90AA1|IGF1R|INS|KRAS|PRKACA	-2.9189
Input ID	KEGG Pathway	24	hsa05146	Amoebiasis	-3.78234	9.76562	6.30185	23250	96	124	5	4.03226	1.76655	3553|3569|5566|7099|7124	IL1B|IL6|PRKACA|TLR4|TNF	-2.9189
Input ID	Reactome Gene Sets	6	R-HSA-8878159	Transcriptional regulation by RUNX3	-3.78234	9.76562	6.30185	23250	96	124	5	4.03226	1.76655	1029|1499|3845|4851|7157	CDKN2A|CTNNB1|KRAS|NOTCH1|TP53	-2.9189
Input ID	GO Biological Processes	19	GO:0001894	tissue homeostasis	-3.77619	6.04839	5.47104	23250	217	124	7	5.64516	2.07257	1499|1956|3569|3845|4851|6647|7099	CTNNB1|EGFR|IL6|KRAS|NOTCH1|SOD1|TLR4	-2.91339
Input ID	GO Biological Processes	19	GO:0018393	internal peptidyl-lysine acetylation	-3.77606	7.40132	5.79784	23250	152	124	6	4.83871	1.92701	672|1386|3553|6622|10891|23411	BRCA1|ATF2|IL1B|SNCA|PPARGC1A|SIRT1	-2.91339
Input ID	GO Biological Processes	19	GO:0034655	nucleobase-containing compound catabolic process	-3.77541	3.77747	4.80903	23250	546	124	11	8.87097	2.55331	328|2475|2931|3146|3630|3643|3921|4968|5465|5562|10891	APEX1|MTOR|GSK3A|HMGB1|INS|INSR|RPSA|OGG1|PPARA|PRKAA1|PPARGC1A	-2.9129
Input ID	Reactome Gene Sets	6	R-HSA-5683057	MAPK family signaling cascades	-3.77509	5.17241	5.23556	23250	290	124	8	6.45161	2.20618	1950|1956|3569|3845|5037|5566|6654|9365	EGF|EGFR|IL6|KRAS|PEBP1|PRKACA|SOS1|KL	-2.91274
Input ID	GO Biological Processes	19	GO:1901361	organic cyclic compound catabolic process	-3.77174	3.50467	4.71249	23250	642	124	12	9.67742	2.65502	328|348|2475|2931|3146|3630|3643|3921|4968|5465|5562|10891	APEX1|APOE|MTOR|GSK3A|HMGB1|INS|INSR|RPSA|OGG1|PPARA|PRKAA1|PPARGC1A	-2.90969
Input ID	GO Biological Processes	19	GO:0072678	T cell migration	-3.76656	14.4231	7.09563	23250	52	124	4	3.22581	1.58668	102|351|5294|6868	ADAM10|APP|PIK3CG|ADAM17	-2.90575
Input ID	Reactome Gene Sets	6	R-HSA-2428928	IRS-related events triggered by IGF1R	-3.76656	14.4231	7.09563	23250	52	124	4	3.22581	1.58668	3480|3845|6654|9365	IGF1R|KRAS|SOS1|KL	-2.90575
Input ID	GO Biological Processes	19	GO:0098930	axonal transport	-3.76656	14.4231	7.09563	23250	52	124	4	3.22581	1.58668	4137|6647|7345|9638	MAPT|SOD1|UCHL1|FEZ1	-2.90575
Input ID	Reactome Gene Sets	6	R-HSA-75153	Apoptotic execution phase	-3.76656	14.4231	7.09563	23250	52	124	4	3.22581	1.58668	1499|3146|4000|4137	CTNNB1|HMGB1|LMNA|MAPT	-2.90575
Input ID	GO Biological Processes	19	GO:0046545	development of primary female sexual characteristics	-3.7612	9.66495	6.26197	23250	97	124	5	4.03226	1.76655	2099|3643|6647|7490|23411	ESR1|INSR|SOD1|WT1|SIRT1	-2.90131
Input ID	Reactome Gene Sets	6	R-HSA-193704	p75 NTR receptor-mediated signalling	-3.7612	9.66495	6.26197	23250	97	124	5	4.03226	1.76655	5663|5664|6654|6868|8878	PSEN1|PSEN2|SOS1|ADAM17|SQSTM1	-2.90131
Input ID	GO Biological Processes	19	GO:0008643	carbohydrate transport	-3.76056	7.35294	5.77305	23250	153	124	6	4.83871	1.92701	2931|3553|3630|3643|5562|7124	GSK3A|IL1B|INS|INSR|PRKAA1|TNF	-2.90082
Input ID	GO Biological Processes	19	GO:0000226	microtubule cytoskeleton organization	-3.74799	3.75	4.77929	23250	550	124	11	8.87097	2.55331	672|1410|1499|2932|4000|4137|5300|5562|6622|10013|10519	BRCA1|CRYAB|CTNNB1|GSK3B|LMNA|MAPT|PIN1|PRKAA1|SNCA|HDAC6|CIB1	-2.88917
Input ID	GO Biological Processes	19	GO:0045055	regulated exocytosis	-3.74115	3.26305	4.6036	23250	747	124	13	10.4839	2.75106	102|351|488|823|1950|3146|3320|4851|5294|5663|6279|6280|6647	ADAM10|APP|ATP2A2|CAPN1|EGF|HMGB1|HSP90AA1|NOTCH1|PIK3CG|PSEN1|S100A8|S100A9|SOD1	-2.88295
Input ID	GO Biological Processes	19	GO:0019395	fatty acid oxidation	-3.7403	9.56633	6.22266	23250	98	124	5	4.03226	1.76655	2475|5465|5468|5562|10891	MTOR|PPARA|PPARG|PRKAA1|PPARGC1A	-2.88286
Input ID	Reactome Gene Sets	6	R-HSA-168138	Toll Like Receptor 9 (TLR9) Cascade	-3.7403	9.56633	6.22266	23250	98	124	5	4.03226	1.76655	177|351|1386|3146|7099	AGER|APP|ATF2|HMGB1|TLR4	-2.88286
Input ID	Reactome Gene Sets	6	R-HSA-168179	Toll Like Receptor TLR1:TLR2 Cascade	-3.7403	9.56633	6.22266	23250	98	124	5	4.03226	1.76655	177|351|1386|3146|7099	AGER|APP|ATF2|HMGB1|TLR4	-2.88286
Input ID	GO Biological Processes	19	GO:0008593	regulation of Notch signaling pathway	-3.7403	9.56633	6.22266	23250	98	124	5	4.03226	1.76655	1950|1956|4851|7471|28514	EGF|EGFR|NOTCH1|WNT1|DLL1	-2.88286
Input ID	Reactome Gene Sets	6	R-HSA-181438	Toll Like Receptor 2 (TLR2) Cascade	-3.7403	9.56633	6.22266	23250	98	124	5	4.03226	1.76655	177|351|1386|3146|7099	AGER|APP|ATF2|HMGB1|TLR4	-2.88286
Input ID	GO Biological Processes	19	GO:0032373	positive regulation of sterol transport	-3.73619	26.7857	8.65638	23250	21	124	3	2.41935	1.37981	348|4035|23411	APOE|LRP1|SIRT1	-2.88027
Input ID	GO Biological Processes	19	GO:0032376	positive regulation of cholesterol transport	-3.73619	26.7857	8.65638	23250	21	124	3	2.41935	1.37981	348|4035|23411	APOE|LRP1|SIRT1	-2.88027
Input ID	Canonical Pathways	11	M184	PID ECADHERIN KERATINOCYTE PATHWAY	-3.73619	26.7857	8.65638	23250	21	124	3	2.41935	1.37981	846|1499|1956	CASR|CTNNB1|EGFR	-2.88027
Input ID	GO Biological Processes	19	GO:1904886	beta-catenin destruction complex disassembly	-3.73619	26.7857	8.65638	23250	21	124	3	2.41935	1.37981	1499|2932|7471	CTNNB1|GSK3B|WNT1	-2.88027
Input ID	GO Biological Processes	19	GO:1903579	negative regulation of ATP metabolic process	-3.73619	26.7857	8.65638	23250	21	124	3	2.41935	1.37981	5465|6622|10891	PPARA|SNCA|PPARGC1A	-2.88027
Input ID	Reactome Gene Sets	6	R-HSA-5654688	SHC-mediated cascade:FGFR1	-3.73619	26.7857	8.65638	23250	21	124	3	2.41935	1.37981	3845|6654|9365	KRAS|SOS1|KL	-2.88027
Input ID	GO Biological Processes	19	GO:0030539	male genitalia development	-3.73619	26.7857	8.65638	23250	21	124	3	2.41935	1.37981	1499|1718|7490	CTNNB1|DHCR24|WT1	-2.88027
Input ID	GO Biological Processes	19	GO:0002544	chronic inflammatory response	-3.73619	26.7857	8.65638	23250	21	124	3	2.41935	1.37981	3553|6279|7124	IL1B|S100A8|TNF	-2.88027
Input ID	GO Biological Processes	19	GO:0042094	interleukin-2 biosynthetic process	-3.73619	26.7857	8.65638	23250	21	124	3	2.41935	1.37981	3552|3553|5074	IL1A|IL1B|PAWR	-2.88027
Input ID	Reactome Gene Sets	6	R-HSA-2428924	IGF1R signaling cascade	-3.73427	14.1509	7.01846	23250	53	124	4	3.22581	1.58668	3480|3845|6654|9365	IGF1R|KRAS|SOS1|KL	-2.87926
Input ID	GO Biological Processes	19	GO:0048168	regulation of neuronal synaptic plasticity	-3.73427	14.1509	7.01846	23250	53	124	4	3.22581	1.58668	348|351|3845|6622	APOE|APP|KRAS|SNCA	-2.87926
Input ID	GO Biological Processes	19	GO:0046626	regulation of insulin receptor signaling pathway	-3.73427	14.1509	7.01846	23250	53	124	4	3.22581	1.58668	2931|3553|3630|23411	GSK3A|IL1B|INS|SIRT1	-2.87926
Input ID	GO Biological Processes	19	GO:0045806	negative regulation of endocytosis	-3.73427	14.1509	7.01846	23250	53	124	4	3.22581	1.58668	341|351|3146|5663	APOC1|APP|HMGB1|PSEN1	-2.87926
Input ID	GO Biological Processes	19	GO:0071320	cellular response to cAMP	-3.73427	14.1509	7.01846	23250	53	124	4	3.22581	1.58668	328|351|5294|7490	APEX1|APP|PIK3CG|WT1	-2.87926
Input ID	GO Biological Processes	19	GO:0002819	regulation of adaptive immune response	-3.72991	7.25806	5.72413	23250	155	124	6	4.83871	1.92701	177|3146|3553|3569|7124|23411	AGER|HMGB1|IL1B|IL6|TNF|SIRT1	-2.87536
Input ID	Reactome Gene Sets	6	R-HSA-4420097	VEGFA-VEGFR2 Pathway	-3.71963	9.4697	6.18391	23250	99	124	5	4.03226	1.76655	1499|2475|3320|3845|5566	CTNNB1|MTOR|HSP90AA1|KRAS|PRKACA	-2.86705
Input ID	Reactome Gene Sets	6	R-HSA-168164	Toll Like Receptor 3 (TLR3) Cascade	-3.71963	9.4697	6.18391	23250	99	124	5	4.03226	1.76655	177|351|1386|3146|7099	AGER|APP|ATF2|HMGB1|TLR4	-2.86705
Input ID	KEGG Pathway	24	hsa05231	Choline metabolism in cancer	-3.71963	9.4697	6.18391	23250	99	124	5	4.03226	1.76655	1950|1956|2475|3845|6654	EGF|EGFR|MTOR|KRAS|SOS1	-2.86705
Input ID	Reactome Gene Sets	6	R-HSA-1852241	Organelle biogenesis and maintenance	-3.71458	5.06757	5.1572	23250	296	124	8	6.45161	2.20618	1386|3313|3320|5465|5566|10013|10891|23410	ATF2|HSPA9|HSP90AA1|PPARA|PRKACA|HDAC6|PPARGC1A|SIRT3	-2.86245
Input ID	Canonical Pathways	11	M113	PID NFAT 3PATHWAY	-3.70263	13.8889	6.94334	23250	54	124	4	3.22581	1.58668	1827|2932|5534|5566	RCAN1|GSK3B|PPP3R1|PRKACA	-2.85336
Input ID	KEGG Pathway	24	hsa04923	Regulation of lipolysis in adipocytes	-3.70263	13.8889	6.94334	23250	54	124	4	3.22581	1.58668	3630|3643|5566|5743	INS|INSR|PRKACA|PTGS2	-2.85336
Input ID	GO Biological Processes	19	GO:0051438	regulation of ubiquitin-protein transferase activity	-3.70263	13.8889	6.94334	23250	54	124	4	3.22581	1.58668	5300|5663|10273|11315	PIN1|PSEN1|STUB1|PARK7	-2.85336
Input ID	Reactome Gene Sets	6	R-HSA-2404192	Signaling by Type 1 Insulin-like Growth Factor 1 Receptor (IGF1R)	-3.70263	13.8889	6.94334	23250	54	124	4	3.22581	1.58668	3480|3845|6654|9365	IGF1R|KRAS|SOS1|KL	-2.85336
Input ID	GO Biological Processes	19	GO:0060688	regulation of morphogenesis of a branching structure	-3.70263	13.8889	6.94334	23250	54	124	4	3.22581	1.58668	1499|2099|3553|7124	CTNNB1|ESR1|IL1B|TNF	-2.85336
Input ID	GO Biological Processes	19	GO:0010332	response to gamma radiation	-3.70263	13.8889	6.94334	23250	54	124	4	3.22581	1.58668	1410|3553|5562|7157	CRYAB|IL1B|PRKAA1|TP53	-2.85336
Input ID	GO Biological Processes	19	GO:0048015	phosphatidylinositol-mediated signaling	-3.69971	7.16561	5.67607	23250	157	124	6	4.83871	1.92701	1956|3480|3630|5294|8678|23411	EGFR|IGF1R|INS|PIK3CG|BECN1|SIRT1	-2.85067
Input ID	Reactome Gene Sets	6	R-HSA-937061	TRIF(TICAM1)-mediated TLR4 signaling	-3.6992	9.375	6.14571	23250	100	124	5	4.03226	1.76655	177|351|1386|3146|7099	AGER|APP|ATF2|HMGB1|TLR4	-2.85067
Input ID	GO Biological Processes	19	GO:0006641	triglyceride metabolic process	-3.6992	9.375	6.14571	23250	100	124	5	4.03226	1.76655	338|341|348|5294|23411	APOB|APOC1|APOE|PIK3CG|SIRT1	-2.85067
Input ID	Reactome Gene Sets	6	R-HSA-166166	MyD88-independent TLR4 cascade	-3.6992	9.375	6.14571	23250	100	124	5	4.03226	1.76655	177|351|1386|3146|7099	AGER|APP|ATF2|HMGB1|TLR4	-2.85067
Input ID	GO Biological Processes	19	GO:0034440	lipid oxidation	-3.6992	9.375	6.14571	23250	100	124	5	4.03226	1.76655	2475|5465|5468|5562|10891	MTOR|PPARA|PPARG|PRKAA1|PPARGC1A	-2.85067
Input ID	GO Biological Processes	19	GO:0022407	regulation of cell-cell adhesion	-3.69472	4.45251	4.9622	23250	379	124	9	7.25806	2.3299	177|3146|3553|3569|5074|5465|5621|7124|7471	AGER|HMGB1|IL1B|IL6|PAWR|PPARA|PRNP|TNF|WNT1	-2.84635
Input ID	GO Biological Processes	19	GO:0044770	cell cycle phase transition	-3.6939	3.69624	4.72065	23250	558	124	11	8.87097	2.55331	328|351|672|1029|1030|1956|3320|5243|5566|6868|7157	APEX1|APP|BRCA1|CDKN2A|CDKN2B|EGFR|HSP90AA1|ABCB1|PRKACA|ADAM17|TP53	-2.84567
Input ID	GO Biological Processes	19	GO:0048738	cardiac muscle tissue development	-3.67982	5.83333	5.33459	23250	225	124	7	5.64516	2.07257	2475|2931|4000|4851|5300|7490|28514	MTOR|GSK3A|LMNA|NOTCH1|PIN1|WT1|DLL1	-2.83264
Input ID	KEGG Pathway	24	hsa04916	Melanogenesis	-3.67899	9.28218	6.10804	23250	101	124	5	4.03226	1.76655	1499|2932|3845|5566|7471	CTNNB1|GSK3B|KRAS|PRKACA|WNT1	-2.83196
Input ID	GO Biological Processes	19	GO:0014706	striated muscle tissue development	-3.67779	4.42913	4.94181	23250	381	124	9	7.25806	2.3299	1499|2475|2931|4000|4851|5300|5562|7490|28514	CTNNB1|MTOR|GSK3A|LMNA|NOTCH1|PIN1|PRKAA1|WT1|DLL1	-2.8309
Input ID	GO Biological Processes	19	GO:0032469	endoplasmic reticulum calcium ion homeostasis	-3.67421	25.5682	8.44192	23250	22	124	3	2.41935	1.37981	351|488|5663	APP|ATP2A2|PSEN1	-2.82822
Input ID	GO Biological Processes	19	GO:0048261	negative regulation of receptor-mediated endocytosis	-3.67421	25.5682	8.44192	23250	22	124	3	2.41935	1.37981	341|351|5663	APOC1|APP|PSEN1	-2.82822
Input ID	GO Biological Processes	19	GO:0010818	T cell chemotaxis	-3.67421	25.5682	8.44192	23250	22	124	3	2.41935	1.37981	102|5294|6868	ADAM10|PIK3CG|ADAM17	-2.82822
Input ID	GO Biological Processes	19	GO:0071379	cellular response to prostaglandin stimulus	-3.67421	25.5682	8.44192	23250	22	124	3	2.41935	1.37981	338|5468|5562	APOB|PPARG|PRKAA1	-2.82822
Input ID	GO Biological Processes	19	GO:0070841	inclusion body assembly	-3.67421	25.5682	8.44192	23250	22	124	3	2.41935	1.37981	4137|5071|10013	MAPT|PRKN|HDAC6	-2.82822
Input ID	GO Biological Processes	19	GO:1905208	negative regulation of cardiocyte differentiation	-3.67421	25.5682	8.44192	23250	22	124	3	2.41935	1.37981	1956|2931|28514	EGFR|GSK3A|DLL1	-2.82822
Input ID	GO Biological Processes	19	GO:0070498	interleukin-1-mediated signaling pathway	-3.67162	13.6364	6.87019	23250	55	124	4	3.22581	1.58668	3552|3553|3569|8878	IL1A|IL1B|IL6|SQSTM1	-2.827
Input ID	GO Biological Processes	19	GO:0090181	regulation of cholesterol metabolic process	-3.67162	13.6364	6.87019	23250	55	124	4	3.22581	1.58668	338|348|5562|6647	APOB|APOE|PRKAA1|SOD1	-2.827
Input ID	GO Biological Processes	19	GO:0014888	striated muscle adaptation	-3.67162	13.6364	6.87019	23250	55	124	4	3.22581	1.58668	488|2475|4000|10891	ATP2A2|MTOR|LMNA|PPARGC1A	-2.827
Input ID	KEGG Pathway	24	hsa05134	Legionellosis	-3.67162	13.6364	6.87019	23250	55	124	4	3.22581	1.58668	3553|3569|7099|7124	IL1B|IL6|TLR4|TNF	-2.827
Input ID	GO Biological Processes	19	GO:0002066	columnar/cuboidal epithelial cell development	-3.67162	13.6364	6.87019	23250	55	124	4	3.22581	1.58668	2931|2932|6647|28514	GSK3A|GSK3B|SOD1|DLL1	-2.827
Input ID	KEGG Pathway	24	hsa05217	Basal cell carcinoma	-3.67162	13.6364	6.87019	23250	55	124	4	3.22581	1.58668	1499|2932|7157|7471	CTNNB1|GSK3B|TP53|WNT1	-2.827
Input ID	GO Biological Processes	19	GO:0002011	morphogenesis of an epithelial sheet	-3.67162	13.6364	6.87019	23250	55	124	4	3.22581	1.58668	2475|4851|6654|6868	MTOR|NOTCH1|SOS1|ADAM17	-2.827
Input ID	GO Biological Processes	19	GO:0006733	oxidoreduction coenzyme metabolic process	-3.66994	7.07547	5.62885	23250	159	124	6	4.83871	1.92701	3630|3643|5465|5562|5743|10891	INS|INSR|PPARA|PRKAA1|PTGS2|PPARGC1A	-2.82603
Input ID	GO Biological Processes	19	GO:0051302	regulation of cell division	-3.66994	7.07547	5.62885	23250	159	124	6	4.83871	1.92701	3552|3553|5300|8678|10519|28514	IL1A|IL1B|PIN1|BECN1|CIB1|DLL1	-2.82603
Input ID	GO Biological Processes	19	GO:0032963	collagen metabolic process	-3.659	9.19118	6.07089	23250	102	124	5	4.03226	1.76655	3569|4313|4314|5468|5653	IL6|MMP2|MMP3|PPARG|KLK6	-2.81597
Input ID	GO Biological Processes	19	GO:0006626	protein targeting to mitochondrion	-3.659	9.19118	6.07089	23250	102	124	5	4.03226	1.76655	2931|3320|5071|5562|9531	GSK3A|HSP90AA1|PRKN|PRKAA1|BAG3	-2.81597
Input ID	GO Biological Processes	19	GO:0070588	calcium ion transmembrane transport	-3.65554	4.96689	5.08094	23250	302	124	8	6.45161	2.20618	274|488|1234|5294|5566|5621|5663|6622	BIN1|ATP2A2|CCR5|PIK3CG|PRKACA|PRNP|PSEN1|SNCA	-2.81266
Input ID	GO Biological Processes	19	GO:0048017	inositol lipid-mediated signaling	-3.65522	7.03125	5.60555	23250	160	124	6	4.83871	1.92701	1956|3480|3630|5294|8678|23411	EGFR|IGF1R|INS|PIK3CG|BECN1|SIRT1	-2.81264
Input ID	Reactome Gene Sets	6	R-HSA-5633007	Regulation of TP53 Activity	-3.65522	7.03125	5.60555	23250	160	124	6	4.83871	1.92701	672|1029|2475|5300|5562|7157	BRCA1|CDKN2A|MTOR|PIN1|PRKAA1|TP53	-2.81264
Input ID	Reactome Gene Sets	6	R-HSA-2151201	Transcriptional activation of mitochondrial biogenesis	-3.64122	13.3929	6.79893	23250	56	124	4	3.22581	1.58668	1386|5465|10891|23410	ATF2|PPARA|PPARGC1A|SIRT3	-2.79967
Input ID	GO Biological Processes	19	GO:0090303	positive regulation of wound healing	-3.64122	13.3929	6.79893	23250	56	124	4	3.22581	1.58668	2475|3146|6280|7099	MTOR|HMGB1|S100A9|TLR4	-2.79967
Input ID	GO Biological Processes	19	GO:0001836	release of cytochrome c from mitochondria	-3.64122	13.3929	6.79893	23250	56	124	4	3.22581	1.58668	2537|4000|5071|7157	IFI6|LMNA|PRKN|TP53	-2.79967
Input ID	KEGG Pathway	24	hsa04660	T cell receptor signaling pathway	-3.63923	9.10194	6.03425	23250	103	124	5	4.03226	1.76655	2932|3845|5534|6654|7124	GSK3B|KRAS|PPP3R1|SOS1|TNF	-2.79856
Input ID	GO Biological Processes	19	GO:0008630	intrinsic apoptotic signaling pathway in response to DNA damage	-3.63923	9.10194	6.03425	23250	103	124	5	4.03226	1.76655	672|7124|7157|23411|57805	BRCA1|TNF|TP53|SIRT1|CCAR2	-2.79856
Input ID	GO Biological Processes	19	GO:0002688	regulation of leukocyte chemotaxis	-3.63923	9.10194	6.03425	23250	103	124	5	4.03226	1.76655	102|3146|3553|3569|6868	ADAM10|HMGB1|IL1B|IL6|ADAM17	-2.79856
Input ID	GO Biological Processes	19	GO:0032091	negative regulation of protein binding	-3.63923	9.10194	6.03425	23250	103	124	5	4.03226	1.76655	2932|5300|5465|10273|11315	GSK3B|PIN1|PPARA|STUB1|PARK7	-2.79856
Input ID	GO Biological Processes	19	GO:0022037	metencephalon development	-3.63923	9.10194	6.03425	23250	103	124	5	4.03226	1.76655	5802|7471|7515|10891|28514	PTPRS|WNT1|XRCC1|PPARGC1A|DLL1	-2.79856
Input ID	GO Biological Processes	19	GO:1901800	positive regulation of proteasomal protein catabolic process	-3.63923	9.10194	6.03425	23250	103	124	5	4.03226	1.76655	2931|2932|5071|5663|10273	GSK3A|GSK3B|PRKN|PSEN1|STUB1	-2.79856
Input ID	GO Biological Processes	19	GO:0043161	proteasome-mediated ubiquitin-dependent protein catabolic process	-3.62764	4.36047	4.88147	23250	387	124	9	7.25806	2.3299	2931|2932|5071|5663|7345|10273|11315|23411|57805	GSK3A|GSK3B|PRKN|PSEN1|UCHL1|STUB1|PARK7|SIRT1|CCAR2	-2.78741
Input ID	GO Biological Processes	19	GO:0060968	regulation of gene silencing	-3.61967	9.01442	5.9981	23250	104	124	5	4.03226	1.76655	1956|2099|5468|6895|23411	EGFR|ESR1|PPARG|TARBP2|SIRT1	-2.78018
Input ID	GO Biological Processes	19	GO:0021761	limbic system development	-3.61967	9.01442	5.9981	23250	104	124	5	4.03226	1.76655	2932|5037|5802|7515|9638	GSK3B|PEBP1|PTPRS|XRCC1|FEZ1	-2.78018
Input ID	GO Biological Processes	19	GO:0032609	interferon-gamma production	-3.61967	9.01442	5.9981	23250	104	124	5	4.03226	1.76655	3146|3553|5621|7099|7124	HMGB1|IL1B|PRNP|TLR4|TNF	-2.78018
Input ID	GO Biological Processes	19	GO:0060419	heart growth	-3.61967	9.01442	5.9981	23250	104	124	5	4.03226	1.76655	2475|2931|4851|5300|7490	MTOR|GSK3A|NOTCH1|PIN1|WT1	-2.78018
Input ID	GO Biological Processes	19	GO:0090140	regulation of mitochondrial fission	-3.61521	24.4565	8.24126	23250	23	124	3	2.41935	1.37981	4137|5071|10891	MAPT|PRKN|PPARGC1A	-2.77805
Input ID	GO Biological Processes	19	GO:1900543	negative regulation of purine nucleotide metabolic process	-3.61521	24.4565	8.24126	23250	23	124	3	2.41935	1.37981	5465|6622|10891	PPARA|SNCA|PPARGC1A	-2.77805
Input ID	GO Biological Processes	19	GO:0043457	regulation of cellular respiration	-3.61521	24.4565	8.24126	23250	23	124	3	2.41935	1.37981	6622|10891|11315	SNCA|PPARGC1A|PARK7	-2.77805
Input ID	Reactome Gene Sets	6	R-HSA-8862803	Deregulated CDK5 triggers multiple neurodegenerative pathways in Alzheimer's disease models	-3.61521	24.4565	8.24126	23250	23	124	3	2.41935	1.37981	351|823|4000	APP|CAPN1|LMNA	-2.77805
Input ID	Reactome Gene Sets	6	R-HSA-8863678	Neurodegenerative Diseases	-3.61521	24.4565	8.24126	23250	23	124	3	2.41935	1.37981	351|823|4000	APP|CAPN1|LMNA	-2.77805
Input ID	Reactome Gene Sets	6	R-HSA-5654693	FRS-mediated FGFR1 signaling	-3.61521	24.4565	8.24126	23250	23	124	3	2.41935	1.37981	3845|6654|9365	KRAS|SOS1|KL	-2.77805
Input ID	GO Biological Processes	19	GO:0051654	establishment of mitochondrion localization	-3.61521	24.4565	8.24126	23250	23	124	3	2.41935	1.37981	4137|7345|9638	MAPT|UCHL1|FEZ1	-2.77805
Input ID	GO Biological Processes	19	GO:0002407	dendritic cell chemotaxis	-3.61521	24.4565	8.24126	23250	23	124	3	2.41935	1.37981	1234|3146|5294	CCR5|HMGB1|PIK3CG	-2.77805
Input ID	GO Biological Processes	19	GO:0051100	negative regulation of binding	-3.61168	6.90184	5.53682	23250	163	124	6	4.83871	1.92701	2932|5300|5465|5663|10273|11315	GSK3B|PIN1|PPARA|PSEN1|STUB1|PARK7	-2.77581
Input ID	GO Biological Processes	19	GO:0060759	regulation of response to cytokine stimulus	-3.61168	6.90184	5.53682	23250	163	124	6	4.83871	1.92701	3569|5071|5468|6868|7099|7124	IL6|PRKN|PPARG|ADAM17|TLR4|TNF	-2.77581
Input ID	GO Biological Processes	19	GO:0032370	positive regulation of lipid transport	-3.61141	13.1579	6.72946	23250	57	124	4	3.22581	1.58668	348|3553|4035|23411	APOE|IL1B|LRP1|SIRT1	-2.77581
Input ID	Canonical Pathways	11	M99	PID TXA2PATHWAY	-3.61141	13.1579	6.72946	23250	57	124	4	3.22581	1.58668	1950|1956|5294|5566	EGF|EGFR|PIK3CG|PRKACA	-2.77581
Input ID	GO Biological Processes	19	GO:1902110	positive regulation of mitochondrial membrane permeability involved in apoptotic process	-3.61141	13.1579	6.72946	23250	57	124	4	3.22581	1.58668	1386|2931|2932|7157	ATF2|GSK3A|GSK3B|TP53	-2.77581
Input ID	GO Biological Processes	19	GO:0042108	positive regulation of cytokine biosynthetic process	-3.61141	13.1579	6.72946	23250	57	124	4	3.22581	1.58668	3552|3553|7099|7124	IL1A|IL1B|TLR4|TNF	-2.77581
Input ID	GO Biological Processes	19	GO:0046777	protein autophosphorylation	-3.59874	5.65733	5.22047	23250	232	124	7	5.64516	2.07257	1956|2475|2932|3480|3630|3643|5566	EGFR|MTOR|GSK3B|IGF1R|INS|INSR|PRKACA	-2.76448
Input ID	GO Biological Processes	19	GO:0030178	negative regulation of Wnt signaling pathway	-3.58315	6.81818	5.49196	23250	165	124	6	4.83871	1.92701	348|2931|2932|4035|4851|5071	APOE|GSK3A|GSK3B|LRP1|NOTCH1|PRKN	-2.74977
Input ID	GO Biological Processes	19	GO:0048469	cell maturation	-3.56904	6.77711	5.4698	23250	166	124	6	4.83871	1.92701	351|1499|2475|5037|5468|5566	APP|CTNNB1|MTOR|PEBP1|PPARG|PRKACA	-2.73652
Input ID	GO Biological Processes	19	GO:0002065	columnar/cuboidal epithelial cell differentiation	-3.56223	8.76168	5.89251	23250	107	124	5	4.03226	1.76655	2931|2932|4851|6647|28514	GSK3A|GSK3B|NOTCH1|SOD1|DLL1	-2.7313
Input ID	GO Biological Processes	19	GO:0043244	regulation of protein complex disassembly	-3.56223	8.76168	5.89251	23250	107	124	5	4.03226	1.76655	3480|3643|7124|10013|10519	IGF1R|INSR|TNF|HDAC6|CIB1	-2.7313
Input ID	KEGG Pathway	24	hsa04659	Th17 cell differentiation	-3.56223	8.76168	5.89251	23250	107	124	5	4.03226	1.76655	2475|3320|3553|3569|5534	MTOR|HSP90AA1|IL1B|IL6|PPP3R1	-2.7313
Input ID	Reactome Gene Sets	6	R-HSA-194138	Signaling by VEGF	-3.56223	8.76168	5.89251	23250	107	124	5	4.03226	1.76655	1499|2475|3320|3845|5566	CTNNB1|MTOR|HSP90AA1|KRAS|PRKACA	-2.7313
Input ID	GO Biological Processes	19	GO:0031398	positive regulation of protein ubiquitination	-3.56223	8.76168	5.89251	23250	107	124	5	4.03226	1.76655	672|2931|5071|5300|10273	BRCA1|GSK3A|PRKN|PIN1|STUB1	-2.7313
Input ID	GO Biological Processes	19	GO:0045980	negative regulation of nucleotide metabolic process	-3.55891	23.4375	8.05296	23250	24	124	3	2.41935	1.37981	5465|6622|10891	PPARA|SNCA|PPARGC1A	-2.72898
Input ID	Reactome Gene Sets	6	R-HSA-3371571	HSF1-dependent transactivation	-3.55891	23.4375	8.05296	23250	24	124	3	2.41935	1.37981	1410|2475|3320	CRYAB|MTOR|HSP90AA1	-2.72898
Input ID	GO Biological Processes	19	GO:0002068	glandular epithelial cell development	-3.55891	23.4375	8.05296	23250	24	124	3	2.41935	1.37981	2931|2932|28514	GSK3A|GSK3B|DLL1	-2.72898
Input ID	Reactome Gene Sets	6	R-HSA-933542	TRAF6 mediated NF-kB activation	-3.55891	23.4375	8.05296	23250	24	124	3	2.41935	1.37981	177|351|3146	AGER|APP|HMGB1	-2.72898
Input ID	GO Biological Processes	19	GO:0043032	positive regulation of macrophage activation	-3.55891	23.4375	8.05296	23250	24	124	3	2.41935	1.37981	177|351|7099	AGER|APP|TLR4	-2.72898
Input ID	GO Biological Processes	19	GO:0003309	type B pancreatic cell differentiation	-3.55891	23.4375	8.05296	23250	24	124	3	2.41935	1.37981	2931|2932|28514	GSK3A|GSK3B|DLL1	-2.72898
Input ID	Reactome Gene Sets	6	R-HSA-418594	G alpha (i) signalling events	-3.5542	4.26136	4.79323	23250	396	124	9	7.25806	2.3299	151|338|348|351|846|1234|4035|5534|5566	ADRA2B|APOB|APOE|APP|CASR|CCR5|LRP1|PPP3R1|PRKACA	-2.72456
Input ID	GO Biological Processes	19	GO:0060135	maternal process involved in female pregnancy	-3.55345	12.7119	6.59561	23250	59	124	4	3.22581	1.58668	682|2099|2475|5743	BSG|ESR1|MTOR|PTGS2	-2.72424
Input ID	Canonical Pathways	11	M261	PID P53 REGULATION PATHWAY	-3.55345	12.7119	6.59561	23250	59	124	4	3.22581	1.58668	1029|2932|5300|7157	CDKN2A|GSK3B|PIN1|TP53	-2.72424
Input ID	GO Biological Processes	19	GO:1902686	mitochondrial outer membrane permeabilization involved in programmed cell death	-3.55345	12.7119	6.59561	23250	59	124	4	3.22581	1.58668	1386|2931|2932|7157	ATF2|GSK3A|GSK3B|TP53	-2.72424
Input ID	Reactome Gene Sets	6	R-HSA-8957275	Post-translational protein phosphorylation	-3.54348	8.68056	5.85823	23250	108	124	5	4.03226	1.76655	102|338|348|351|3569	ADAM10|APOB|APOE|APP|IL6	-2.71513
Input ID	Canonical Pathways	11	M3468	NABA ECM REGULATORS	-3.5315	5.51471	5.12629	23250	238	124	7	5.64516	2.07257	102|1510|4313|4314|5654|6868|8038	ADAM10|CTSE|MMP2|MMP3|HTRA1|ADAM17|ADAM12	-2.70386
Input ID	KEGG Pathway	24	hsa05210	Colorectal cancer	-3.52527	12.5	6.53109	23250	60	124	4	3.22581	1.58668	1499|2932|3845|7157	CTNNB1|GSK3B|KRAS|TP53	-2.69834
Input ID	GO Biological Processes	19	GO:0099175	regulation of postsynapse organization	-3.52527	12.5	6.53109	23250	60	124	4	3.22581	1.58668	348|3630|5621|80823	APOE|INS|PRNP|BHLHB9	-2.69834
Input ID	GO Biological Processes	19	GO:0046503	glycerolipid catabolic process	-3.52527	12.5	6.53109	23250	60	124	4	3.22581	1.58668	338|341|348|5294	APOB|APOC1|APOE|PIK3CG	-2.69834
Input ID	KEGG Pathway	24	hsa04621	NOD-like receptor signaling pathway	-3.51355	6.61765	5.38299	23250	170	124	6	4.83871	1.92701	846|3320|3553|3569|7099|7124	CASR|HSP90AA1|IL1B|IL6|TLR4|TNF	-2.68719
Input ID	GO Biological Processes	19	GO:0072009	nephron epithelium development	-3.50657	8.52273	5.79099	23250	110	124	5	4.03226	1.76655	1499|4851|7471|7490|28514	CTNNB1|NOTCH1|WNT1|WT1|DLL1	-2.68195
Input ID	GO Biological Processes	19	GO:0046660	female sex differentiation	-3.50657	8.52273	5.79099	23250	110	124	5	4.03226	1.76655	2099|3643|6647|7490|23411	ESR1|INSR|SOD1|WT1|SIRT1	-2.68195
Input ID	GO Biological Processes	19	GO:0046854	phosphatidylinositol phosphorylation	-3.50657	8.52273	5.79099	23250	110	124	5	4.03226	1.76655	1950|1956|2099|5294|9365	EGF|EGFR|ESR1|PIK3CG|KL	-2.68195
Input ID	GO Biological Processes	19	GO:0032479	regulation of type I interferon production	-3.50657	8.52273	5.79099	23250	110	124	5	4.03226	1.76655	1499|3146|5300|5802|7099	CTNNB1|HMGB1|PIN1|PTPRS|TLR4	-2.68195
Input ID	GO Biological Processes	19	GO:0043501	skeletal muscle adaptation	-3.50508	22.5	7.87578	23250	25	124	3	2.41935	1.37981	488|2475|10891	ATP2A2|MTOR|PPARGC1A	-2.68195
Input ID	GO Biological Processes	19	GO:0046885	regulation of hormone biosynthetic process	-3.50508	22.5	7.87578	23250	25	124	3	2.41935	1.37981	3553|7124|10891	IL1B|TNF|PPARGC1A	-2.68195
Input ID	GO Biological Processes	19	GO:0033081	regulation of T cell differentiation in thymus	-3.50508	22.5	7.87578	23250	25	124	3	2.41935	1.37981	3553|6647|6654	IL1B|SOD1|SOS1	-2.68195
Input ID	GO Biological Processes	19	GO:0019430	removal of superoxide radicals	-3.50508	22.5	7.87578	23250	25	124	3	2.41935	1.37981	6647|7124|11315	SOD1|TNF|PARK7	-2.68195
Input ID	GO Biological Processes	19	GO:0071280	cellular response to copper ion	-3.50508	22.5	7.87578	23250	25	124	3	2.41935	1.37981	5621|6622|8678	PRNP|SNCA|BECN1	-2.68195
Input ID	GO Biological Processes	19	GO:0030728	ovulation	-3.50508	22.5	7.87578	23250	25	124	3	2.41935	1.37981	3553|5743|23411	IL1B|PTGS2|SIRT1	-2.68195
Input ID	GO Biological Processes	19	GO:0007263	nitric oxide mediated signal transduction	-3.50508	22.5	7.87578	23250	25	124	3	2.41935	1.37981	348|1956|3630	APOE|EGFR|INS	-2.68195
Input ID	Reactome Gene Sets	6	R-HSA-5674400	Constitutive Signaling by AKT1 E17K in Cancer	-3.50508	22.5	7.87578	23250	25	124	3	2.41935	1.37981	2475|2931|2932	MTOR|GSK3A|GSK3B	-2.68195
Input ID	Canonical Pathways	11	M139	PID MYC PATHWAY	-3.50508	22.5	7.87578	23250	25	124	3	2.41935	1.37981	1029|2932|5300	CDKN2A|GSK3B|PIN1	-2.68195
Input ID	GO Biological Processes	19	GO:0050707	regulation of cytokine secretion	-3.49992	6.57895	5.36173	23250	171	124	6	4.83871	1.92701	3146|3552|3553|3630|7099|7124	HMGB1|IL1A|IL1B|INS|TLR4|TNF	-2.67709
Input ID	GO Biological Processes	19	GO:0046034	ATP metabolic process	-3.49863	5.44606	5.0804	23250	241	124	7	5.64516	2.07257	3630|3643|5465|5562|6622|10891|11315	INS|INSR|PPARA|PRKAA1|SNCA|PPARGC1A|PARK7	-2.67595
Input ID	GO Biological Processes	19	GO:0009880	embryonic pattern specification	-3.4976	12.2951	6.46809	23250	61	124	4	3.22581	1.58668	1499|7471|7490|28514	CTNNB1|WNT1|WT1|DLL1	-2.6759
Input ID	Reactome Gene Sets	6	R-HSA-8943724	Regulation of PTEN gene transcription	-3.4976	12.2951	6.46809	23250	61	124	4	3.22581	1.58668	1386|2475|5468|7157	ATF2|MTOR|PPARG|TP53	-2.6759
Input ID	GO Biological Processes	19	GO:0046888	negative regulation of hormone secretion	-3.4976	12.2951	6.46809	23250	61	124	4	3.22581	1.58668	151|3553|5071|7351	ADRA2B|IL1B|PRKN|UCP2	-2.6759
Input ID	GO Biological Processes	19	GO:0032623	interleukin-2 production	-3.4976	12.2951	6.46809	23250	61	124	4	3.22581	1.58668	3552|3553|5074|5621	IL1A|IL1B|PAWR|PRNP	-2.6759
Input ID	Canonical Pathways	11	M58	PID AR PATHWAY	-3.4976	12.2951	6.46809	23250	61	124	4	3.22581	1.58668	672|1029|1499|5074	BRCA1|CDKN2A|CTNNB1|PAWR	-2.6759
Input ID	GO Biological Processes	19	GO:0001885	endothelial cell development	-3.4976	12.2951	6.46809	23250	61	124	4	3.22581	1.58668	1499|3553|5802|7124	CTNNB1|IL1B|PTPRS|TNF	-2.6759
Input ID	GO Biological Processes	19	GO:0035794	positive regulation of mitochondrial membrane permeability	-3.4976	12.2951	6.46809	23250	61	124	4	3.22581	1.58668	1386|2931|2932|7157	ATF2|GSK3A|GSK3B|TP53	-2.6759
Input ID	GO Biological Processes	19	GO:0032606	type I interferon production	-3.48839	8.44595	5.758	23250	111	124	5	4.03226	1.76655	1499|3146|5300|5802|7099	CTNNB1|HMGB1|PIN1|PTPRS|TLR4	-2.66768
Input ID	GO Biological Processes	19	GO:0042552	myelination	-3.48839	8.44595	5.758	23250	111	124	5	4.03226	1.76655	1499|2475|5534|5653|6647	CTNNB1|MTOR|PPP3R1|KLK6|SOD1	-2.66768
Input ID	GO Biological Processes	19	GO:0048489	synaptic vesicle transport	-3.48839	8.44595	5.758	23250	111	124	5	4.03226	1.76655	488|1499|5071|5663|6622	ATP2A2|CTNNB1|PRKN|PSEN1|SNCA	-2.66768
Input ID	GO Biological Processes	19	GO:0097480	establishment of synaptic vesicle localization	-3.48839	8.44595	5.758	23250	111	124	5	4.03226	1.76655	488|1499|5071|5663|6622	ATP2A2|CTNNB1|PRKN|PSEN1|SNCA	-2.66768
Input ID	GO Biological Processes	19	GO:2000146	negative regulation of cell motility	-3.47754	4.6729	4.85212	23250	321	124	8	6.45161	2.20618	328|348|3146|4035|4851|5300|5468|10891	APEX1|APOE|HMGB1|LRP1|NOTCH1|PIN1|PPARG|PPARGC1A	-2.65795
Input ID	GO Biological Processes	19	GO:0006820	anion transport	-3.47485	3.48395	4.48287	23250	592	124	11	8.87097	2.55331	341|348|682|2475|3553|5243|5465|5468|5621|5663|6622	APOC1|APOE|BSG|MTOR|IL1B|ABCB1|PPARA|PPARG|PRNP|PSEN1|SNCA	-2.65582
Input ID	GO Biological Processes	19	GO:2000045	regulation of G1/S transition of mitotic cell cycle	-3.47291	6.50289	5.3197	23250	173	124	6	4.83871	1.92701	328|1029|1030|1956|6868|7157	APEX1|CDKN2A|CDKN2B|EGFR|ADAM17|TP53	-2.65402
Input ID	GO Biological Processes	19	GO:0016239	positive regulation of macroautophagy	-3.47042	12.0968	6.40654	23250	62	124	4	3.22581	1.58668	5071|8678|10013|23411	PRKN|BECN1|HDAC6|SIRT1	-2.65206
Input ID	GO Biological Processes	19	GO:0046622	positive regulation of organ growth	-3.47042	12.0968	6.40654	23250	62	124	4	3.22581	1.58668	2475|4851|5300|7490	MTOR|NOTCH1|PIN1|WT1	-2.65206
Input ID	GO Biological Processes	19	GO:0006754	ATP biosynthetic process	-3.47039	8.37054	5.72543	23250	112	124	5	4.03226	1.76655	3630|3643|5465|5562|10891	INS|INSR|PPARA|PRKAA1|PPARGC1A	-2.65206
Input ID	GO Biological Processes	19	GO:0046700	heterocycle catabolic process	-3.46866	3.47808	4.47614	23250	593	124	11	8.87097	2.55331	328|2475|2931|3146|3630|3643|3921|4968|5465|5562|10891	APEX1|MTOR|GSK3A|HMGB1|INS|INSR|RPSA|OGG1|PPARA|PRKAA1|PPARGC1A	-2.65047
Input ID	GO Biological Processes	19	GO:0032984	protein-containing complex disassembly	-3.46853	4.65839	4.84058	23250	322	124	8	6.45161	2.20618	1499|2932|3480|3643|7124|7471|10013|10519	CTNNB1|GSK3B|IGF1R|INSR|TNF|WNT1|HDAC6|CIB1	-2.65047
Input ID	GO Biological Processes	19	GO:0044270	cellular nitrogen compound catabolic process	-3.45632	3.46639	4.46273	23250	595	124	11	8.87097	2.55331	328|2475|2931|3146|3630|3643|3921|4968|5465|5562|10891	APEX1|MTOR|GSK3A|HMGB1|INS|INSR|RPSA|OGG1|PPARA|PRKAA1|PPARGC1A	-2.63924
Input ID	GO Biological Processes	19	GO:0043270	positive regulation of ion transport	-3.45555	5.35714	5.02038	23250	245	124	7	5.64516	2.07257	348|846|3553|5243|5663|6622|11315	APOE|CASR|IL1B|ABCB1|PSEN1|SNCA|PARK7	-2.63862
Input ID	GO Biological Processes	19	GO:0051569	regulation of histone H3-K4 methylation	-3.45352	21.6346	7.70863	23250	26	124	3	2.41935	1.37981	672|1499|1789	BRCA1|CTNNB1|DNMT3B	-2.63853
Input ID	Canonical Pathways	11	M36	PID IL27 PATHWAY	-3.45352	21.6346	7.70863	23250	26	124	3	2.41935	1.37981	3553|3569|7124	IL1B|IL6|TNF	-2.63853
Input ID	GO Biological Processes	19	GO:0048169	regulation of long-term neuronal synaptic plasticity	-3.45352	21.6346	7.70863	23250	26	124	3	2.41935	1.37981	351|3845|6622	APP|KRAS|SNCA	-2.63853
Input ID	GO Biological Processes	19	GO:0071514	genetic imprinting	-3.45352	21.6346	7.70863	23250	26	124	3	2.41935	1.37981	672|1788|2931	BRCA1|DNMT3A|GSK3A	-2.63853
Input ID	GO Biological Processes	19	GO:0045662	negative regulation of myoblast differentiation	-3.45352	21.6346	7.70863	23250	26	124	3	2.41935	1.37981	4851|7124|28514	NOTCH1|TNF|DLL1	-2.63853
Input ID	GO Biological Processes	19	GO:2000406	positive regulation of T cell migration	-3.45352	21.6346	7.70863	23250	26	124	3	2.41935	1.37981	102|351|6868	ADAM10|APP|ADAM17	-2.63853
Input ID	GO Biological Processes	19	GO:0048668	collateral sprouting	-3.45352	21.6346	7.70863	23250	26	124	3	2.41935	1.37981	351|5802|10013	APP|PTPRS|HDAC6	-2.63853
Input ID	GO Biological Processes	19	GO:0060765	regulation of androgen receptor signaling pathway	-3.45352	21.6346	7.70863	23250	26	124	3	2.41935	1.37981	10013|11315|23411	HDAC6|PARK7|SIRT1	-2.63853
Input ID	Canonical Pathways	11	M247	PID INSULIN GLUCOSE PATHWAY	-3.45352	21.6346	7.70863	23250	26	124	3	2.41935	1.37981	2932|3630|3643	GSK3B|INS|INSR	-2.63853
Input ID	GO Biological Processes	19	GO:0035883	enteroendocrine cell differentiation	-3.45352	21.6346	7.70863	23250	26	124	3	2.41935	1.37981	2931|2932|28514	GSK3A|GSK3B|DLL1	-2.63853
Input ID	Canonical Pathways	11	M162	PID RXR VDR PATHWAY	-3.45352	21.6346	7.70863	23250	26	124	3	2.41935	1.37981	5465|5468|7124	PPARA|PPARG|TNF	-2.63853
Input ID	GO Biological Processes	19	GO:0036336	dendritic cell migration	-3.45352	21.6346	7.70863	23250	26	124	3	2.41935	1.37981	1234|3146|5294	CCR5|HMGB1|PIK3CG	-2.63853
Input ID	GO Biological Processes	19	GO:0051953	negative regulation of amine transport	-3.45352	21.6346	7.70863	23250	26	124	3	2.41935	1.37981	151|3553|6622	ADRA2B|IL1B|SNCA	-2.63853
Input ID	GO Biological Processes	19	GO:1990266	neutrophil migration	-3.45258	8.29646	5.69325	23250	113	124	5	4.03226	1.76655	3552|3553|5294|6279|6280	IL1A|IL1B|PIK3CG|S100A8|S100A9	-2.63813
Input ID	GO Biological Processes	19	GO:0009132	nucleoside diphosphate metabolic process	-3.45258	8.29646	5.69325	23250	113	124	5	4.03226	1.76655	3630|3643|5465|5562|10891	INS|INSR|PPARA|PRKAA1|PPARGC1A	-2.63813
Input ID	GO Biological Processes	19	GO:0008366	axon ensheathment	-3.45258	8.29646	5.69325	23250	113	124	5	4.03226	1.76655	1499|2475|5534|5653|6647	CTNNB1|MTOR|PPP3R1|KLK6|SOD1	-2.63813
Input ID	GO Biological Processes	19	GO:0007272	ensheathment of neurons	-3.45258	8.29646	5.69325	23250	113	124	5	4.03226	1.76655	1499|2475|5534|5653|6647	CTNNB1|MTOR|PPP3R1|KLK6|SOD1	-2.63813
Input ID	GO Biological Processes	19	GO:0043588	skin development	-3.44402	4.11585	4.66105	23250	410	124	9	7.25806	2.3299	823|1499|1718|1956|4851|5663|6654|7124|28514	CAPN1|CTNNB1|DHCR24|EGFR|NOTCH1|PSEN1|SOS1|TNF|DLL1	-2.63092
Input ID	GO Biological Processes	19	GO:0034121	regulation of toll-like receptor signaling pathway	-3.44371	11.9048	6.34639	23250	63	124	4	3.22581	1.58668	2099|3146|5802|7099	ESR1|HMGB1|PTPRS|TLR4	-2.63092
Input ID	GO Biological Processes	19	GO:0046686	response to cadmium ion	-3.44371	11.9048	6.34639	23250	63	124	4	3.22581	1.58668	1956|4968|5621|6647	EGFR|OGG1|PRNP|SOD1	-2.63092
Input ID	GO Biological Processes	19	GO:1902108	regulation of mitochondrial membrane permeability involved in apoptotic process	-3.44371	11.9048	6.34639	23250	63	124	4	3.22581	1.58668	1386|2931|2932|7157	ATF2|GSK3A|GSK3B|TP53	-2.63092
Input ID	GO Biological Processes	19	GO:0032677	regulation of interleukin-8 production	-3.44371	11.9048	6.34639	23250	63	124	4	3.22581	1.58668	3553|7099|7124|11315	IL1B|TLR4|TNF|PARK7	-2.63092
Input ID	GO Biological Processes	19	GO:1905710	positive regulation of membrane permeability	-3.44371	11.9048	6.34639	23250	63	124	4	3.22581	1.58668	1386|2931|2932|7157	ATF2|GSK3A|GSK3B|TP53	-2.63092
Input ID	GO Biological Processes	19	GO:0006289	nucleotide-excision repair	-3.43494	8.22368	5.66148	23250	114	124	5	4.03226	1.76655	3146|4968|7157|7515|23411	HMGB1|OGG1|TP53|XRCC1|SIRT1	-2.6227
Input ID	GO Biological Processes	19	GO:0050803	regulation of synapse structure or activity	-3.43308	6.39205	5.25789	23250	176	124	6	4.83871	1.92701	348|351|3630|5621|6622|80823	APOE|APP|INS|PRNP|SNCA|BHLHB9	-2.62098
Input ID	GO Biological Processes	19	GO:0002263	cell activation involved in immune response	-3.43002	3.21429	4.35584	23250	700	124	12	9.67742	2.65502	102|351|823|3146|3320|3569|4035|5294|5663|6279|6280|28514	ADAM10|APP|CAPN1|HMGB1|HSP90AA1|IL6|LRP1|PIK3CG|PSEN1|S100A8|S100A9|DLL1	-2.61874
Input ID	GO Biological Processes	19	GO:0051153	regulation of striated muscle cell differentiation	-3.41747	8.15217	5.63009	23250	115	124	5	4.03226	1.76655	2475|2931|4851|5300|28514	MTOR|GSK3A|NOTCH1|PIN1|DLL1	-2.60756
Input ID	GO Biological Processes	19	GO:0048675	axon extension	-3.41747	8.15217	5.63009	23250	115	124	5	4.03226	1.76655	348|2932|3320|4137|5802	APOE|GSK3B|HSP90AA1|MAPT|PTPRS	-2.60756
Input ID	Reactome Gene Sets	6	R-HSA-1442490	Collagen degradation	-3.41746	11.7188	6.28759	23250	64	124	4	3.22581	1.58668	102|4313|4314|6868	ADAM10|MMP2|MMP3|ADAM17	-2.60756
Input ID	GO Biological Processes	19	GO:0042306	regulation of protein import into nucleus	-3.41746	11.7188	6.28759	23250	64	124	4	3.22581	1.58668	5663|5743|9531|23411	PSEN1|PTGS2|BAG3|SIRT1	-2.60756
Input ID	Canonical Pathways	11	M200	PID ERA GENOMIC PATHWAY	-3.41746	11.7188	6.28759	23250	64	124	4	3.22581	1.58668	672|2099|2100|6647	BRCA1|ESR1|ESR2|SOD1	-2.60756
Input ID	GO Biological Processes	19	GO:1903051	negative regulation of proteolysis involved in cellular protein catabolic process	-3.41746	11.7188	6.28759	23250	64	124	4	3.22581	1.58668	5663|7471|11315|57805	PSEN1|WNT1|PARK7|CCAR2	-2.60756
Input ID	GO Biological Processes	19	GO:2000243	positive regulation of reproductive process	-3.41746	11.7188	6.28759	23250	64	124	4	3.22581	1.58668	1499|3643|7490|10519	CTNNB1|INSR|WT1|CIB1	-2.60756
Input ID	GO Biological Processes	19	GO:0045670	regulation of osteoclast differentiation	-3.41746	11.7188	6.28759	23250	64	124	4	3.22581	1.58668	1499|2475|7099|7124	CTNNB1|MTOR|TLR4|TNF	-2.60756
Input ID	GO Biological Processes	19	GO:0050820	positive regulation of coagulation	-3.40406	20.8333	7.55059	23250	27	124	3	2.41935	1.37981	5663|6280|7099	PSEN1|S100A9|TLR4	-2.5958
Input ID	GO Biological Processes	19	GO:0032647	regulation of interferon-alpha production	-3.40406	20.8333	7.55059	23250	27	124	3	2.41935	1.37981	3146|5802|7099	HMGB1|PTPRS|TLR4	-2.5958
Input ID	GO Biological Processes	19	GO:0071451	cellular response to superoxide	-3.40406	20.8333	7.55059	23250	27	124	3	2.41935	1.37981	6647|7124|11315	SOD1|TNF|PARK7	-2.5958
Input ID	GO Biological Processes	19	GO:0071450	cellular response to oxygen radical	-3.40406	20.8333	7.55059	23250	27	124	3	2.41935	1.37981	6647|7124|11315	SOD1|TNF|PARK7	-2.5958
Input ID	Canonical Pathways	11	M1718	SIG IL4RECEPTOR IN B LYPHOCYTES	-3.40406	20.8333	7.55059	23250	27	124	3	2.41935	1.37981	2931|2932|6654	GSK3A|GSK3B|SOS1	-2.5958
Input ID	GO Biological Processes	19	GO:0007281	germ cell development	-3.40287	5.25	4.94718	23250	250	124	7	5.64516	2.07257	1499|2475|5037|5566|6895|7490|10519	CTNNB1|MTOR|PEBP1|PRKACA|TARBP2|WT1|CIB1	-2.59488
Input ID	GO Biological Processes	19	GO:0034404	nucleobase-containing small molecule biosynthetic process	-3.39403	6.28492	5.1975	23250	179	124	6	4.83871	1.92701	3630|3643|4968|5465|5562|10891	INS|INSR|OGG1|PPARA|PRKAA1|PPARGC1A	-2.58672
Input ID	Reactome Gene Sets	6	R-HSA-5684996	MAPK1/MAPK3 signaling	-3.39249	5.22908	4.93278	23250	251	124	7	5.64516	2.07257	1950|1956|3569|3845|5037|6654|9365	EGF|EGFR|IL6|KRAS|PEBP1|SOS1|KL	-2.58531
Input ID	GO Biological Processes	19	GO:0051937	catecholamine transport	-3.39166	11.5385	6.23007	23250	65	124	4	3.22581	1.58668	151|5071|6622|11315	ADRA2B|PRKN|SNCA|PARK7	-2.58503
Input ID	GO Biological Processes	19	GO:1903036	positive regulation of response to wounding	-3.39166	11.5385	6.23007	23250	65	124	4	3.22581	1.58668	2475|3146|6280|7099	MTOR|HMGB1|S100A9|TLR4	-2.58503
Input ID	GO Biological Processes	19	GO:1903672	positive regulation of sprouting angiogenesis	-3.39166	11.5385	6.23007	23250	65	124	4	3.22581	1.58668	3146|5743|10519|28514	HMGB1|PTGS2|CIB1|DLL1	-2.58503
Input ID	Canonical Pathways	11	M279	PID RB 1PATHWAY	-3.39166	11.5385	6.23007	23250	65	124	4	3.22581	1.58668	1029|1386|5468|23411	CDKN2A|ATF2|PPARG|SIRT1	-2.58503
Input ID	KEGG Pathway	24	hsa05202	Transcriptional misregulation in cancer	-3.38118	6.25	5.17767	23250	180	124	6	4.83871	1.92701	3480|3569|4314|5468|7157|7490	IGF1R|IL6|MMP3|PPARG|TP53|WT1	-2.57591
Input ID	GO Biological Processes	19	GO:0031060	regulation of histone methylation	-3.36629	11.3636	6.1738	23250	66	124	4	3.22581	1.58668	672|1499|1789|23411	BRCA1|CTNNB1|DNMT3B|SIRT1	-2.5621
Input ID	GO Biological Processes	19	GO:0010517	regulation of phospholipase activity	-3.36629	11.3636	6.1738	23250	66	124	4	3.22581	1.58668	1956|2099|4035|6622	EGFR|ESR1|LRP1|SNCA	-2.5621
Input ID	GO Biological Processes	19	GO:0002709	regulation of T cell mediated immunity	-3.36629	11.3636	6.1738	23250	66	124	4	3.22581	1.58668	177|3146|3553|3569	AGER|HMGB1|IL1B|IL6	-2.5621
Input ID	GO Biological Processes	19	GO:0006639	acylglycerol metabolic process	-3.36607	7.94492	5.53814	23250	118	124	5	4.03226	1.76655	338|341|348|5294|23411	APOB|APOC1|APOE|PIK3CG|SIRT1	-2.56202
Input ID	GO Biological Processes	19	GO:0019439	aromatic compound catabolic process	-3.36548	3.38115	4.36391	23250	610	124	11	8.87097	2.55331	328|2475|2931|3146|3630|3643|3921|4968|5465|5562|10891	APEX1|MTOR|GSK3A|HMGB1|INS|INSR|RPSA|OGG1|PPARA|PRKAA1|PPARGC1A	-2.56156
Input ID	GO Biological Processes	19	GO:0007596	blood coagulation	-3.36301	4.49102	4.70564	23250	334	124	8	6.45161	2.20618	151|348|3569|5294|5566|6280|7099|11216	ADRA2B|APOE|IL6|PIK3CG|PRKACA|S100A9|TLR4|AKAP10	-2.55922
Input ID	GO Biological Processes	19	GO:0034698	response to gonadotropin	-3.35653	20.0893	7.40085	23250	28	124	3	2.41935	1.37981	4851|7490|10891	NOTCH1|WT1|PPARGC1A	-2.55423
Input ID	GO Biological Processes	19	GO:0034368	protein-lipid complex remodeling	-3.35653	20.0893	7.40085	23250	28	124	3	2.41935	1.37981	338|341|348	APOB|APOC1|APOE	-2.55423
Input ID	GO Biological Processes	19	GO:0034369	plasma lipoprotein particle remodeling	-3.35653	20.0893	7.40085	23250	28	124	3	2.41935	1.37981	338|341|348	APOB|APOC1|APOE	-2.55423
Input ID	GO Biological Processes	19	GO:0045822	negative regulation of heart contraction	-3.35653	20.0893	7.40085	23250	28	124	3	2.41935	1.37981	274|488|5294	BIN1|ATP2A2|PIK3CG	-2.55423
Input ID	GO Biological Processes	19	GO:2000108	positive regulation of leukocyte apoptotic process	-3.35653	20.0893	7.40085	23250	28	124	3	2.41935	1.37981	1029|7157|23411	CDKN2A|TP53|SIRT1	-2.55423
Input ID	GO Biological Processes	19	GO:0035066	positive regulation of histone acetylation	-3.35653	20.0893	7.40085	23250	28	124	3	2.41935	1.37981	672|3553|10891	BRCA1|IL1B|PPARGC1A	-2.55423
Input ID	GO Biological Processes	19	GO:2000144	positive regulation of DNA-templated transcription, initiation	-3.35653	20.0893	7.40085	23250	28	124	3	2.41935	1.37981	1499|2099|7157	CTNNB1|ESR1|TP53	-2.55423
Input ID	GO Biological Processes	19	GO:0032607	interferon-alpha production	-3.35653	20.0893	7.40085	23250	28	124	3	2.41935	1.37981	3146|5802|7099	HMGB1|PTPRS|TLR4	-2.55423
Input ID	GO Biological Processes	19	GO:0048643	positive regulation of skeletal muscle tissue development	-3.35653	20.0893	7.40085	23250	28	124	3	2.41935	1.37981	1499|5562|28514	CTNNB1|PRKAA1|DLL1	-2.55423
Input ID	KEGG Pathway	24	hsa04062	Chemokine signaling pathway	-3.35573	6.18132	5.13847	23250	182	124	6	4.83871	1.92701	1234|2931|2932|3845|5566|6654	CCR5|GSK3A|GSK3B|KRAS|PRKACA|SOS1	-2.55356
Input ID	GO Biological Processes	19	GO:1901137	carbohydrate derivative biosynthetic process	-3.35322	3.15126	4.2753	23250	714	124	12	9.67742	2.65502	1499|1950|3553|3630|3643|5074|5465|5562|5663|6622|10891|25825	CTNNB1|EGF|IL1B|INS|INSR|PAWR|PPARA|PRKAA1|PSEN1|SNCA|PPARGC1A|BACE2	-2.55119
[truncated: 2,786 more rows]
