# Supplementary material for: Candidate Genes and MiRNAs Linked to the Inverse Relationship Between Cancer and Alzheimer’s Disease: Insights From Data Mining and Enrichment Analysis
Source: Front Genet. 2019 Sep 24;10:846. doi: 10.3389/fgene.2019.00846 (PMC6771301; doi:10.3389/fgene.2019.00846)
Supplement: Table S6 — List of miRNAs targeting ALZCAN gene set and annotation (ToppGene). [file Table_6.xlsx]

## Sheet: Sheet1
miR ID	AD miRNA (HMDD v3.0)	Cancer miRNA (HMDD v3.0)	Experimental evidence	Source	q-value Bonferroni	Hit Count in ALZCAN geneset	Hit Count in Genome	Hit in ALZCAN geneset
hsa-miR-16-5p	yes	yes	Functional MTI	miRTarbase	0	29	1557	KRAS,CDKN2A,ABCC4,HTRA1,CIB1,ASCC1,WT1,RPSA,TKTL1,APP,PTGS2,GSK3B,HIGD1A,ADRA2B,IGF1R,BRCA1,EGFR,BSG,MTOR,SQSTM1,AGER,PRKAA1,ALDH2,SNCG,TARBP2,HSPA9,PRNP,TP53,HSP90AA1
hsa-miR-34a-5p	yes	yes	Functional MTI (Weak)	miRTarbase	0	20	735	CDKN2A,RCAN1,WNT1,CAPN1,BAG3,HMGB1,PPARA,XRCC1,DLL1,SIRT1,AKR7A2,IGF1R,PPP3R1,BRCA1,PIK3CG,TNF,CTNNB1,BECN1,NOTCH1,TP53
hsa-miR-26b-5p	yes	yes	Functional MTI (Weak)	miRTarbase	0	25	1874	CAPN9,TSPAN12,HTRA1,CIB1,STUB1,NRDC,FOLH1,PARK7,BAG3,INSR,HMGB1,LRP1B,PTGS2,GSK3B,IGF1R,PPP3R1,BRCA1,PIK3CG,PRKAA1,TLR4,PRKN,ADAM17,ABCG2,ATP2A2,TARBP2
hsa-miR-15a-5p	yes	yes	Functional MTI	miRTarbase	0	16	717	CDKN2B,ASCC1,WT1,TKTL1,APP,ATF2,GSK3B,HIGD1A,ADRA2B,BRCA1,BSG,UCP2,PRKAA1,SNCG,TARBP2,TP53
hsa-miR-181a-5p	yes	yes	Functional MTI	miRTarbase	0	14	553	KRAS,HDAC6,GSKIP,PTGS2,SIRT1,BRCA1,PEBP1,UCHL1,PRKN,ADAM17,ABCG2,CTNNB1,IL1A,NOTCH1
hsa-miR-200c-3p	no	no	Functional MTI	miRTarbase	0	10	214	KRAS,HFE,ADAM12,LRP1B,SIRT1,SH3PXD2A,PIN1,NOTCH1,DNMT3A,DNMT3B
hsa-miR-30a-5p	no	yes	Functional MTI	miRTarbase	0	15	734	ZMPSTE24,STUB1,ESR2,IGF1R,PPP3R1,EGFR,SH3PXD2A,PRKAA1,PAWR,CTNNB1,IL1A,BECN1,ATP2A2,NOTCH1,TP53
hsa-miR-155-5p	yes	yes	Functional MTI	miRTarbase	0	16	904	KRAS,CDKN2A,ABCC4,HTRA1,PSEN1,ADAM10,SIRT1,GSK3B,AKR7A2,EGFR,SH3PXD2A,PEBP1,DHCR24,AKAP10,CTNNB1,IL6
hsa-miR-22-3p	no	yes	Functional MTI	miRTarbase	0	9	163	HDAC6,WNT1,ESR1,HMGB1,RPSA,PPARA,SIRT1,BSG,PRKACA
hsa-miR-125b-5p	yes	yes	Functional MTI	miRTarbase	0	12	431	CDKN2A,ABCC4,NRDC,S100A8,IGF1R,EGFR,AKAP2,TNF,MMP2,NME2,BACE2,TP53
hsa-miR-9-5p	yes	yes	Functional MTI	miRTarbase	0	11	350	ESR1,PPARA,SIRT1,GSK3B,LMNA,PRKAA1,LRP1,MMP2,BECN1,IL6,NOTCH1
hsa-miR-30e-5p	no	yes	Functional MTI	miRTarbase	0	10	347	ZMPSTE24,SH3PXD2A,PRKAA1,PAWR,IL1A,BECN1,ATP2A2,NOTCH1,TP53,HSP90AA1
hsa-miR-92a-3p	no	yes	Functional MTI (Weak)	miRTarbase	0	17	1407	RCAN1,PARK7,ESR2,HMGB1,ADAM10,SIRT1,GSK3B,IGF1R,BSG,SH3PXD2A,PEBP1,UCHL1,DHCR24,AKAP10,PAWR,ATP2A2,NBR1
hsa-miR-200b-3p	no	yes	Functional MTI	miRTarbase	0	8	186	KRAS,HFE,WNT1,ADAM12,PIN1,NOTCH1,DNMT3A,DNMT3B
hsa-miR-195-5p	yes	yes	Functional MTI	miRTarbase	0	12	639	INSR,ASCC1,TKTL1,APP,GSK3B,HIGD1A,ADRA2B,BSG,AGER,PRKAA1,SNCG,TARBP2
hsa-miR-101-3p	no	yes	Functional MTI	miRTarbase	0	10	393	TSPAN12,HFE,APP,PTGS2,MTOR,PRKAA1,CTNNB1,NOTCH1,HSP90AA1,DNMT3A
hsa-miR-146a-5p	yes	yes	Functional MTI	miRTarbase	0	8	202	PTGS2,BRCA1,EGFR,SQSTM1,TLR4,IL6,NOTCH1,SOS1
hsa-miR-520g-3p	no	no	Functional MTI	miRTarbase	0	10	404	ZMPSTE24,MAPT,ESR2,APEX1,HMGB1,AKR7A2,DHCR24,MMP2,CTNNB1,PRNP
hsa-miR-520h	no	yes	Functional MTI	miRTarbase	0	10	407	ZMPSTE24,MAPT,ESR2,APEX1,HMGB1,AKR7A2,DHCR24,ABCG2,CTNNB1,PRNP
hsa-miR-224-5p	no	yes	Functional MTI	miRTarbase	0	7	132	KRAS,ASCC1,GSK3B,IGF1R,MTOR,PEBP1,HSP90AA1
hsa-miR-17-5p	yes	yes	Functional MTI	miRTarbase	0	15	1181	ESR2,APEX1,HMGB1,RPSA,APP,AKR7A2,PPP3R1,SQSTM1,TNF,MMP2,NBR1,HSPB2,PRNP,TP53,HSP90AA1
hsa-miR-27a-3p	yes	yes	Functional MTI (Weak)	miRTarbase	0	10	429	KRAS,APEX1,PPARG,GSK3B,EGFR,PIK3CG,SNCG,NME2,TP53,SOS1
hsa-miR-24-3p	no	yes	Functional MTI	miRTarbase	0	13	855	CDKN2A,ING1,S100A8,PPP3R1,BRCA1,SH3PXD2A,DHCR24,CCAR2,ADAM17,TNF,IL1B,NOTCH1,TP53
hsa-miR-143-3p	no	yes	Functional MTI	miRTarbase	0	8	228	KRAS,BAG3,PTGS2,AKR7A2,IGF1R,TNF,MMP2,DNMT3A
hsa-miR-484	no	yes	Functional MTI	miRTarbase	0	13	891	APEX1,APP,ADAM10,IGF1R,BRCA1,SQSTM1,PIN1,DHCR24,UCP2,BACE2,ATP2A2,TARBP2,HSP90AA1
hsa-miR-1-3p	no	yes	Functional MTI (Weak)	miRTarbase	0	13	921	KRAS,ABCC4,SIGMAR1,CAPN1,PPARG,ADAM12,ABCB1,HIGD1A,EGFR,TLR4,LRP1,ALDH2,IL6
hsa-miR-15b-5p	yes	yes	Functional MTI	miRTarbase	0	12	760	INSR,ASCC1,TKTL1,APP,GSK3B,HIGD1A,ADRA2B,BSG,PRKAA1,SNCG,ATP2A2,TARBP2
hsa-miR-21-5p	yes	yes	Functional MTI	miRTarbase	0	11	611	STUB1,HMGB1,PPARA,ATF2,ABCB1,IGF1R,BRCA1,EGFR,TLR4,MMP2,IL1B
hsa-miR-221-3p	no	yes	Functional MTI	miRTarbase	0.0001	9	368	ESR1,BAG3,SIRT1,MMP2,CTNNB1,NME2,BECN1,ATP2A2,TP53
hsa-miR-29b-3p	no	no	Functional MTI	miRTarbase	0.0001	8	261	ESR1,ADAM12,GSK3B,PIK3CG,PRKAA1,MMP2,DNMT3A,DNMT3B
hsa-miR-181b-5p	no	yes	Functional MTI	miRTarbase	0.0001	9	375	NRDC,GSKIP,HMGB1,SIRT1,IGF1R,MTOR,PEBP1,ADAM17,IL1A
hsa-miR-142-3p	yes	yes	Functional MTI	miRTarbase	0.0001	9	389	ESR1,HMGB1,XRCC1,PIK3CG,ABCG2,CTNNB1,IL1A,ATP2A2,IL6
hsa-miR-204-5p	no	yes	Functional MTI	miRTarbase	0.0001	9	399	PTGS2,SIRT1,PPP3R1,SH3PXD2A,AKAP2,CCR5,IL1B,NOTCH1,HSP90AA1
hsa-miR-124-3p	no	yes	Functional MTI (Weak)	miRTarbase	0.0002	15	1446	CDKN2A,ZMPSTE24,RCAN1,PPARA,GRM1,PTGS2,SIRT1,LMNA,SH3PXD2A,DHCR24,CCAR2,CTNNB1,IL6,DNMT3B,SOS1
hsa-miR-8485	no	no	Functional MTI (Weak)	miRTarbase	0.0002	12	877	MPO,ASCC1,WT1,GSK3B,PPARGC1A,IGF1R,SH3PXD2A,PIK3CG,PIN1,BHLHB9,AKAP2,ATP2A2
hsa-miR-26a-5p	yes	yes	Functional MTI	miRTarbase	0.0004	9	457	ESR1,PTGS2,GSK3B,BRCA1,PIK3CG,PRKAA1,ADAM17,IL6,DNMT3B
hsa-miR-497-5p	no	yes	Functional MTI	miRTarbase	0.0005	9	460	ASCC1,APP,HIGD1A,ADRA2B,IGF1R,MTOR,PRKAA1,SNCG,TARBP2
hsa-miR-451a	no	yes	Functional MTI	miRTarbase	0.0006	4	31	ADAM10,ABCB1,MMP2,IL6
hsa-miR-129-5p	no	yes	Functional MTI	miRTarbase	0.0006	10	625	ESR1,HMGB1,PPARA,ADAM12,ABCB1,AKR7A2,AKAP10,ADAM17,BECN1,NOTCH1
hsa-miR-874-3p	no	no	Functional MTI (Weak)	miRTarbase	0.0006	5	77	MAPT,ESR1,PIN1,BACE2,ATP2A2
hsa-miR-100-5p	yes	yes	Functional MTI	miRTarbase	0.0009	7	251	ESR1,APEX1,HMGB1,IGF1R,MTOR,BECN1,ATP2A2
hsa-miR-30d-5p	no	yes	Functional MTI	miRTarbase	0.001	8	368	ZMPSTE24,SH3PXD2A,PAWR,IL1A,BECN1,ATP2A2,NOTCH1,TP53
hsa-miR-152-3p	no	no	Functional MTI	miRTarbase	0.001	6	158	KRAS,WNT1,IGF1R,SH3PXD2A,ADAM17,HSP90AA1
hsa-let-7b-5p	yes	yes	Functional MTI	miRTarbase	0.0011	13	1215	NRDC,RCAN1,SIGMAR1,HMGB1,RPSA,PTGS2,GSK3A,PPARGC1A,IGF1R,SH3PXD2A,TLR4,ATP2A2,HSP90AA1
hsa-miR-660-3p	no	no	Functional MTI (Weak)	miRTarbase	0.0011	8	376	ING1,HMGB1,GRM1,AKR7A2,PEBP1,CCR5,TP53,DNMT3A
hsa-miR-30c-5p	no	yes	Functional MTI (Weak)	miRTarbase	0.0013	9	521	ZMPSTE24,SH3PXD2A,PAWR,IL1A,BECN1,ATP2A2,NOTCH1,TP53,HSP90AA1
hsa-miR-130a-3p	no	yes	Functional MTI	miRTarbase	0.0017	8	398	ESR1,PPARA,PPARG,APP,PPARGC1A,PRKAA1,TNF,PRNP
hsa-miR-30b-5p	no	yes	Functional MTI	miRTarbase	0.0024	8	416	ZMPSTE24,SH3PXD2A,PAWR,IL1A,BECN1,ATP2A2,NOTCH1,TP53
hsa-miR-140-5p	no	yes	Functional MTI	miRTarbase	0.0025	5	101	TSPAN12,ESR2,CAPN1,IGF1R,PIN1
hsa-miR-130b-3p	no	yes	Functional MTI	miRTarbase	0.0027	9	571	ESR1,PPARA,PPARG,DLL1,PPARGC1A,SH3PXD2A,PRKAA1,MMP2,PRNP
hsa-miR-27a-5p	no	yes	Functional MTI	miRTarbase	0.0027	4	45	APEX1,PPARA,EGFR,PEBP1
hsa-miR-7-5p	yes	yes	Functional MTI	miRTarbase	0.003	9	578	SIGMAR1,IDE,AKR7A2,IGF1R,EGFR,SQSTM1,PIK3CG,TLR4,SNCA
hsa-miR-203a-3p	no	no	Functional MTI	miRTarbase	0.0037	7	308	PARK7,GSK3B,IGF1R,CCR5,TNF,IL6,PRNP
hsa-miR-520c-3p	no	yes	Functional MTI	miRTarbase	0.0046	8	455	ESR1,ESR2,HMGB1,APP,SIRT1,IGF1R,MTOR,ADAM17
hsa-miR-6817-3p	no	no	Functional MTI (Weak)	miRTarbase	0.005	7	323	RCAN1,IDE,IGF1R,SH3PXD2A,BHLHB9,AKAP2,CCR5
hsa-miR-1277-5p	no	yes	Functional MTI (Weak)	miRTarbase	0.0055	9	624	ABCC4,GSK3B,HIGD1A,PPARGC1A,IGF1R,PIK3CG,AKAP2,BACE2,HSP90AA1
hsa-miR-192-5p	no	yes	Functional MTI (Weak)	miRTarbase	0.0057	11	994	CDKN2A,ESR1,WT1,PPARG,SIRT1,IGF1R,BRCA1,DHCR24,PAWR,ABCG2,PRNP
hsa-miR-3157-3p	no	no	Functional MTI (Weak)	miRTarbase	0.0057	4	54	MAPT,ESR1,BACE2,ATP2A2
hsa-miR-148a-3p	no	yes	Functional MTI	miRTarbase	0.0058	6	213	WNT1,HMGB1,SH3PXD2A,PRNP,HSP90AA1,DNMT3B
hsa-miR-146b-5p	no	yes	Functional MTI	miRTarbase	0.006	5	121	CASR,EGFR,SQSTM1,TLR4,IL6
hsa-miR-375	yes	yes	Functional MTI	miRTarbase	0.0065	8	477	CDKN2B,IGF1R,PEBP1,CTNNB1,IFI6,TP53,HSP90AA1,DNMT3B
hsa-let-7a-5p	no	yes	Functional MTI (Weak)	miRTarbase	0.0067	9	639	KRAS,WNT1,RPSA,APP,IGF1R,LMNA,EGFR,ATP2A2,IL6
hsa-miR-340-5p	no	yes	Functional MTI	miRTarbase	0.0072	7	341	KRAS,IGF1R,PPP3R1,LMNA,PEBP1,ABCG2,DNMT3A
hsa-miR-5003-5p	no	no	Functional MTI (Weak)	miRTarbase	0.0088	4	60	WT1,IGF1R,SH3PXD2A,TP53
hsa-miR-99a-5p	no	yes	Functional MTI	miRTarbase	0.0096	5	133	APEX1,IGF1R,MTOR,DHCR24,AKAP2
hsa-miR-128-3p	no	yes	Functional MTI	miRTarbase	0.0137	8	528	APEX1,PTGS2,SIRT1,AKR7A2,EGFR,MTOR,PRKAA1,SOS1
hsa-miR-615-3p	no	yes	Functional MTI	miRTarbase	0.0145	10	893	CDKN2A,NRDC,RPSA,OGG1,LMNA,CCAR2,ALDH2,NBR1,HSPA9,PRNP
hsa-miR-125b-1-3p	no	no	Functional MTI (Weak)	miRTarbase	0.0157	3	22	IGF1R,PRNP,TP53
hsa-miR-19b-3p	no	yes	Functional MTI (Weak)	miRTarbase	0.0162	9	714	ESR1,GSKIP,PPARA,ATF2,PRKAA1,CCAR2,PRKN,AKAP2,TP53
hsa-miR-200a-3p	no	yes	Functional MTI	miRTarbase	0.0171	5	150	HFE,HMGB1,EGFR,CTNNB1,TP53
hsa-miR-222-3p	no	yes	Functional MTI	miRTarbase	0.0183	7	394	PARK7,ESR1,APP,PEBP1,ABCG2,TP53,HSP90AA1
hsa-miR-511-3p	no	no	Functional MTI (Weak)	miRTarbase	0.0185	6	261	SIGMAR1,IGF1R,PIK3CG,AKAP2,CTSE,ATP2A2
hsa-miR-148b-3p	no	yes	Functional MTI	miRTarbase	0.0211	7	403	WNT1,HMGB1,SH3PXD2A,PIK3CG,PRKAA1,PRNP,HSP90AA1
hsa-miR-125a-5p	no	yes	Functional MTI	miRTarbase	0.0224	6	270	EGFR,MTOR,PIK3CG,NME2,BACE2,TP53
hsa-miR-19a-3p	no	yes	Functional MTI	miRTarbase	0.024	8	571	ESR1,GSKIP,PPARA,PRKAA1,PRKN,AKAP2,TNF,TP53
hsa-miR-215-5p	no	yes	Functional MTI	miRTarbase	0.0251	9	755	CDKN2A,WT1,PPARG,SIRT1,IGF1R,BRCA1,DHCR24,PAWR,PRNP
hsa-miR-223-5p	no	yes	Functional MTI (Weak)	miRTarbase	0.0298	6	284	SIGMAR1,IGF1R,EGF,AKAP2,CTSE,ATP2A2
hsa-miR-181d-5p	no	yes	Functional MTI	miRTarbase	0.0323	6	288	NRDC,GSKIP,HMGB1,PEBP1,ADAM17,IL1A
hsa-miR-6838-5p	no	no	Functional MTI (Weak)	miRTarbase	0.0325	7	431	ASCC1,APP,HIGD1A,ADRA2B,PRKAA1,SNCG,TARBP2
hsa-miR-5692a	no	no	Functional MTI (Weak)	miRTarbase	0.0329	6	289	TSPAN12,PPARA,LRP1B,PPP3R1,SH3PXD2A,TRDMT1
hsa-miR-491-5p	no	yes	Functional MTI	miRTarbase	0.0332	5	172	EGFR,SH3PXD2A,PIN1,MMP2,TP53
hsa-miR-181c-5p	yes	yes	Functional MTI	miRTarbase	0.0342	6	291	KRAS,GSKIP,SIRT1,PEBP1,ADAM17,IL1A
hsa-miR-4789-3p	no	no	Functional MTI (Weak)	miRTarbase	0.0355	6	293	PPARGC1A,IGF1R,PIK3CG,BHLHB9,ATP2A2,SOS1
hsa-miR-4755-3p	no	no	Functional MTI (Weak)	miRTarbase	0.0369	6	295	WT1,IDE,PPARA,IGF1R,PEBP1,PRKN
hsa-miR-205-5p	no	yes	Functional MTI	miRTarbase	0.0435	5	182	SIGMAR1,HMGB1,LMNA,DHCR24,LRP1
hsa-miR-6859-5p	no	no	Functional MTI (Weak)	miRTarbase	0.0435	5	182	KRAS,IGF1R,PIN1,BACE2,HSP90AA1
hsa-miR-7855-5p	no	no	Functional MTI (Weak)	miRTarbase	0.0439	4	90	CDKN2B,ESR1,IGF1R,NME2
hsa-miR-3125	no	no	Functional MTI (Weak)	miRTarbase	0.0446	5	183	KRAS,IGF1R,PIN1,BACE2,HSP90AA1
hsa-miR-7-1-3p	no	yes	Functional MTI (Weak)	miRTarbase	0.0458	5	184	ABCC4,IGF1R,EGFR,PRNP,HSP90AA1
hsa-miR-3916	no	yes	Functional MTI (Weak)	miRTarbase	0.0495	5	187	KRAS,IGF1R,PIN1,BACE2,HSP90AA1
